# Supplementary material for: Time‑resolved multi-omic analysis of paclitaxel exposure in human iPSC‑derived sensory neurons unveils mechanisms of chemotherapy‑induced peripheral neuropathy
Source: Cell Death Dis. 2026 Feb 10;17(1):211. doi: 10.1038/s41419-026-08445-2 (PMC12921266; doi:10.1038/s41419-026-08445-2)
Supplement: Supplementary file 10 — Suppl. Table 1. [file 41419_2026_8445_MOESM10_ESM.xlsx]

## Sheet: Suppl_Table1
		Donor
	iPSC-DSN cell line	Sex	Age	Ethnicity	CIPN	Link
	BIHi263-A	female	31	Caucasian	No	https://hpscreg.eu/cell-line/BIHi263-A
	BIHi264-A	female	50	Caucasian	Yes	https://hpscreg.eu/cell-line/BIHi264-A
	BIHi272-A	female	35	Caucasian	No	https://hpscreg.eu/cell-line/BIHi272-A
	BIHi273-A	female	63	Caucasian	Yes	https://hpscreg.eu/cell-line/BIHi273-A
	BIHi005-A	male	25-29	Asian	Control	https://hpscreg.eu/cell-line/BIHi005-A
	From Lewis et al., Stem Cell Res. 2025. PMID: 40015137.
