# Supplementary material for: Time‑resolved multi-omic analysis of paclitaxel exposure in human iPSC‑derived sensory neurons unveils mechanisms of chemotherapy‑induced peripheral neuropathy
Source: Cell Death Dis. 2026 Feb 10;17(1):211. doi: 10.1038/s41419-026-08445-2 (PMC12921266; doi:10.1038/s41419-026-08445-2)
Supplement: Supplementary file 11 — Suppl. Table 2. [file 41419_2026_8445_MOESM11_ESM.xlsx]

## Sheet: Suppl_Table2
gene_id	baseMean	log2FoldChange	lfcSE	stat	pvalue	padj	symbol.x	entrez.x	p264_1_Treatment	p264_2_Treatment	p264_3_Treatment	p264_1_Control	p264_2_Control	p264_3_Control	p263_4_Treatment	p263_5_Treatment	p263_6_Treatment	p273_7_Treatment	p273_8_Treatment	p273_9_Treatment	p272_10_Treatment	p272_11_Treatment	p272_12_Treatment	p263_4_Control	p263_5_Control	p263_6_Control	p273_7_Control	p273_8_Control	p273_9_Control	p272_10_Control	p272_11_Control	p272_12_Control	p005_13_Control	p005_13_Treatment	p005_14_Treatment	p005_15_Treatment	p005_14_Control	p005_15_Control	symbol.y	entrez.y	log2FoldChange_263A	padj_263A	log2FoldChange_264A	padj_264A	log2FoldChange_272A	padj_272A	log2FoldChange_273A	padj_273A	log2FoldChange_005A
ENSG00000135116	632.264	2.26532	0.122731	18.4576	4.53238e-76	9.45046e-72	HRK	8739	9.94151	9.95011	9.88625	7.53161	7.61008	7.65804	8.55482	8.58876	8.60947	10.1408	10.0425	9.95857	11.403	11.3122	10.9789	7.41628	7.01039	7.48863	8.34002	8.76311	8.56957	8.28687	8.21991	8.43224	7.60298	9.59635	9.48736	9.67014	7.78918	7.74678	HRK	8739	1.61352	1.77641e-07	2.52496	1.88649e-20	3.16612	5.80874e-38	1.62608	3.33993e-09	2.18098
ENSG00000197106	4987.67	-0.628525	0.0387547	-16.218	3.76012e-59	3.92012e-55	SLC6A17	388662	11.5422	11.5799	11.603	12.3194	12.3461	12.3337	11.9432	11.9575	12.0887	12.3964	12.2528	12.3529	11.6632	11.5863	11.6676	12.5138	12.4544	12.5718	13.0218	12.9545	12.9677	12.4625	12.3371	12.408	12.5135	12.2104	11.9122	12.2089	12.5561	12.5735	SLC6A17	388662	-0.517285	0.133501	-0.455392	0.00118652	-0.771209	0.000172507	-0.653665	0.00518003	-0.437349
ENSG00000133115	42.5672	4.49252	0.282333	15.9121	5.2218e-57	3.62933e-53	STOML3	161003	5.89275	6.03899	6.01011	4.83516	4.83516	5.13419	5.77961	5.69353	5.7813	6.87884	6.57934	6.57278	7.43861	7.44651	7.68472	4.83516	4.83516	4.83516	5.17736	5.41436	5.32208	5.29284	5.36618	5.50219	5.61148	8.00862	7.15937	8.37906	5.91372	5.41755	STOML3	161003	5.40035		4.35655		4.91103		4.07104		4.26183
ENSG00000146592	904.802	1.0587	0.0768345	13.779	3.41055e-43	1.77783e-39	CREB5	9586	9.92969	9.97588	9.9798	8.9881	9.16668	9.22815	9.75711	9.57962	9.65313	10.4082	10.4746	10.2432	10.7421	10.6594	10.4187	9.14117	8.91796	8.96115	9.18013	9.27249	9.21048	9.11351	9.01046	9.12609	9.74371	10.6756	10.8724	10.6307	10.0333	10.0449	CREB5	9586	0.715711	3.98971e-06	1.21754	2.06422e-09	1.63514	2.27325e-40	1.23334	2.59657e-21	0.813877
ENSG00000185813	2291.6	-0.747786	0.0543713	-13.7533	4.86314e-43	2.02803e-39	PCYT2	5833	10.6362	10.7738	10.6737	11.6594	11.7311	11.7206	11.1624	11.3363	11.2672	10.7922	10.6235	10.7562	10.3211	10.2383	10.2275	12.0077	12.085	11.9485	11.3306	11.0547	11.1035	10.9599	11.1354	11.0123	11.4128	10.8381	10.5308	10.9726	11.601	11.3321	PCYT2	5833	-0.76583	3.04208e-13	-0.545	4.12546e-05	-0.800194	6.25255e-15	-0.455634	0.00021431	-0.680027
ENSG00000164305	1202.73	0.912673	0.0674829	13.5245	1.12084e-41	3.89512e-38	CASP3	836	10.8681	10.9039	10.9804	10.281	10.246	10.2167	10.0439	10.0557	9.96029	10.9282	10.9422	10.699	11.2687	11.2013	10.8694	9.51822	9.60109	9.46478	9.86726	10.1105	9.86269	10.01	10.0178	9.75221	9.11233	9.94137	10.2795	9.98018	8.98688	9.01041	CASP3	836	0.528602	8.79035e-05	0.920792	6.8572e-07	1.24432	2.24879e-35	0.946136	9.95871e-19	1.11482
ENSG00000166483	424.991	1.12961	0.0842847	13.4024	5.85775e-41	1.74486e-37	WEE1	7465	9.6559	9.64295	9.70199	8.69215	8.66633	8.66479	7.90455	8.08288	8.03522	10.2152	9.76696	10.3071	9.43215	9.4562	9.37072	7.46229	7.59664	7.4744	8.93507	9.20935	9.21448	8.53965	8.36503	8.26619	7.05768	8.12654	8.46185	8.17505	6.83393	7.36916	WEE1	7465	0.655009	0.846259	0.964306	2.864e-10	1.16177	0.0173535	1.06409	0.0656729	1.54093
ENSG00000067064	3528.96	-0.82292	0.0630311	-13.0558	5.8897e-39	1.53508e-35	IDI1	3422	11.4107	11.5412	11.5898	12.6876	12.6288	12.5158	11.9409	11.8737	11.9005	10.9079	10.733	10.7447	10.7897	10.6856	10.554	12.7046	12.6931	12.7187	11.5201	11.3841	11.2182	11.7246	11.9206	11.4428	11.8473	11.4535	11.198	11.5887	12.0392	11.9775	IDI1	3422	-0.804804	5.73921e-13	-1.01289	1.09551e-14	-1.05216	4.22495e-23	-0.598465	1.20538e-06	-0.545413
ENSG00000092068	1228.57	-0.630171	0.0494607	-12.7408	3.50658e-37	8.12396e-34	SLC7A8	23428	8.91781	9.15663	9.16091	9.9107	9.95739	9.95008	9.8559	9.95112	10.041	10.1274	10.0608	10.2594	9.25125	9.18454	9.47771	10.6191	10.4632	10.5328	10.8235	10.727	10.8892	9.8032	9.88074	9.76876	11.1423	10.8815	10.7813	10.9389	11.3153	11.3938	SLC7A8	23428	-0.612052	0.526267	-0.500334	0.00128139	-0.544982	0.194178	-0.691835	0.132564	-0.432405
ENSG00000196843	459.79	1.95372	0.156588	12.4769	9.98232e-36	2.08141e-32	ARID5A	10865	9.30653	9.36275	9.32773	7.70727	7.79884	7.95574	8.08589	8.23443	7.99025	10.1424	10.0856	9.85965	10.4945	10.3577	9.87655	7.17348	7.26096	7.55761	8.17919	8.39231	8.44521	7.3412	7.52627	7.58483	8.17451	9.4332	9.94404	9.47688	7.86639	7.88773	ARID5A	10865	1.01845	0.201763	1.49251	1.19796e-16	3.21225	9.14595e-19	1.87495	4.45489e-06	1.8857
ENSG00000105953	3640.52	-0.356976	0.0286463	-12.4615	1.21028e-35	2.29414e-32	OGDH	4967	11.5569	11.5936	11.4753	11.9695	11.8859	11.9051	11.7967	11.8992	11.9384	11.8581	11.7197	11.8244	11.3546	11.3548	11.4523	12.1097	12.1234	12.2019	12.2838	12.0697	12.1889	11.7945	11.6885	11.7749	12.0076	11.7095	11.5292	11.7602	12.0488	12.0552	OGDH	4967	-0.264155	0.107572	-0.224732	0.0767869	-0.368898	0.000328659	-0.387857	0.000342971	-0.375742
ENSG00000175868	95.9676	2.1615	0.17461	12.379	3.39384e-35	5.89708e-32	CALCB	797	7.94397	7.86654	8.0629	6.18354	6.14977	6.10004	5.98219	6.18251	6.1512	7.96525	8.19455	7.89218	8.25814	8.37003	7.94286	5.45701	6.01891	5.53587	6.77266	6.62295	7.09241	6.76824	7.12845	7.20175	5.8187	7.03745	7.20583	7.46587	5.79464	5.63317	CALCB	797	1.1449	0.957073	2.43612	1.35764e-06	1.56544	0.13446	1.6659	0.191819	3.06587
ENSG00000154478	1031.16	-0.725799	0.0587149	-12.3614	4.22613e-35	6.29422e-32	GPR26	2849	9.11905	9.29727	9.19832	9.82262	9.90949	9.91	9.27091	9.27083	9.5404	11.024	10.6235	11.1418	8.86541	8.77549	8.86078	9.86959	9.93442	10.0922	11.7904	11.8473	11.9198	9.60521	9.29791	9.51282	8.76651	8.49718	8.16901	8.53811	8.99394	9.0457	GPR26	2849	-0.640557	0.451356	-0.548964	0.0293907	-0.707941	0.0604802	-0.928433	0.0135126	-0.609257
ENSG00000204052	355.21	-0.64869	0.0524605	-12.3653	4.02695e-35	6.29422e-32	LRRC73	221424	8.45735	8.6557	8.29709	9.1547	9.14162	9.02102	8.24656	8.42888	8.33694	8.79706	8.62392	8.59661	8.51072	8.52839	8.31065	8.73291	8.94576	8.90522	9.2001	9.23941	9.21448	8.99938	9.1398	9.29861	8.24123	7.7265	7.58707	7.71425	8.08513	7.9698	LRRC73	221424	-0.595105	0.000942833	-0.741859	0.0186228	-0.792734	1.80307e-09	-0.609264	8.37391e-05	-0.544785
ENSG00000152782	643.744	-0.505997	0.0414771	-12.1994	3.13096e-34	4.35225e-31	PANK1	53354	9.37098	9.46234	9.47718	10.0126	10.0136	9.90445	9.67363	9.73385	9.57395	8.94174	8.89851	9.08061	8.57276	8.56131	8.35727	10.0782	9.99096	10.1717	9.46062	9.44034	9.4498	9.10592	9.07134	8.81883	9.5068	9.23474	8.97161	9.22191	9.60951	9.55497	PANK1	53354	-0.441186	0.00235655	-0.324279	0.364603	-0.569235	8.98253e-06	-0.522489	0.000169923	-0.448799
ENSG00000136943	28.7144	1.84577	0.151759	12.1625	4.92252e-34	6.41496e-31	CTSV	1515	6.59676	6.75278	6.80032	5.86185	5.9203	5.89151	6.14893	5.99109	5.7813	6.30878	6.52234	6.19857	7.23318	7.16771	7.05387	5.37473	5.41597	4.83516	5.6639	5.87696	5.85182	5.8423	6.19694	6.16662	5.65354	6.02994	6.28812	6.0551	5.48399	5.45908	CTSV	1515	2.64345		2.53703		2.00225		1.36279		1.82193
ENSG00000162543	122.998	0.766708	0.0632878	12.1146	8.83606e-34	1.08377e-30	UBXN10	127733	7.68296	7.71646	7.56588	7.18283	7.1457	7.01758	7.57086	7.67771	7.70772	7.84642	7.57461	7.69253	7.72634	7.74332	7.69087	7.1594	7.16632	7.20668	7.42415	7.22462	7.45571	7.10958	6.99577	6.93653	7.1883	7.72316	7.60178	7.81228	7.11239	7.10533	UBXN10	127733	0.681104	0.0105183	0.6343	0.266137	1.01216	4.13709e-08	0.468092	0.082827	0.811855
ENSG00000085563	75.7938	2.04511	0.169128	12.0921	1.16269e-33	1.34685e-30	ABCB1	5243	7.08863	6.86421	7.10705	6.05833	5.72789	6.00141	5.91959	5.99109	5.7813	7.64201	7.18596	7.2471	8.90685	8.7386	7.90125	5.45701	5.5817	5.53587	6.57495	6.54605	6.58826	6.49262	6.53323	6.40503	6.06455	7.10248	7.06491	7.16212	5.97439	6.16854	ABCB1	5243	1.2988	0.857664	1.80557	0.0116248	2.99286	2.62498e-05	1.2895	0.281637	1.96302
ENSG00000145391	1835.68	0.510629	0.0428651	11.9125	1.01926e-32	1.11856e-29	SETD7	80854	10.5164	10.5628	10.6575	10.1186	10.246	10.191	10.405	10.4684	10.5095	11.1407	11.1063	11.1347	11.0384	11.1661	11.1348	10.1346	9.98874	10.1281	10.7871	10.7428	10.6269	10.5346	10.2207	10.4722	11.2039	11.7837	12.0243	11.7575	11.3367	11.3292	SETD7	80854	0.3991	0.398667	0.534852	0.0270329	0.725737	0.000123004	0.41747	0.117733	0.574585
ENSG00000100276	51.5654	1.39473	0.117343	11.886	1.40025e-32	1.45983e-29	RASL10A	10633	6.99657	7.26521	6.93184	6.39705	6.39349	6.10004	6.53394	6.65907	6.45191	7.09632	7.07777	6.78233	7.78586	7.64714	7.41309	6.01552	6.21436	6.19905	6.07962	6.27962	6.04657	6.38457	6.51058	6.54003	5.82697	6.21563	6.13389	6.33606	5.75375	5.78157	RASL10A	10633	0.864363	0.461044	1.59113	0.0506087	1.80423	5.99649e-08	1.61016		1.16693
ENSG00000186480	4046.07	-1.05459	0.0890861	-11.8379	2.48648e-32	2.46884e-29	INSIG1	3638	11.4318	11.5459	11.5898	12.989	13.0252	12.9205	12.034	11.9752	12.2133	11.0059	10.8361	10.7308	10.4409	10.2342	10.32	13.1156	13.2444	13.0966	11.7598	11.4287	11.0598	11.6826	11.677	11.2807	12.0263	11.5544	10.9124	11.6691	12.4964	12.2041	INSIG1	3638	-1.08108	1.08076e-12	-1.28009	2.45412e-13	-1.25806	1.15638e-17	-0.598223	0.00115871	-0.853522
ENSG00000113161	10611.3	-0.767848	0.065479	-11.7266	9.30919e-32	8.823e-29	HMGCR	3156	13.0727	13.0629	13.2183	14.2546	14.2807	14.1604	13.4397	13.3855	13.4917	12.3241	12.2114	12.1548	12.324	12.2574	12.2109	14.2638	14.1598	14.3147	12.9806	12.6826	12.3977	13.2765	13.0996	12.8485	13.5274	13.1809	12.9548	13.2945	13.9261	13.7662	HMGCR	3156	-0.806274	7.03386e-05	-1.1869	2.67549e-20	-0.824785	1.02346e-05	-0.480974	0.0545626	-0.60375
ENSG00000136842	1901.76	0.59148	0.0504803	11.717	1.04247e-31	9.45064e-29	TMOD1	7111	11.0754	11.0577	11.0726	10.4633	10.6774	10.5744	10.6003	10.4034	10.5965	11.6465	11.6022	11.5869	10.0292	10.0504	10.4142	10.0637	10.1953	10.2348	10.869	10.8414	10.8716	9.74831	9.63294	9.48303	11.471	11.8529	11.9335	11.9928	11.0928	11.1751	TMOD1	7111	0.391332	0.951619	0.329634	0.0262109	0.587934	0.148675	0.767988	0.072883	0.680144
ENSG00000102271	200.396	0.823141	0.0703575	11.6994	1.28351e-31	1.11511e-28	KLHL4	56062	7.89552	7.81478	7.99774	7.07475	7.39138	7.28999	7.63496	7.39407	7.45032	8.5432	8.35998	8.33174	9.0999	9.05919	8.72568	7.11625	7.14987	7.09785	7.84181	7.72645	7.87131	8.15249	7.96221	7.91468	7.7258	8.13281	8.37735	8.15526	7.58462	7.60431	KLHL4	56062	0.542732	0.956457	0.771282	0.245319	1.12992	0.0163751	0.73834	0.30179	0.736346
ENSG00000105327	936.326	0.837804	0.0717385	11.6786	1.64009e-31	1.3679e-28	BBC3	27113	10.0591	10.286	9.92638	9.23328	9.29235	9.38273	9.44749	9.59913	9.43146	10.642	10.8025	10.5563	11.0558	10.9873	10.8097	9.17862	9.30155	9.191	9.98459	9.8388	9.81085	9.68872	9.67962	9.961	9.15408	9.75057	9.94074	9.87854	8.96153	8.85473	BBC3	27113	0.300091	0.896309	0.963361	0.000286137	1.22825	9.14439e-10	0.82647	0.000490723	0.93382
ENSG00000112972	14174.2	-0.959615	0.0824522	-11.6384	2.62777e-31	2.10737e-28	HMGCS1	3157	13.5293	13.5673	13.7542	14.9432	14.9249	14.844	13.9606	13.8478	13.9687	12.4837	12.2368	12.0301	12.4756	12.2668	12.1742	14.7433	14.6362	14.7354	13.1477	12.8593	12.4642	13.7032	13.6535	13.2744	13.8375	13.3503	12.8787	13.4187	14.3161	14.1375	HMGCS1	3157	-0.776412	7.86916e-06	-1.01113	6.78008e-15	-1.25126	7.34838e-17	-0.595319	0.00161007	-0.879622
ENSG00000116133	13231	-0.835099	0.0720469	-11.591	4.57528e-31	3.5333e-28	DHCR24	1718	13.4041	13.4063	13.4429	14.5593	14.5227	14.4378	13.7308	13.8389	13.8575	12.6295	12.5246	12.2961	12.313	12.0983	12.1274	14.6152	14.5822	14.6281	13.2995	12.8426	12.6035	13.259	13.3397	13.0999	14.0675	13.6103	13.1715	13.6972	14.4534	14.2493	DHCR24	1718	-0.796114	4.05253e-05	-0.593198	3.93531e-10	-1.05957	4.11769e-10	-0.459842	0.0588211	-0.75842
ENSG00000237512	120.057	1.48011	0.127885	11.5737	5.59927e-31	4.16966e-28	UNC5B-AS1	728978	6.67289	7.06171	7.16063	6.46009	6.3658	6.44495	6.60451	6.43131	6.48087	8.8305	8.54126	8.68146	8.72247	8.5903	8.40241	6.01552	6.01891	6.02665	7.97915	7.94557	7.61265	7.06128	6.99577	6.88926	6.05816	6.9122	6.67903	6.99529	5.87821	5.89251	UNC5B-AS1	728978	1.07471	0.842826	1.62303	2.37156e-05	2.1105	0.00291805	1.0053	0.407711	1.91067
ENSG00000099194	13609.5	-0.963855	0.0835068	-11.5422	8.07952e-31	5.80917e-28	SCD	6319	13.4045	13.3591	13.4957	14.8736	14.8565	14.7727	13.8835	13.803	13.9189	12.5682	12.4214	12.242	12.0849	11.8112	11.9542	14.8248	14.7819	14.8125	13.1551	12.8584	12.4833	13.2704	13.2709	12.9736	13.7416	13.2693	13.2032	13.3282	14.2675	14.0669	SCD	6319	-0.935062	2.7388e-13	-1.15863	1.09388e-15	-1.23251	2.2083e-24	-0.446829	0.00542863	-0.779741
ENSG00000104549	5430.84	-0.716605	0.0623097	-11.5007	1.30842e-30	9.09399e-28	SQLE	6713	12.245	12.3045	12.3816	13.2561	13.2706	13.1971	12.5288	12.456	12.6074	11.6811	11.4458	11.4485	11.3599	11.2188	11.2223	13.1621	13.2602	13.2364	12.0501	11.9427	11.739	12.3287	12.3443	12.0255	12.4778	12.1368	11.7586	12.22	12.7744	12.5757	SQLE	6713	-0.68851	6.6634e-07	-0.917142	3.55156e-17	-0.984802	1.79642e-15	-0.394706	0.0214594	-0.570208
ENSG00000120437	3213.64	-1.0675	0.0932956	-11.4421	2.57485e-30	1.73187e-27	ACAT2	39	11.1937	11.1572	11.3052	12.7338	12.7358	12.6244	12.0252	12.0219	12.1065	10.2231	10.1659	9.99203	10.1042	9.89328	9.80179	12.9619	13.0185	12.9065	11.2149	10.673	10.3898	11.3716	11.4665	11.0209	11.4775	10.9263	10.3529	11.1582	11.799	11.6195	ACAT2	39	-0.915576	4.63865e-05	-0.939789	4.03263e-12	-1.40904	3.55646e-13	-0.699708	0.00500742	-0.806081
ENSG00000164211	1359.06	-0.885944	0.0775741	-11.4206	3.29865e-30	2.14938e-27	STARD4	134429	10.0394	10.1812	10.2761	11.2461	11.2703	11.2545	10.3499	10.3084	10.2813	9.67654	9.45387	9.69724	9.40524	9.37922	9.26933	11.4669	11.4585	11.4698	10.2019	10.1146	9.84218	10.4355	10.3661	9.96639	10.448	10.1781	9.6858	10.2514	10.9086	10.6699	STARD4	134429	-1.18345	1.09516e-17	-0.839853	1.02013e-05	-0.974968	2.63443e-12	-0.47632	0.0107868	-0.656301
ENSG00000150593	925.837	0.721198	0.06317	11.4168	3.44767e-30	2.1784e-27	PDCD4	27250	10.0306	10.055	10.0058	9.33803	9.23258	9.22815	9.38036	9.38772	9.49335	10.0214	10.151	10.1831	10.3292	10.2433	10.2337	8.83469	8.57013	8.94611	9.41694	9.5342	9.53539	9.53924	9.48834	9.4679	10.4823	10.7249	11.3423	10.5908	10.0874	10.4056	PDCD4	27250	0.705283	1.20929e-05	0.583845	0.0133995	0.822936	2.58676e-10	0.662779	6.52334e-06	0.60293
ENSG00000162645	39.4533	2.10541	0.184759	11.3954	4.40624e-30	2.6113e-27	GBP2	2634	6.62267	6.79853	7.21214	5.74471	5.96252	5.9296	6.24675	6.03242	6.07118	7.31983	7.13297	7.08956	6.8813	6.791	6.73247	5.80752	5.41597	6.07257	5.99211	6.21075	5.73574	5.79247	5.6404	5.89624	5.90562	6.60581	7.29112	6.76751	5.60649	5.78999	GBP2	2634	0.850115	0.9999	1.7382	3.05679e-07	2.27945	0.126848	2.25808	0.220792	2.4823
ENSG00000172893	3939.85	-0.866978	0.0760945	-11.3934	4.5085e-30	2.6113e-27	DHCR7	1717	10.6988	10.6886	10.6604	11.8131	11.7794	11.797	12.2084	12.3275	12.361	11.1783	11.1549	11.0476	10.9271	10.696	10.6799	13.147	13.2274	13.2136	11.8528	11.4537	11.3429	11.7672	11.9182	11.6633	12.4164	11.885	11.2938	12.1177	12.8407	12.5028	DHCR7	1717	-0.898348	1.54975e-13	-0.920804	3.28867e-10	-1.03529	9.14595e-19	-0.449995	0.00295927	-0.802915
ENSG00000156381	1119	-0.552801	0.0485043	-11.397	4.33011e-30	2.6113e-27	ANKRD9	122416	9.92969	10.0283	9.68454	10.6449	10.5529	10.4618	10.5884	10.6649	10.6504	9.96997	9.93009	9.98031	9.14944	9.14179	9.40605	10.9849	11.3038	11.2019	10.5882	10.3477	10.572	9.6371	9.7024	9.9264	9.72772	9.40625	9.19105	9.41266	9.75628	9.63853	ANKRD9	122416	-0.544786	0.000639822	-0.462252	0.0410125	-0.5642	0.000132972	-0.574083	0.000181982	-0.399878
ENSG00000110921	1463.95	-0.681455	0.0601053	-11.3377	8.53721e-30	4.81106e-27	MVK	4598	10.0785	10.25	10.1631	11.0571	10.9588	11.0628	10.7334	10.8331	10.623	9.90887	9.72168	9.79865	9.91585	9.77955	9.76219	11.3601	11.5486	11.438	10.3889	10.1525	10.0554	10.4049	10.6754	10.3918	10.7049	10.3534	9.87655	10.3983	11.0522	10.754	MVK	4598	-0.732774	1.9315e-05	-0.664959	0.000934323	-0.707781	1.32931e-05	-0.417173	0.0624853	-0.642451
ENSG00000130766	1464.34	0.64161	0.0571359	11.2295	2.92002e-29	1.60225e-26	SESN2	83667	10.2346	10.0724	9.9893	9.4939	9.53422	9.58152	9.38949	9.55983	9.42144	11.0648	11.2918	10.9962	11.4182	11.4995	11.3233	9.25071	9.16648	9.27755	10.5668	10.4034	10.4469	10.4324	10.4138	10.6897	10.8256	11.2912	11.3699	11.3524	10.6378	10.5054	SESN2	83667	0.254469	0.690343	1.38145	1.38412e-18	0.926942	1.00919e-14	0.66821	6.99845e-07	0.690356
ENSG00000052802	3879.3	-0.922806	0.0831088	-11.1036	1.20504e-28	6.44262e-26	MSMO1	6307	11.6141	11.6986	11.7905	12.9462	12.9146	12.8188	11.9425	11.7823	12.023	10.9492	10.8571	10.7505	10.9798	10.7929	10.8041	12.7328	12.7505	12.7289	11.5661	11.4384	11.0575	12.2062	12.4007	11.8311	11.881	11.3972	10.8974	11.5971	12.1993	12.0049	MSMO1	6307	-0.822732	9.23073e-12	-1.13004	2.15589e-15	-1.32676	1.16059e-32	-0.53023	0.000150153	-0.720901
ENSG00000070610	3484.96	-0.216506	0.019507	-11.0989	1.2703e-28	6.62174e-26	GBA2	57704	11.6527	11.6837	11.5921	11.9105	11.8604	11.886	11.8612	11.9581	11.8896	11.7093	11.6603	11.6282	11.6433	11.6286	11.5493	12.0232	12.1652	12.049	11.8907	11.824	11.8669	11.8651	11.8424	11.8656	11.7793	11.5982	11.5058	11.5555	11.7397	11.7572	GBA2	57704	-0.172994	0.0441229	-0.106527	0.574479	-0.250883	1.32948e-05	-0.198889	0.00432984	-0.212076
ENSG00000100075	2600.72	-0.438311	0.0395009	-11.0962	1.30844e-28	6.65422e-26	SLC25A1	6576	11.4451	11.4788	11.3334	12.0349	11.9705	11.9019	11.2476	11.5423	11.3799	10.8714	10.8201	10.7991	10.9288	10.8004	10.9678	11.7354	12.0246	11.9001	11.1539	11.0483	11.0959	11.3267	11.5194	11.3983	11.3996	11.0015	11.0206	11.0434	11.3373	11.273	SLC25A1	6576	-0.49904	0.000709996	-0.333962	0.149259	-0.526228	4.79658e-05	-0.278717	0.149238	-0.327513
ENSG00000174669	561.894	-0.56675	0.0516204	-10.9792	4.81271e-28	2.38928e-25	SLC29A2	3177	8.81326	8.98227	8.99594	9.46337	9.35284	9.53434	9.24093	9.27777	9.2508	9.2532	9.28112	9.19002	8.78399	8.77268	8.70487	9.78616	9.99318	9.77044	9.38939	9.51898	9.63418	9.20864	9.25537	9.26689	9.29327	8.79493	8.47764	8.81541	9.4939	9.27709	SLC29A2	3177	-0.638741	1.77641e-07	-0.679648	0.00118652	-0.544825	4.93856e-06	-0.302812	0.0662967	-0.731119
ENSG00000170522	2997.72	-0.600523	0.0548781	-10.9429	7.1889e-28	3.48595e-25	ELOVL6	79071	11.3552	11.3857	11.4703	12.2816	12.2935	12.2798	11.5282	11.4411	11.5821	10.9959	11.0605	11.0644	10.6334	10.7179	10.5916	12.2823	12.0751	12.1993	11.5492	11.4846	11.2966	11.1402	11.0323	10.9983	11.6534	11.4457	11.1386	11.5121	12.1277	12.0232	ELOVL6	79071	-0.67617	6.09022e-14	-0.760758	2.864e-10	-0.418833	1.51426e-05	-0.418516	4.73247e-05	-0.585629
ENSG00000079459	5649.19	-0.794629	0.0726725	-10.9344	7.89463e-28	3.74116e-25	FDFT1	2222	12.1651	12.1786	12.2155	13.3588	13.2565	13.1957	12.4922	12.6251	12.7124	11.546	11.5449	11.4054	11.4169	11.2291	11.4434	13.2703	13.3607	13.3131	12.1338	11.8197	11.6409	12.4261	12.6364	12.2536	12.5926	12.1609	11.7419	12.2532	12.9129	12.7139	FDFT1	2222	-0.702424	1.26442e-06	-0.921203	1.14085e-11	-1.09435	1.17482e-17	-0.387262	0.0360864	-0.685499
ENSG00000167114	3369.65	-0.29941	0.0279638	-10.7071	9.43068e-27	4.36976e-24	SLC27A4	10999	11.5933	11.583	11.5827	11.8832	11.8098	11.7754	11.6762	11.7645	11.8467	11.6359	11.5195	11.5517	11.5073	11.4752	11.5846	11.9573	12.0396	11.9752	11.9792	11.7672	11.9465	11.8561	11.8986	11.9354	11.8018	11.5043	11.3781	11.5642	11.814	11.7409	SLC27A4	10999	-0.224776	0.304777	-0.105362	0.67724	-0.37727	0.000173177	-0.337297	0.00316262	-0.310057
ENSG00000177606	4577.39	0.980323	0.0917275	10.6873	1.1667e-26	5.28846e-24	JUN	3725	12.4656	12.5083	12.432	11.5692	11.4498	11.5236	11.8272	12.1036	12.008	12.7627	12.6243	12.6215	13.3909	13.168	12.874	11.5855	11.4456	11.4164	11.4453	11.7162	11.6904	11.3573	11.3145	11.7138	11.7784	12.4328	12.2906	12.6168	11.9514	11.6409	JUN	3725	0.513194	0.00188478	0.994415	2.15589e-15	1.70939	3.92346e-46	1.06064	6.27516e-17	0.662807
ENSG00000118407	228.648	1.3744	0.129294	10.63	2.16018e-26	9.38372e-24	FILIP1	27145	8.93689	8.836	9.01938	7.9939	8.18608	7.99152	7.53767	7.5895	7.43677	7.81296	7.68701	7.45925	9.38987	9.25842	8.65922	6.70736	6.91502	6.87143	6.52006	6.91	6.97876	7.15617	7.1968	7.06883	7.96588	8.88109	8.71461	9.1581	8.02693	8.03165	FILIP1	27145	1.04303	0.00287113	0.84798	0.0983435	2.49991	2.15153e-29	1.24305	4.17946e-05	1.08544
ENSG00000168917	1795.35	-0.446781	0.0420273	-10.6307	2.14432e-26	9.38372e-24	SLC35G2	80723	10.5275	10.641	10.7258	11.0605	11.0916	11.0826	10.6916	10.7181	10.8759	10.9205	10.931	10.9205	10.0159	9.94633	9.96267	11.1062	11.2539	11.1934	11.4553	11.4931	11.5243	10.4294	10.5059	10.329	10.9829	10.6405	10.344	10.8257	10.9097	10.8432	SLC35G2	80723	-0.427523	0.00123	-0.360177	0.0179533	-0.46686	5.49792e-05	-0.58272	1.70133e-07	-0.307675
ENSG00000149485	2790.37	-0.414151	0.038985	-10.6233	2.32093e-26	9.87628e-24	FADS1	3992	11.62	11.6124	11.6805	12.2912	12.2165	12.1948	11.5987	11.5111	11.6154	10.9783	11.0908	10.9	10.9832	10.9969	10.9584	12.1649	12.1857	12.1818	11.2847	11.2385	11.0948	11.2787	11.2619	11.2472	11.0697	10.7582	10.7776	10.7382	11.1289	11.0492	FADS1	3992	-0.606448	2.06444e-07	-0.530246	0.00010859	-0.287133	0.0346284	-0.224494	0.233512	-0.338707
ENSG00000133101	635.293	-0.58277	0.0553768	-10.5237	6.71732e-26	2.80126e-23	CCNA1	8900	8.8936	8.97763	9.02864	9.5238	9.45803	9.65172	8.93232	8.76259	8.9213	9.86128	9.63884	9.85324	9.30504	9.16333	9.24283	9.57289	9.71294	9.57296	10.3855	10.1505	10.0193	9.93083	9.88473	9.73125	8.85619	8.54945	8.28152	8.62184	8.74385	8.95374	CCNA1	8900	-0.818114	0.00157147	-0.0918883	0.839466	-0.658712	0.00443084	-0.429265	0.191493	-0.416856
ENSG00000106341	238.57	1.28206	0.122573	10.4596	1.32395e-25	5.41289e-23	PPP1R17	10842	8.40332	8.54684	8.68003	7.90472	8.11371	8.24323	8.11952	8.03405	7.96257	8.18947	8.25987	8.41006	8.67805	8.83044	9.34604	7.47356	7.49791	7.35496	6.81755	6.92961	7.11043	7.92777	7.62703	7.66819	7.75241	8.79336	8.87586	9.18472	7.46123	7.27476	PPP1R17	10842	0.782356	0.0368809	1.61224	0.00151225	1.48267	3.95376e-11	1.80717	2.74432e-12	1.76832
ENSG00000178234	2888.51	-0.198753	0.0191186	-10.3958	2.59002e-25	1.03855e-22	GALNT11	63917	11.5329	11.6287	11.5598	11.8251	11.8233	11.8069	11.4884	11.5616	11.4813	11.482	11.4725	11.4321	11.3876	11.4174	11.398	11.6713	11.7778	11.7326	11.743	11.7075	11.6048	11.59	11.5991	11.5441	11.2178	11.1046	11.0779	11.1107	11.2366	11.2524	GALNT11	63917	-0.21494	0.0315469	-0.0265657	0.944955	-0.177087	0.0271089	-0.229931	0.00594162	-0.144779
ENSG00000075415	9286.33	-0.248455	0.0239593	-10.3699	3.39913e-25	1.33727e-22	SLC25A3	5250	13.0396	13.0375	13.069	13.3785	13.2967	13.2826	13.1307	13.1848	13.2646	13.0695	13.0416	13.0411	12.8095	12.7999	12.9093	13.4323	13.4762	13.4617	13.3346	13.231	13.2049	13.0791	13.2664	13.0814	13.3837	13.1296	13.0946	13.2146	13.2939	13.3419	SLC25A3	5250	-0.258547	0.000750275	-0.360536	0.00117204	-0.303646	3.7784e-06	-0.20991	0.00862824	-0.197627
ENSG00000166508	775.46	0.646604	0.0623761	10.3662	3.53239e-25	1.36396e-22	MCM7	4176	10.1576	9.61637	9.63695	9.18415	9.02895	9.13625	9.50325	9.72119	9.79434	9.96059	10.0878	9.93244	9.96731	10.0023	10.1724	9.38487	9.37825	9.40015	9.29971	9.40433	9.36241	9.24361	9.23361	9.40838	9.69774	10.1727	10.4621	10.0408	9.49796	9.67898	MCM7	4176	0.319168	0.995764	0.252468	0.606803	0.811206	0.0376415	0.684018	0.181323	0.639042
ENSG00000117597	547.626	0.357176	0.0346218	10.3165	5.93479e-25	2.24993e-22	UTP25	27042	9.06808	9.1276	8.97212	8.69215	8.71092	8.75838	8.80814	8.93525	8.95416	9.96435	9.89228	10.0455	9.14741	9.24233	9.22419	8.7466	8.69572	8.66902	9.64079	9.77618	9.70974	8.87091	8.73722	8.83468	9.09963	9.46162	9.57638	9.52863	9.13544	9.20326	UTP25	27042	0.228873	0.9999	0.525218	0.101953	0.439119	0.20781	0.273991	0.676546	0.406934
ENSG00000278952	81.4723	-1.0572	0.102678	-10.2963	7.31865e-25	2.72502e-22	NA	NA	6.7902	6.75278	6.93184	7.64706	7.49932	7.45551	6.76493	7.24137	7.2155	5.95794	6.10371	6.02622	6.24446	6.22958	5.81895	8.0887	8.05004	8.00281	6.23486	6.01576	6.08966	6.59159	6.98016	6.7177	7.44573	6.79375	6.7081	7.003	7.65895	7.39437	NA	NA	-1.28612	0.00164132	-0.953137	0.291155	-1.31071	0.00148516	-0.223289	0.919204	-0.994681
ENSG00000133935	1311.3	-0.607554	0.0590635	-10.2865	8.11082e-25	2.96699e-22	ERG28	11161	10.3402	10.2785	10.3011	11.1903	11.1339	11.0207	10.3959	10.3534	10.4218	9.79738	9.79455	9.60606	9.9799	9.90481	9.90799	11.0367	11.1693	11.0512	10.2039	9.77105	9.81875	10.5625	10.7797	10.4117	10.3447	9.90736	9.73346	10.0262	10.5282	10.3561	ERG28	11161	-0.715448	2.59235e-06	-0.808894	1.02013e-05	-0.689806	1.55453e-06	-0.224404	0.448171	-0.547024
ENSG00000160285	7265.06	-0.713486	0.0695001	-10.266	1.00314e-24	3.6063e-22	LSS	4047	12.3887	12.422	12.3487	13.5086	13.431	13.4765	13.0618	13.1018	13.0299	12.0953	12.0965	11.9613	11.7096	11.6306	11.7352	13.8689	13.9751	13.747	12.4713	12.2568	12.1864	12.3214	12.4523	12.2863	13.0017	12.583	12.1216	12.6681	13.4587	13.1025	LSS	4047	-0.801197	0.000302605	-0.949253	2.80527e-18	-0.668639	0.00155421	-0.262206	0.541444	-0.731197
ENSG00000102468	106.432	1.01285	0.0988404	10.2473	1.21661e-24	4.29959e-22	HTR2A	3356	8.05386	7.84607	7.89908	7.26666	7.4038	7.2782	7.17401	6.85106	7.13285	7.73459	7.45222	7.48217	6.7733	6.75502	6.95185	6.58051	6.65206	7.01998	6.57495	6.51929	6.41424	6.09474	6.28397	6.13656	7.45801	8.01271	8.13943	8.34073	7.50421	7.34347	HTR2A	3356	0.484361	0.9999	0.404609	0.418999	1.27345	0.0716419	1.67313	0.016179	0.948984
ENSG00000183783	706.431	-0.630963	0.061857	-10.2003	1.9759e-24	6.86659e-22	KCTD8	386617	8.57191	8.911	8.82555	9.20072	9.28909	9.22518	8.11952	8.45987	8.2254	9.50384	9.50824	9.65114	9.98104	10.0306	10.1119	8.90958	8.74934	8.85242	10.188	10.2086	10.3376	10.5994	10.7936	10.7451	9.18205	9.00914	8.41614	9.03212	9.48845	9.33471	KCTD8	386617	-0.648181	0.235714	-0.788021	0.000256723	-0.699487	0.0156971	-0.734562	0.0236561	-0.548172
ENSG00000172840	786.403	-0.405171	0.0399542	-10.1409	3.63754e-24	1.24338e-21	PDP2	57546	9.44601	9.44229	9.51058	9.96496	10.0195	9.88954	9.71779	9.46576	9.80722	9.41867	9.26542	9.43613	8.9212	9.10888	9.05396	10.1518	9.96184	10.0508	9.79303	9.76332	9.6222	9.43726	9.37088	9.29575	10.1108	9.93463	9.78958	9.93968	10.274	10.2832	PDP2	57546	-0.409894	0.00591902	-0.287319	0.323546	-0.369957	0.00484947	-0.379871	0.0094188	-0.355835
ENSG00000109929	2534.7	-0.604126	0.0597804	-10.1057	5.20978e-24	1.75208e-21	SC5D	6309	10.9429	10.8365	11.0625	11.7901	11.8544	11.8325	11.2762	11.0919	11.2939	11.0114	10.8545	10.9835	10.9152	10.7881	10.8899	11.9954	11.8717	11.9149	11.3459	11.2994	11.043	11.5354	11.5359	11.1512	11.3818	11.0494	10.7705	11.1573	11.6827	11.533	SC5D	6309	-0.714533	1.53594e-11	-0.710204	9.68455e-09	-0.563522	1.29455e-07	-0.292487	0.049551	-0.550376
ENSG00000196312	606.329	0.389877	0.0387945	10.0498	9.20487e-24	3.04652e-21	MFSD14CP	84278	9.54551	9.64587	9.56247	9.20893	9.22579	9.14571	9.48206	9.20315	9.24323	9.7261	9.6985	9.58556	9.60912	9.65908	9.56089	8.89328	9.06881	9.11243	9.47051	9.30482	9.37675	9.33723	9.05014	9.3518	9.02568	9.51066	9.46913	9.41404	8.98236	9.10698	MFSD14CP	84278	0.319294	0.498268	0.0139327	0.989953	0.391887	0.0266073	0.307216	0.206946	0.464434
ENSG00000161267	918.216	-0.430948	0.0428932	-10.047	9.46936e-24	3.08509e-21	BDH1	622	9.48211	9.54924	9.53676	9.9722	9.98579	10.0151	9.94526	9.96407	9.84016	9.70603	9.69264	9.67073	9.37087	9.27829	9.26933	10.2316	10.31	10.357	10.1999	9.8388	10.0554	9.80085	9.82993	9.88336	10.3551	10.1422	9.77589	10.1208	10.3769	10.2854	BDH1	622	-0.398175	0.0563488	-0.490963	0.0208867	-0.570063	5.10802e-05	-0.372268	0.0426694	-0.334594
ENSG00000111266	822.863	1.03706	0.104069	9.96505	2.16765e-23	6.95349e-21	DUSP16	80824	10.4796	10.2953	10.3645	9.61305	9.48387	9.62495	9.78505	9.61839	9.62722	10.0178	9.99573	9.89547	10.6853	10.5952	10.1928	9.39358	9.05186	9.191	8.87663	9.12328	8.89346	8.75913	8.60269	8.68964	9.3629	10.1174	10.4211	10.1123	9.46417	9.57297	DUSP16	80824	0.500559	0.100787	0.874055	0.000235539	1.97522	1.77359e-34	1.08542	1.83216e-09	0.798365
ENSG00000167508	5178.62	-0.889821	0.0893122	-9.96304	2.21202e-23	6.98829e-21	MVD	4597	11.7693	11.9561	11.738	13.174	13.0917	13.1715	12.4848	12.6416	12.5634	11.3703	11.2456	11.0221	11.5517	11.3208	11.2139	13.4684	13.752	13.4529	11.7396	11.4082	11.3601	12.1668	12.6311	12.2176	12.2285	11.6857	11.1643	11.7941	12.6005	12.2163	MVD	4597	-1.00173	0.000299924	-0.992937	1.61258e-07	-0.997471	7.12947e-05	-0.300765	0.596858	-0.798817
ENSG00000100505	913.273	0.578366	0.0581795	9.94106	2.75869e-23	8.58528e-21	TRIM9	114088	10.6692	10.4867	10.3826	10.1359	10.1896	10.1146	9.12532	9.22845	9.09128	9.93783	10.0967	9.81634	11.1951	11.1163	10.7137	8.83469	8.77024	8.79759	9.46392	9.42081	9.43617	10.2777	10.1446	10.231	8.66305	9.35611	9.40072	9.4449	8.9843	8.70153	TRIM9	114088	0.395657	0.28284	0.316064	0.239513	0.837945	9.43308e-09	0.548518	0.00321664	0.67458
ENSG00000147383	1023.02	-0.687912	0.0696523	-9.87637	5.27068e-23	1.59274e-20	NSDHL	50814	9.85912	9.79815	9.78893	10.9597	10.7263	10.7641	9.89167	10.0737	10.041	9.59642	9.62661	9.32608	9.36913	9.20129	9.27739	10.8545	10.9115	10.7541	9.89199	9.71071	9.66371	9.72625	10.1211	9.82917	10.1231	9.75501	9.46651	9.82644	10.3961	10.1982	NSDHL	50814	-0.866468	1.08076e-12	-0.838488	4.278e-06	-0.663082	1.37331e-07	-0.256857	0.233512	-0.586917
ENSG00000129244	1284.48	-0.580541	0.0587751	-9.87733	5.22078e-23	1.59274e-20	ATP1B2	482	10.8755	10.7765	10.6899	11.6368	11.6211	11.6091	10.1551	10.0147	10.0945	9.45922	9.30052	9.31054	10.1586	9.96481	9.61748	10.5391	10.4902	10.4431	9.8061	9.94963	9.96819	10.6221	10.7527	10.5108	9.87711	9.77382	9.55741	9.62172	9.9849	9.93935	ATP1B2	482	-0.417592	0.108411	-0.314731	0.180644	-0.731096	1.3589e-06	-0.593107	0.0011183	-0.301685
ENSG00000198576	191.858	1.07937	0.109753	9.83448	7.99792e-23	2.35739e-20	ARC	23237	8.82867	8.83086	8.58251	7.89445	7.85349	7.76172	7.17401	7.25599	7.27814	8.87123	8.75376	8.53888	8.97031	8.6527	8.31065	7.07164	6.87481	7.17138	7.83147	7.8502	7.88154	7.31434	7.69344	7.63176	6.5364	7.41048	6.88644	7.62666	6.53988	6.43152	ARC	23237	0.300538	0.98067	0.809546	0.225689	1.37807	7.18165e-12	1.05061	2.7248e-06	1.37354
ENSG00000120992	1455.37	-0.264737	0.0269202	-9.83411	8.02718e-23	2.35739e-20	LYPLA1	10434	10.6053	10.5995	10.7187	10.8837	10.8583	10.8445	10.5604	10.5987	10.6814	10.5387	10.4119	10.5511	10.2148	10.222	10.1692	10.8054	10.8867	10.8282	10.8728	10.8989	10.791	10.6007	10.5072	10.4222	10.2983	10.0458	10.0891	10.1047	10.3045	10.2069	LYPLA1	10434	-0.228276	0.671041	-0.192534	0.537837	-0.319766	0.033107	-0.366485	0.0240907	-0.204245
ENSG00000072042	3131.85	-0.320674	0.0326196	-9.83072	8.30255e-23	2.4044e-20	RDH11	51109	11.8791	11.9058	12.0035	12.3769	12.3048	12.2865	11.7984	11.8495	11.8467	11.0195	11.1129	10.9933	11.0091	11.0124	10.9108	12.1406	12.101	12.0331	11.3725	11.277	11.1901	11.3794	11.4804	11.2219	11.6007	11.3313	11.1305	11.413	11.6073	11.5555	RDH11	51109	-0.259493	0.382289	-0.247442	0.236402	-0.392757	0.002706	-0.247052	0.195449	-0.299962
ENSG00000121413	1682.64	0.24862	0.0253095	9.82319	8.94654e-23	2.5554e-20	ZSCAN18	65982	10.9252	11.0729	10.9466	10.6807	10.6687	10.7994	10.6637	10.7889	10.8072	10.7373	10.8997	10.7597	11.1971	11.1882	11.1551	10.5546	10.6032	10.5278	10.5897	10.5483	10.6119	10.9356	10.9501	10.8825	10.4324	10.6239	10.608	10.5889	10.2727	10.3397	ZSCAN18	65982	0.206438	0.239841	0.0951393	0.804619	0.267733	0.00205634	0.221467	0.0517331	0.263912
ENSG00000060762	867.613	-0.439459	0.0449389	-9.77903	1.38532e-22	3.90342e-20	MPC1	51660	9.39528	9.27854	9.39369	9.75982	9.73883	9.71231	9.43872	9.44741	9.48696	10.2262	10.054	10.293	9.55965	9.50756	9.45303	9.82098	10.1681	9.89284	10.4782	10.6041	10.7708	9.99167	10.1446	9.9574	9.77674	9.35079	9.44069	9.46586	9.59059	9.63211	MPC1	51660	-0.541329	0.0450664	-0.435081	0.13684	-0.558753	0.0046793	-0.447478	0.0669416	-0.272723
ENSG00000100285	14318.8	-0.532004	0.0544967	-9.76213	1.63678e-22	4.55046e-20	NEFH	4744	12.4607	12.5405	12.4842	12.9717	13.0943	13.0269	13.7698	13.6424	13.6043	14.1428	13.9219	14.179	12.4548	12.4508	12.7736	13.8837	14.0479	14.0816	14.5857	14.4857	14.5556	13.4163	13.2895	13.3103	14.6148	14.1403	13.6847	14.3172	14.6742	14.567	NEFH	4744	-0.329411	0.9999	-0.218156	0.240462	-0.774059	0.142582	-0.460279	0.642404	-0.550608
ENSG00000186340	1121.18	1.01688	0.104667	9.71543	2.59147e-22	7.10984e-20	THBS2	7058	9.75037	9.53984	9.649	8.42144	8.64094	8.62917	8.9936	8.94402	9.02215	11.3192	11.2566	11.2644	11.3069	11.2928	11.1029	8.49382	8.66255	8.58722	11.0112	10.8812	10.9359	9.61592	9.50917	9.52262	9.39026	10.4381	10.5204	10.5434	9.1602	9.32995	THBS2	7058	0.465194	0.9999	0.61356	0.000240613	1.76794	0.0157648	0.343863	0.899896	1.27737
ENSG00000166478	345.152	0.758464	0.0781332	9.70733	2.80604e-22	7.59853e-20	ZNF143	7702	8.81326	8.90612	8.78781	8.31842	8.31415	8.60186	8.42697	8.39077	8.64447	9.04852	9.22538	8.82431	8.90925	9.08199	9.11373	8.27754	8.19707	8.39329	8.23485	8.34446	8.13282	8.23183	8.22626	8.12425	8.26774	9.03861	9.33824	9.12707	8.18353	8.27069	ZNF143	7702	0.246081	0.854832	0.974302	0.00358555	0.981208	1.03126e-11	0.921108	5.42575e-09	1.06588
ENSG00000164099	760.073	1.12792	0.116253	9.70225	2.94928e-22	7.88404e-20	PRSS12	8492	10.2594	10.2384	10.2146	9.35292	9.48387	9.36396	10.2306	10.0415	9.93471	9.44044	9.96935	8.71971	10.4209	10.6556	10.8297	9.18866	9.35773	9.33632	8.12125	7.47916	7.6849	9.59171	9.28588	9.82917	8.71905	9.77223	9.41507	9.7944	9.06094	8.68667	PRSS12	8492	0.839512	0.870835	0.87704	0.360159	1.12014	0.136659	1.95538	0.00502239	0.920405
ENSG00000138413	4865.29	-0.443542	0.0458589	-9.6719	3.96943e-22	1.04768e-19	IDH1	3417	12.1747	12.1531	12.252	12.8013	12.7172	12.7008	12.4525	12.3767	12.4863	11.6925	11.8639	11.6456	11.6647	11.7571	11.7861	12.8035	12.821	12.8269	12.2982	12.0273	11.9943	12.29	12.2792	12.1082	12.2304	12.0021	11.5475	12.096	12.42	12.2425	IDH1	3417	-0.376577	0.703222	-0.473535	1.98585e-05	-0.495097	0.063317	-0.383107	0.31075	-0.40543
ENSG00000166670	182.658	2.68983	0.27866	9.65271	4.78758e-22	1.24782e-19	MMP10	4319	7.64808	8.02042	7.96886	6.6312	6.44695	6.70998	6.6712	6.68192	6.86935	9.18386	8.94368	9.10245	8.90925	8.94689	8.82818	6.27712	6.67621	6.44686	6.7496	7.05917	6.918	6.32648	5.96008	5.97123	6.51122	8.76796	8.5491	9.54087	6.27156	6.11677	MMP10	4319	0.493606	0.9999	1.85637	1.13156e-17	4.17596	2.52311e-07	2.78542	0.00303456	3.8273
ENSG00000166793	296.41	0.979659	0.101867	9.61703	6.77614e-22	1.74431e-19	YPEL4	219539	8.41019	8.60231	8.58251	7.78741	8.06845	8.04013	8.2963	8.09085	7.89576	8.91473	8.7817	8.94212	9.75873	9.68905	9.29932	7.74739	7.82658	7.75771	7.88244	8.2058	8.27849	7.99572	8.38217	8.11775	7.7123	8.54665	8.61715	8.57318	7.34227	7.72075	YPEL4	219539	0.414256	0.98067	0.504654	0.137961	1.6156	8.37155e-06	0.876732	0.0881977	1.20756
ENSG00000089101	67.8163	1.37055	0.143244	9.56789	1.09106e-21	2.77434e-19	CFAP61	26074	6.95785	7.18416	6.77701	5.96521	6.42053	6.67279	6.14893	6.18251	6.32817	6.99211	7.45222	6.94504	7.37591	7.57692	7.18461	6.08741	5.87978	6.19905	6.23486	6.17458	6.28173	6.41255	6.51058	6.38093	6.84328	7.82803	7.87537	7.99234	6.85508	6.42264	CFAP61	26074	0.388443	0.9999	1.37205	0.0128137	1.57075	0.00055291	1.64322	0.00215283	1.71442
ENSG00000101670	337.85	-1.13666	0.119073	-9.54589	1.34948e-21	3.39012e-19	LIPG	9388	8.60216	8.48256	8.6321	10.2072	10.1399	10.0168	8.58706	8.49619	8.66166	7.39062	7.18596	7.01124	7.00936	6.69265	6.75744	10.0232	9.97086	9.84782	7.70095	7.54218	6.8971	7.48016	7.65588	7.23917	7.85864	7.44166	7.1492	7.37005	8.39446	7.99568	LIPG	9388	-1.50063	2.62289e-11	-1.8018	1.13483e-12	-0.962983	0.000679948	-0.31315	0.642269	-1.02454
ENSG00000155657	135.911	-1.63168	0.171154	-9.5334	1.52214e-21	3.77835e-19	TTN	7273	5.66149	5.78966	5.60554	6.39705	6.66143	6.57454	7.63496	7.47066	7.5032	6.48451	6.33256	6.52617	6.00767	5.71753	5.53741	8.44976	8.22015	8.63811	8.06963	8.32344	7.98938	6.38457	6.33837	6.38093	7.99249	7.96137	7.18611	8.07556	9.21068	8.95992	TTN	7273	-1.1394	0.183035	-1.51589	0.0161253	-1.4767	0.0175002	-2.51249	2.33163e-07	-1.21931
ENSG00000069869	311.038	0.592231	0.0622776	9.50953	1.91519e-21	4.67881e-19	NEDD4	4734	8.11422	8.06525	8.39393	7.83121	7.5335	7.67587	7.68115	7.45819	7.66224	9.35417	9.26542	9.45037	8.36039	8.44259	8.43897	7.41628	7.29108	7.5027	8.94459	8.86803	8.92313	8.16725	7.61728	7.95185	8.62447	9.23532	9.436	9.4145	8.72231	8.65988	NEDD4	4734	0.2756	0.9999	1.0687	0.00282545	0.595745	0.334149	0.492909	0.620398	0.772524
ENSG00000120709	1794.5	0.402158	0.0422935	9.50874	1.92977e-21	4.67881e-19	FAM53C	51307	11.0417	11.0176	10.9981	10.7327	10.6448	10.73	10.9903	11.0068	10.9625	10.8684	10.8907	10.6555	11.3209	11.2553	11.1649	10.6665	10.6517	10.7397	10.3802	10.441	10.3951	10.6742	10.489	10.6843	10.8527	10.977	11.2775	10.9814	10.746	10.7509	FAM53C	51307	0.315076	0.00473223	0.637779	5.73021e-05	0.652338	1.12e-16	0.415369	1.24589e-05	0.304467
ENSG00000070808	734.662	0.876548	0.0923932	9.48714	2.37453e-21	5.69095e-19	CAMK2A	815	10.0503	10.1609	9.98456	9.5531	9.51763	9.57919	9.34322	9.35528	9.42813	10.0986	10.505	9.96849	10.9787	11.0693	10.6898	8.96524	8.52158	9.02454	8.8157	8.82896	8.68972	9.94151	10.0232	10.1015	7.17831	7.81083	7.34218	7.84025	7.16305	7.05804	CAMK2A	815	0.584239	0.0229359	1.04464	8.82015e-06	0.938036	2.21182e-08	1.54951	2.93773e-20	0.773648
ENSG00000160752	2018.4	-0.753446	0.0796545	-9.45893	3.11114e-21	7.37164e-19	FDPS	2224	10.7681	10.711	10.8073	12.0515	11.9921	11.9721	11.2223	11.2349	11.0774	10.1089	10.3611	10.1814	10.1363	10.0457	9.97261	11.8313	11.9283	11.9007	10.6647	10.4034	10.308	10.9356	11.223	10.8882	10.7777	10.3523	10.0711	10.4681	10.8575	10.7388	FDPS	2224	-0.716665	1.24911e-08	-0.733641	4.30051e-07	-1.00589	3.66226e-18	-0.259909	0.209804	-0.506031
ENSG00000115762	8683.98	-0.22262	0.0235752	-9.443	3.62258e-21	8.48702e-19	PLEKHB2	55041	13.0478	13.0716	13.1163	13.4075	13.4293	13.3846	12.9402	12.9693	13.0316	13.0701	12.9456	13.0013	12.9045	12.9176	12.8741	13.1232	13.1629	13.2029	13.2533	13.2179	13.189	13.1922	13.1758	13.1098	13.0316	12.9306	12.8101	12.9768	13.0105	13.0613	PLEKHB2	55041	-0.178732	0.777717	-0.171189	0.0885368	-0.259462	0.0525503	-0.216551	0.225235	-0.130774
ENSG00000137968	497.554	0.725662	0.0769757	9.42715	4.21381e-21	9.76246e-19	SLC44A5	204962	8.86897	8.73498	8.87781	8.39276	8.38945	8.35134	9.41655	9.37483	9.46111	8.63135	8.51483	8.97011	9.4813	9.68905	9.69916	9.21512	8.73347	9.08525	7.89242	8.1431	7.69658	8.82539	8.47025	8.60427	9.16082	10.0481	9.88442	10.0187	9.50112	9.47298	SLC44A5	204962	0.43513	0.287891	0.620824	0.1233	1.09861	2.88296e-10	0.953958	6.09896e-06	0.640383
ENSG00000262406	49.9319	3.18759	0.338594	9.41422	4.7661e-21	1.09207e-18	MMP12	4321	5.17634	5.42624	5.32583	4.83516	4.83516	4.83516	5.38686	5.29878	5.17491	8.42201	7.87733	8.82869	6.27922	6.52863	6.57109	5.27656	5.17199	5.33305	6.27037	6.69527	6.64106	5.15947	4.83516	4.83516	5.85927	7.28962	6.77342	7.66331	5.61659	5.48521	MMP12	4321	0.183694	0.9999	0.777499	0.204109	6.41602	0.0114436	2.67447		3.4159
ENSG00000012660	3207.46	-0.440639	0.0468455	-9.40622	5.14322e-21	1.16567e-18	ELOVL5	60481	11.403	11.2134	11.5046	12.0464	12.0213	11.9712	11.5199	11.5007	11.6543	11.4468	11.4716	11.4563	11.103	11.0902	11.2342	12.2359	12.1809	12.1802	11.7266	11.7028	11.5379	11.5599	11.561	11.4076	11.8243	11.5884	11.4585	11.6788	11.9855	11.9059	ELOVL5	60481	-0.644205	7.33037e-07	-0.578418	2.05156e-07	-0.372218	0.00846617	-0.205345	0.373856	-0.336743
ENSG00000175224	1954.6	0.229787	0.0247379	9.28889	1.55902e-20	3.4954e-18	ATG13	9776	11.0721	11.1136	11.0284	10.8618	10.8583	10.8426	11.0022	10.9505	10.9509	10.982	11.0706	11.0597	11.0091	11.0411	10.9936	10.8619	10.8456	10.8186	10.89	10.7177	10.9041	10.7096	10.6569	10.7059	11.0762	11.2362	11.3597	11.2563	11.0385	11.0289	ATG13	9776	0.132624	0.636757	0.205774	0.285274	0.337284	8.35654e-07	0.202259	0.0288261	0.238347
ENSG00000139318	1263.79	0.466144	0.0505071	9.22928	2.72461e-20	6.04371e-18	DUSP6	1848	10.7277	10.6498	10.81	10.375	10.2544	10.0756	9.39857	9.51356	9.64167	10.4069	10.4797	10.4485	11.1649	11.0789	11.0674	9.27919	9.24681	9.35917	10.052	9.77874	9.79226	10.5736	10.6346	10.457	10.3572	10.4141	10.8672	10.6889	10.161	10.361	DUSP6	1848	0.253725	0.692206	0.235743	0.417488	0.568418	1.90643e-05	0.592792	5.29377e-05	0.381892
ENSG00000149809	2941.24	-0.58859	0.0638109	-9.22398	2.86278e-20	6.28335e-18	TM7SF2	7108	11.3473	11.5913	11.3748	12.193	12.1885	12.1846	11.4788	11.5581	11.5162	11.1011	11.1443	10.9317	11.0152	10.847	10.8873	12.1097	12.317	12.205	11.5193	10.9933	11.2133	11.3779	11.7634	11.4498	11.6331	11.0237	10.8139	11.2574	11.8077	11.5284	TM7SF2	7108	-0.700678	1.95156e-05	-0.540586	0.00183385	-0.63411	5.17456e-05	-0.202747	0.551189	-0.633835
ENSG00000103018	2353.3	-0.344893	0.0376401	-9.16292	5.05135e-20	1.09714e-17	CYB5B	80777	11.2036	11.1199	11.2519	11.6361	11.6492	11.5868	11.1624	11.2322	11.2351	11.0276	10.9186	10.9408	10.7844	10.8236	10.8303	11.7496	11.6959	11.7485	11.157	11.0818	10.9974	11.1402	11.1984	11.0734	11.2604	11.0174	10.8953	11.1399	11.3931	11.2754	CYB5B	80777	-0.526157	5.76094e-11	-0.12218	0.634076	-0.331449	0.00010034	-0.121178	0.485733	-0.299761
ENSG00000125848	481.71	0.725825	0.0792401	9.15983	5.19802e-20	1.11736e-17	FLRT3	23767	9.28811	9.11075	9.21869	8.59498	8.63065	8.7666	9.40759	9.32209	9.47732	9.22524	9.12448	8.93807	8.83036	8.89887	8.98669	9.05956	8.83117	9.0435	8.37576	8.2058	8.3965	8.03658	7.7744	7.64096	9.40889	9.66012	10.1483	9.69941	9.39605	9.46866	FLRT3	23767	0.469851	0.703222	0.402952	0.537114	1.29598	3.06591e-06	0.885329	0.00771191	0.453275
ENSG00000261604	570.318	-1.0412	0.113701	-9.15734	5.31943e-20	1.13179e-17	NA	NA	9.17229	9.22867	9.62785	11.0121	10.9361	10.7964	9.256	9.18848	9.12463	7.82979	7.49424	7.3881	7.93635	7.72579	7.6661	9.87995	9.75796	9.77328	8.11278	8.11885	7.5877	9.22972	9.26152	8.63632	9.01015	8.5726	8.36182	8.65727	9.43854	9.3129	NA	NA	-0.661437	0.0563412	-1.01653	0.000235539	-1.52751	3.00829e-12	-0.48939	0.240727	-0.823559
ENSG00000184207	1140.61	-0.520367	0.0571108	-9.11154	8.12197e-20	1.71062e-17	PGP	283871	9.70113	9.85229	9.63997	10.2926	10.2189	10.3162	10.2682	10.3485	10.4385	10.1457	10.0379	9.99008	9.88212	9.69939	9.79199	10.7658	11.0552	10.7134	10.5121	10.3022	10.4469	10.2262	10.3344	10.5412	10.2264	9.78411	9.3883	10.0041	10.3993	10.068	PGP	283871	-0.512251	0.00247399	-0.722378	0.000903338	-0.608997	1.51426e-05	-0.382191	0.0389527	-0.519279
ENSG00000167207	31.2155	1.48788	0.164218	9.06042	1.29945e-19	2.70948e-17	NOD2	64127	6.72114	6.68084	6.88948	6.18354	6.5228	6.18993	6.45893	6.40306	6.53675	6.33561	6.14545	5.81649	6.63009	6.84879	6.7198	5.7593	5.77342	5.97847	5.6639	4.83516	5.52058	5.79247	5.69446	5.77044	6.08973	6.48256	6.47094	6.76134	6.03754	5.83087	NOD2	64127	1.5033		1.49542		2.26104		2.17745		1.27964
ENSG00000002587	632.147	-0.49742	0.0555548	-8.9537	3.43776e-19	7.09711e-17	HS3ST1	9957	9.43266	9.54298	9.34635	9.83856	9.81317	9.74996	8.80814	8.55475	8.57963	9.41592	9.40455	9.58556	8.66673	8.56456	8.74328	8.96524	9.06881	8.92581	10.3556	10.176	10.3648	8.95783	9.07134	9.07702	9.7269	9.33739	9.15401	9.49997	9.68833	9.69015	HS3ST1	9957	-0.385946	0.0982804	-0.467724	0.104561	-0.424199	0.00297678	-0.882986	3.75665e-14	-0.395559
ENSG00000063176	1719.22	-0.351995	0.0393327	-8.94916	3.58209e-19	7.32257e-17	SPHK2	56848	10.4201	10.5348	10.3049	10.772	10.691	10.7974	10.5745	10.8839	10.7105	10.9186	10.848	10.8024	10.2473	10.2564	10.3995	10.9111	11.0509	11.0904	11.2931	11.0777	11.183	10.5899	10.6487	10.8528	11.0611	10.7477	10.5486	10.7745	11.1229	10.9482	SPHK2	56848	-0.292588	0.377067	-0.416001	0.0258108	-0.412135	0.00519256	-0.340649	0.0597231	-0.365672
ENSG00000142188	1180.45	-0.354985	0.039691	-8.9437	3.76364e-19	7.61899e-17	TMEM50B	757	10.1617	10.1341	10.2722	10.4803	10.5228	10.5474	10.2658	10.0677	10.2477	9.93016	9.87171	10.0604	9.73867	9.78788	9.82394	10.4502	10.4933	10.4555	10.2882	10.4792	10.2721	10.2332	10.4599	10.2024	10.5458	10.2603	10.2565	10.3657	10.4813	10.4673	TMEM50B	757	-0.281192	0.0144047	-0.324367	0.22038	-0.545758	1.83045e-12	-0.41402	4.45489e-06	-0.215663
ENSG00000071242	11075.7	-0.31725	0.0354789	-8.94191	3.82495e-19	7.66865e-17	RPS6KA2	6196	13.5961	13.5549	13.6002	13.945	13.9561	13.9141	13.7205	13.6774	13.7472	12.9819	12.9648	12.8292	12.7716	12.7594	12.8143	13.8699	13.9171	14.0032	13.4991	13.0979	13.2201	13.2148	13.0199	13.1638	13.4441	13.1966	12.9902	13.292	13.4838	13.4657	RPS6KA2	6196	-0.211777	0.766992	-0.15932	0.527766	-0.352367	0.0192157	-0.359127	0.0342117	-0.303546
ENSG00000104812	1852.09	-0.306314	0.0342645	-8.93969	3.90256e-19	7.74975e-17	GYS1	2997	10.7373	10.6599	10.6649	10.8631	10.7852	10.9078	10.9446	10.9429	10.8942	10.8421	10.7709	10.7085	10.4801	10.3864	10.4862	11.0486	11.3962	11.1839	11.3198	11.0725	11.2083	10.6945	10.7538	10.7964	11.108	10.8015	10.8049	10.8462	11.1142	11.1349	GYS1	2997	-0.291884	0.282918	-0.553285	8.82015e-06	-0.305326	0.0392603	-0.442329	0.00219919	-0.313677
ENSG00000184261	517.767	0.772259	0.0864195	8.93617	4.02899e-19	7.92533e-17	KCNK12	56660	10.106	10.2538	10.1798	9.69123	9.8423	9.68881	9.14705	9.34541	9.29173	9.18063	8.96818	8.85038	9.77195	9.64997	9.26731	8.80447	8.98648	9.11691	8.34002	8.35139	8.45882	8.2936	8.30635	8.5233	7.8262	8.65727	8.63835	8.7979	7.99884	7.77234	KCNK12	56660	0.328639	0.837246	0.511335	0.0352939	1.35151	3.7303e-11	0.714119	0.00811334	0.997796
ENSG00000164283	10.7127	3.24851	0.363594	8.93443	4.09277e-19	7.97554e-17	ESM1	11082	5.51287	5.51613	5.74252	4.83516	4.83516	4.83516	4.83516	5.29878	5.17491	5.91894	5.80682	5.90623	6.7733	6.80277	6.66778	4.83516	5.17199	4.83516	5.51486	4.83516	5.52058	5.15947	5.14289	5.13558	5.25367	5.76555	5.85203	5.98342	5.23962	5.20498	ESM1	11082	1.54068		1.13276	0.0607072	5.45195		1.84947		2.81276
ENSG00000220773	109.308	0.88739	0.0993367	8.93315	4.14048e-19	7.99381e-17	RPSAP44	652411	8.18018	7.95516	8.19316	7.64706	7.30108	7.77002	6.82374	6.53792	6.91042	7.15237	7.53501	7.43594	8.15202	8.44259	8.01283	6.62427	6.65206	6.44686	6.7496	6.89009	6.58826	7.23038	7.07112	7.32265	6.36213	6.89372	6.91116	7.05574	6.48044	6.46209	RPSAP44	652411	0.332703	0.9999	0.651554	0.204109	1.33003	0.00112638	0.978418	0.0912224	0.918262
ENSG00000109971	41675.3	-0.296829	0.0332525	-8.92649	4.39722e-19	8.41159e-17	HSPA8	3312	15.1903	15.2559	15.3145	15.6159	15.6005	15.5094	15.2207	15.2973	15.3418	15.0837	15.1949	15.0911	15.0543	15.059	15.1694	15.3756	15.4849	15.5484	15.6018	15.4509	15.3415	15.3849	15.5792	15.3701	15.5646	15.1751	15.0995	15.3113	15.4365	15.4265	HSPA8	3312	-0.179304	0.78382	-0.249123	0.000164629	-0.350006	0.00459913	-0.346512	0.0116393	-0.282926
ENSG00000268089	1177.06	-0.69874	0.078627	-8.88677	6.29129e-19	1.19254e-16	GABRQ	55879	9.58828	9.77164	9.70488	10.6539	10.7829	10.7671	10.283	10.205	10.1132	9.89318	10.0099	9.69962	10.3407	10.3624	10.7408	10.9636	11.037	11.1657	10.6719	10.2368	10.0797	10.9818	10.7505	10.8411	9.00811	8.69653	8.23106	8.74987	9.15963	9.2398	GABRQ	55879	-0.882958	0.175174	-0.956131	7.84328e-07	-0.377046	0.505934	-0.505505	0.477061	-0.63459
ENSG00000272031	636.537	-0.498556	0.0561623	-8.87706	6.86493e-19	1.28956e-16	ANKRD34A	284615	9.02419	9.21691	9.20651	9.5723	9.41985	9.61591	9.21031	9.63199	9.46437	9.39656	9.53467	9.43613	8.50755	8.72995	8.8364	9.82527	9.93672	9.9984	10.052	9.80908	10.0487	9.08292	9.1094	9.2698	9.48453	9.19129	8.72014	9.17392	9.59481	9.39618	ANKRD34A	284615	-0.499333	0.0229053	-0.665531	0.00324835	-0.514517	0.00362916	-0.556305	0.00240611	-0.493925
ENSG00000198785	2141.85	-0.69276	0.078265	-8.85146	8.6379e-19	1.60811e-16	GRIN3A	116443	11.8411	11.8525	11.8971	12.4339	12.414	12.3337	11.8888	11.8142	11.9844	9.30754	9.43995	9.17293	9.36389	9.2403	8.8554	12.3196	12.0492	12.333	10.4928	9.96093	9.91518	10.1306	9.91819	9.88336	8.77773	8.55039	8.37314	8.06852	9.14124	9.24262	GRIN3A	116443	-0.342018	0.9999	-0.848088	0.00204188	-0.873634	0.229754	-0.897289	0.335011	-0.833643
ENSG00000112232	290.763	-0.488772	0.0552378	-8.8485	8.87007e-19	1.63672e-16	KHDRBS2	202559	8.36141	8.28543	8.20965	8.5503	8.63065	8.58801	7.95524	7.78064	7.98108	8.42201	8.10842	8.08175	8.51705	8.35506	8.43173	8.16592	8.1736	8.39329	8.85156	8.84863	8.56329	9.05561	8.94305	8.97712	8.53458	8.03166	8.07487	8.2349	8.32246	8.46552	KHDRBS2	202559	-0.415936	0.334151	-0.648138	0.183867	-0.633921	9.93188e-05	-0.641008	0.000916889	-0.395734
ENSG00000073578	5058.44	-0.259549	0.0294272	-8.82004	1.14419e-18	2.09276e-16	SDHA	6389	11.8809	11.9584	11.8832	12.2246	12.0732	12.1494	12.2964	12.3625	12.3558	12.4168	12.3678	12.3899	11.9167	11.9161	12.0905	12.5221	12.6013	12.5665	12.6928	12.5397	12.6228	12.1992	12.3931	12.3648	12.5028	12.3182	12.1043	12.3474	12.5161	12.4922	SDHA	6389	-0.22238	0.703874	-0.154688	0.490686	-0.345906	0.020466	-0.231849	0.29184	-0.248097
ENSG00000147121	415.237	0.333527	0.0378239	8.81789	1.16641e-18	2.11486e-16	KRBOX4	55634	9.26191	9.34486	9.2507	8.91463	9.03675	8.8501	8.84853	8.87693	8.75532	8.79283	8.82529	8.79328	9.08724	9.10888	8.96188	8.70044	8.55815	8.58073	8.41063	8.52078	8.33872	8.70483	8.73278	8.79066	8.90378	9.07138	9.08638	9.08327	8.71688	8.84139	KRBOX4	55634	0.247356	0.950595	0.482406	0.352084	0.35339	0.147385	0.435703	0.136199	0.285518
ENSG00000172071	669.704	0.883061	0.100263	8.80749	1.27977e-18	2.30038e-16	EIF2AK3	9451	9.4918	9.64879	9.56882	8.87902	8.98532	8.97928	9.21546	9.14736	9.1812	10.0588	9.71013	10.0678	10.0768	10.0399	9.63951	9.07047	8.95946	9.13469	8.99581	9.22069	9.24218	8.53399	8.35927	8.65432	9.3154	10.2025	10.6074	10.3256	9.30352	9.33945	EIF2AK3	9451	0.14266	0.9999	1.06691	4.56793e-07	1.56167	4.70371e-26	0.861876	1.93851e-07	1.13255
ENSG00000271815	76.3689	-1.02586	0.116821	-8.78149	1.61325e-18	2.87504e-16	NA	NA	6.57029	6.75278	6.6792	7.85261	7.83551	7.79463	7.05937	6.76933	6.84831	6.36181	6.14545	6.22986	6.05116	6.15054	6.07517	7.39268	7.29108	7.86958	6.77266	6.67163	6.24598	6.86718	6.6405	6.42864	7.37826	6.85275	6.85698	7.003	7.43245	7.28383	NA	NA	-0.954909	0.0290005	-1.57382	0.0946165	-1.15824	0.00221874	-0.666114	0.301368	-0.697113
ENSG00000160326	2173.78	-0.398945	0.0455525	-8.75791	1.98901e-18	3.51465e-16	SLC2A6	11182	10.8767	10.9424	10.7664	11.2619	11.2554	11.2125	11.3042	11.4799	11.392	10.809	10.7751	10.7733	10.5652	10.5841	10.6898	11.732	11.8914	11.7507	11.0966	10.9406	11.0894	10.9206	11.1313	11.1071	11.2203	10.8938	10.4536	10.9746	11.3827	11.1289	SLC2A6	11182	-0.400757	0.00121183	-0.490413	0.00170935	-0.453482	2.24996e-05	-0.267026	0.071722	-0.470184
ENSG00000164509	42.5882	1.66337	0.190327	8.73954	2.34071e-18	4.10136e-16	IL31RA	133396	6.87676	7.00554	7.17802	6.01289	6.33742	6.03539	5.8524	6.03242	5.88848	6.65764	6.55118	6.87526	7.51798	7.6409	6.85262	5.14789	5.41597	5.44346	6.65285	6.31249	6.58826	6.32648	6.3115	6.10561	5.57821	6.47822	6.72239	6.57829	5.70179	5.68268	IL31RA	133396	2.25545	0.327303	1.72657	0.00212284	1.94109	0.0232462	0.320084		2.33133
ENSG00000120278	420.283	0.687451	0.0786971	8.73541	2.42774e-18	4.2184e-16	PLEKHG1	57480	9.48858	9.13179	9.1007	8.53071	8.59935	8.64709	8.1415	8.16068	7.9055	9.72831	9.73028	9.82729	9.15349	9.05689	8.67153	7.72886	7.53577	7.73422	9.05407	9.23941	9.05402	8.13757	8.04386	8.3461	8.80932	9.06814	9.69759	8.97285	8.68064	8.87813	PLEKHG1	57480	0.521392	0.929769	0.189428	0.699374	0.926798	0.0476942	0.698247	0.287135	0.539862
ENSG00000254858	600.757	-0.520244	0.0599833	-8.67315	4.20312e-18	7.24291e-16	MPV17L2	84769	8.96967	9.0721	9.03785	9.69416	9.66295	9.63393	8.9694	9.27083	9.21255	9.04141	9.17161	8.98195	8.60873	8.64351	8.72568	9.80802	9.99539	10.0129	9.50301	9.16696	9.35155	9.07128	9.09567	9.10992	9.73225	9.38453	9.32455	9.59891	9.85818	9.5631	MPV17L2	84769	-0.83814	1.10741e-05	-0.673171	0.0222272	-0.485499	0.0192052	-0.310939	0.324672	-0.306744
ENSG00000154096	9657.99	-0.350273	0.0404128	-8.66738	4.42159e-18	7.55693e-16	THY1	7070	13.2735	13.2868	13.2046	13.676	13.6396	13.5402	13.5508	13.6782	13.6034	12.8427	12.8708	12.6624	12.419	12.4028	12.5034	13.8397	13.9671	13.9651	13.2068	13.0107	13.0432	12.7722	12.9529	12.9092	13.3022	13.0565	12.628	13.1002	13.3461	13.1678	THY1	7070	-0.309734	0.0844766	-0.173165	0.330984	-0.438436	0.000162472	-0.298292	0.0445828	-0.334303
ENSG00000153395	5106.35	-0.355435	0.0411113	-8.64568	5.34836e-18	9.06656e-16	LPCAT1	79888	12.2668	12.2618	12.1567	12.7816	12.719	12.7185	12.1201	12.1477	12.2258	12.1145	12.0092	12.1912	12.1122	12.1224	12.2003	12.5695	12.5552	12.6273	12.4831	12.2411	12.25	12.4739	12.4077	12.4166	12.3404	12.1346	11.8175	12.2142	12.5254	12.2808	LPCAT1	79888	-0.418623	0.0169846	-0.117147	0.679563	-0.287489	0.0723451	-0.226239	0.319003	-0.326424
ENSG00000015592	6291.84	0.83052	0.0961432	8.63837	5.70219e-18	9.51171e-16	STMN4	81551	13.4004	13.533	13.4553	13.1386	13.0828	13.158	12.6744	12.7314	12.7798	12.7913	12.782	12.5635	13.5431	13.3918	13.0085	12.4005	12.3455	12.4668	11.6358	11.5063	11.394	11.7411	12.0808	11.7856	11.4572	12.1803	12.0233	12.3134	11.4144	11.2743	STMN4	81551	0.332127	0.216043	0.753196	1.61258e-07	1.47101	1.00366e-34	1.21505	1.91393e-22	0.803429
ENSG00000100027	305.369	0.682125	0.0789601	8.63885	5.67797e-18	9.51171e-16	YPEL1	29799	9.32473	9.11075	9.19832	8.90455	8.82796	8.8149	8.6945	8.58314	8.74462	8.12992	8.23572	7.99016	9.25879	9.23014	8.94425	8.45534	8.43242	8.52095	7.50532	7.45312	7.3096	8.33985	8.16142	8.17525	7.65696	8.00314	8.33604	8.0084	7.4188	7.41503	YPEL1	29799	0.243464	0.98067	0.569716	0.225795	1.06822	7.45851e-08	0.904482	0.000493113	0.798121
ENSG00000130956	2109.82	-0.365658	0.0424193	-8.62008	6.69055e-18	1.09846e-15	HABP4	22927	10.8355	10.9064	10.8996	11.5314	11.5441	11.3878	10.8569	10.8975	10.8674	11.0366	10.8792	10.8472	10.7381	10.618	10.602	11.159	11.3572	11.2576	11.2603	11.2085	11.2282	10.9704	10.9643	11.0105	11.323	11.111	10.9177	11.1912	11.1661	11.2495	HABP4	22927	-0.391489	0.382289	-0.272343	0.0536092	-0.335183	0.155234	-0.318724	0.304673	-0.176356
ENSG00000086061	10016.6	-0.246798	0.0286297	-8.62035	6.67474e-18	1.09846e-15	DNAJA1	3301	13.4071	13.4416	13.4902	13.7579	13.6949	13.7135	13.3587	13.3937	13.4234	12.9853	13.0576	12.9599	13.097	13.0946	13.1448	13.5566	13.5656	13.574	13.3215	13.16	13.1634	13.4236	13.5566	13.4332	13.0304	12.8273	12.6216	12.908	13.004	12.9435	DNAJA1	3301	-0.169262	0.98067	-0.224068	0.0819969	-0.358984	0.0449319	-0.218298	0.467487	-0.206505
ENSG00000132305	3360.06	-0.186924	0.0217134	-8.6087	7.38965e-18	1.20376e-15	IMMT	10989	11.6441	11.6587	11.6936	11.9048	11.9366	11.8775	11.7506	11.7124	11.8075	11.6037	11.5489	11.6169	11.3889	11.4316	11.48	11.9593	11.9547	11.9758	11.8363	11.736	11.7026	11.6736	11.6309	11.6477	11.8377	11.7188	11.6748	11.8176	11.8527	11.8431	IMMT	10989	-0.204296	0.0904485	-0.299097	0.0165817	-0.21778	0.00776629	-0.173331	0.105109	-0.111022
ENSG00000172432	2325.05	0.394065	0.0458441	8.59576	8.27133e-18	1.33694e-15	GTPBP2	54676	11.0095	11.1314	11.0893	10.8513	10.7747	10.8986	10.9676	11.083	10.9625	11.5862	11.7132	11.608	11.4762	11.5108	11.653	10.903	10.9416	10.809	11.0827	11.0086	11.062	10.9494	10.9969	11.245	11.2383	11.6154	11.6292	11.6359	11.1036	11.076	GTPBP2	54676	0.12855	0.791477	0.550355	0.000256723	0.491805	4.05344e-12	0.596172	1.80448e-16	0.492227
ENSG00000180155	4055.81	-0.511098	0.0595061	-8.58899	8.77361e-18	1.40722e-15	LYNX1	66004	11.8505	11.9312	11.7309	12.5661	12.5106	12.5775	12.57	12.5977	12.6351	11.8119	11.5754	11.6456	9.91823	9.87646	9.79199	13.0162	13.225	13.1332	12.0714	11.9387	11.9241	10.3011	10.3546	10.3207	11.8804	11.5966	10.9146	11.7136	12.1088	11.8541	LYNX1	66004	-0.525327	0.382289	-0.365416	0.0039481	-0.484192	0.123955	-0.304732	0.581723	-0.512137
ENSG00000133069	2365.44	-0.338383	0.039422	-8.58361	9.19415e-18	1.46341e-15	TMCC2	9911	11.1718	11.2271	11.0501	11.5557	11.6269	11.5146	11.3458	11.4146	11.4332	10.8543	10.7528	10.747	11.1614	11.0452	11.117	11.5457	11.7623	11.6965	11.211	11.0797	11.128	11.3958	11.4095	11.5308	11.0559	10.8787	10.5039	10.962	11.1418	11.021	TMCC2	9911	-0.271659	0.0574517	-0.488095	0.00085047	-0.342835	0.000479608	-0.366263	0.000761172	-0.288424
ENSG00000176490	4587.18	-0.361809	0.0422118	-8.57126	1.02356e-17	1.61683e-15	DIRAS1	148252	11.8779	12.0154	11.9625	12.4573	12.3888	12.3216	11.4841	11.6696	11.6643	12.1704	12.0204	12.0578	12.3389	12.2365	12.1623	11.9217	11.9044	11.889	12.4643	12.4245	12.4456	12.6797	12.7426	12.7042	12.2252	12.0688	11.6148	12.1423	12.2165	12.1415	DIRAS1	148252	-0.296503	0.896309	-0.366844	2.3482e-05	-0.462832	0.085792	-0.36636	0.337172	-0.238998
ENSG00000151117	377	0.448069	0.0522812	8.57037	1.03155e-17	1.61721e-15	TMEM86A	144110	8.71714	8.72392	8.45731	8.43557	8.4783	8.42604	8.70921	8.59992	8.72296	8.95695	9.14609	9.14515	8.60576	8.56131	8.58626	8.36329	8.42583	8.58722	8.52318	8.28772	8.48566	8.20349	8.07241	8.20008	9.18145	9.49867	9.46585	9.50428	8.95034	9.03012	TMEM86A	144110	0.257347	0.992508	0.801133	0.00143246	0.508593	0.113719	0.740311	0.0194131	0.470999
ENSG00000138772	72.2541	0.995599	0.116754	8.52733	1.4976e-17	2.33033e-15	ANXA3	306	7.7611	7.78277	7.69	7.11176	7.35341	7.10127	6.56974	6.3741	6.53675	7.23226	7.52156	7.32582	7.61714	7.63464	7.19347	6.15452	6.43926	5.92772	6.83941	6.89009	6.83226	6.61511	6.73912	6.58182	5.68359	6.00328	6.18028	6.41706	5.81045	5.66327	ANXA3	306	0.625729	0.98067	0.879288	0.0536	1.3227	0.0176067	0.776397	0.391478	1.3351
ENSG00000224032	859.324	0.312793	0.0366877	8.52583	1.51724e-17	2.34341e-15	NA	NA	9.92016	9.99434	10.0081	9.46337	9.57753	9.44786	9.32905	9.65348	9.6214	10.2262	10.238	10.2101	10.1676	10.1741	10.1778	9.37611	9.51111	9.30527	10.0432	9.88463	9.96345	9.7361	9.86063	9.91901	9.63541	9.86917	9.93553	9.8439	9.57013	9.68395	NA	NA	0.163586	0.980396	0.484075	0.23159	0.354016	0.0203486	0.272048	0.195449	0.265868
ENSG00000095370	997.901	0.737317	0.0865353	8.52042	1.5898e-17	2.43743e-15	SH2D3C	10044	10.5753	10.5858	10.388	10.279	10.1108	10.0968	10.0265	10.223	10.1256	10.3068	10.3426	10.0604	10.9951	10.8959	10.6282	9.85076	9.75273	10.0153	9.36837	9.13932	9.23432	9.61057	9.57733	9.63297	9.23178	9.81959	9.61655	9.82885	9.17271	8.95305	SH2D3C	10044	0.27129	0.802206	0.74518	0.000926483	1.30649	4.26139e-17	1.05948	5.19093e-10	0.686128
ENSG00000135414	3100.03	-0.299635	0.0351746	-8.5185	1.61628e-17	2.45994e-15	GDF11	10220	11.4073	11.4296	11.4176	11.8502	11.8544	11.878	11.6574	11.7521	11.7901	10.746	10.7013	10.5391	10.7361	10.6404	10.683	11.9878	11.9972	12.0842	11.1271	10.7942	10.6856	10.9152	10.8889	11.0157	12.4423	12.2095	12.2373	12.1811	12.4736	12.4987	GDF11	10220	-0.28866	0.628179	-0.154511	0.544903	-0.258911	0.239916	-0.225299	0.49816	-0.269056
ENSG00000116717	1365.49	0.691345	0.0812897	8.50471	1.82052e-17	2.7507e-15	GADD45A	1647	10.2893	10.4604	10.3219	9.75423	9.59345	9.68233	9.71779	9.77119	9.88214	11.3668	11.3366	11.3958	10.9649	10.8276	10.8283	9.86751	9.96184	9.78175	10.4114	10.5103	10.5389	9.7361	9.85861	9.89848	10.3831	10.9966	10.9695	11.1987	10.3201	10.1997	GADD45A	1647	-0.079829	0.9999	0.841803	0.000120829	1.09264	9.35281e-17	0.903786	4.44911e-11	0.779346
ENSG00000127955	12734.5	-0.413294	0.0486171	-8.50099	1.87978e-17	2.8198e-15	GNAI1	2770	13.3251	13.4145	13.5568	13.874	13.9182	13.7937	13.829	13.7388	13.7974	12.7453	12.6066	12.8944	11.8809	11.8567	11.8676	14.113	14.1403	14.1511	13.5518	13.4847	13.405	12.269	12.1511	12.1651	14.6248	14.2998	14.3122	14.2075	14.241	14.6098	GNAI1	2770	-0.34252	0.0883786	-0.409229	1.66202e-07	-0.328699	0.0245971	-0.734319	1.58478e-09	-0.233078
ENSG00000134824	6200.37	-0.54217	0.0638424	-8.49233	2.0254e-17	3.01655e-15	FADS2	9415	12.7309	12.6662	12.6328	13.5018	13.4269	13.4032	12.8824	13.0104	13.0433	11.5265	11.5087	11.2094	11.847	11.7046	11.6178	13.5757	13.6434	13.6951	11.9174	11.5406	11.2919	12.159	12.2648	12.0472	12.5025	12.0407	11.7443	12.0965	12.7643	12.5144	FADS2	9415	-0.657349	0.00287113	-0.80542	2.864e-10	-0.436751	0.0451158	-0.189547	0.697384	-0.639564
ENSG00000139438	706.499	-0.368656	0.0434224	-8.48999	2.06654e-17	3.05599e-15	FAM222A	84915	9.71498	9.80078	9.81053	10.0834	10.041	9.94288	9.03498	9.22127	9.41808	9.34266	9.24153	9.29799	9.55812	9.51595	9.47421	9.29787	9.51729	9.41476	9.76919	9.60512	9.76799	10.0121	9.91234	10.1306	9.42678	9.10405	8.9679	9.01283	9.28898	9.38246	FAM222A	84915	-0.182672	0.872159	-0.688226	0.0024115	-0.535834	3.22517e-06	-0.455722	0.0011491	-0.37509
ENSG00000188229	10649.3	0.295017	0.0347738	8.48387	2.17817e-17	3.19838e-15	TUBB4B	10383	13.5737	13.651	13.5825	13.3028	13.233	13.2507	13.7216	13.8036	13.8229	13.5341	13.5213	13.4307	13.3184	13.2757	13.3624	13.2818	13.4768	13.4968	13.3645	13.0221	13.2021	13.0275	13.2696	13.09	13.0871	13.3747	13.3037	13.4847	13.1872	13.0334	TUBB4B	10383	0.368519	0.00951422	0.535713	2.3482e-05	0.190738	0.196885	0.293288	0.0435939	0.284108
ENSG00000109084	2026.8	-1.09587	0.129255	-8.47838	2.28347e-17	3.32955e-15	TMEM97	27346	10.4251	10.5613	10.7158	12.3846	12.3774	12.2509	10.9243	10.7583	10.9451	10.0051	10.0028	9.85109	9.12282	9.11109	9.25512	12.3741	12.4016	12.249	10.6166	10.0205	9.82921	10.1998	10.411	9.95198	10.7252	10.1989	9.88148	10.4085	11.1852	10.9	TMEM97	27346	-1.48846	7.16642e-16	-1.37741	3.62209e-15	-1.10837	6.90712e-09	-0.255597	0.567125	-0.801299
ENSG00000173599	1066.16	-0.439641	0.0520258	-8.45043	2.90235e-17	4.20256e-15	PC	5091	9.97641	9.85482	9.68747	10.5237	10.5352	10.5162	10.1763	10.1246	10.3033	9.74808	9.7445	9.61367	8.87773	8.87294	9.02552	10.6867	10.7361	10.679	10.0299	9.76074	9.90533	9.4129	9.50139	9.41366	10.6392	10.5049	10.3433	10.4996	10.7246	10.6025	PC	5091	-0.513287	0.000482	-0.270414	0.161176	-0.566875	3.04659e-05	-0.214203	0.373856	-0.215797
ENSG00000143195	285.632	0.546451	0.0646954	8.44652	3.00111e-17	4.31559e-15	ILDR2	387597	9.18828	8.94945	9.06962	8.67443	8.64605	8.74597	8.40902	8.43513	8.25601	8.27129	8.2194	8.02905	8.32832	8.37745	7.98824	8.32106	8.1736	8.24481	7.75683	7.61419	7.63715	7.71179	7.5052	7.4859	8.39127	8.84209	9.00004	8.99636	8.38173	8.39097	ILDR2	387597	0.148367	0.9999	0.27668	0.559755	0.85914	0.00206836	0.640424	0.0825147	0.640817
ENSG00000260630	372.042	-0.616227	0.0730831	-8.43187	3.40171e-17	4.85815e-15	SNAI3-AS1	197187	7.98156	8.41525	8.46418	9.17998	9.00929	9.14885	8.22616	8.44755	8.49899	8.52285	8.33749	8.30674	8.26569	8.12258	8.22518	8.66721	8.79084	8.75216	8.70241	8.87763	8.61278	8.78315	9.00312	8.77432	9.09516	8.93198	8.5701	8.96972	9.53846	9.42521	SNAI3-AS1	197187	-0.387979	0.719465	-0.668543	0.0420186	-0.758725	0.00136697	-0.399813	0.304872	-0.588586
ENSG00000147155	1109.15	-0.593645	0.0706362	-8.40426	4.30584e-17	6.10756e-15	EBP	10682	9.75037	10.008	9.95818	10.8461	10.7944	10.8685	10.0838	10.2176	10.3462	9.71275	9.85608	9.6536	9.76536	9.6051	9.58865	10.8556	10.9519	10.7484	10.0209	9.88701	9.63716	10.1473	10.4248	10.0278	10.2443	9.76984	9.42591	9.80947	10.3504	10.1784	EBP	10682	-0.653391	9.96948e-05	-0.6575	0.0181343	-0.584723	0.000228944	-0.12418	0.809513	-0.616628
ENSG00000177875	5347.89	-0.369731	0.0440625	-8.39106	4.8179e-17	6.78771e-15	CCDC184	387856	12.7272	12.7565	12.6411	13.0277	13.0225	13.0162	12.4606	12.6463	12.6662	11.7071	11.5367	11.5157	12.2357	12.2171	12.2853	12.8146	12.9271	12.9619	12.0714	11.8078	11.8159	12.752	12.9278	12.8392	11.7861	11.5143	11.1635	11.5384	11.7112	11.6317	CCDC184	387856	-0.3061	0.703874	-0.541519	0.000112939	-0.597709	0.00189473	-0.32122	0.292958	-0.303297
ENSG00000134253	165.67	0.575478	0.068894	8.35309	6.6502e-17	9.30627e-15	TRIM45	80263	7.7611	7.72774	7.62933	7.3759	7.36619	7.68469	7.97991	8.00053	7.72991	7.84642	7.73419	7.84924	8.47541	8.33612	8.31065	7.72886	7.68878	7.41599	7.3078	7.51732	7.3401	7.48016	7.66537	7.68605	7.64988	7.96137	8.03431	8.00717	7.50237	7.49467	TRIM45	80263	0.374809	0.731838	0.819668	0.150726	0.95851	3.52009e-06	0.564372	0.0754014	0.581764
ENSG00000100418	2630.18	-0.233581	0.0279749	-8.34968	6.84507e-17	9.5151e-15	DESI1	27351	11.3623	11.3233	11.3766	11.5645	11.553	11.6102	11.3941	11.4625	11.4579	11.2684	11.2763	11.2748	10.9798	11.0573	10.9979	11.5208	11.5289	11.5831	11.719	11.5682	11.5718	11.2627	11.3372	11.1831	11.4581	11.2941	11.1303	11.3332	11.49	11.4737	DESI1	27351	-0.102296	0.97092	-0.161948	0.292755	-0.253549	0.00894309	-0.356944	0.00016187	-0.22602
ENSG00000105204	1166.44	0.328486	0.0394632	8.32385	8.5152e-17	1.17583e-14	DYRK1B	9149	10.324	10.42	10.1798	10.1143	9.98177	10.0822	10.2682	10.4238	10.3231	10.2387	10.4207	10.2594	10.3792	10.3493	10.494	10.0601	10.1162	10.1214	9.81389	9.76074	9.84218	9.95632	10.0014	10.0701	10.4921	10.5548	10.7383	10.5567	10.3942	10.3706	DYRK1B	9149	0.258317	0.692971	0.278081	0.378073	0.42157	0.0102766	0.528045	0.00217796	0.201786
ENSG00000164855	97.8062	0.897816	0.107882	8.32218	8.63613e-17	1.18468e-14	TMEM184A	202915	7.28655	7.49609	7.29382	6.6575	6.72527	6.97364	7.01058	7.25599	6.95022	8.34865	8.13482	8.12541	7.50506	7.6409	7.76845	6.89373	7.09928	6.82564	6.7496	7.25539	7.24644	6.80874	6.93218	6.98214	6.38126	6.7971	6.72712	6.99787	6.53988	6.34898	TMEM184A	202915	0.22273	0.9999	0.949314	0.2104	1.06811	1.13352e-05	1.48004	2.05695e-10	0.760336
ENSG00000011201	480.041	0.710644	0.0854132	8.32008	8.7907e-17	1.19801e-14	ANOS1	3730	8.58408	8.07404	8.44347	7.77624	7.85349	7.77002	7.17401	7.42008	6.86935	9.66734	9.33478	9.80087	9.11036	9.19503	9.22419	7.02547	6.65206	7.32339	8.88654	9.20935	9.0224	8.53399	8.17463	8.26619	9.78785	10.4084	10.3203	10.742	9.62818	9.77227	ANOS1	3730	0.227741	0.9999	0.647766	0.120689	0.969219	0.195182	0.61994	0.654151	0.81003
ENSG00000110697	4843.91	-0.340912	0.0409995	-8.31502	9.17358e-17	1.24207e-14	PITPNM1	9600	12.4042	12.5011	12.272	12.8849	12.8046	12.8843	11.8759	12.0535	12.0169	12.1479	11.9467	11.9478	12.4181	12.401	12.3627	12.2947	12.3558	12.3709	12.2767	12.1219	12.1659	12.7835	12.8923	12.958	11.4292	11.3152	11.0969	11.3039	11.5502	11.3631	PITPNM1	9600	-0.355491	0.0143727	-0.104668	0.705788	-0.486865	6.11723e-06	-0.175775	0.377776	-0.214751
ENSG00000270090	17.8829	1.85464	0.223268	8.30677	9.8346e-17	1.32298e-14	NA	NA	6.07611	6.34073	6.09883	5.74471	5.87604	5.67074	5.91959	5.75094	5.6581	6.65764	6.60686	6.68199	6.27922	6.48388	6.31508	5.7593	5.5817	5.53587	5.31798	6.01576	5.79579	5.29284	5.36618	5.43281	5.34684	5.74772	5.6621	5.91928	5.27793	5.20498	NA	NA	0.492342		3.1497	0.0182247	3.15351		2.07134		2.22824
ENSG00000165782	1974.87	-0.433613	0.0522842	-8.29338	1.10072e-16	1.47122e-14	PIP4P1	90809	10.6391	10.7222	10.6274	11.2639	11.2653	11.342	10.8303	11.0058	10.9682	10.906	10.8466	10.8113	10.6385	10.5535	10.5432	11.621	11.7081	11.5653	11.0687	10.9767	10.9846	10.7466	10.9472	10.9274	11.0493	10.728	10.4975	10.8111	11.1201	10.8911	PIP4P1	90809	-0.706415	2.06855e-07	-0.613532	0.000775745	-0.304811	0.0601154	-0.161442	0.608401	-0.351449
ENSG00000167632	2693.14	-0.346481	0.0417832	-8.29236	1.11025e-16	1.47451e-14	TRAPPC9	83696	11.1778	11.2732	11.1946	11.7	11.6744	11.661	11.3364	11.4043	11.4571	11.158	11.2194	11.1117	11.2687	11.2116	11.2435	11.5638	11.6241	11.6502	11.613	11.2114	11.3374	11.7909	11.8602	11.7313	11.4401	11.1954	11.0728	11.2573	11.412	11.3856	TRAPPC9	83696	-0.211397	0.451356	-0.227853	0.173115	-0.561312	4.76094e-09	-0.240593	0.100518	-0.243796
ENSG00000134265	2383.74	-0.235555	0.0285424	-8.2528	1.54728e-16	2.04192e-14	NAPG	8774	11.045	11.1926	11.216	11.5075	11.4829	11.4752	11.177	11.1316	11.1887	11.1256	11.0975	11.226	11.1041	11.1289	11.154	11.3512	11.3277	11.3535	11.264	11.5063	11.3904	11.4364	11.3964	11.3064	11.1777	11.0647	10.969	11.1176	11.1835	11.2684	NAPG	8774	-0.177679	0.995764	-0.17429	0.372339	-0.254272	0.351732	-0.24674	0.544806	-0.165418
ENSG00000185112	164.066	0.766313	0.0931658	8.22526	1.94764e-16	2.53814e-14	FAM43A	131583	7.77191	7.26521	7.21214	6.75744	6.86268	6.98845	7.96763	7.63431	7.52889	8.70538	8.95843	8.51185	7.81209	7.72579	7.78002	7.24173	7.34938	7.13512	8.01604	7.70471	7.79754	7.04478	7.27446	7.05477	7.88435	7.99074	8.3604	8.01575	7.83195	7.59355	FAM43A	131583	0.661198	0.857664	0.862352	0.0087124	0.901498	0.109925	1.07205	0.0757601	0.441444
ENSG00000136925	532.532	0.382108	0.0464546	8.22541	1.94522e-16	2.53814e-14	TSTD2	158427	9.43935	9.30099	9.33147	9.01178	9.18782	9.27486	9.42546	9.31536	9.34574	9.4512	9.42236	9.39252	9.34985	9.48553	9.34986	9.26027	9.01299	9.10794	8.95874	9.01878	8.99007	8.99938	8.72387	9.08697	8.77293	9.21142	9.37227	9.1663	8.88822	8.89616	TSTD2	158427	0.252887	0.367035	0.368933	0.38813	0.501784	4.0395e-06	0.475342	0.000143383	0.439328
ENSG00000129128	5277.77	-0.340413	0.0413912	-8.22428	1.96362e-16	2.54308e-14	SPCS3	60559	11.9822	12.0816	12.2391	12.4079	12.5317	12.3818	12.28	12.3035	12.3723	11.9762	12.0063	12.0958	11.5999	11.7253	11.8278	12.6455	12.5119	12.5831	12.6351	12.6723	12.5641	12.1309	12.0196	11.984	12.7872	12.6794	12.7023	12.6922	12.8149	12.9703	SPCS3	60559	-0.259881	0.0461446	-0.482144	8.73404e-06	-0.327052	0.000443811	-0.605825	4.14072e-13	-0.173221
ENSG00000156515	13041.7	-0.225678	0.0275939	-8.17855	2.87289e-16	3.69769e-14	HK1	3098	13.6513	13.6952	13.6954	13.9747	13.9667	13.9013	13.6308	13.7171	13.7487	13.6597	13.606	13.5631	13.386	13.3278	13.4095	13.8068	13.9971	13.9087	13.9508	13.7527	13.7515	13.5734	13.6628	13.6056	13.623	13.4271	13.2516	13.5129	13.6378	13.5419	HK1	3098	-0.201976	0.0346484	-0.167013	0.101722	-0.237559	0.000771748	-0.21363	0.00767331	-0.203931
ENSG00000170365	1159.9	0.458851	0.0561385	8.17355	2.99444e-16	3.8305e-14	SMAD1	4086	10.478	10.5093	10.4785	10.1824	10.1808	10.1971	10.2205	10.1303	10.1701	10.3289	10.4729	10.3472	10.8128	10.8733	10.6693	10.0251	9.87075	9.94407	10.0254	9.77874	9.89789	10.0481	9.75347	10.0651	10.0262	10.3925	10.2262	10.473	10.0927	9.92681	SMAD1	4086	0.242201	0.872159	0.830324	1.28245e-05	0.86541	7.02883e-08	0.503354	0.0159902	0.365677
ENSG00000100242	1929.14	0.241362	0.0295775	8.16034	3.3409e-16	4.24763e-14	SUN2	25777	11.2327	11.2494	11.175	11.0571	10.9721	11.013	11.1848	11.2455	11.1848	10.9755	11.0002	10.8579	11.0883	11.1343	11.1364	10.9714	11.1154	11.064	10.6518	10.5881	10.6784	10.8487	10.6107	10.9429	10.6346	10.8108	10.8323	10.7566	10.5834	10.5825	SUN2	25777	0.162825	0.9999	0.254814	0.349792	0.324901	0.315808	0.314369	0.504085	0.202661
ENSG00000131473	16491.3	-0.427269	0.0524489	-8.14639	3.74961e-16	4.72074e-14	ACLY	47	13.8076	13.8265	13.8164	14.5509	14.5151	14.4822	14.0319	14.0692	14.08	13.8518	13.8021	13.6995	13.3058	13.2003	13.4504	14.5238	14.4929	14.5647	14.2468	13.8536	13.8685	13.7699	13.7247	13.7961	13.9906	13.8842	13.5399	13.9847	14.253	14.1092	ACLY	47	-0.463452	0.00062723	-0.356979	0.00613094	-0.440021	0.000337597	-0.217761	0.26548	-0.308938
ENSG00000150768	2159.45	-0.301291	0.0369859	-8.14611	3.7583e-16	4.72074e-14	DLAT	1737	11.0196	10.9995	11.1295	11.3141	11.3253	11.3185	11.1637	11.1515	11.2266	10.9302	10.7998	11.0717	10.637	10.7735	10.6454	11.451	11.4472	11.4872	11.4453	11.4916	11.3834	10.9993	10.8156	10.8882	11.1031	10.9293	10.7037	10.9605	11.0518	11.0898	DLAT	1737	-0.282225	0.124246	-0.33193	0.0496184	-0.219834	0.10368	-0.515675	3.15343e-06	-0.220939
ENSG00000095539	1359.89	-0.232293	0.0285608	-8.1333	4.17765e-16	5.21605e-14	SEMA4G	57715	10.6449	10.6189	10.5857	10.8115	10.9099	10.8513	10.5112	10.5393	10.4201	10.234	10.2717	10.1933	10.5923	10.4698	10.4287	10.5954	10.6305	10.6669	10.573	10.4361	10.4936	10.8566	10.6777	10.6778	10.0511	9.83796	9.71204	9.78095	10.0227	9.92015	SEMA4G	57715	-0.140289	0.723222	-0.216966	0.36791	-0.245096	0.00414737	-0.282825	0.00410158	-0.238118
ENSG00000198053	627.767	0.308933	0.0379883	8.13232	4.21151e-16	5.22703e-14	SIRPA	140885	9.73142	9.71709	9.69038	9.37497	9.50647	9.39863	8.36314	8.4902	8.33694	9.50125	9.46078	9.41884	10.3416	10.3228	10.1496	8.24561	8.1736	8.47265	9.24309	9.22069	9.01324	10.0201	9.88074	9.9264	8.9744	9.25598	9.26766	9.41816	8.99138	9.06047	SIRPA	140885	0.125262	0.9999	0.829218	0.0026017	0.351694	0.0221101	0.324218	0.123163	0.3362
ENSG00000173706	407.192	0.774562	0.0953147	8.12636	4.42368e-16	5.45788e-14	HEG1	57493	9.081	8.42213	8.51137	7.86319	7.9568	7.63086	7.71111	7.45819	7.32327	10.078	9.96935	10.0094	9.16958	9.31144	9.50197	7.52854	7.16632	7.35496	9.44397	9.59644	9.45319	8.46425	8.07946	8.35716	8.34984	8.8707	9.33896	9.12314	8.36391	8.58795	HEG1	57493	0.209884	0.9999	0.96719	0.000123016	1.17007	0.131714	0.554054	0.748091	0.77571
ENSG00000182050	800.849	0.632015	0.0779309	8.10994	5.06456e-16	6.21183e-14	MGAT4C	25834	10.696	10.7976	10.8299	10.3117	10.3742	10.3935	9.81922	9.45355	9.46762	9.94925	10.1532	9.42463	10.2754	10.3276	10.0615	9.04488	8.92729	9.1435	9.26601	8.96578	8.80056	9.8032	9.52204	9.53719	7.88135	8.81986	8.85592	8.69185	8.47042	8.43122	MGAT4C	25834	0.604357	0.392953	0.379212	0.513499	0.639298	0.0556895	0.921387	0.00554891	0.58663
ENSG00000125967	1079.86	-0.354701	0.0438457	-8.08976	5.97807e-16	7.2894e-14	NECAB3	63941	9.67303	9.72817	9.6962	9.95036	9.76482	9.98732	10.081	10.1418	10.2268	9.98669	10.0608	10.1451	9.70598	9.82612	9.95767	10.2699	10.6134	10.3011	10.4634	10.3967	10.5951	10.1269	10.1952	10.2693	10.4784	10.1366	9.90489	10.1143	10.5282	10.4131	NECAB3	63941	-0.256964	0.264839	-0.454551	0.0616466	-0.383439	0.000629558	-0.443269	0.000154186	-0.440561
ENSG00000204851	1204.57	-0.352751	0.0436742	-8.07687	6.64486e-16	8.05535e-14	PNMA8B	57469	10.665	10.6628	10.5036	10.9621	10.8517	10.9434	10.3823	10.4301	10.4808	9.85926	9.81356	9.73959	9.93947	9.78511	9.71851	10.5662	10.7361	10.622	10.2676	10.0693	10.1228	10.2777	10.3845	10.3023	10.1796	9.81612	9.51744	9.84934	10.0006	9.9442	PNMA8B	57469	-0.214417	0.940954	-0.441689	0.0635752	-0.529308	0.0037838	-0.372582	0.141243	-0.330934
ENSG00000171612	1073.67	-0.365121	0.0452303	-8.07248	6.88823e-16	8.30211e-14	SLC25A33	84275	9.9509	10.0615	9.94359	10.3437	10.2206	10.3176	9.99692	10.0617	10.1561	10.0745	10.1595	10.1328	9.60321	9.59088	9.8004	10.3285	10.5073	10.3148	10.368	10.3716	10.4003	10.2658	10.3661	10.1901	10.2275	9.97736	9.71425	10.0259	10.1561	10.1154	SLC25A33	84275	-0.321871	0.0877154	-0.38038	0.163128	-0.640504	3.66107e-09	-0.271894	0.0982182	-0.270908
ENSG00000120053	3772.15	-0.286583	0.0355993	-8.05023	8.26412e-16	9.90317e-14	GOT1	2805	11.4476	11.5405	11.5494	11.9713	11.9094	11.8986	11.823	11.8507	11.8379	11.8851	11.8853	11.921	11.3979	11.4566	11.546	12.0732	12.238	12.2165	12.1478	12.0024	12.0139	11.7773	11.9065	11.7407	12.2398	11.9857	11.8561	12.1386	12.1181	12.1363	GOT1	2805	-0.339974	0.023375	-0.273122	0.0247215	-0.344902	0.00373695	-0.162718	0.445391	-0.172579
ENSG00000149084	1761.03	-0.384938	0.0478688	-8.04153	8.87258e-16	1.05715e-13	HSD17B12	51144	10.4285	10.4769	10.7829	11.1621	11.3085	11.1198	10.793	10.6234	10.7228	10.4329	10.3922	10.3457	10.2109	10.2514	10.2409	11.1115	11.0752	11.1129	10.6875	10.6921	10.5516	10.7909	10.5877	10.4037	11.2118	11.0979	11.0031	11.1424	11.3236	11.4167	HSD17B12	51144	-0.392535	0.555783	-0.339226	0.0872255	-0.38047	0.15429	-0.266224	0.557978	-0.245774
ENSG00000105251	459.465	-0.509958	0.0635838	-8.02024	1.05538e-15	1.25033e-13	SHD	56961	9.60027	9.6312	9.467	10.1824	10.1703	10.1758	7.9174	8.40995	8.58565	7.47963	7.80208	7.87516	8.65531	8.80048	8.94425	8.77805	8.55212	8.72302	8.15465	7.8403	8.08073	9.16186	9.05014	9.34076	9.20001	8.68214	8.80897	8.46615	9.11615	9.26495	SHD	56961	-0.409711	0.9999	-0.473259	0.46467	-0.426661	0.569664	-0.387879	0.783283	-0.608936
ENSG00000120645	2051.18	-0.371887	0.046374	-8.0193	1.06348e-15	1.2528e-13	IQSEC3	440073	10.8138	10.8094	10.8404	11.0261	11.167	11.1545	11.0111	11.0027	10.9311	10.6385	10.4712	10.4918	10.8488	10.7467	10.7284	11.1	11.1594	11.1472	10.9228	10.8728	10.9858	11.2913	11.2488	11.3421	11.4592	11.246	10.7364	11.1913	11.6006	11.471	IQSEC3	440073	-0.153139	0.9999	-0.413349	0.0153971	-0.530046	0.010959	-0.406785	0.142619	-0.447312
ENSG00000063015	1364.55	-0.383279	0.0478681	-8.00698	1.17564e-15	1.37715e-13	SEZ6	124925	10.0934	10.1025	10.1694	10.4581	10.5691	10.6078	9.72502	9.6799	9.68975	10.7922	10.8689	10.808	10.973	11.037	10.9628	9.99873	10.0854	10.1237	11.2392	11.1105	11.1448	11.4318	11.4363	11.2757	8.89938	8.76716	8.23882	8.79366	9.06278	8.76101	SEZ6	124925	-0.390217	0.98067	-0.152514	0.528211	-0.398503	0.498043	-0.353732	0.730146	-0.332007
ENSG00000158985	938.663	-0.302596	0.0378245	-8	1.24419e-15	1.4493e-13	CDC42SE2	56990	9.99695	10.0571	9.97502	10.2456	10.266	10.2062	9.93283	9.70584	9.7656	9.75025	9.75296	9.79642	9.91227	9.91879	9.95767	9.99873	9.87797	9.87975	10.052	10.1545	10.0397	10.4126	10.3901	10.3108	9.64678	9.5159	9.34611	9.57203	9.84866	9.81674	CDC42SE2	56990	-0.121104	0.9999	-0.317324	0.126261	-0.4616	0.00609634	-0.337118	0.149238	-0.315869
ENSG00000166436	728.041	0.527225	0.0659106	7.9991	1.25328e-15	1.45178e-13	TRIM66	9866	9.23137	9.15663	9.11381	8.72695	9.02895	8.84235	8.60292	8.56047	8.59761	9.69928	9.99097	9.81854	11.0097	11.0112	10.7092	8.50999	8.39242	8.54115	9.41352	9.21314	9.24218	10.3879	9.8667	10.2175	9.10917	9.74896	9.7508	9.77096	9.10195	9.13394	TRIM66	9866	0.126502	0.9999	0.733011	0.0101879	0.776292	0.0162176	0.59029	0.184675	0.694081
ENSG00000101280	57.9124	-0.769514	0.0962428	-7.99555	1.28993e-15	1.46979e-13	ANGPT4	51378	6.26639	6.34073	6.51613	6.78122	6.66143	6.83209	6.29253	6.45889	6.45191	7.08193	7.16853	6.92794	6.57839	6.48388	6.54198	6.64557	6.83329	6.53857	7.76774	7.86003	7.5877	6.88608	7.0415	6.90521	6.0835	5.75668	5.67539	5.82115	5.89258	6.11677	ANGPT4	51378	-0.508241	0.995764	-0.39815	0.6478	-0.709161	0.320246	-0.963315	0.206993	-0.799827
ENSG00000196230	44810.9	0.340963	0.0426441	7.99555	1.28997e-15	1.46979e-13	TUBB	203068	15.902	15.8744	15.8651	15.5834	15.5363	15.413	15.7852	15.8512	15.8558	15.2825	15.4223	15.2081	15.7669	15.6741	15.7188	15.5126	15.637	15.7324	15.049	14.6928	14.7554	15.2164	15.5836	15.2582	14.8654	15.1616	15.0934	15.2494	14.9518	14.756	TUBB	203068	0.205998	0.98067	0.435399	7.22311e-08	0.361616	0.149591	0.465569	0.082827	0.306663
ENSG00000153904	4178.54	-0.287395	0.0359408	-7.99634	1.28177e-15	1.46979e-13	DDAH1	23576	12.475	12.4755	12.5952	12.8282	12.819	12.7693	11.8912	11.832	11.9558	11.8751	11.8197	11.7573	11.6083	11.5254	11.5609	12.1333	11.9352	12.0664	12.288	12.2088	12.1209	12.0998	11.9523	11.867	11.5036	11.4234	11.3567	11.5182	11.6495	11.677	DDAH1	23576	-0.151338	0.654402	0.0142298	0.97663	-0.413882	3.15986e-07	-0.396233	4.43219e-06	-0.183877
ENSG00000162511	133.975	0.822697	0.103119	7.97817	1.48521e-15	1.68305e-13	LAPTM5	7805	8.26613	8.25489	8.21783	7.80948	7.88004	7.96297	7.08311	6.96462	7.19938	8.39984	8.29143	8.15378	7.33978	6.99797	7.1667	6.82243	6.65206	7.09785	7.16369	7.43991	7.29408	6.66083	6.33837	6.42864	7.43954	7.63673	7.80764	7.87445	6.94476	7.05268	LAPTM5	7805	0.34922	0.9999	0.0848625	0.930709	1.1733	0.0222433	1.27734	0.0132653	0.847331
ENSG00000124541	1119.43	-0.227377	0.0285541	-7.96302	1.67894e-15	1.8923e-13	RRP36	88745	10.1144	10.0832	10.1312	10.3079	10.3401	10.3465	10.324	10.2948	10.3087	9.96622	9.94	10.0604	9.86371	9.86993	9.88711	10.4306	10.4839	10.5278	10.1739	10.0462	10.0352	10.1306	10.3123	10.2295	10.3444	10.101	10.0984	10.1904	10.3434	10.3629	RRP36	88745	-0.17399	0.269439	0.0415485	0.945867	-0.370404	8.05572e-08	-0.102124	0.548141	-0.23352
ENSG00000168016	788.595	0.543981	0.0685008	7.94124	2.00169e-15	2.24393e-13	TRANK1	9881	9.56705	9.82419	9.68747	9.30778	9.20866	9.43249	9.53651	9.35528	9.26208	10.362	10.5099	10.771	9.96846	10.1549	10.2295	9.13425	9.24308	9.09891	9.77186	10.1953	10.3211	9.45526	9.20834	9.23147	9.00743	9.74612	9.75885	9.60254	9.01241	9.19514	TRANK1	9881	0.254764	0.998244	0.052009	0.94433	0.881316	0.00227518	0.461513	0.314239	0.682487
ENSG00000130518	147.873	0.747958	0.0942348	7.93718	2.06838e-15	2.3063e-13	IQCN	80726	7.38984	7.39986	7.47183	7.05584	7.05264	7.07396	7.41471	7.51944	7.13285	8.09572	7.81308	7.80495	8.14793	8.04981	8.0322	7.35649	7.26096	7.15338	6.9233	7.09395	7.63715	7.10958	7.23619	7.34558	7.74746	8.44291	8.62189	8.30034	7.66879	7.8403	IQCN	80726	0.150139	0.9999	0.389132	0.640891	1.12781	1.56762e-07	0.896359	0.00063959	0.866516
ENSG00000169710	23010.4	-0.496601	0.0625791	-7.93556	2.0954e-15	2.324e-13	FASN	2194	14.5208	14.5396	14.4202	15.3444	15.3139	15.2643	14.4593	14.5909	14.593	13.8166	13.7946	13.5603	14.1	13.9646	13.9616	15.1684	15.2093	15.2264	14.1439	13.6719	13.6793	14.4646	14.3824	14.4294	14.2689	14.0364	13.8276	14.0595	14.6455	14.4134	FASN	2194	-0.648943	0.0418953	-0.507943	0.000164629	-0.413655	0.146775	-0.122619	0.894295	-0.476592
ENSG00000119950	536	0.465507	0.0588271	7.91314	2.5097e-15	2.76877e-13	MXI1	4601	9.6559	9.59837	9.66094	9.21302	9.26609	9.17063	9.18953	9.14736	9.1532	9.14458	9.40455	9.53032	9.63395	9.60667	9.38756	9.03377	9.02606	8.96612	8.89147	9.08239	8.99938	8.88429	8.81896	8.81084	8.91325	9.20907	9.46388	9.03451	8.74385	8.79678	MXI1	4601	0.174092	0.923629	0.0784402	0.893639	0.786468	1.27988e-11	0.410317	0.00879838	0.46944
ENSG00000149212	2109.59	0.657262	0.0833255	7.88789	3.0734e-15	3.37281e-13	SESN3	143686	11.1617	10.9765	11.0748	10.4701	10.492	10.5113	10.3429	10.2724	10.3231	11.0622	10.9532	11.1773	11.4131	11.3436	11.0818	9.98152	9.604	9.82613	10.4485	10.3901	10.2154	10.3863	10.0852	10.0718	11.7746	12.0012	12.6814	11.8955	11.8585	12.179	SESN3	143686	0.532946	0.733907	0.48166	0.0208867	1.13938	0.000682151	0.735881	0.10589	0.28473
ENSG00000099860	170.055	0.787333	0.0998509	7.88509	3.14296e-15	3.4311e-13	GADD45B	4616	7.92479	8.17554	7.66605	7.03666	6.96972	7.15426	6.29253	6.72639	6.78301	9.21579	9.00652	8.92995	7.82245	7.52351	7.64723	6.46357	6.62743	6.31205	8.66256	8.72103	8.94258	6.95902	7.02643	6.80638	7.22269	7.66148	7.85112	7.81651	7.02601	7.06604	GADD45B	4616	0.295481	0.9999	0.655291	0.319901	1.07223	0.00521291	0.308793	0.734337	0.933439
ENSG00000258390	8.05841	2.46226	0.312301	7.88426	3.16406e-15	3.43614e-13	LINC02318	100506999	5.78516	6.12295	5.85941	5.32704	5.72789	5.67074	5.6998	5.5636	5.58805	6.03142	5.74613	6.06312	5.5887	5.71753	5.93004	5.14789	5.31045	4.83516	5.17736	5.17105	4.83516	5.15947	5.14289	5.13558	5.23233	5.72949	5.7743	5.60077	5.01651	5.22729	LINC02318	100506999	2.48827		1.92025		3.18487		4.10242		2.75569
ENSG00000122378	5699.16	-0.278409	0.035315	-7.88361	3.18068e-15	3.43629e-13	PRXL2A	84293	12.5633	12.5875	12.6456	12.9834	13.0144	12.9536	12.453	12.3948	12.4556	11.9447	12.0798	11.979	11.8139	11.8528	11.9276	12.7625	12.8006	12.7889	12.2507	12.1224	12.0864	12.114	12.2031	12.0315	12.8565	12.708	12.3786	12.7772	12.8831	12.8667	PRXL2A	84293	-0.347908	0.00062723	-0.237721	0.0658402	-0.252732	0.0110104	-0.156629	0.305574	-0.240916
ENSG00000104419	1130.3	0.892968	0.113593	7.86113	3.80691e-15	4.09164e-13	NDRG1	10397	10.3222	10.6189	10.397	10.0586	10.1126	10.1557	9.40759	9.47786	9.50289	10.9176	10.6479	11.0708	11.1873	11.0486	10.9185	9.35546	9.4381	9.40747	9.4836	9.68639	9.6431	9.95842	10.0938	10.0364	9.1596	10.4936	10.5211	10.807	9.13835	9.09019	NDRG1	10397	0.0732846	0.9999	0.803028	8.23921e-07	1.06894	0.00045482	1.34451	9.45455e-06	1.57955
ENSG00000166411	1365.9	-0.362893	0.0461878	-7.85691	3.93736e-15	4.21015e-13	IDH3A	3419	9.93679	10.0103	10.0244	10.201	10.3035	10.4781	10.3216	10.3016	10.2477	10.6385	10.2912	10.6369	9.89667	9.85944	9.99597	10.5007	10.476	10.5789	10.9276	11.0952	11.1153	10.4096	10.1396	10.2722	10.844	10.6535	10.3494	10.6881	10.8671	10.8909	IDH3A	3419	-0.233599	0.9999	-0.161603	0.616994	-0.37522	0.437992	-0.535776	0.32279	-0.307598
ENSG00000139428	884.085	-0.342943	0.0437178	-7.84447	4.3477e-15	4.6252e-13	MMAB	326625	9.77966	9.72817	9.72209	10.2475	10.2857	10.2491	9.99692	10.0597	10.0366	9.33976	9.19253	9.07694	9.57633	9.55553	9.34412	10.3405	10.4211	10.3979	9.50942	9.32598	9.18216	9.76042	9.8667	9.72066	10.1513	9.8814	9.7137	9.99833	10.2217	10.1373	MMAB	326625	-0.366711	0.00524566	-0.0631489	0.932683	-0.305888	0.0095403	-0.152062	0.551189	-0.320482
ENSG00000273472	524.585	0.605483	0.0776104	7.80157	6.11428e-15	6.47152e-13	NA	NA	9.5701	9.54924	9.22676	8.88416	9.27928	9.19209	9.17375	9.13212	9.21255	9.39656	9.41881	9.08428	9.61793	9.62384	9.55261	8.98461	8.71741	9.10794	8.90127	8.65549	8.73509	8.71485	8.34768	8.88502	8.85317	9.4827	9.56907	9.59689	8.96546	8.78908	NA	NA	0.258332	0.98067	0.816022	0.105106	1.0373	4.65398e-06	0.600713	0.0504191	0.744497
ENSG00000106615	4091.63	-0.243131	0.0312016	-7.79224	6.58323e-15	6.93267e-13	RHEB	6009	12.0228	12.0908	12.1328	12.4141	12.3264	12.2968	11.9942	12.0641	12.1277	11.8984	11.898	11.9413	11.5378	11.5427	11.6151	12.3792	12.4751	12.3535	12.1554	12.1214	12.0377	11.7945	11.9637	11.8271	11.9672	11.7711	11.6464	11.854	11.827	11.8236	RHEB	6009	-0.339237	0.0028151	-0.261454	0.300915	-0.300108	0.00319538	-0.197222	0.16807	-0.119288
ENSG00000001630	767.159	-0.48919	0.0628503	-7.78341	7.05979e-15	7.39717e-13	CYP51A1	1595	9.60027	9.75007	9.67868	10.0967	10.241	10.453	9.64342	9.88455	9.92293	9.22837	9.05304	9.08061	9.16156	9.07746	9.04218	10.4122	10.3117	10.5312	9.5473	9.24682	9.39096	9.40365	9.11281	9.55161	9.57895	9.3347	8.94261	9.37309	9.88809	9.76093	CYP51A1	1595	-0.623467	0.00631263	-0.456367	0.187273	-0.296619	0.242789	-0.304761	0.368036	-0.562126
ENSG00000120694	5699.23	-0.263398	0.0338509	-7.78113	7.18787e-15	7.49372e-13	HSPH1	10808	12.3613	12.3766	12.5	12.7461	12.7607	12.7567	12.3812	12.3674	12.3908	12.4686	12.3955	12.5159	12.2445	12.2841	12.2198	12.4775	12.4177	12.5267	12.7618	12.7385	12.7147	12.746	12.6349	12.6067	12.3922	12.2847	12.0779	12.3571	12.4228	12.4516	HSPH1	10808	-0.0909683	0.984879	-0.274409	0.0323711	-0.41496	1.23051e-06	-0.281494	0.00668108	-0.18183
ENSG00000257354	110.988	0.545953	0.0701759	7.77978	7.26533e-15	7.50156e-13	NA	NA	7.38984	7.63488	7.56588	7.09338	7.1899	7.20522	7.46876	7.62324	7.54156	7.24513	7.26986	7.49348	7.70406	7.80579	7.96321	7.25498	7.3059	7.43083	6.49165	7.05917	6.87585	7.48016	7.39471	7.4756	6.8972	7.172	7.40834	7.25852	6.93071	6.81781	NA	NA	0.305172	0.9999	1.71613	0.260284	0.507845	0.450048	0.782523	0.325009	0.607288
ENSG00000100344	482.976	-0.54334	0.0698404	-7.77974	7.26735e-15	7.50156e-13	PNPLA3	80339	8.90333	9.12341	9.19421	9.73448	9.78574	9.76229	9.52827	9.28812	9.43478	8.53814	8.4879	8.26191	8.52648	8.37745	8.21676	10.0583	10.0623	10.0624	8.69678	8.496	8.30893	8.92369	8.69681	8.73683	8.62979	8.3844	8.00539	8.24116	8.97328	8.68999	PNPLA3	80339	-0.683942	7.86916e-06	-0.510635	0.188728	-0.469935	0.00509504	-0.0909222	0.894656	-0.650009
ENSG00000183597	471.738	-0.304016	0.0390853	-7.77827	7.35228e-15	7.55184e-13	TANGO2	128989	8.64927	8.60231	8.75464	8.99762	8.88955	8.94716	9.14165	8.94838	8.86315	9.19352	9.11135	9.24992	8.9749	8.89373	8.92383	9.15148	9.47348	9.38909	9.52216	9.44357	9.412	9.21922	9.19231	9.28139	8.83026	8.64946	8.50614	8.66038	8.82832	8.76023	TANGO2	128989	-0.389153	0.681355	-0.454652	0.149162	-0.330468	0.279546	-0.300506	0.511732	-0.230846
ENSG00000155368	865.951	-0.529258	0.0681343	-7.76787	7.98149e-15	8.15794e-13	DBI	1622	9.97641	9.95011	10.0766	10.7994	10.5996	10.6124	9.76765	9.75637	9.95336	9.37976	9.37924	9.27255	9.04423	8.91675	8.94171	10.3717	10.4309	10.336	9.87224	9.58772	9.443	9.47304	10.0852	9.63749	9.67613	9.39904	9.49703	9.48301	9.61783	9.63168	DBI	1622	-0.575774	0.0926878	-0.0689651	0.940627	-0.856971	7.6765e-05	-0.327284	0.422853	-0.200384
ENSG00000141568	2553.18	-0.194315	0.025148	-7.72685	1.10237e-14	1.12124e-12	FOXK2	3607	11.4534	11.4639	11.3775	11.6093	11.6256	11.6159	11.3516	11.3445	11.3626	11.2268	11.2174	11.0846	11.2542	11.1709	11.315	11.4887	11.5019	11.5694	11.3943	11.3003	11.342	11.4529	11.3984	11.5513	11.146	11.0444	10.9268	11.0739	11.3038	11.2045	FOXK2	3607	-0.165525	0.238501	-0.201771	0.42501	-0.222911	0.00184859	-0.174252	0.0662781	-0.211199
ENSG00000172965	783.611	0.458211	0.0594865	7.70278	1.33139e-14	1.34761e-12	MIR4435-2HG	541471	9.99922	10.0768	10.2565	9.75703	9.81317	9.85349	9.22059	9.30521	9.46762	10.4179	10.5099	10.4542	10.1596	10.1783	10.0903	9.32847	9.30869	9.17391	10.2039	10.0009	9.8266	9.40982	9.31577	9.37362	8.56363	8.98525	8.96325	9.10277	8.53989	8.48189	MIR4435-2HG	541471	0.0741131	0.9999	0.469881	0.0321124	0.833427	0.000287746	0.462269	0.166007	0.555377
ENSG00000164684	2041.52	0.539447	0.0700557	7.70026	1.35789e-14	1.3678e-12	ZNF704	619279	11.6376	11.4448	11.5325	11.3103	11.4534	11.3704	10.7298	10.3648	10.595	11.3547	10.9569	11.2457	11.5976	11.5184	11.245	10.2995	9.96635	10.2972	10.6804	10.7571	10.5245	10.8999	10.6789	10.7524	10.3671	11.2912	11.4903	11.3104	10.4498	10.7139	ZNF704	619279	0.395391	0.703874	0.264687	0.476022	0.702502	0.00502484	0.552806	0.0825147	0.870072
ENSG00000145016	3574.57	-0.239917	0.0311729	-7.69633	1.40029e-14	1.40372e-12	RUBCN	9711	11.7392	11.8128	11.7436	12.0292	12.0321	11.9888	11.884	11.7974	11.8485	11.5659	11.5212	11.5271	11.9256	11.7889	11.6836	12.0367	12.024	12.0658	11.8784	11.7743	11.6933	12.0632	12.0487	12.0173	11.6183	11.6174	11.389	11.6005	11.9005	11.8177	RUBCN	9711	-0.197231	0.201305	-0.0793511	0.793381	-0.240449	0.00537934	-0.251505	0.0105393	-0.2507
ENSG00000102981	583.97	-0.429888	0.0559933	-7.67749	1.62239e-14	1.61859e-12	PARD6A	50855	9.21585	9.01888	9.10508	9.36766	9.34972	9.46557	9.11984	9.2984	9.32796	9.2532	9.31203	9.1204	9.13926	9.09997	9.15806	9.4051	9.60109	9.59236	9.69522	9.54927	9.56073	9.49642	9.85658	9.82324	9.25429	8.88847	8.48026	8.94704	9.20406	9.11007	PARD6A	50855	-0.299228	0.53138	-0.274724	0.586391	-0.652206	1.02697e-05	-0.40782	0.0409744	-0.45282
ENSG00000104687	1502.91	-0.190151	0.0247699	-7.6767	1.63238e-14	1.6208e-12	GSR	2936	10.478	10.5889	10.5476	10.7069	10.7335	10.6293	10.5236	10.3616	10.4101	10.3944	10.4154	10.4821	10.5119	10.4384	10.5515	10.5074	10.5754	10.4887	10.6676	10.7097	10.7421	10.6768	10.6155	10.6897	10.9051	10.6429	10.6499	10.6629	10.8205	10.8776	GSR	2936	-0.0920209	0.9999	-0.0638183	0.875213	-0.162376	0.305816	-0.287709	0.0610195	-0.227189
ENSG00000126882	125.911	-0.659889	0.0859753	-7.67533	1.64989e-14	1.63042e-12	FAM78A	286336	7.07073	7.32671	6.86777	7.62222	7.58863	7.54598	7.10643	7.24137	7.35255	7.40207	7.50797	7.50471	6.72737	6.91484	6.9729	7.69105	7.49791	7.41599	8.47791	7.97296	8.15816	7.35444	7.40617	7.56561	7.52369	7.3721	7.11821	7.33654	7.75276	7.47519	FAM78A	286336	-0.420429	0.733907	-0.707514	0.263105	-0.857942	0.000825442	-0.9637	0.00010694	-0.431526
ENSG00000101638	900.809	-0.647818	0.0845138	-7.66523	1.78507e-14	1.75569e-12	ST8SIA5	29906	8.913	8.92071	8.76578	9.33429	9.32132	9.2863	8.91974	8.69141	8.85322	9.90887	9.75858	10.3965	7.54344	7.69606	7.49329	9.55231	9.45429	9.50971	11.0545	11.1316	11.2994	7.97062	8.14808	8.03724	10.6678	10.7392	10.7531	10.4233	10.837	11.0604	ST8SIA5	29906	-0.749347	0.575843	-0.420508	0.150726	-0.609059	0.287711	-1.162	0.0164132	-0.228888
ENSG00000006116	217.238	0.631931	0.0824544	7.66401	1.80219e-14	1.7642e-12	CACNG3	10368	8.76066	8.80486	8.61371	7.88411	8.01373	7.94848	7.65053	7.51944	7.26275	8.7366	8.75939	8.93402	8.29181	8.11814	8.01283	6.89373	7.11636	7.05949	8.20332	8.31637	8.27849	7.38053	7.75681	7.71242	8.07601	7.97403	7.9665	8.23071	7.48941	7.75642	CACNG3	10368	0.677781	0.9999	-0.0382206	0.94951	0.665453	0.606906	0.63571	0.779713	0.336667
ENSG00000166444	564.104	0.426637	0.055699	7.65969	1.86381e-14	1.80755e-12	DENND2B	6764	9.20803	9.11498	8.98646	8.58236	8.74467	8.67792	8.51347	8.70696	8.65595	9.85926	9.78908	9.79642	9.211	9.41194	9.40972	8.39851	8.39917	8.49355	9.47379	9.65888	9.55759	8.76879	8.60754	8.93732	9.62526	9.86955	10.1981	9.8316	9.37556	9.59295	DENND2B	6764	0.238259	0.98067	0.366643	0.323546	0.637169	0.00480003	0.266204	0.551189	0.464444
ENSG00000162738	2136.52	0.257763	0.0336518	7.65971	1.86346e-14	1.80755e-12	VANGL2	57216	11.8092	11.707	11.6754	11.4832	11.5103	11.4525	11.2526	11.2622	11.2755	10.8853	10.9496	10.8472	11.5034	11.4382	11.3092	11.115	11.0089	11.0617	10.7618	10.6551	10.5453	11.1458	10.952	11.1361	10.2076	10.428	10.6499	10.3467	10.2908	10.2659	VANGL2	57216	0.210768	0.98067	0.254954	0.368429	0.349871	0.185794	0.244129	0.597887	0.229728
ENSG00000141858	1618.02	-0.335461	0.0439111	-7.63954	2.18007e-14	2.10447e-12	SAMD1	90378	10.6932	10.718	10.5282	10.9802	10.8789	10.8685	10.5705	10.7383	10.8463	10.4544	10.3885	10.2914	10.9039	10.7714	10.884	10.8033	10.9857	10.9039	10.7658	10.5954	10.6654	11.2291	11.3837	11.4318	10.2779	9.98802	9.728	9.95267	10.3725	10.1394	SAMD1	90378	-0.176275	0.982698	-0.400038	0.154103	-0.50648	0.00622506	-0.310747	0.277482	-0.394891
ENSG00000155792	141.104	0.607583	0.0796423	7.62889	2.36775e-14	2.27512e-12	DEPTOR	64798	7.19125	6.92668	7.14301	6.429	6.86268	6.61479	6.90715	7.0522	6.48087	8.032	7.92871	8.02905	7.96925	7.94823	8.05604	6.38737	6.43926	6.47823	7.58197	7.14447	7.66123	7.62806	7.41754	7.46523	8.00218	8.51258	8.29497	8.55992	8.22918	7.98891	DEPTOR	64798	0.730906	0.950595	0.323644	0.731313	0.638741	0.437992	0.676592	0.577555	0.459448
ENSG00000179603	205.455	-0.507613	0.0666351	-7.61781	2.58022e-14	2.4679e-12	GRM8	2918	8.20414	8.23155	8.31243	8.5438	8.67636	8.82673	7.75488	7.56654	7.67375	8.29555	8.44652	8.36843	7.59908	7.62834	7.53514	7.99164	8.10905	8.00281	9.04083	8.97921	9.05402	7.53894	7.88363	7.74682	6.16173	6.05589	5.78585	6.10565	6.24186	6.28538	GRM8	2918	-0.471852	0.674198	-0.138253	0.919877	-0.187899	0.695712	-0.753733	0.0129094	-0.562542
ENSG00000198561	4286.14	0.238469	0.0313451	7.60785	2.78693e-14	2.65344e-12	CTNND1	1500	12.2402	12.1428	12.1472	11.845	11.9009	11.8709	12.1248	12.1258	12.1435	11.9121	11.9529	11.9878	12.1536	12.1946	12.1517	11.9641	11.8578	11.9801	11.837	11.8166	11.7535	11.8823	11.6759	11.7769	12.3006	12.4196	12.6202	12.4375	12.3366	12.4129	CTNND1	1500	0.20391	0.272929	0.188566	0.452331	0.395085	3.8664e-06	0.149073	0.32597	0.141277
ENSG00000275038	447.076	0.370523	0.048713	7.60623	2.82211e-14	2.67472e-12	NA	NA	9.14796	9.24034	9.21058	8.68627	8.81895	8.92899	9.32905	9.26035	9.38752	9.01259	9.12012	8.74311	9.57028	9.48894	9.24899	9.1549	9.20145	8.99076	8.67977	8.58092	8.63091	9.19798	8.91985	9.18901	8.11344	8.44793	8.53911	8.51338	8.05323	8.23241	NA	NA	0.231343	0.767937	0.481197	0.347017	0.371266	0.0171817	0.377497	0.0626757	0.433987
ENSG00000163050	467.224	0.385336	0.0506895	7.60189	2.91832e-14	2.75339e-12	COQ8A	56997	8.96967	8.98227	8.88803	8.39998	8.12849	8.56933	8.78751	8.85385	8.84823	9.47513	9.41526	9.5752	8.99311	8.96909	9.08875	8.68155	8.63431	8.61289	8.92068	9.18638	9.15327	8.63787	8.7194	8.6089	9.34688	9.36776	9.63593	9.56048	9.24661	9.24543	COQ8A	56997	0.218874	0.982289	0.640061	0.0767869	0.413272	0.105665	0.435401	0.148486	0.261555
ENSG00000175497	1189.9	-0.544877	0.0718721	-7.58121	3.42348e-14	3.21545e-12	DPP10	57628	10.5446	10.3697	10.4005	10.8786	11.0021	10.8609	9.51163	9.2743	9.51864	10.6396	10.5558	10.7744	8.79702	8.81418	8.62162	10.1956	10.1404	10.2224	11.4709	11.5548	11.5655	9.45526	9.03584	9.1293	9.64766	9.64672	9.60944	9.82196	9.75175	9.78892	DPP10	57628	-0.794645	5.50284e-08	-0.107447	0.846152	-0.521952	0.000825442	-0.89602	3.21505e-12	-0.0396894
ENSG00000040608	650.421	-0.395102	0.0521302	-7.57915	3.47818e-14	3.25217e-12	RTN4R	65078	9.49822	9.52404	9.33893	9.85171	9.87304	9.68665	9.39857	9.53977	9.51864	9.46454	9.56062	9.17293	9.37261	9.44745	9.40972	9.60821	9.92516	9.86121	9.64079	9.63367	9.68691	9.79851	9.82993	9.87765	8.79045	8.45792	8.07834	8.49345	8.90605	8.69824	RTN4R	65078	-0.331496	0.245861	-0.752693	0.00050399	-0.454816	0.0015016	-0.269065	0.227744	-0.517865
ENSG00000100596	3342.35	-0.278348	0.036773	-7.56936	3.75072e-14	3.49135e-12	SPTLC2	9517	11.6556	11.6049	11.745	11.9701	11.9776	11.9358	11.7157	11.5911	11.754	11.3991	11.2536	11.297	11.2711	11.2291	11.2633	11.9554	11.7295	11.9813	11.8164	11.6261	11.564	11.5743	11.3524	11.4765	12.0275	11.9431	11.8166	11.9439	12.2953	12.2717	SPTLC2	9517	-0.20349	0.475396	-0.183915	0.551698	-0.217035	0.0785534	-0.363051	0.00161115	-0.307252
ENSG00000261008	258.233	0.388948	0.0515447	7.54583	4.49406e-14	4.1647e-12	LINC01572	101927957	8.59013	8.59625	8.58251	8.39998	8.20012	8.47207	8.77359	8.59435	8.57963	8.52797	8.72527	8.60685	8.73336	8.8169	8.61206	8.41006	8.15774	8.26119	8.27331	8.28772	8.0449	8.30697	8.20068	8.35716	6.92486	7.24285	7.0936	7.15071	7.05458	6.97522	LINC01572	101927957	0.438829	0.793072	-0.0951579	0.895535	0.510829	0.152075	0.489459	0.30783	0.272024
ENSG00000165379	1856.95	-0.349891	0.0463887	-7.54259	4.60711e-14	4.25057e-12	LRFN5	145581	10.4251	10.5457	10.5794	10.6909	10.8081	10.7373	10.7494	10.7483	10.7969	10.841	10.6984	10.9618	10.1208	10.13	10.2337	10.9607	10.8855	11.0419	11.5437	11.436	11.456	10.6781	10.3859	10.5316	11.3738	11.1617	10.9849	11.2169	11.3383	11.4251	LRFN5	145581	-0.200188	0.950595	-0.394175	0.027221	-0.38741	0.03993	-0.658954	0.00010694	-0.263227
ENSG00000035664	55.0094	0.79774	0.106041	7.52293	5.35606e-14	4.89821e-12	DAPK2	23604	6.93805	7.15031	7.05121	6.70848	6.74584	6.63443	6.41955	6.34438	6.56374	6.36181	6.63377	6.19857	7.556	7.48205	7.09256	5.89651	6.10163	6.07257	6.40201	6.13713	6.17073	6.49262	6.70061	6.8234	6.47679	7.0263	6.85272	7.0384	6.57417	6.45777	DAPK2	23604	0.953721	0.292906	1.23832		1.11326	0.000270731	0.335313		0.818656
ENSG00000178149	769.335	-0.320259	0.042571	-7.52294	5.35583e-14	4.89821e-12	DALRD3	55152	9.1843	9.31208	9.22273	9.69416	9.65539	9.71443	9.46055	9.5908	9.60379	9.90104	9.86651	9.58298	9.79545	9.65149	9.83625	9.87788	9.76316	9.87975	10.0029	9.86792	9.89292	10.0362	10.2096	10.1669	9.52257	9.17752	9.12101	9.32558	9.49887	9.39111	DALRD3	55152	-0.30123	0.267239	-0.430368	0.22844	-0.395956	0.00232733	-0.142642	0.63873	-0.288113
ENSG00000131828	2595.96	-0.250918	0.0333657	-7.52023	5.46807e-14	4.97881e-12	PDHA1	5160	11.07	11.0955	11.004	11.4149	11.3504	11.4563	11.2249	11.2779	11.3791	11.4642	11.4397	11.4987	10.9695	11.0136	11.16	11.5002	11.6684	11.4794	11.7065	11.5578	11.6416	11.2584	11.4089	11.3552	11.4881	11.3561	11.1635	11.4243	11.487	11.4962	PDHA1	5160	-0.255831	0.0312377	-0.193112	0.352084	-0.296761	0.000648806	-0.173264	0.172526	-0.177583
ENSG00000106686	70.5458	0.75628	0.100599	7.51775	5.5727e-14	5.05202e-12	SPATA6L	55064	6.93805	6.90619	7.27787	6.6312	6.70435	6.69152	6.56974	6.63579	6.84831	7.19292	6.89672	7.10467	7.69843	7.46794	7.38271	6.51174	6.81202	6.62374	6.49165	6.57223	6.918	6.88608	6.91579	6.60218	6.56916	7.11301	7.1526	7.13921	6.57792	6.50856	SPATA6L	55064	0.0816511	0.9999	1.19614	0.130261	1.0836	0.000174174	0.661466	0.161596	0.969841
ENSG00000175197	545.751	0.551966	0.0734976	7.50998	5.91362e-14	5.33788e-12	DDIT3	1649	8.85399	8.95418	8.9817	8.49746	8.40767	8.65597	8.35378	8.50216	8.30073	9.84302	9.93257	9.73029	10.3193	10.288	10.2108	8.42152	8.48405	8.40805	9.296	9.28335	9.45657	9.30449	9.5169	9.56115	8.68452	9.21435	9.14008	9.32948	8.40805	8.39504	DDIT3	1649	-0.0529398	0.9999	1.03951	0.00234304	0.862388	1.29547e-05	0.526089	0.0480419	0.820839
ENSG00000157330	14.7485	1.86223	0.248205	7.50282	6.24605e-14	5.61364e-12	CFAP107	93190	5.59117	5.42624	5.80299	4.83516	5.15519	5.13419	5.22645	5.48806	5.17491	6.48451	6.6601	6.59542	5.8374	5.8107	6.11915	4.83516	4.83516	4.83516	5.6639	5.57965	5.52058	5.47977	5.74497	5.77044	5.85927	6.48256	6.20273	6.65143	5.79464	5.56891	CFAP107	93190	3.55794		3.4417		0.792503		2.5578		1.76173
ENSG00000116604	2976.51	-0.157516	0.0210021	-7.50002	6.38072e-14	5.71006e-12	MEF2D	4209	11.3561	11.4048	11.3353	11.5025	11.4963	11.5398	11.5292	11.5373	11.6154	11.5341	11.4768	11.4514	11.3962	11.3821	11.4704	11.6528	11.6148	11.6799	11.7759	11.6953	11.7617	11.5839	11.5168	11.604	11.7329	11.5961	11.6327	11.5375	11.7258	11.7113	MEF2D	4209	-0.0848799	0.9999	-0.263048	0.108518	-0.151687	0.450754	-0.263081	0.195626	-0.140735
ENSG00000175985	5464.76	-0.410855	0.0548007	-7.49726	6.51657e-14	5.80671e-12	PLEKHD1	400224	11.293	11.4364	11.5843	11.7928	11.7753	11.8143	11.7011	11.7521	11.8107	12.9691	12.979	13.1326	10.8103	10.9144	11.5208	12.0628	11.9375	12.0449	13.5481	13.3223	13.4582	11.7785	11.5759	11.7692	13.1296	12.7638	12.7543	12.7861	13.1188	13.2577	PLEKHD1	400224	-0.259928	0.990428	-0.448876	0.00211499	-0.602425	0.0494368	-0.420952	0.35473	-0.40812
ENSG00000099822	2657.86	-0.331708	0.0442984	-7.48804	6.99077e-14	6.20275e-12	HCN2	610	11.4132	11.4598	11.2008	11.733	11.6694	11.5845	11.0957	11.2779	11.3103	11.4642	11.5228	11.4766	11.3612	11.0744	11.1287	11.2678	11.6781	11.5272	11.9484	11.6811	11.8669	11.4166	11.5554	11.6622	11.2538	10.8524	10.6787	10.9111	11.1232	11.1165	HCN2	610	-0.270293	0.968349	-0.0958403	0.755264	-0.359174	0.256016	-0.356007	0.399121	-0.361035
ENSG00000058668	5519.12	0.352501	0.0470952	7.48486	7.16222e-14	6.32794e-12	ATP2B4	493	12.5079	12.4569	12.4971	12.115	12.2616	12.2144	12.2738	12.2097	12.2822	12.412	12.2027	12.3426	12.584	12.6008	12.5887	12.0153	11.9632	12.2601	11.8126	11.8047	11.5795	12.3861	11.9842	12.1655	12.7326	13.1406	13.2405	13.125	12.9093	12.9667	ATP2B4	493	0.177191	0.9999	0.3069	0.371896	0.410895	0.459937	0.591974	0.351115	0.294757
ENSG00000146648	291.102	0.591057	0.0790444	7.47753	7.57306e-14	6.6627e-12	EGFR	1956	9.01524	8.82052	8.72641	8.32603	8.46097	8.38383	8.39085	8.26289	8.37226	8.75414	8.3674	8.7338	9.16558	9.33628	9.24077	7.96825	7.64347	7.98311	8.51039	8.53301	8.45203	8.51687	8.12784	8.38982	7.25385	7.84349	8.02893	7.71425	7.53874	7.3902	EGFR	1956	0.580804	0.119601	0.289672	0.722186	1.02476	1.34897e-07	0.15387	0.829987	0.620078
ENSG00000132196	534.63	-0.588301	0.0786942	-7.47579	7.67403e-14	6.72316e-12	HSD17B7	51478	8.79245	8.87649	8.88293	9.98896	9.96963	9.84385	9.49481	9.39731	9.49971	8.55327	8.26782	8.44481	8.63802	8.67991	8.61844	10.0344	10.2685	10.0854	8.91586	8.74748	8.45882	8.80208	9.09567	8.81883	9.03505	8.79415	8.54661	8.88605	9.20128	9.08831	HSD17B7	51478	-0.708449	0.00324283	-0.971808	2.4248e-05	-0.30076	0.293551	-0.339154	0.37657	-0.406345
ENSG00000151012	183.745	0.708718	0.0951909	7.44523	9.67768e-14	8.40789e-12	SLC7A11	23657	7.55052	6.77586	6.93184	6.29545	6.5941	6.69152	6.60451	6.31386	6.45191	8.06776	8.2836	8.11823	8.73064	8.89114	8.76929	6.43872	5.97479	6.23804	7.53135	7.62583	7.62496	8.2936	7.63671	8.33496	8.31713	8.81134	8.68889	8.87474	8.34485	8.21749	SLC7A11	23657	0.466055	0.9999	0.904331	0.195223	0.800396	0.269397	0.720339	0.514892	0.580512
ENSG00000169241	501.982	-0.364829	0.0489988	-7.44566	9.64618e-14	8.40789e-12	SLC50A1	55974	8.41019	8.6788	8.51799	8.89948	8.93198	8.8228	8.80814	8.94402	8.77123	9.25934	9.1418	9.29799	8.66673	8.52171	8.82818	9.11331	9.23935	9.01497	9.52216	9.59644	9.61011	8.8392	9.22733	9.02276	9.65894	9.32278	9.0983	9.44535	9.62611	9.54816	SLC50A1	55974	-0.311034	0.964464	-0.409176	0.259282	-0.405643	0.256108	-0.373435	0.46153	-0.344303
ENSG00000168291	2340.53	-0.183753	0.0247065	-7.4374	1.02682e-13	8.88395e-12	PDHB	5162	11.085	11.0367	11.1561	11.3525	11.2793	11.2553	11.2526	11.3396	11.2939	11.2292	11.1917	11.1976	10.9499	10.9679	11.0334	11.4294	11.512	11.4785	11.4166	11.2469	11.3134	11.1476	11.3034	11.2099	11.2618	11.0981	10.9929	11.1271	11.2629	11.1837	PDHB	5162	-0.17611	0.735257	-0.250512	0.186942	-0.240887	0.058878	-0.125203	0.620398	-0.169994
ENSG00000132199	149.305	1.11036	0.149497	7.4273	1.10839e-13	9.55003e-12	ENOSF1	55556	7.07073	6.70528	6.45643	5.86185	5.87604	6.00141	6.79468	6.87069	6.39171	7.44693	8.1435	7.83169	8.28068	8.38115	8.52983	6.58051	6.62743	6.15858	6.88204	7.02345	7.39913	7.15617	7.21006	7.46523	8.1975	8.68724	9.52565	8.45723	7.86213	8.29273	ENOSF1	55556	0.418723	0.9999	1.38097	0.0544088	1.44857	0.0106934	0.990789	0.228673	0.967748
ENSG00000177000	1820.51	-0.278696	0.0375362	-7.42472	1.13018e-13	9.69769e-12	MTHFR	4524	10.6578	10.7222	10.5556	11.0098	11.1375	11.1435	10.8926	10.8953	10.9287	10.3944	10.242	10.3396	10.5637	10.5657	10.5129	11.3219	11.3074	11.2856	10.5684	10.4474	10.4143	10.6639	10.7374	10.5909	11.2022	11.1211	11.0257	11.0762	11.3881	11.3332	MTHFR	4524	-0.405186	0.000728307	-0.394316	0.0336202	-0.118721	0.461831	-0.158238	0.455306	-0.243897
ENSG00000171700	265.248	-0.401564	0.0540969	-7.42306	1.14445e-13	9.77992e-12	RGS19	10287	8.3109	8.31532	8.00723	8.60126	8.51235	8.52153	7.93012	8.2769	8.202	8.25901	8.24382	8.1747	8.51705	8.18331	8.29875	8.36922	8.52774	8.37837	8.70241	8.52078	8.525	8.78791	8.87633	8.91514	7.8948	7.56161	7.62596	7.6805	7.85358	7.75	RGS19	10287	-0.32179	0.540481	-0.501001	0.394507	-0.600643	6.11989e-05	-0.426874	0.0440307	-0.279735
ENSG00000250510	1803.22	-0.284906	0.0384478	-7.41019	1.26118e-13	1.07334e-11	GPR162	27239	10.9754	10.966	10.8299	11.1247	11.0595	11.1638	10.6101	10.7358	10.6981	10.4437	10.3426	10.2464	11.0654	11.0059	11.0662	10.7568	10.9633	10.7469	10.6804	10.5676	10.6784	11.288	11.5296	11.5435	10.9018	10.4597	10.4536	10.4371	10.7081	10.6914	GPR162	27239	-0.14228	0.962613	-0.436612	0.0381184	-0.419258	0.000418762	-0.309723	0.0501777	-0.336285
ENSG00000143507	242.409	0.769035	0.103832	7.40654	1.29632e-13	1.09877e-11	DUSP10	11221	9.0767	9.0851	9.15246	8.74969	8.7636	8.81886	8.09719	8.30453	8.60355	8.43841	8.22758	8.30674	8.51389	8.49809	8.29875	8.21954	8.23533	8.28541	7.70095	7.5666	7.6849	7.12529	7.27446	7.41214	6.74216	7.56161	7.55465	7.72933	6.95034	7.03374	DUSP10	11221	0.138006	0.9999	0.673075	0.0800763	1.50294	4.03114e-16	0.849897	0.000108696	1.02752
ENSG00000185105	65.9854	-0.826769	0.111733	-7.39951	1.36683e-13	1.15384e-11	MYADML2	255275	6.72114	6.75278	6.70438	7.12989	7.28767	7.24221	7.0352	7.19654	7.00773	6.38742	6.46246	6.50217	6.02966	5.86754	5.81895	7.21485	7.56044	7.67369	7.03973	7.42657	7.4135	6.63818	6.3115	6.33112	6.68103	6.49548	6.27434	6.48887	6.60751	6.75507	MYADML2	255275	-0.582131	0.460418	-0.335604	0.77301	-1.21157	0.0020891	-1.4221	1.70597e-05	-0.479619
ENSG00000135617	403.792	-0.410436	0.0554954	-7.39585	1.40502e-13	1.18129e-11	PRADC1	84279	8.69487	8.60834	8.6682	8.9346	8.97724	9.0649	8.92604	9.26734	9.02215	9.03067	8.75939	8.85897	8.18828	8.03102	8.3419	9.45586	9.5538	9.26953	9.24693	9.08239	9.20647	8.33333	8.5732	8.72837	8.77373	8.34293	8.06265	8.36957	8.72231	8.59239	PRADC1	84279	-0.379246	0.53138	-0.592982	0.178979	-0.428745	0.0819755	-0.325921	0.350306	-0.509425
ENSG00000012822	1182.32	0.437233	0.0591553	7.39126	1.45442e-13	1.21791e-11	CALCOCO1	57658	10.2781	10.2384	10.2644	9.98896	9.94298	10.0185	10.147	10.3452	10.086	10.3916	10.4643	10.6207	10.3265	10.3936	10.3527	10.1102	10.0791	9.85587	9.81906	10.1024	10.0352	9.6239	9.75783	9.67967	10.6031	10.7674	11.2096	10.7	10.372	10.4086	CALCOCO1	57658	0.191281	0.772059	0.272943	0.129472	0.710405	5.60935e-11	0.52746	1.70597e-05	0.454032
ENSG00000124588	1117.35	-0.245147	0.0331913	-7.38589	1.5144e-13	1.26307e-11	NQO2	4835	9.97411	10.0703	9.93624	10.2133	10.1417	10.1305	9.9698	9.98541	10.0079	10.3719	10.3813	10.5418	10.1474	10.1836	10.1298	10.0979	10.3153	10.0877	10.7044	10.7177	10.7531	10.369	10.5999	10.4169	9.97823	9.75017	9.62422	9.68123	9.82369	9.86974	NQO2	4835	-0.187746	0.923354	-0.247807	0.39573	-0.323196	0.0502573	-0.303765	0.14014	-0.22267
ENSG00000196821	2409.68	-0.230768	0.0312814	-7.37716	1.617e-13	1.34327e-11	ILRUN	64771	11.1798	11.2025	11.245	11.4473	11.511	11.567	11.2799	11.2942	11.3229	11.1767	11.1335	11.0126	11.1739	11.1924	11.1644	11.4427	11.3512	11.5145	11.396	11.3294	11.2623	11.4677	11.5328	11.4511	11.0485	10.9632	10.7561	11.0405	11.1435	11.0761	ILRUN	64771	-0.136448	0.957215	-0.0719751	0.777403	-0.311083	0.010959	-0.227992	0.181646	-0.171811
ENSG00000103769	6570.58	-0.220312	0.0298826	-7.3726	1.67327e-13	1.3845e-11	RAB11A	8766	12.6479	12.6459	12.7935	12.9932	12.9482	12.9578	12.7342	12.6895	12.7762	12.3961	12.386	12.4537	12.4338	12.4387	12.5531	12.8826	12.8126	12.9216	12.7415	12.653	12.5401	12.7563	12.8062	12.6085	12.7494	12.6	12.3963	12.6706	12.756	12.7749	RAB11A	8766	-0.135541	0.791477	-0.15287	0.311782	-0.248776	0.00885117	-0.238715	0.0310439	-0.203931
ENSG00000270885	2436.67	-0.386678	0.0525326	-7.36072	1.82915e-13	1.5075e-11	RASL10B	91608	10.8681	11.0751	10.9021	11.3617	11.3465	11.4276	11.017	11.1731	11.1448	11.5124	11.4035	11.5055	11.1248	11.1719	11.2949	11.1967	11.3347	11.4009	11.9389	11.7175	11.8368	11.6122	11.6028	11.8167	10.9872	10.6507	10.0946	10.7073	10.9896	10.7864	RASL10B	91608	-0.199522	0.994683	-0.10119	0.719578	-0.488375	0.0406456	-0.367095	0.276695	-0.429739
ENSG00000265972	2196.97	0.642294	0.0873454	7.3535	1.93089e-13	1.58508e-11	TXNIP	10628	11.1927	10.755	10.9454	10.1316	10.1632	10.0116	10.7757	10.9042	10.9693	11.3625	11.1834	11.409	11.4645	11.3431	11.3743	10.4926	10.2501	10.4378	10.9083	10.9666	10.795	10.6061	10.6251	10.6128	11.6878	11.7065	12.7703	11.5376	11.3358	11.6451	TXNIP	10628	0.510954	0.306578	0.364803	0.0767869	0.805703	0.000572108	0.439638	0.210138	0.547043
ENSG00000215218	1482.55	-0.281536	0.0383222	-7.34655	2.03384e-13	1.66304e-11	UBE2QL1	134111	10.9108	10.9672	10.8059	11.2016	11.1046	11.1086	10.0468	10.1246	10.1899	9.98854	10.0005	10.1363	11.046	11.0041	10.9389	10.348	10.3381	10.3513	10.3268	10.3146	10.2625	11.3755	11.481	11.349	9.97024	9.70168	9.44002	9.80423	9.89393	9.74674	UBE2QL1	134111	-0.228065	0.305143	-0.253044	0.213213	-0.412757	3.92474e-06	-0.272464	0.0342117	-0.233208
ENSG00000176887	6586.18	0.457301	0.0624075	7.32766	2.34206e-13	1.89854e-11	SOX11	6664	13.1406	13.1909	13.163	12.8836	12.8807	12.881	12.8961	12.8422	12.9805	12.7369	12.8093	12.5644	13.1547	13.0105	12.8526	12.8041	12.6506	12.7358	12.1812	12.1052	12.059	12.0632	12.2583	12.2146	11.8719	12.6611	12.6745	12.5534	12.4337	12.3622	SOX11	6664	0.181971	0.8784	0.502124	3.42125e-08	0.840913	1.77275e-12	0.5958	8.87001e-06	0.388026
ENSG00000145050	1217.07	-0.372624	0.0508545	-7.32725	2.34915e-13	1.89854e-11	MANF	7873	10.3186	10.3519	10.3313	10.6403	10.6358	10.7722	10.0206	10.2068	10.2868	10.2739	9.96692	10.0989	9.79545	9.71403	9.99108	10.5087	10.7162	10.5058	10.4317	10.3338	10.3594	10.1962	10.6119	10.373	10.4018	9.98288	10.232	10.1272	10.2793	10.3148	MANF	7873	-0.414869	0.0213672	-0.488876	0.126261	-0.593254	4.83485e-06	-0.26879	0.191985	-0.231066
ENSG00000106554	1126.55	-0.250562	0.0341916	-7.32817	2.33322e-13	1.89854e-11	CHCHD3	54927	9.86658	9.82161	10.0058	10.0677	10.064	10.0473	9.90764	10.0085	10.0432	10.0935	10.1099	10.1257	9.83881	9.92131	10.0731	10.1102	10.2408	10.0081	10.4435	10.5026	10.3756	10.2505	10.3387	10.2488	10.6163	10.4095	10.3304	10.4877	10.6255	10.659	CHCHD3	54927	-0.137252	0.9999	-0.0613733	0.912336	-0.346788	0.095544	-0.349068	0.173393	-0.234597
ENSG00000197785	1220.66	-0.314005	0.0429043	-7.31872	2.5035e-13	2.01546e-11	ATAD3A	55210	10.0827	10.111	10.0987	10.2031	10.1826	10.3424	10.064	10.2122	10.2515	10.5809	10.3813	10.5445	9.92061	9.80713	10.1074	10.3072	10.4807	10.3887	10.8274	10.7428	10.9563	10.2977	10.4825	10.4886	10.3723	10.0461	9.90828	10.057	10.3333	10.2343	ATAD3A	55210	-0.219234	0.877215	-0.272279	0.476022	-0.496298	0.0026536	-0.352811	0.105109	-0.32784
ENSG00000185262	1009.44	0.424255	0.0580328	7.31061	2.65923e-13	2.1326e-11	UBALD2	283991	10.2191	10.3643	9.9798	10.0495	9.77415	9.76024	9.77114	10.1625	10.0818	10.2979	10.478	10.4024	10.4006	10.2544	10.2855	9.6811	9.80666	9.86918	10.0542	9.85586	9.84476	9.78197	9.7226	10.05	10.0289	10.2756	10.2009	10.3428	9.68199	9.56714	UBALD2	283991	0.250989	0.739609	0.668145	0.0247215	0.48364	0.00243466	0.495338	0.00492008	0.525621
ENSG00000058335	1081.13	-0.399598	0.0547452	-7.29923	2.89425e-13	2.31219e-11	RASGRF1	5923	10.2499	10.3465	10.32	10.6688	10.8261	10.7661	10.3169	10.2338	10.1481	10.3972	10.4278	10.3638	9.58983	9.5539	9.13163	10.3702	10.3468	10.5379	10.6804	10.572	10.7489	9.95421	10.1856	9.93742	9.24567	9.02996	8.63601	8.95906	9.27429	9.27269	RASGRF1	5923	-0.190644	0.802722	-0.340859	0.272873	-0.628398	1.27742e-07	-0.284854	0.0940738	-0.422205
ENSG00000006042	371.16	0.494165	0.0677187	7.29732	2.93552e-13	2.3362e-11	TMEM98	26022	9.66163	9.48538	9.3901	9.1376	9.22579	9.00377	8.45348	8.61649	8.59761	8.84284	8.73102	8.75236	8.40206	8.3663	8.68375	8.30257	8.36513	8.34037	8.49099	8.35829	8.37511	7.56177	7.94684	7.86094	8.73806	8.82603	9.27743	8.96534	8.38468	8.61612	TMEM98	26022	0.267645	0.997167	0.0421135	0.967994	0.8502	0.00687504	0.4246	0.433774	0.502543
ENSG00000159164	18124.8	-0.224505	0.030781	-7.29361	3.01764e-13	2.39242e-11	SV2A	9900	14.214	14.1956	14.1349	14.4728	14.4076	14.3898	14.1541	14.2635	14.2858	13.6232	13.5925	13.5135	14.3398	14.2012	14.1772	14.3871	14.4395	14.4523	14.0138	13.7742	13.7456	14.373	14.4631	14.399	14.0924	13.9053	13.654	13.9146	14.1124	14.0119	SV2A	9900	-0.186434	0.292906	-0.221642	2.50876e-05	-0.168319	0.0958337	-0.275141	0.00374601	-0.246715
ENSG00000144118	1993.48	-0.233066	0.0319838	-7.28699	3.16947e-13	2.50328e-11	RALB	5899	11.0373	11.0708	11.1295	11.3367	11.3101	11.2632	10.9384	10.8437	10.9943	10.5222	10.505	10.5445	10.7408	10.7908	10.7211	11.0804	11.0477	11.0218	10.8876	10.8919	10.7803	10.9152	11.0457	10.9913	11.3059	11.1096	10.8705	11.2153	11.3045	11.2789	RALB	5899	-0.122766	0.98067	-0.0843107	0.798264	-0.23826	0.0872747	-0.343333	0.0159902	-0.231769
ENSG00000166317	36.9551	1.00079	0.13735	7.28643	3.18272e-13	2.50426e-11	SYNPO2L	79933	5.98882	5.59479	5.96254	5.52749	5.54506	5.6181	6.04093	5.99109	5.6581	7.20616	6.83027	7.43594	6.71562	6.82599	6.48154	5.70804	5.87978	5.68929	6.62743	6.67163	6.83226	5.8423	6.28397	6.07368	6.26652	6.79039	6.99413	6.70436	6.17987	6.20169	SYNPO2L	79933	0.444827	0.9999	0.737913	0.306791	1.2384	0.417638	0.749487		1.17616
ENSG00000084070	4107.6	-0.183055	0.0251368	-7.28237	3.28e-13	2.5711e-11	SMAP2	64744	11.9451	11.9955	12.0682	12.1516	12.1306	12.1494	12.1546	12.0874	12.1656	11.8306	11.8136	11.7795	11.81	11.783	11.7501	12.141	12.2552	12.2495	12.0838	12.0029	12.0534	12.013	12.0933	12.0345	12.1316	11.8752	11.8289	12.0119	12.0665	12.0522	SMAP2	64744	-0.0758803	0.98067	-0.302427	0.002037	-0.266898	0.000266175	-0.244063	0.00355133	-0.182101
ENSG00000168993	5325.18	-0.438472	0.0602232	-7.28078	3.31898e-13	2.59191e-11	CPLX1	10815	11.6868	11.7679	11.6184	11.923	11.9041	12.0074	12.28	12.5545	12.4049	12.3708	12.2292	12.4824	10.9951	10.8661	11.3469	12.6876	12.9415	12.7959	12.9769	12.6209	12.9585	11.5127	11.5906	11.867	13.198	12.8742	12.3636	12.8368	13.2106	13.0275	CPLX1	10815	-0.393187	0.459291	-0.202768	0.412646	-0.590138	0.00541851	-0.502644	0.0480601	-0.442831
ENSG00000188869	108.031	0.6376	0.0876181	7.27703	3.41241e-13	2.65493e-11	TMC3	342125	6.87676	6.75278	6.75327	6.60432	6.66143	6.59483	6.93379	6.65907	6.76048	7.96525	7.89811	8.41591	7.94583	8.04981	8.25835	6.70736	6.43926	6.65085	7.3229	7.55445	7.49665	7.59531	7.62703	7.59435	6.60891	7.21399	7.07214	7.33455	6.75213	6.81135	TMC3	342125	0.320896	0.9999	0.739784	0.0851571	0.62637	0.290042	0.845623	0.205807	0.773649
ENSG00000153094	269.454	0.689753	0.0948156	7.27468	3.4724e-13	2.69156e-11	BCL2L11	10018	8.69487	8.75685	8.7321	7.79849	8.32698	8.27249	8.37243	8.55475	8.62123	8.12315	8.35252	8.0594	8.57882	8.53171	8.29875	8.18627	7.95201	8.45855	7.71231	7.92701	7.79754	7.53894	7.35974	7.31103	8.34444	8.76796	9.22561	8.73595	8.29448	8.53913	BCL2L11	10018	0.379206	0.383645	0.609524	0.101495	1.36694	1.71779e-16	0.453167	0.0786608	0.604893
ENSG00000170873	2868.38	0.249327	0.03433	7.26264	3.79608e-13	2.93155e-11	MTSS1	9788	12.2398	12.2556	12.2657	12.0903	12.0962	12.062	11.6789	11.6221	11.693	11.0464	11.0376	10.9051	11.3218	11.2732	11.0921	11.6093	11.4448	11.5864	10.7578	10.634	10.5782	10.9452	10.8799	10.8303	11.3342	11.6658	11.5331	11.6866	11.4813	11.3063	MTSS1	9788	0.123177	0.9999	0.196493	0.457151	0.35913	0.117763	0.348418	0.236253	0.256127
ENSG00000140807	433.423	0.472138	0.0651025	7.25222	4.10008e-13	3.15464e-11	NKD1	85407	9.45264	9.06336	8.9817	9.03044	9.05605	9.0649	8.70921	8.65444	8.78697	9.5769	9.47108	9.51685	8.83794	8.79772	8.79764	8.30257	8.1736	8.48662	9.36837	9.15912	9.04955	8.26648	8.12784	8.42176	8.52984	9.24051	9.02881	9.27088	8.61785	8.44602	NKD1	85407	0.463976	0.314511	-0.175282	0.792808	0.625869	0.00364637	0.352203	0.271126	0.735268
ENSG00000169427	541.292	-0.546808	0.0754472	-7.24757	4.24328e-13	3.25282e-11	KCNK9	51305	9.31748	9.31208	8.99121	9.83061	9.82219	9.72287	9.47778	9.37807	9.46437	9.11101	8.73102	9.30428	8.26192	8.04045	7.90125	9.66682	9.80161	9.9984	9.69803	9.78384	9.67825	8.91068	8.89628	8.83862	8.5393	8.51354	8.51509	8.55575	8.60023	8.68999	KCNK9	51305	-0.411814	0.829642	-0.125141	0.796047	-0.945227	0.00148516	-0.711125	0.0506019	-0.099252
ENSG00000132688	2415.73	0.775324	0.107308	7.22521	5.00316e-13	3.81771e-11	NES	10763	12.8595	11.9701	11.8633	10.9802	10.9341	10.9216	10.0118	10.1903	10.0987	11.9767	11.7601	11.8937	11.2415	11.2352	11.3087	9.39358	9.54173	9.47527	11.2517	11.4254	11.3374	10.5276	10.4013	10.4416	11.4238	11.2564	12.2406	11.2802	10.8696	11.344	NES	10763	0.67823	0.679283	0.840343	4.76253e-08	0.833137	0.0759677	0.54796	0.473484	0.435983
ENSG00000111653	1136.84	0.319282	0.0441923	7.22484	5.0168e-13	3.81771e-11	ING4	51147	10.5259	10.5395	10.4615	10.3079	10.1417	10.2477	10.2332	10.2515	10.2249	10.2663	10.1446	10.0715	10.3913	10.3707	10.3986	10.145	10.1662	10.3031	9.8772	9.61374	9.7069	9.83561	10.0572	9.89094	10.2852	10.5016	10.4519	10.4796	10.0786	10.0965	ING4	51147	0.0374874	0.9999	0.198425	0.629961	0.482016	0.000268129	0.450989	0.00316777	0.33226
ENSG00000163931	5749.75	-0.247956	0.0343558	-7.21729	5.30353e-13	4.02123e-11	TKT	7086	12.4375	12.5159	12.4137	12.7747	12.7136	12.7629	12.4628	12.6008	12.6445	12.499	12.5611	12.3858	12.1119	12.1147	12.32	12.6996	12.8204	12.7858	12.792	12.5138	12.6175	12.4012	12.5118	12.5083	12.4315	12.1678	12.0012	12.24	12.4825	12.3487	TKT	7086	-0.193958	0.291446	-0.228954	0.186942	-0.289318	0.00116273	-0.165141	0.213084	-0.288254
ENSG00000052841	1940.72	0.195403	0.027089	7.21335	5.45901e-13	4.12413e-11	TTC17	55761	11.2518	11.2114	11.3483	11.0191	11.07	11.0908	10.9368	10.8885	10.924	10.9783	11.0422	11.1108	11.0761	11.1091	11.0339	10.8152	10.6489	10.8228	10.8765	11.0031	10.8461	10.8879	10.8281	10.8075	10.7101	10.8635	11.0473	10.9082	10.7073	10.7753	TTC17	55761	0.160179	0.216043	0.107759	0.770555	0.242699	9.11585e-05	0.135812	0.15799	0.212441
ENSG00000110514	6961.7	-0.191665	0.0265899	-7.20818	5.67039e-13	4.26835e-11	MADD	8567	12.7027	12.6855	12.7199	12.8568	12.9003	12.8599	12.8049	12.8133	12.8054	12.4009	12.3609	12.3585	12.5725	12.6012	12.6502	12.9096	12.9752	12.9413	12.6935	12.5524	12.5974	12.8781	12.7757	12.8738	12.9655	12.9799	12.6714	12.9106	13.0909	13.0339	MADD	8567	-0.130481	0.514901	-0.198509	0.0679815	-0.23364	0.000724824	-0.24578	0.00116968	-0.174323
ENSG00000159314	211.086	0.766194	0.106319	7.20653	5.73948e-13	4.30482e-11	ARHGAP27	201176	8.41019	8.33733	8.15106	7.719	7.79884	7.96297	7.81118	8.37133	7.72991	8.12992	7.80208	8.05188	9.2904	9.20752	8.6468	7.80154	7.95201	7.54408	7.05817	7.35785	7.3401	7.89253	7.93909	7.90713	7.59747	7.95854	8.13611	7.83887	7.50421	7.51006	ARHGAP27	201176	0.298265	0.913669	1.59335	9.62513e-05	1.37243	2.81586e-13	1.00019	7.13455e-05	0.57369
ENSG00000188211	1528.31	-0.510023	0.0708171	-7.20198	5.93464e-13	4.43524e-11	NCR3LG1	374383	10.006	9.85986	10.2506	10.8448	11.0091	10.9124	10.6861	10.4517	10.522	10.1622	9.89992	10.1882	10.0821	10.0846	10.1746	11.2008	10.8008	11.17	10.6299	10.5134	10.3043	10.7319	10.0938	10.4532	10.9482	10.8195	10.8747	10.826	11.2919	11.2874	NCR3LG1	374383	-0.524296	0.275378	-0.684921	0.257652	-0.347089	0.270077	-0.419218	0.262944	-0.357415
ENSG00000006744	2245.38	-0.153067	0.0212999	-7.18631	6.65678e-13	4.95716e-11	ELAC2	60528	11.0351	11.0444	11.0341	11.1557	11.151	11.2012	11.377	11.3876	11.3548	11.2654	11.1539	11.1841	10.8039	10.8423	10.9383	11.458	11.5174	11.4487	11.396	11.3003	11.3365	11.0681	11.0511	11.0592	11.1322	10.9242	10.9141	10.9771	11.1461	11.03	ELAC2	60528	-0.099226	0.90478	-0.0632	0.841572	-0.199498	0.0171449	-0.14676	0.208234	-0.173321
ENSG00000157087	3161.52	-0.372874	0.0519433	-7.17849	7.04848e-13	5.22624e-11	ATP2B2	491	10.9382	11.0598	10.9708	11.2381	11.3881	11.3392	11.4562	11.4911	11.4148	11.7382	11.4353	11.8107	10.9764	10.8818	11.0226	11.6618	11.6545	11.8586	12.2702	12.1567	12.195	11.3461	11.1084	11.3565	12.1671	12.0269	11.5489	12.1382	12.385	12.3308	ATP2B2	491	-0.274023	0.9999	-0.333363	0.256727	-0.31804	0.632758	-0.547294	0.46153	-0.375991
ENSG00000115525	2201.8	-0.264513	0.0368499	-7.17811	7.06824e-13	5.22624e-11	ST3GAL5	8869	11.0818	11.1715	11.1915	11.3404	11.3434	11.4296	11.2651	11.1768	11.3175	11.0631	11.0548	11.0174	10.8984	10.9489	11.0196	11.2935	11.3735	11.4101	11.4445	11.2395	11.2232	11.3613	11.397	11.2915	10.846	10.6021	10.3504	10.6898	10.8612	10.8434	ST3GAL5	8869	-0.102874	0.958218	-0.3664	0.00840568	-0.400909	4.29509e-07	-0.268798	0.00674437	-0.30777
ENSG00000146083	4457.44	0.2092	0.0291853	7.16798	7.61098e-13	5.60765e-11	RNF44	22838	12.2961	12.4519	12.345	12.1324	12.1967	12.1661	12.1626	12.1965	12.1561	12.1145	12.197	12.2114	12.364	12.3858	12.43	12.0399	11.9917	12.0687	11.9839	11.8412	12.011	11.9947	12.0223	12.1387	11.996	12.137	11.9853	12.0992	11.9886	11.8493	RNF44	22838	0.144716	0.985105	0.252904	0.0841887	0.347626	0.035402	0.229225	0.367702	0.127577
ENSG00000104313	166.25	0.7184	0.100395	7.15574	8.3225e-13	6.1103e-11	EYA1	2138	8.13931	8.45602	8.70341	7.95496	8.12849	8.05372	7.45098	7.60084	7.55412	8.36592	8.1435	8.60174	7.90752	7.9178	7.56906	6.91095	7.02866	7.25794	7.6895	8.09417	7.96078	6.66083	6.88236	6.78914	7.08216	7.61335	7.48477	7.70054	7.24121	7.37761	EYA1	2138	0.688437	0.130225	0.319237	0.616994	1.50061	4.53204e-10	0.561615	0.0745673	0.509178
ENSG00000143067	1890.79	0.341355	0.0477322	7.15147	8.5856e-13	6.28134e-11	ZNF697	90874	11.1475	11.1623	11.3556	10.9956	11.1193	11.036	10.612	10.7333	10.7682	11.5322	11.4545	11.4364	11.2603	11.3103	11.2007	10.5034	10.5621	10.6408	11.0806	11.0118	10.9334	10.7331	10.5986	10.7679	10.1249	10.4776	10.7585	10.4573	10.2957	10.3431	ZNF697	90874	0.149153	0.843058	0.698778	2.54227e-05	0.575423	1.34406e-10	0.474862	1.25757e-06	0.321533
ENSG00000134198	821.427	0.473459	0.0662365	7.148	8.80498e-13	6.41933e-11	TSPAN2	10100	10.5085	10.6293	10.7173	10.281	10.3773	10.2608	9.80905	9.67465	9.61555	9.91276	9.81625	9.49503	10.6649	10.758	10.3441	9.43352	9.31225	9.37046	9.21588	9.32248	9.13227	10.214	9.94899	10.1258	6.97261	7.62599	7.14237	7.70207	7.21186	7.10016	TSPAN2	10100	0.357803	0.429021	0.513185	0.101495	0.525189	0.00291035	0.568181	0.00477943	0.59892
ENSG00000262001	31.9623	0.990633	0.138612	7.1468	8.8825e-13	6.45327e-11	NA	NA	6.3663	5.89771	6.25614	5.74471	5.47137	5.67074	5.61077	5.63149	5.83654	6.38742	6.55118	6.7231	6.95183	6.95707	6.87534	5.5291	5.77342	5.53587	6.12066	6.31249	6.56096	6.13112	6.36461	6.04071	6.20711	6.72123	6.84844	6.61366	6.28611	6.17971	NA	NA	0.296798	0.9999	1.17355	0.122032	1.40724	0.113796	0.423316		0.980035
ENSG00000184368	8616.81	-0.239965	0.0336106	-7.13956	9.36319e-13	6.77889e-11	MAP7D2	256714	13.1419	13.148	13.1298	13.4485	13.5238	13.4406	13.2705	13.2024	13.2836	12.8232	12.9709	12.7663	11.7052	11.6029	11.7139	13.3519	13.4436	13.3979	13.3918	13.1691	13.1442	11.8476	11.8393	11.8794	13.5577	13.4027	13.2521	13.3327	13.4025	13.4797	MAP7D2	256714	-0.14164	0.9999	-0.0559969	0.796047	-0.180336	0.68111	-0.387332	0.366416	-0.154822
ENSG00000070729	349.203	0.503776	0.0705778	7.13789	9.4777e-13	6.83804e-11	CNGB1	1258	9.56705	9.52721	9.40083	9.29242	9.26278	9.2863	8.57103	8.80172	8.81793	8.59284	8.39668	8.46751	8.53586	8.42479	8.44975	8.38101	8.1336	8.21987	7.96977	8.35139	8.33872	7.82863	8.07241	7.9371	8.16226	8.93626	8.36182	8.84163	8.12106	8.05513	CNGB1	1258	0.575951	0.311882	-0.276711	0.607723	0.63568	0.0310865	0.305776	0.605348	0.735017
ENSG00000121671	2063.72	-0.220421	0.0309392	-7.12431	1.046e-12	7.52076e-11	CRY2	1408	10.9394	11.021	10.9527	11.2599	11.2891	11.2073	10.827	10.9688	10.8772	11.0032	11.041	10.9277	11.0313	10.9837	11.0184	11.0911	11.1916	11.1073	11.2772	11.1456	11.2002	11.2239	11.171	11.2865	10.9345	10.8771	10.611	10.8995	11.0024	10.8787	CRY2	1408	-0.238391	0.0926878	-0.332535	0.0777775	-0.219056	0.0239402	-0.225084	0.0492768	-0.144085
ENSG00000203875	1334.28	0.241481	0.0338984	7.12367	1.0509e-12	7.53e-11	SNHG5	387066	10.6593	10.69	10.7287	10.5351	10.3227	10.4287	10.1578	10.3252	10.4516	11.0032	10.9823	11.0183	9.75074	9.78511	10.0008	10.1552	9.9976	9.96407	10.8196	10.727	10.837	9.66572	9.6424	9.6554	10.5233	10.6054	10.7084	10.6351	10.3431	10.4164	SNHG5	387066	0.295725	0.0167503	0.256493	0.564251	0.211504	0.0547445	0.211198	0.0711094	0.224879
ENSG00000166407	316.58	0.746585	0.104856	7.12007	1.07873e-12	7.70293e-11	LMO1	4004	8.63178	8.63812	8.52457	8.25601	8.01373	7.99152	8.1084	8.31135	8.19411	8.55828	8.5281	8.24884	9.28487	9.17185	9.29139	7.36866	7.53577	7.63607	7.43802	6.92961	7.60023	8.99528	9.29491	9.09685	8.54025	9.24224	8.74423	9.26631	8.43863	8.17773	LMO1	4004	0.896166	0.0162886	0.955029	0.221738	0.13069	0.804801	1.40976	6.62108e-07	0.811278
ENSG00000184524	5373.43	-0.419148	0.0589319	-7.11242	1.14028e-12	8.11468e-11	CEND1	51286	12.0122	12.2001	11.9078	12.4203	12.3418	12.3834	12.3441	12.5672	12.5254	12.6985	12.5791	12.6168	11.724	11.5655	11.8397	12.6036	12.8812	12.8022	13.0989	12.7973	12.9668	12.1145	12.4197	12.3988	12.4699	12.029	11.4707	12.109	12.4685	12.2966	CEND1	51286	-0.282023	0.449976	-0.254485	0.33544	-0.608718	8.8676e-06	-0.331335	0.0799272	-0.525097
ENSG00000092964	22697.5	-0.311405	0.0437899	-7.11134	1.14921e-12	8.15039e-11	DPYSL2	1808	14.5711	14.5991	14.6209	14.9991	15.0604	14.9568	14.543	14.5218	14.5983	13.8243	13.8353	13.7599	14.3885	14.3099	14.2683	14.8331	14.8387	14.8629	14.1809	13.9386	13.943	14.571	14.6963	14.5463	14.1339	14.2209	13.8482	14.1963	14.6568	14.5102	DPYSL2	1808	-0.286001	0.00609651	-0.262836	6.93966e-05	-0.280544	0.00163471	-0.220759	0.0448041	-0.353874
ENSG00000114302	4687.45	-0.227336	0.0319825	-7.10813	1.17626e-12	8.31398e-11	PRKAR2A	5576	12.1448	12.1215	12.1488	12.4317	12.4439	12.3731	12.067	12.0815	12.1924	11.8469	11.7981	11.8444	12.1629	12.1765	12.1934	12.2197	12.1239	12.2945	12.1952	12.0914	11.9989	12.5491	12.4577	12.4496	12.2765	12.2403	12.0067	12.287	12.4073	12.377	PRKAR2A	5576	-0.0956739	0.995764	-0.21626	0.110394	-0.308581	0.00480003	-0.272653	0.0391517	-0.175612
ENSG00000278540	5743.34	-0.394674	0.0555475	-7.10516	1.20185e-12	8.46614e-11	ACACA	31	12.3498	12.3419	12.4459	12.913	13.0023	12.9618	12.6504	12.526	12.6934	11.1155	11.1129	11.0644	12.1181	12.1317	12.2369	13.063	12.8117	13.1461	11.6453	11.1904	11.2043	12.6847	12.3272	12.5297	12.7432	12.7182	12.4442	12.812	13.1884	13.1024	ACACA	31	-0.38717	0.0169846	-0.357696	0.152075	-0.358445	0.00791298	-0.272603	0.140334	-0.361508
ENSG00000183780	858.49	-0.302292	0.0426661	-7.08507	1.38973e-12	9.75662e-11	SLC35F3	148641	9.56705	9.6517	9.66688	9.81189	9.80863	9.81059	9.56902	9.64008	9.74434	9.54209	9.59557	9.55952	8.9354	8.88077	8.96937	9.5652	9.84399	9.79856	10.0343	9.80407	9.95631	9.36925	9.23674	9.4679	10.7351	10.3425	10.3362	10.3295	10.5525	10.6945	SLC35F3	148641	-0.0832384	0.9999	-0.102972	0.819607	-0.47539	1.90643e-05	-0.396111	0.00128849	-0.343603
ENSG00000122779	2510.18	-0.327043	0.0461739	-7.08285	1.41215e-12	9.88078e-11	TRIM24	8805	11.4056	11.3003	11.2715	11.6147	11.6744	11.5711	11.4077	11.2856	11.4579	11.2843	11.2811	11.2628	10.908	10.9358	10.9547	11.4799	11.318	11.4915	11.8433	11.6374	11.6041	11.573	11.5084	11.484	10.9366	10.8255	10.6645	10.8122	11.0445	11.0563	TRIM24	8805	-0.042867	0.9999	-0.202524	0.457735	-0.600306	3.3856e-05	-0.432766	0.0140077	-0.254095
ENSG00000149925	17374.1	-0.326891	0.0461592	-7.08181	1.42279e-12	9.92197e-11	ALDOA	226	13.6875	13.741	13.621	14.1263	14.0356	14.0226	13.9021	14.021	14.0004	14.1134	14.0997	14.0416	13.7226	13.6782	13.904	14.2042	14.5399	14.4642	14.4131	14.1365	14.2398	13.9581	14.3072	14.1279	14.3746	14.0442	13.8215	14.2176	14.3473	14.1864	ALDOA	226	-0.430664	0.0368809	-0.251456	0.303604	-0.364598	0.0305423	-0.184475	0.56265	-0.27163
ENSG00000144711	5351.66	-0.195979	0.0276805	-7.08005	1.44103e-12	1.00156e-10	IQSEC1	9922	12.4354	12.4181	12.3469	12.5816	12.6962	12.6266	12.2892	12.2609	12.2739	12.5109	12.4253	12.391	12.3425	12.2757	12.3083	12.3475	12.2589	12.4105	12.697	12.6682	12.6433	12.5815	12.385	12.4938	12.2213	12.0992	11.9502	12.079	12.3692	12.3058	IQSEC1	9922	-0.0615663	0.9999	-0.285042	0.343937	-0.178405	0.378311	-0.230021	0.331621	-0.261657
ENSG00000139269	80.4022	0.847124	0.119745	7.07439	1.50111e-12	1.0398e-10	INHBE	83729	6.42831	6.16247	5.91243	5.80531	5.72789	5.67074	5.50884	5.9479	5.7813	8.44925	8.56076	8.39829	7.19296	7.18529	7.39798	5.70804	5.97479	5.92772	7.81055	7.42657	7.70817	6.86718	6.6809	7.11012	6.59712	7.00369	7.01313	7.07043	6.40489	6.23384	INHBE	83729	-0.300487	0.9999	1.0606	0.163109	0.56333	0.679352	1.00974	0.511401	1.06133
ENSG00000109436	9466.49	0.306735	0.0433612	7.07393	1.50601e-12	1.0398e-10	TBC1D9	23158	13.3235	13.4025	13.4141	13.2168	13.2578	13.2181	13.1672	13.1632	13.159	13.168	13.1784	12.9955	13.4436	13.4507	13.4412	13.0591	12.9233	13.1255	12.8452	12.706	12.6627	13.0407	12.8558	13.006	13.1937	13.6996	13.4158	13.7798	13.346	13.1894	TBC1D9	23158	0.130393	0.821868	0.234079	0.195171	0.481726	2.24334e-09	0.377472	3.1155e-05	0.395164
ENSG00000165629	4234.9	-0.208213	0.0294605	-7.06752	1.57727e-12	1.0854e-10	ATP5F1C	509	11.9416	11.9631	12.0405	12.264	12.1885	12.2099	12.0434	12.0378	12.1303	12.0412	12.0239	11.9922	11.6572	11.7246	11.8247	12.2041	12.2598	12.2165	12.3037	12.1964	12.1341	11.9636	12.1494	11.9791	12.2066	12.0035	11.8612	12.06	12.0454	12.1158	ATP5F1C	509	-0.152762	0.560424	-0.0453498	0.929994	-0.297682	0.000325247	-0.197923	0.0721304	-0.151628
ENSG00000126500	336.983	0.449057	0.0635499	7.06621	1.59217e-12	1.09205e-10	FLRT1	23769	8.63178	8.51506	8.36483	7.86319	8.15758	8.01256	8.05144	7.97485	7.8561	8.97947	9.06671	8.75236	9.33922	9.27236	9.27739	7.46229	7.51064	7.4744	8.43115	8.11885	8.42454	9.13974	9.06783	9.16104	8.56733	8.79257	9.07436	8.76726	8.63442	8.65225	FLRT1	23769	0.632416	0.0377097	0.860165	0.0348179	0.194183	0.459894	0.699102	0.000599305	0.29765
ENSG00000215271	325.242	-0.361597	0.0511788	-7.06537	1.6019e-12	1.09512e-10	HOMEZ	57594	8.21204	8.39442	8.6321	8.81581	8.7589	8.80298	8.73099	8.76259	8.91654	8.14338	8.09951	8.07434	8.03728	7.97309	8.13868	9.10272	9.06459	9.0435	8.68546	8.30926	8.27849	8.33333	8.25139	8.24846	8.68708	8.54009	8.46053	8.54233	8.98816	8.89472	HOMEZ	57594	-0.291266	0.604989	-0.573786	0.132752	-0.273002	0.21445	-0.398913	0.099453	-0.401532
ENSG00000144381	8859.5	-0.246881	0.0349647	-7.06087	1.65458e-12	1.12744e-10	HSPD1	3329	13.016	13.0208	13.1306	13.3161	13.2689	13.2276	13.0756	13.1106	13.1329	13.084	13.1849	13.2407	12.4657	12.5495	12.7355	13.1863	13.2179	13.2709	13.4661	13.454	13.4385	12.9979	13.0423	12.9936	13.2192	13.0536	12.8267	13.0999	13.145	13.1956	HSPD1	3329	-0.114628	0.97092	-0.219328	0.109404	-0.423611	1.53997e-05	-0.284783	0.0188244	-0.192171
ENSG00000111981	66.7637	0.666583	0.0944597	7.0568	1.70382e-12	1.15721e-10	ULBP1	80329	6.67289	6.52294	6.84568	6.429	6.30829	6.39836	6.29253	6.48582	6.1512	7.00752	7.13297	7.31302	6.83919	6.83744	6.76973	6.08741	5.77342	6.19905	6.7953	6.91	7.09241	6.16626	6.53323	6.22427	7.27967	7.71137	7.8992	7.70818	7.10993	7.30178	ULBP1	80329	0.66047	0.9999	1.04316	0.00191589	0.930506	0.388454	0.337729	0.916754	0.74099
ENSG00000176624	1970.88	0.250146	0.0354703	7.05227	1.76018e-12	1.19161e-10	MEX3C	51320	11.0603	11.0998	11.1046	10.9802	10.9268	10.9004	10.8797	10.7434	10.7904	10.841	10.7129	10.7482	11.028	11.0376	11.1507	10.6653	10.6864	10.7426	10.6002	10.594	10.4332	10.8396	10.5926	10.7689	11.2085	11.5385	11.6326	11.6836	11.3426	11.2049	MEX3C	51320	0.114446	0.98067	0.236698	0.418999	0.349791	0.000798233	0.230932	0.119615	0.369624
ENSG00000175556	107.838	0.609404	0.0864885	7.04607	1.8404e-12	1.24188e-10	LONRF3	79836	7.14093	7.61067	7.80393	7.11176	7.1606	7.28999	7.53767	7.38088	7.66224	7.41342	7.58756	7.50471	7.81209	7.77206	7.54199	7.17348	7.08197	7.22399	7.35261	7.09395	7.21371	7.24474	6.89918	7.11012	6.81379	7.2804	7.00176	7.32049	6.66462	6.86833	LONRF3	79836	0.532517	0.369178	1.69382	0.00796794	0.88527	0.000150724	0.392206	0.364783	0.670961
ENSG00000250305	996.936	-0.560892	0.0796644	-7.04069	1.91296e-12	1.28668e-10	TRMT9B	57604	9.28439	9.10651	9.21869	9.55632	9.58551	9.59537	9.85919	9.61839	9.81998	10.0411	9.79182	10.4542	8.30286	8.16622	8.23771	10.1432	10.2482	10.0762	10.7429	11.245	11.2487	8.82539	8.94305	8.83074	10.6787	10.5969	10.4804	10.2976	10.5372	10.8868	TRMT9B	57604	-0.406105	0.9999	-0.775095	9.23029e-08	-0.732393	0.415291	-1.01459	0.31684	-0.257017
ENSG00000165617	1737.13	-0.491625	0.069907	-7.03257	2.02769e-12	1.35511e-10	DACT1	51339	10.1039	10.2614	10.1922	10.5253	10.3557	10.3492	10.918	11.1562	11.1244	10.1507	9.82163	10.0752	11.0285	10.9734	11.0446	11.4181	11.2041	11.3112	10.8937	10.7243	10.6755	11.5142	11.3943	11.5738	10.694	10.299	9.70705	10.3883	11.0307	10.7544	DACT1	51339	-0.244338	0.818559	-0.482102	0.0639442	-0.488189	0.00495783	-0.777607	3.40168e-06	-0.699631
ENSG00000099954	572.43	0.457847	0.0650999	7.03299	2.02156e-12	1.35511e-10	CECR2	27443	8.02718	8.11722	8.21783	7.47701	7.55581	7.57486	8.75953	8.549	8.52429	9.57444	9.65097	9.80973	9.84006	9.99869	10.0285	8.4609	8.29449	8.26119	9.18815	9.04882	9.20647	9.47892	9.16301	9.64647	9.71863	10.1602	10.1426	9.88715	10.0095	9.8982	CECR2	27443	0.323045	0.995692	0.257402	0.638346	0.555162	0.201217	0.57753	0.297879	0.194859
ENSG00000182134	853.964	-0.28859	0.0411052	-7.02077	2.20646e-12	1.46987e-10	TDRKH	11022	9.68433	9.75549	9.76145	10.1099	10.1756	10.165	9.92029	9.73133	9.78135	9.50125	9.45733	9.46167	9.63105	9.61294	9.62381	10.2604	10.1563	10.1192	9.75578	9.5701	9.43617	9.89613	9.80068	9.60559	9.98479	9.81882	9.64001	9.76774	10.0747	10.0459	TDRKH	11022	-0.391429	7.03386e-05	-0.304001	0.303208	-0.154266	0.180276	-0.130487	0.519658	-0.311884
ENSG00000186369	748.788	0.433608	0.0617702	7.01969	2.22357e-12	1.47655e-10	NA	NA	9.18828	9.22084	9.63695	9.18831	9.11611	8.93264	9.49057	9.51943	9.57997	9.14458	8.96818	9.20355	9.53659	9.54246	9.63951	8.9961	9.01736	8.99563	8.57935	8.31637	8.4723	9.42208	9.1196	9.19821	10.435	10.919	10.6257	10.8808	10.7317	10.5141	NA	NA	0.584038	0.43183	0.134719	0.852684	0.353164	0.396049	0.738978	0.05054	0.255254
ENSG00000163527	4855.25	-0.261266	0.0372452	-7.01476	2.30343e-12	1.52472e-10	STT3B	201595	12.0902	12.0768	12.2495	12.3687	12.4771	12.364	12.3714	12.2761	12.387	12.0585	12.018	12.1465	11.7131	11.7497	11.8963	12.4648	12.4032	12.5852	12.4577	12.3331	12.2654	12.3449	12.2455	12.1478	12.4147	12.2117	12.2988	12.2397	12.3535	12.4381	STT3B	201595	-0.137418	0.802379	-0.0495284	0.905957	-0.462641	4.89187e-08	-0.283593	0.00722212	-0.157831
ENSG00000134769	3041.72	0.395547	0.0563968	7.01365	2.32187e-12	1.52724e-10	DTNA	1837	12.1565	12.1126	12.1895	11.8594	11.8945	11.8183	11.7066	11.6153	11.7177	11.6229	11.5318	11.645	11.9698	11.9044	11.6198	11.4676	11.3853	11.571	11.2791	11.1013	11.0774	11.143	11.0251	10.9511	11.3247	11.4789	11.3681	11.652	11.3033	11.2737	DTNA	1837	0.212606	0.928061	0.426577	0.00270549	0.817291	3.23565e-07	0.453586	0.0331305	0.205459
ENSG00000047346	1101.44	0.277476	0.0395601	7.01403	2.31547e-12	1.52724e-10	ATOSA	56204	10.3508	10.2538	10.3952	10.1551	10.1399	10.1258	10.0583	9.94678	9.98316	10.2231	10.3388	10.4155	10.2624	10.2624	10.1452	9.9366	9.6384	9.91356	9.99376	10.1003	10.0554	9.79144	9.67502	9.84486	10.357	10.4982	10.683	10.5095	10.256	10.3839	ATOSA	56204	0.172124	0.726106	0.252931	0.54782	0.481584	3.04449e-07	0.288937	0.0184718	0.237458
ENSG00000102096	368.52	-0.350182	0.049982	-7.00616	2.44941e-12	1.60606e-10	PIM2	11040	8.62001	8.53421	8.73777	9.00236	8.79154	8.98983	8.62637	8.6383	8.66166	8.61703	8.59269	8.52273	8.52335	8.35506	8.54666	8.83041	9.09386	8.76937	8.89147	8.75792	8.81646	8.91937	8.9583	8.85814	8.82718	8.3938	8.41614	8.65727	8.86105	8.63172	PIM2	11040	-0.294359	0.669153	-0.506606	0.176896	-0.495882	0.00391365	-0.282553	0.322956	-0.32935
ENSG00000011021	4341.45	-0.360564	0.0514782	-7.00421	2.48375e-12	1.62347e-10	CLCN6	1185	11.9083	11.9016	11.9184	12.5832	12.5903	12.585	12.1201	12.1586	12.2244	11.7349	11.6647	11.6499	11.5984	11.5407	11.5267	12.7208	12.6474	12.7474	11.8628	11.8667	11.7692	11.7387	11.6597	11.6677	12.197	12.1159	11.8833	12.1596	12.5024	12.3073	CLCN6	1185	-0.537738	2.7388e-13	-0.391112	0.00845914	-0.132352	0.210378	-0.153826	0.225195	-0.288799
ENSG00000131069	1628.72	-0.674407	0.0962976	-7.00336	2.49889e-12	1.62826e-10	ACSS2	55902	10.1857	10.1771	10.3443	11.5772	11.4871	11.4857	10.7172	10.8495	10.8007	10.0901	10.1187	9.80752	9.91347	9.77257	9.67955	11.8764	11.9335	11.8533	10.2486	10.1347	9.91026	10.1583	10.2254	9.96639	10.683	10.3006	10.1479	10.4681	10.891	10.7322	ACSS2	55902	-1.11745	3.45454e-19	-0.594279	1.02066e-05	-0.344713	0.0326477	-0.100256	0.839197	-0.480127
ENSG00000109819	970.953	-0.347248	0.0495952	-7.00165	2.52972e-12	1.64321e-10	PPARGC1A	10891	9.09803	8.85639	9.03785	9.3116	9.35596	9.36666	10.1362	9.89361	9.9649	10.0605	9.84292	10.0898	8.52962	8.73572	8.84186	10.0381	10.2612	10.1739	10.5545	10.5764	10.5213	9.11351	8.9315	8.95192	10.7783	10.6952	10.4988	10.6563	10.8839	11.022	PPARGC1A	10891	-0.162941	0.9999	-0.476142	0.0981193	-0.328215	0.430574	-0.576281	0.145176	-0.290192
ENSG00000130487	15.5976	1.39569	0.199469	6.99704	2.61424e-12	1.69284e-10	KLHDC7B	113730	5.51287	5.51613	5.18295	4.83516	5.28683	5.2573	4.83516	4.83516	4.83516	6.2531	6.71113	6.22986	6.53811	6.77912	6.49694	5.27656	4.83516	5.18809	5.78792	5.92557	5.79579	6.09474	5.96008	6.19584	5.4804	6.02334	5.91356	5.9519	5.48399	5.35676	KLHDC7B	113730	-2.25364		1.57664		1.0992		1.39922		1.83467
ENSG00000100078	37.3943	-1.65252	0.236307	-6.99311	2.68864e-12	1.73027e-10	PLA2G3	50487	5.4234	5.72997	5.80299	7.05584	7.21857	6.95865	6.04093	5.85495	5.7221	6.86182	6.49278	6.31867	5.17521	5.18581	5.39236	7.14517	7.18257	6.84874	6.98281	6.69527	6.56096	5.29284	5.6404	5.35366	6.5027	5.91852	5.68846	6.18472	6.74888	6.58479	PLA2G3	50487	-2.41813	0.00641404	-1.67778	3.05679e-07	-1.06813	0.492774	-0.318377	0.91474	-1.44047
ENSG00000196972	2073.02	-0.334987	0.0479017	-6.99321	2.68664e-12	1.73027e-10	SMIM10L2B	644596	10.8317	10.9983	10.8233	11.2098	11.2045	11.2311	10.883	10.9677	10.9381	11.134	11.0536	10.8864	11.1222	11.0521	11.1353	11.2423	11.3408	11.3073	11.4978	11.2833	11.2985	11.3283	11.5123	11.518	10.6209	10.4381	9.94639	10.5461	10.6869	10.4376	SMIM10L2B	644596	-0.371873	0.628179	-0.279582	0.115765	-0.356879	0.186101	-0.344604	0.33365	-0.264078
ENSG00000054690	967.975	0.383874	0.0549633	6.98418	2.86522e-12	1.83824e-10	PLEKHH1	57475	9.75037	9.9142	9.82388	9.52051	9.46381	9.58152	10.1116	10.0895	10.0366	9.47776	9.66599	9.69962	10.4318	10.4869	10.2552	9.89636	9.88036	9.86918	8.77893	9.22821	9.42241	9.85155	9.70014	9.84291	10.2969	10.6944	10.7558	10.5297	10.4888	10.4044	PLEKHH1	57475	0.21337	0.958218	0.309299	0.429764	0.630222	0.000395542	0.487853	0.0338413	0.269984
ENSG00000186792	477.268	-0.429008	0.0614328	-6.98337	2.88177e-12	1.84319e-10	HYAL3	8372	8.69487	8.89138	8.74342	9.26118	9.25612	9.20119	8.91974	8.99972	8.79217	9.21579	9.21315	9.1204	8.5575	8.515	8.48512	9.12032	9.31935	9.22873	9.5628	9.20173	9.45994	8.87538	9.10255	8.91141	9.3777	8.90749	8.4645	9.04226	9.36323	9.06684	HYAL3	8372	-0.348806	0.58268	0.0683006	0.925217	-0.50843	0.014203	-0.255623	0.490361	-0.503
ENSG00000054392	390.681	0.379889	0.0544076	6.98227	2.90442e-12	1.85199e-10	HHAT	55733	8.5094	8.44256	8.30478	8.03179	8.21402	7.99857	8.39996	8.44755	8.42027	9.46188	9.19668	9.39252	8.42244	8.48442	8.86078	8.13832	8.26522	8.41537	9.09733	8.93852	8.89845	8.40341	8.11419	8.26619	9.15653	9.46409	9.60765	9.62609	9.21124	9.12603	HHAT	55733	0.178756	0.9999	0.0409823	0.946889	0.40111	0.636131	0.411805	0.773376	0.434887
ENSG00000127328	3051.6	-0.259746	0.0372145	-6.9797	2.95816e-12	1.88051e-10	RAB3IP	117177	10.7826	10.7976	10.9851	11.1462	11.1652	11.1246	11.235	10.9242	11.1936	11.0231	10.9223	11.0523	10.5645	10.6023	10.5163	11.2835	11.2804	11.4019	11.3361	11.295	11.2671	10.9163	10.6903	10.8045	12.7978	12.7646	12.5266	12.7334	12.8864	13.0582	RAB3IP	117177	-0.20042	0.609026	0.0145247	0.982891	-0.250021	0.0558495	-0.307903	0.0253385	-0.243235
ENSG00000088986	3683.09	-0.274084	0.0393028	-6.97365	3.08827e-12	1.95725e-10	DYNLL1	8655	11.843	11.9324	11.8601	12.2017	12.0981	12.129	11.8888	11.9943	12.0659	11.6828	11.569	11.5946	11.6601	11.5907	11.6707	12.175	12.2159	12.1732	11.9583	11.7627	11.7617	11.9114	12.3129	12.0211	11.7668	11.4463	11.3584	11.5391	11.6303	11.5967	DYNLL1	8655	-0.200493	0.502633	-0.1077	0.846775	-0.455185	4.94086e-06	-0.219056	0.148352	-0.224067
ENSG00000149269	4579.92	-0.35562	0.0511583	-6.95138	3.61737e-12	2.28563e-10	PAK1	5058	11.8938	11.9288	12.0439	12.3641	12.3468	12.3355	12.0994	12.1586	12.1919	11.5334	11.5666	11.4141	11.9462	11.9925	12.0165	12.3886	12.384	12.4078	12.0463	11.8339	11.7706	12.285	12.2701	12.269	12.6163	12.4235	11.7612	12.4726	12.8421	12.6325	PAK1	5058	-0.240649	0.171178	-0.0821397	0.699178	-0.289838	0.00541851	-0.390768	0.00021009	-0.451721
ENSG00000104691	296.996	0.338163	0.0487069	6.94281	3.84378e-12	2.42135e-10	UBXN8	7993	8.6836	8.74596	8.79326	8.34113	8.2683	8.21336	8.61859	8.55475	8.34408	8.40541	8.34503	8.53888	8.53586	8.53834	8.52983	8.13832	8.19707	8.21146	8.12125	8.02619	8.28616	8.3136	8.29432	8.29525	8.69725	8.7421	8.68889	8.82996	8.49879	8.46455	UBXN8	7993	0.39136	0.0553148	0.203494	0.794575	0.279858	0.050758	0.344233	0.0603607	0.224693
ENSG00000180440	554.448	-0.791114	0.114013	-6.9388	3.95455e-12	2.47617e-10	SERTM1	400120	7.15792	7.57352	7.41504	8.12229	8.28813	8.18284	7.65053	6.98261	7.18305	10.8613	10.6925	10.9913	7.11737	7.02782	7.64723	8.27121	8.18929	8.14233	11.1732	11.2009	11.2143	8.3136	8.34185	7.86094	8.22719	7.61335	8.14936	7.86496	7.99237	8.26846	SERTM1	400120	-1.17946	0.905362	-0.302424	0.253721	-1.17498	0.365754	-0.353904	0.935805	-0.350493
ENSG00000123983	8317.42	-0.363044	0.052318	-6.93917	3.94401e-12	2.47617e-10	ACSL3	2181	12.6349	12.7281	12.8927	13.3201	13.3853	13.2916	12.9667	12.8972	12.9645	12.7211	12.714	12.698	12.3942	12.3974	12.526	13.2789	13.1938	13.3317	13.1244	12.9368	12.7727	13.021	12.9007	12.8091	13.2993	13.2837	12.9335	13.4839	13.5421	13.4672	ACSL3	2181	-0.323496	0.0174941	-0.41656	0.000757703	-0.473103	2.51825e-06	-0.244141	0.0851622	-0.19041
ENSG00000062485	5671.03	-0.159894	0.0230532	-6.93589	4.03671e-12	2.52004e-10	CS	1431	12.3578	12.4224	12.4558	12.5318	12.5667	12.5341	12.5639	12.5169	12.5837	12.3426	12.3558	12.4005	12.2904	12.2987	12.3463	12.6014	12.5196	12.6241	12.6676	12.5779	12.5317	12.5343	12.5708	12.4885	12.5815	12.3264	12.3696	12.3921	12.5224	12.5246	CS	1431	-0.0229763	0.9999	-0.108471	0.459516	-0.218641	0.000479608	-0.230813	0.000673804	-0.185944
ENSG00000160767	3090.05	-0.221772	0.0320039	-6.92953	4.22249e-12	2.62815e-10	ENTREP3	10712	11.341	11.4288	11.3288	11.6676	11.614	11.6714	11.4573	11.568	11.5076	11.6476	11.6603	11.5537	11.5042	11.4545	11.6047	11.6419	11.8302	11.7607	11.8771	11.6388	11.7244	11.6485	11.7361	11.8108	11.7695	11.5786	11.3544	11.5682	11.7678	11.667	ENTREP3	10712	-0.232594	0.134713	-0.0271466	0.953002	-0.211777	0.0417435	-0.13274	0.444225	-0.238408
ENSG00000119401	1345.52	0.20254	0.029251	6.92423	4.38365e-12	2.72034e-10	TRIM32	22954	10.3876	10.3248	10.3952	10.2235	10.2393	10.2092	10.2854	10.3986	10.3776	10.8664	10.8545	10.8664	10.4768	10.5273	10.5672	10.1172	10.0833	10.2307	10.7524	10.5468	10.5116	10.2556	10.2565	10.2649	10.418	10.491	10.6101	10.6268	10.4667	10.5033	TRIM32	22954	0.228742	0.124699	0.441094	0.0608244	0.279718	0.00120768	0.262245	0.00706148	0.114724
ENSG00000108406	1075.34	0.275783	0.0398546	6.91974	4.52477e-12	2.79958e-10	DHX40	79665	10.3597	10.269	10.3754	9.86474	10.1181	9.98732	10.0468	9.90261	10.0012	9.99223	9.94985	10.0586	10.2435	10.2713	10.1231	9.83382	9.83907	9.99355	9.86726	9.84125	9.85503	9.93083	9.82993	9.81928	10.4008	10.6414	10.8111	10.6353	10.2342	10.4335	DHX40	79665	0.104195	0.9999	0.16037	0.638914	0.376606	0.0272914	0.154094	0.697384	0.348073
ENSG00000282164	477.664	-0.341133	0.0493539	-6.91197	4.77959e-12	2.9485e-10	PEG13	359809	9.0375	8.88147	8.84669	9.23328	9.15241	9.08472	9.26595	9.2984	9.34574	9.1578	8.84129	8.94615	8.69208	8.64658	8.73744	9.30404	9.6581	9.46478	9.61427	9.40764	9.412	9.06738	8.89231	9.16104	8.71738	8.51067	8.28752	8.47766	8.71688	8.6875	PEG13	359809	-0.186523	0.849261	-0.13384	0.847244	-0.395038	0.00416538	-0.539015	8.10085e-05	-0.325253
ENSG00000141750	83.0988	-0.790841	0.114498	-6.90701	4.94981e-12	3.0445e-10	STAC2	342667	7.05258	7.07991	6.97286	7.87369	7.71261	7.87366	6.76493	6.48582	6.45191	6.7731	6.6601	6.92794	7.02799	6.73044	6.61347	6.91095	7.37762	6.97925	7.54418	7.8502	7.61265	6.95902	7.42881	7.01168	6.47241	6.43395	6.32182	6.40048	6.55905	6.50856	STAC2	342667	-0.890917	0.629696	-0.421508	0.213213	-0.548904	0.44286	-1.30832	0.0297281	-0.250405
ENSG00000102024	6165.98	-0.37605	0.0546296	-6.88363	5.83447e-12	3.57808e-10	PLS3	5358	12.3248	12.354	12.4626	12.7761	12.8308	12.7937	12.6603	12.6162	12.6587	12.5682	12.4824	12.676	10.6442	10.8779	11.2481	12.9239	12.9469	12.9896	13.1572	13.0419	12.9597	11.6576	11.4158	11.3996	13.0675	12.8462	13.0451	12.8111	12.8551	13.1049	PLS3	5358	-0.306145	0.589956	-0.102194	0.537114	-0.560659	0.00151221	-0.482754	0.01692	-0.114438
ENSG00000148082	5430.57	0.366024	0.0532279	6.87654	6.13227e-12	3.74967e-10	SHC3	53358	13.1203	13.0563	13.0131	12.8255	12.9175	12.82	12.5765	12.6073	12.6616	12.2957	12.0916	12.0273	12.9188	12.7722	12.3882	12.3538	12.2653	12.4759	11.874	11.6708	11.5987	12.1471	11.9726	12.0404	11.8088	12.2125	12.1069	12.2286	11.9779	11.9304	SHC3	53358	0.255392	0.767651	0.378475	0.0976906	0.664971	3.05191e-05	0.428352	0.0380433	0.277182
ENSG00000082212	2296.16	-0.218628	0.0318001	-6.87506	6.19655e-12	3.7779e-10	ME2	4200	11.0263	11.1272	11.1843	11.3404	11.444	11.3691	11.0971	11.0449	11.0922	11.2896	11.3635	11.1798	10.9382	10.9163	10.9522	11.1951	11.1858	11.1881	11.6307	11.5032	11.3134	11.3316	11.2418	11.1281	11.1455	11.039	10.9792	11.0317	11.1663	11.2587	ME2	4200	-0.110315	0.872159	-0.00785041	0.986788	-0.304351	5.64668e-05	-0.216155	0.0223332	-0.181754
ENSG00000131089	5301.55	-0.271914	0.0395933	-6.86769	6.5252e-12	3.96668e-10	ARHGEF9	23229	12.323	12.3455	12.3834	12.8447	12.9138	12.8742	12.2794	12.2683	12.3908	11.9632	12.0081	11.8546	12.1704	12.1517	12.1653	12.6926	12.6379	12.678	12.2526	12.0555	12.0121	12.428	12.3701	12.2967	12.4295	12.3476	12.4521	12.3251	12.4763	12.514	ARHGEF9	23229	-0.354411	0.00384242	-0.346851	0.0127029	-0.202447	0.106484	-0.17127	0.329898	-0.103034
ENSG00000215712	1601.71	0.212986	0.031074	6.85414	7.17419e-12	4.34852e-10	TMEM242	729515	10.8631	10.7924	10.8895	10.6174	10.5283	10.5768	10.6693	10.5917	10.6926	10.6525	10.6659	10.5163	10.8218	10.7502	10.8675	10.6178	10.4095	10.4731	10.4418	10.3749	10.3898	10.7059	10.6167	10.5532	10.8432	11.0234	10.8714	11.1284	10.8107	10.7578	TMEM242	729515	0.156482	0.651161	0.276699	0.353014	0.198054	0.0412914	0.216815	0.0662967	0.210938
ENSG00000126001	1414.09	0.232329	0.0339295	6.84739	7.52119e-12	4.53249e-10	CEP250	11190	10.4909	10.6055	10.5298	10.4581	10.3865	10.521	10.4901	10.3352	10.355	10.6373	10.5686	10.6307	10.947	11.0653	10.9985	10.2202	10.1934	10.3128	10.3413	10.5271	10.3898	10.6301	10.5828	10.7346	10.1315	10.5223	10.5396	10.4818	10.231	10.2802	CEP250	11190	0.161524	0.719174	0.326814	0.084499	0.367867	3.66658e-05	0.197275	0.158175	0.308763
ENSG00000174238	6341.74	-0.189023	0.0276042	-6.8476	7.51e-12	4.53249e-10	PITPNA	5306	12.611	12.6662	12.6583	12.9014	12.8694	12.8232	12.6409	12.6653	12.7076	12.4243	12.2881	12.3106	12.494	12.4838	12.4868	12.7173	12.7748	12.855	12.6025	12.5332	12.4414	12.7764	12.7481	12.7788	12.7184	12.6364	12.3891	12.6482	12.7113	12.6875	PITPNA	5306	-0.107531	0.920102	-0.112925	0.423363	-0.278851	0.00118583	-0.188079	0.109938	-0.146644
ENSG00000129625	13219.7	-0.264095	0.0385757	-6.84615	7.58652e-12	4.55869e-10	REEP5	7905	13.5859	13.612	13.7225	13.9973	14.061	13.9514	13.845	13.7395	13.7854	13.6024	13.5126	13.7299	13.0404	13.0842	13.0901	14.0122	14.0005	14.0823	13.9378	13.8864	13.8282	13.444	13.4131	13.2078	13.7332	13.7198	13.2697	13.6931	13.7311	13.7365	REEP5	7905	-0.237611	0.559415	-0.143418	0.180994	-0.285504	0.0591937	-0.269729	0.14672	-0.160432
ENSG00000158987	615.664	0.447795	0.0655716	6.82909	8.5452e-12	5.12e-10	RAPGEF6	51735	9.3569	9.60138	9.52373	9.28855	9.34032	9.32843	9.81922	9.76627	9.57696	9.09736	9.09366	9.24338	9.85753	9.7184	9.53257	9.66202	9.58354	9.64287	8.46471	8.66662	8.59442	8.97875	9.20834	8.76193	9.16631	9.69917	9.69703	9.67627	9.24661	9.21707	RAPGEF6	51735	0.104924	0.9999	0.31273	0.520316	0.783994	3.1876e-05	0.642285	0.00539464	0.517833
ENSG00000139146	572.136	0.331748	0.0485997	6.82613	8.72373e-12	5.21199e-10	SINHCAF	58516	9.49501	9.3769	9.59085	9.39309	9.28256	9.13941	9.26595	9.19216	9.36678	9.57935	9.5987	9.56999	9.01779	9.25842	9.3422	9.31018	9.06881	9.12583	9.34345	9.36057	9.14909	8.76397	8.74605	8.68964	9.24452	9.58507	9.5993	9.48738	9.10848	9.17168	SINHCAF	58516	0.118779	0.9999	0.150999	0.815505	0.540305	0.0350306	0.31881	0.455727	0.412435
ENSG00000083799	2238.05	0.302289	0.0443498	6.81602	9.35968e-12	5.57597e-10	CYLD	1540	11.3632	11.4714	11.5976	11.3348	11.4002	11.2611	11.3551	11.2908	11.3048	11.1531	11.0002	11.0754	11.3325	11.3289	11.1458	11.1598	11.0067	11.1537	10.9642	10.856	10.7462	10.9505	10.5986	10.7944	10.8321	11.4087	11.244	11.3028	10.979	10.9408	CYLD	1540	0.217932	0.508097	0.408228	0.0860097	0.500918	3.72717e-06	0.224785	0.191985	0.409152
ENSG00000164111	3934.62	0.284447	0.0417778	6.80857	9.85711e-12	5.85558e-10	ANXA5	308	11.5691	11.4338	11.5406	11.1652	11.0803	11.0267	11.3316	11.3812	11.2893	11.736	11.6943	11.8046	11.359	11.51	11.91	11.1	11.1485	11.1902	11.5328	11.5209	11.5081	11.4051	11.3041	11.4227	13.0242	13.2535	13.224	13.3342	12.9119	12.9052	ANXA5	308	0.197238	0.994683	0.137687	0.577728	0.242178	0.431861	0.227617	0.640303	0.321647
ENSG00000072310	886.266	-0.459742	0.0675341	-6.80756	9.92697e-12	5.88032e-10	SREBF1	6720	9.36044	9.29727	9.26252	9.90314	9.87304	9.98382	9.84267	9.93586	9.83011	9.18709	9.35347	9.34451	9.27189	9.20959	9.19044	10.4585	10.6795	10.3887	9.50622	9.24312	9.50307	9.4877	9.68877	9.63523	10.6185	10.0415	10.6166	9.85779	10.57	10.5929	SREBF1	6720	-0.671264	0.000482	-0.518815	0.0450621	-0.412729	0.0390806	-0.13911	0.805478	-0.409811
ENSG00000165507	146.333	-0.43393	0.0638086	-6.80049	1.04266e-11	6.15878e-10	DEPP1	11067	6.87676	7.06171	6.93184	7.29879	7.31435	7.43457	7.27956	7.18125	7.19938	7.85467	7.77981	7.99802	7.00936	7.11351	7.21972	7.26809	7.72181	7.4744	8.32546	8.3788	8.27849	7.18635	7.45107	7.13695	8.29713	7.92123	7.84703	7.7736	8.12579	8.12701	DEPP1	11067	-0.393077	0.9999	-0.931563	0.0136185	-0.217846	0.820186	-0.553011	0.578515	-0.424738
ENSG00000153012	15884.9	-0.558021	0.0820682	-6.79948	1.04997e-11	6.18444e-10	LGI2	55203	13.6896	13.7844	13.8755	14.5068	14.5706	14.5247	14.0874	14.0215	14.1141	14.0735	14.1501	13.9025	12.4673	12.5794	12.7022	14.479	14.4126	14.5182	14.7059	14.4655	14.4705	13.3086	13.2456	13.3359	13.6304	13.67	12.3704	13.6785	13.9328	13.7374	LGI2	55203	-0.392025	0.847561	-0.422722	0.000235539	-0.712874	0.019759	-0.508868	0.233498	-0.416107
ENSG00000145860	2908.09	-0.254251	0.0374312	-6.7925	1.1021e-11	6.4732e-10	RNF145	153830	11.265	11.2426	11.3473	11.6897	11.7039	11.6665	11.303	11.2787	11.3885	11.192	11.2694	11.2954	11.2918	11.4098	11.4421	11.6749	11.6169	11.6897	11.6417	11.3621	11.3843	11.6095	11.5747	11.6348	11.7696	11.7422	11.617	11.8156	11.9253	11.7407	RNF145	153830	-0.338542	0.216874	-0.352382	0.0544088	-0.225147	0.238232	-0.22169	0.388046	-0.091306
ENSG00000128165	115.207	0.732298	0.107922	6.78545	1.15723e-11	6.77792e-10	ADM2	79924	6.69725	6.75278	6.6004	6.10179	6.42053	6.16082	5.98219	6.3741	6.39171	7.76121	8.26782	7.90899	8.1106	8.24967	8.04655	6.58051	6.10163	6.53857	7.24565	7.20897	7.18017	7.23038	7.42881	7.49612	7.62843	8.10501	7.84089	8.29332	7.65236	7.50431	ADM2	79924	-0.319917	0.9999	0.641858	0.266137	0.981135	0.26171	1.05652	0.34508	0.636729
ENSG00000168264	1891.03	0.147816	0.0218142	6.77616	1.23409e-11	7.20782e-10	IRF2BP2	359948	11.005	10.8606	11.0168	10.8579	10.835	10.711	11.0747	11.054	11.0922	11.1223	11.0919	11.0523	11.0455	11.01	11.0015	10.9061	10.9485	10.9077	10.9478	11.0494	10.9551	10.8734	10.8374	10.7994	10.6845	10.7855	10.8462	10.8558	10.6885	10.7475	IRF2BP2	359948	0.16182	0.559415	0.103127	0.750876	0.191182	0.0530938	0.105401	0.579662	0.122739
ENSG00000137142	241.926	0.470808	0.0695139	6.77286	1.2626e-11	7.35375e-10	IGFBPL1	347252	8.6836	8.51506	8.37216	7.87369	7.98961	7.88133	6.98548	7.19654	7.2155	8.8872	8.88313	8.77977	8.78399	8.74147	8.78353	6.55802	6.72314	6.72877	8.70241	8.47712	8.55064	8.53965	8.02205	8.4785	7.75898	8.06356	7.92071	8.15747	7.95029	7.75322	IGFBPL1	347252	0.774176	0.385667	0.926815	0.0140451	0.475369	0.252754	0.309137	0.697384	0.285182
ENSG00000108669	1895.17	0.298775	0.0441344	6.76966	1.29089e-11	7.49761e-10	CYTH1	9267	11.1051	11.2045	11.1645	10.8435	10.8395	10.9649	10.9858	11.0378	10.9999	10.8472	10.993	10.8035	11.4051	11.3807	11.1703	10.8398	10.9565	10.8104	10.5389	10.5587	10.5735	10.7441	10.7967	10.659	10.8269	10.9481	10.8948	10.9677	10.8389	10.7507	CYTH1	9267	0.146758	0.984879	0.335215	0.0379308	0.607693	1.65779e-05	0.335539	0.0969953	0.131737
ENSG00000137770	646.398	0.225332	0.0333097	6.76475	1.33539e-11	7.73449e-10	CTDSPL2	51496	9.4918	9.43216	9.49731	9.20483	9.22579	9.3201	9.34792	9.31198	9.3563	9.39934	9.32345	9.41884	9.84132	9.83151	9.66735	9.17862	9.10622	9.09437	9.2276	9.29413	9.29224	9.54765	9.44304	9.48052	9.49909	9.69371	9.81453	9.73324	9.51233	9.64195	CTDSPL2	51496	0.23643	0.814171	0.192264	0.719214	0.316661	0.0726108	0.118931	0.810434	0.205646
ENSG00000116161	2194.2	-0.285267	0.0421757	-6.76376	1.34455e-11	7.76601e-10	CACYBP	27101	10.9685	11.0131	11.1603	11.3553	11.2336	11.2712	10.9477	10.9922	11.0495	11.144	11.1875	11.1505	10.7903	10.8477	11.0058	11.2066	11.2344	11.1753	11.4978	11.53	11.3992	11.2963	11.4598	11.3079	11.0102	10.8566	10.5834	10.9951	11.0239	10.9091	CACYBP	27101	-0.208139	0.0465894	-0.313343	0.204109	-0.482359	4.51531e-15	-0.325525	4.74321e-06	-0.166945
ENSG00000178695	2068.07	-0.705229	0.104376	-6.7566	1.41264e-11	8.13675e-10	KCTD12	115207	10.4748	10.3411	10.427	10.9992	11.069	11.0035	10.4859	10.3016	10.3965	9.98854	9.66898	9.82947	11.0119	10.7573	10.5948	10.7112	10.4375	10.7237	10.9862	10.7336	10.6624	12.4367	12.2276	12.0947	11.3849	11.4414	11.4555	11.0936	11.5602	11.5415	KCTD12	115207	-0.239698	0.652651	-1.0006	4.47716e-06	-1.48772	1.55014e-40	-1.01009	3.64784e-16	-0.165969
ENSG00000138759	791.394	0.665641	0.0985269	6.75593	1.41923e-11	8.15219e-10	FRAS1	80144	10.2152	10.1444	10.2004	9.55632	9.56144	9.55812	9.58103	9.22486	9.30633	9.42414	9.39736	9.55689	10.2359	10.3964	10.317	8.9961	9.03902	9.24928	9.37891	9.31544	9.19841	9.11728	8.73278	9.17975	9.29606	10.5841	10.2374	10.4365	9.99835	9.72356	FRAS1	80144	0.309952	0.692971	0.600422	0.126833	1.39589	2.39973e-19	0.174978	0.714077	0.764036
ENSG00000196468	9.4233	2.21444	0.328413	6.74284	1.55324e-11	8.89743e-10	FGF16	8823	4.83516	5.178	5.18295	5.18381	5.15519	4.83516	4.83516	5.16369	5.31454	6.50757	6.06019	6.52617	5.96213	5.64871	6.05243	5.14789	5.41597	5.18809	5.31798	5.71228	5.67081	5.29284	5.36618	5.35366	5.32966	5.86522	6.077	6.17452	5.27793	5.15566	FGF16	8823	-0.654842		2.34027	0.0138736	2.22468		2.17925		3.08908
ENSG00000170011	460.622	-0.454552	0.0675024	-6.73387	1.65212e-11	9.43792e-10	MYRIP	25924	9.49501	9.49514	9.57515	9.9107	10.0467	10.0406	8.53015	8.37784	8.58565	8.93792	8.20288	8.85468	8.8125	8.64351	8.5699	8.82182	8.49037	8.75216	8.94932	9.31897	9.16158	9.45228	9.26459	9.18901	8.3016	7.99902	8.05209	8.18267	8.2997	8.41626	MYRIP	25924	-0.221293	0.9999	-0.439511	0.0703016	-0.699101	0.237255	-0.507407	0.620398	-0.318025
ENSG00000105855	225.053	1.47432	0.219262	6.72399	1.76812e-11	1.0073e-09	ITGB8	3696	9.70391	7.5093	7.86808	6.91526	7.0201	6.84861	7.17401	6.92786	7.2155	8.04641	7.76855	8.0594	8.51072	8.53171	8.152	6.78523	6.28339	6.50878	7.16369	7.31489	6.80989	6.86718	6.98016	6.87311	8.51071	9.13228	10.0053	9.27139	8.57382	9.02161	ITGB8	3696	0.957945	0.9999	1.8901	4.10813e-05	2.03338	0.118028	1.16629	0.639685	0.881909
ENSG00000108829	2179.27	-0.176316	0.0262344	-6.72077	1.80769e-11	1.02704e-09	LRRC59	55379	10.9144	10.9185	11.0063	11.1094	11.1101	11.067	10.8618	10.9602	10.9216	11.3823	11.2275	11.226	10.9764	10.9776	11.0238	11.0348	10.9901	11.0938	11.5241	11.4649	11.5162	11.3013	11.1693	11.2915	11.154	10.9515	11.0596	11.0192	11.1552	11.0513	LRRC59	55379	-0.122428	0.945519	-0.0513104	0.882617	-0.265863	0.0109331	-0.227033	0.0803775	-0.117777
ENSG00000011332	1856.75	-0.316021	0.0470356	-6.71876	1.83277e-11	1.03845e-09	DPF1	8193	10.9604	10.9424	10.8983	11.1841	11.0061	11.0769	10.774	10.9922	10.9311	10.7869	10.8227	10.8611	10.9962	10.8423	11.1012	11.0181	11.1485	10.8857	11.3033	11.0009	11.127	11.4028	11.4922	11.4846	10.2307	9.85346	9.62539	9.87221	10.1897	10.2413	DPF1	8193	-0.117912	0.9999	-0.265812	0.492601	-0.484816	0.168472	-0.335915	0.579662	-0.459333
ENSG00000123095	613.252	0.602302	0.0898266	6.70516	2.01186e-11	1.13684e-09	BHLHE41	79365	9.43935	9.63708	9.59708	9.34922	9.3245	9.3201	10.1226	10.1793	10.1153	9.86932	9.78358	9.84895	9.21875	9.19921	9.23457	10.0157	10.274	10.1544	9.12267	9.17865	9.0224	8.39718	8.41584	8.36265	7.671	8.70325	8.39411	8.84436	7.97674	7.71911	BHLHE41	79365	-0.00707954	0.9999	0.0574468	0.948836	0.943466	5.24717e-11	0.785184	1.58718e-07	1.04868
ENSG00000125249	3066.42	-0.249827	0.0372687	-6.7034	2.03626e-11	1.14751e-09	RAP2A	5911	11.4804	11.4565	11.5606	11.7429	11.7371	11.6654	11.5436	11.4595	11.5572	11.5252	11.3663	11.6375	11.3898	11.3839	11.4132	11.6803	11.6291	11.6979	11.9513	11.9597	11.975	11.847	11.619	11.6292	11.4561	11.4496	11.4048	11.4994	11.6475	11.5941	RAP2A	5911	-0.146876	0.976577	-0.28476	0.185649	-0.308939	0.0369637	-0.456729	0.00141098	-0.121674
ENSG00000173641	126.135	-0.649792	0.0970087	-6.69829	2.10875e-11	1.18516e-09	HSPB7	27129	7.03417	7.13305	7.16063	7.70727	7.84453	7.74496	7.23833	7.55491	7.18305	7.91892	7.25349	8.04431	6.46779	6.5858	6.64093	7.75656	7.90509	7.91193	8.25805	8.45799	8.38228	6.68307	6.70061	7.08273	7.21051	6.99798	6.61356	7.09933	7.31506	7.151	HSPB7	27129	-0.700477	0.98067	-0.540029	0.0192684	-0.470924	0.698925	-0.729994	0.632329	-0.468577
ENSG00000167191	246.23	0.71697	0.10714	6.69193	2.20253e-11	1.23454e-09	GPRC5B	51704	9.61216	8.88643	8.75464	8.53727	8.5346	8.8149	7.57086	7.25599	7.55412	8.35443	7.824	8.08175	9.49252	9.34384	8.86347	7.1594	7.02866	7.22399	7.77856	7.95476	7.69658	8.34633	8.29432	8.13718	6.93696	7.36559	7.73867	7.39703	6.78105	6.90796	GPRC5B	51704	0.4753	0.98067	0.2529	0.702037	1.14247	0.00716011	0.364353	0.746139	0.93661
ENSG00000108946	11091.3	-0.166605	0.0249027	-6.69026	2.22777e-11	1.24534e-09	PRKAR1A	5573	13.3539	13.3642	13.4819	13.7004	13.7014	13.5709	13.4612	13.4576	13.5211	13.0055	13.0593	13.0013	13.0643	12.9859	13.025	13.6111	13.6522	13.6774	13.2178	13.2301	13.0863	13.2641	13.2727	13.1597	13.7915	13.7461	13.745	13.7459	13.7697	13.8119	PRKAR1A	5573	-0.162608	0.151697	-0.0270335	0.914053	-0.205529	0.00275619	-0.160077	0.0669416	-0.049368
ENSG00000147955	1932.7	-0.258808	0.0387195	-6.68418	2.32229e-11	1.29471e-09	SIGMAR1	10280	10.8113	10.8275	10.7951	11.0203	11.0021	11.0267	10.5745	10.5665	10.7146	11.2918	11.2496	11.1444	10.6783	10.7943	10.8714	10.7042	10.8711	10.9244	11.6078	11.3587	11.3949	11.175	11.2733	11.3233	10.7516	10.5334	10.5816	10.599	10.719	10.6539	SIGMAR1	10280	-0.216219	0.347689	-0.204434	0.306791	-0.485784	5.56556e-08	-0.234606	0.0647809	-0.146184
ENSG00000120875	3812.82	0.541689	0.0810607	6.68252	2.34869e-11	1.30594e-09	DUSP4	1846	12.7864	12.8289	12.7932	12.4904	12.5844	12.5552	11.7541	11.6976	11.7494	12.2371	12.0787	12.1307	11.8763	11.688	11.4995	11.4813	11.5034	11.5171	11.2296	11.4344	11.1532	11.096	11.175	11.1598	11.3677	11.7679	12.5369	11.5928	10.9957	11.4487	DUSP4	1846	0.242189	0.0913586	0.381397	0.000603872	0.566947	2.77974e-12	0.886679	3.46366e-29	0.747501
ENSG00000171617	10508.2	-0.385114	0.0576422	-6.68112	2.37124e-11	1.31496e-09	ENC1	8507	12.694	12.7865	12.8784	13.167	13.1829	13.1942	12.5059	12.6288	12.6757	13.3504	13.0242	13.4647	13.076	13.1755	13.3501	12.6455	12.4576	12.6502	13.8099	13.8512	13.8313	13.896	13.7309	13.751	14.0109	13.4864	13.7662	13.4991	13.9166	14.0535	ENC1	8507	0.0230113	0.9999	-0.259115	0.0658402	-0.589057	0.0764881	-0.543636	0.197682	-0.411982
ENSG00000102384	36.1606	-1.19925	0.179563	-6.67871	2.41062e-11	1.33326e-09	CENPI	2491	6.39773	5.59479	5.52581	6.87213	6.91731	6.65376	6.14893	6.18251	6.32817	5.6928	5.60863	5.81649	5.8374	5.64871	5.78881	7.46229	7.19862	7.37048	5.99211	5.92557	5.85182	6.26519	5.99758	5.8563	6.41399	6.24273	6.30846	6.26301	6.84907	6.55328	CENPI	2491	-1.95033	0.000750275	-1.16419		-0.809528	0.307818	-0.646083		-0.694527
ENSG00000250091	470.887	-0.396598	0.0594155	-6.675	2.47231e-11	1.36376e-09	NA	NA	9.1763	8.99151	8.86233	9.69999	9.65033	9.39071	9.14165	8.87234	8.91177	8.56824	8.47424	8.25539	9.00213	8.91929	8.80044	9.2666	9.08971	9.30135	8.96342	8.73167	8.69547	9.42513	9.3009	9.18284	8.85997	8.88774	8.64302	8.85997	9.14413	9.06047	NA	NA	-0.271485	0.522743	-0.447071	0.182812	-0.434531	0.00186983	-0.421775	0.0224065	-0.254973
ENSG00000145416	526.393	0.549964	0.0824517	6.67014	2.55567e-11	1.40602e-09	MARCHF1	55016	9.79278	9.73092	9.99874	9.68537	9.66797	9.53434	9.41208	9.1662	9.20088	9.34266	9.54771	9.65852	9.55353	9.53257	9.49508	9.07409	9.01299	9.17391	9.04967	9.02743	8.97126	8.67431	8.20712	8.62724	7.78497	8.31349	8.61952	8.37432	7.85214	8.08458	MARCHF1	55016	0.195773	0.98067	0.423663	0.274908	1.13413	5.2102e-11	0.552781	0.0156459	0.639555
ENSG00000122958	1902.8	-0.165568	0.0248325	-6.66738	2.60404e-11	1.42886e-09	VPS26A	9559	10.7866	10.7831	10.8626	11.0191	10.9862	10.956	10.9948	10.8319	11.0199	10.704	10.7027	10.7493	10.7414	10.7186	10.7225	11.1581	11.1235	11.0824	10.924	10.8895	10.8589	10.9952	11.0024	10.8872	11.0953	11.0227	10.966	11.0872	11.1002	11.1116	VPS26A	9559	-0.173754	0.18029	-0.0452865	0.910716	-0.238418	0.00070517	-0.17917	0.0606757	-0.0813486
ENSG00000128626	667.109	-0.326288	0.0490473	-6.6525	2.8815e-11	1.57696e-09	MRPS12	6183	9.21585	9.28607	9.03785	9.51059	9.25278	9.40914	9.15779	9.34541	9.44471	9.7261	9.60806	9.67073	9.05727	9.07746	9.14711	9.64025	9.71294	9.52998	10.0716	9.84369	10.0375	9.34691	9.68649	9.64423	9.691	9.34705	9.26313	9.44221	9.53889	9.44441	MRPS12	6183	-0.326712	0.414223	-0.158369	0.831408	-0.514985	0.0013323	-0.339668	0.118129	-0.229809
ENSG00000165280	10376.3	-0.164096	0.0246938	-6.6452	3.02795e-11	1.65277e-09	VCP	7415	13.2109	13.1768	13.221	13.4183	13.4225	13.435	13.2922	13.4295	13.4489	13.1627	13.1134	13.107	13.034	13.0376	13.1586	13.4788	13.531	13.5742	13.3744	13.1894	13.1611	13.3014	13.3321	13.3024	13.6066	13.4589	13.4443	13.555	13.5974	13.5839	VCP	7415	-0.131608	0.502633	-0.084976	0.540147	-0.232311	0.000864673	-0.118944	0.29184	-0.113072
ENSG00000196593	53.3824	1.05792	0.159344	6.6392	3.15384e-11	1.71699e-09	NA	NA	7.40398	7.72774	7.27787	6.49037	6.6394	6.67279	7.1958	7.57807	7.11569	6.73579	6.80733	6.82032	6.26198	6.1908	5.72504	6.84063	6.81202	6.19905	6.07962	6.67163	6.20902	5.47977	5.51819	5.43281	6.44581	6.74238	6.52783	6.40048	6.08529	6.22855	NA	NA	1.04697	0.0213672	-0.39909	0.725713	2.00197	0.00110903	0.810369	0.137693	0.604731
ENSG00000124193	3006.57	0.196693	0.0296417	6.6357	3.22974e-11	1.75373e-09	SRSF6	6431	11.8549	11.7299	11.8013	11.5166	11.5597	11.5664	11.747	11.7264	11.7265	11.328	11.2908	11.3312	11.6252	11.5879	11.4965	11.613	11.5583	11.5587	11.1125	11.1266	11.1131	11.3316	11.3589	11.3128	11.7644	11.8232	12.0794	11.7259	11.7082	11.7799	SRSF6	6431	0.163891	0.994683	0.23615	0.222114	0.244363	0.305592	0.20271	0.604027	0.129198
ENSG00000108387	1399.57	-0.323696	0.0488199	-6.63041	3.34758e-11	1.813e-09	SEPTIN4	5414	10.5919	10.8606	10.7015	11.183	11.2063	11.2968	10.4162	10.4669	10.2439	10.6859	10.7201	10.5733	10.41	10.339	10.3847	10.7847	11.0001	10.679	10.8171	10.7751	10.8448	10.4624	10.7483	10.552	9.12053	8.89947	8.72014	9.0213	9.17723	9.04376	SEPTIN4	5414	-0.46122	0.0441229	-0.332997	0.175238	-0.220238	0.324185	-0.158403	0.702658	-0.257918
ENSG00000100425	1360.33	0.181409	0.0273973	6.62143	3.5575e-11	1.9217e-09	BRD1	23774	10.5353	10.5566	10.5118	10.4286	10.2922	10.3203	10.4493	10.5102	10.5605	10.5735	10.6403	10.5811	10.7347	10.7756	10.7196	10.3848	10.4839	10.3532	10.2808	10.2771	10.4554	10.4771	10.4916	10.6579	10.1714	10.3656	10.3775	10.3414	10.2814	10.2178	BRD1	23774	0.108567	0.9999	0.180552	0.567595	0.208971	0.255773	0.267362	0.208163	0.139839
ENSG00000164463	305.949	0.534055	0.0808296	6.60718	3.91716e-11	2.11051e-09	CREBRF	153222	7.92479	8.33003	8.34261	8.02241	7.88878	7.85821	8.23639	7.78064	8.04404	8.69179	8.69032	8.78428	8.61168	8.74433	8.46755	7.85367	7.53577	7.83695	8.06963	8.58679	8.44521	8.21063	7.97741	7.86094	8.73559	9.39336	9.78275	9.30445	8.76205	8.9496	CREBRF	153222	0.359022	0.97092	0.927935	0.0153926	0.709757	0.0396402	0.393367	0.532352	0.756288
ENSG00000111203	387.749	0.28858	0.0437206	6.60054	4.09658e-11	2.19804e-09	ITFG2	55846	8.9835	8.80486	8.84143	8.44955	8.57273	8.5787	8.65705	8.62744	8.83316	8.8055	8.8934	8.84607	9.12488	9.11993	8.97185	8.44976	8.49667	8.60011	8.39679	8.42553	8.51201	8.69979	8.82313	8.77432	8.98342	9.01858	9.11934	9.01162	8.93573	8.87813	ITFG2	55846	0.231147	0.829642	0.393309	0.418999	0.348431	0.0313884	0.462447	0.0121721	0.126517
ENSG00000134375	3179.93	-0.275223	0.0416979	-6.60039	4.1007e-11	2.19804e-09	TIMM17A	10440	11.385	11.4473	11.5178	11.7715	11.6768	11.6796	11.5967	11.7092	11.679	11.7387	11.6437	11.6652	11.2443	11.3103	11.4599	11.8377	11.953	11.9277	12.087	11.8762	11.8864	11.6042	11.8439	11.6765	11.7247	11.4714	11.1411	11.623	11.6255	11.5545	TIMM17A	10440	-0.242795	0.312919	-0.259075	0.319381	-0.37513	0.000838878	-0.27561	0.0526072	-0.216843
ENSG00000219438	4038.64	-0.277881	0.0421116	-6.59868	4.14829e-11	2.20768e-09	TAFA5	25817	12.2073	12.2845	12.0998	12.4508	12.4435	12.4169	12.1391	12.3321	12.3702	11.8484	11.8762	11.8002	11.4489	11.2899	11.4779	12.4233	12.5065	12.5718	12.3454	12.0311	12.1032	11.7362	11.8495	11.9635	11.4955	11.3321	11.112	11.3747	11.4459	11.3372	TAFA5	25817	-0.214849	0.872159	-0.29233	0.0837484	-0.449705	0.00745784	-0.330344	0.14135	-0.156149
ENSG00000067191	3423	-0.264673	0.0401086	-6.59891	4.1419e-11	2.20768e-09	CACNB1	782	11.9328	12.0024	11.8826	12.1966	12.1915	12.2363	11.8439	11.9402	11.9201	11.6247	11.5062	11.4285	11.7093	11.6213	11.5987	12.1097	12.137	12.2003	11.8968	11.6493	11.6571	11.8414	11.8843	11.9267	11.2348	11.085	10.649	11.0487	11.4096	11.1374	CACNB1	782	-0.245691	0.622296	-0.174264	0.264957	-0.241444	0.171928	-0.222242	0.357658	-0.334407
ENSG00000173065	1844.95	-0.171562	0.0259997	-6.5986	4.15045e-11	2.20768e-09	FAM222B	55731	11.1393	11.0805	10.9946	11.258	11.267	11.256	10.9415	10.846	10.9762	10.7395	10.7861	10.747	10.6713	10.6819	10.689	11.0087	10.8795	11.0158	11.0302	10.8954	10.8448	10.9238	10.8497	10.92	10.6925	10.5764	10.5489	10.5557	10.8268	10.7404	FAM222B	55731	-0.0442912	0.9999	-0.084687	0.831408	-0.22128	0.0861804	-0.175117	0.354092	-0.204495
ENSG00000095380	992.818	-0.286944	0.0434895	-6.598	4.16753e-11	2.21112e-09	NANS	54187	9.50142	9.50806	9.51058	9.84909	9.77182	9.75819	10.0235	10.1848	10.1601	10.2617	10.1425	10.0474	9.63684	9.59722	9.72735	10.5127	10.538	10.4414	10.4568	10.2497	10.2154	10.0262	10.1194	10.0999	10.0639	9.89535	9.73073	10.0705	10.0638	10.0001	NANS	54187	-0.384122	0.0400922	-0.173872	0.749839	-0.451739	0.000901695	-0.166859	0.558931	-0.147371
ENSG00000175161	7095.85	-0.348289	0.0527989	-6.59653	4.20886e-11	2.22738e-09	CADM2	253559	12.7021	12.7862	12.9676	13.2728	13.37	13.2594	12.6361	12.5235	12.6373	12.2352	12.0776	12.1669	13.0768	13.0641	12.9278	12.9839	12.5809	12.9296	12.7877	12.6467	12.5112	13.5862	13.2541	13.2137	12.339	12.3507	12.097	12.4314	12.5579	12.536	CADM2	253559	-0.239664	0.923629	-0.327059	0.409556	-0.335652	0.16185	-0.498286	0.0370489	-0.184568
ENSG00000117676	477.161	-0.273051	0.041414	-6.59322	4.30399e-11	2.27196e-09	RPS6KA1	6195	8.94633	8.9869	8.92822	9.00708	9.14162	9.11393	8.94479	9.09327	9.09549	9.2315	9.19253	9.1591	9.05076	8.98853	8.87946	9.21512	9.25792	9.21209	9.63494	9.45322	9.38387	9.23321	9.40464	9.3128	8.69387	8.34185	8.23262	8.44915	8.539	8.51033	RPS6KA1	6195	-0.192398	0.846259	-0.372103	0.278246	-0.377714	0.00440487	-0.328848	0.0461609	-0.283442
ENSG00000091483	2068.03	-0.243014	0.0369056	-6.58474	4.55676e-11	2.39932e-09	FH	2271	10.8866	10.9903	11.1551	11.2873	11.281	11.2311	11.0901	11.0469	11.1192	11.0041	10.9123	10.9287	10.5848	10.5633	10.6647	11.141	11.2631	11.2636	11.2829	11.1875	11.2242	11.0033	11.0413	10.872	11.1889	10.9751	10.8015	11.0849	10.9943	11.136	FH	2271	-0.136284	0.97092	0.0712563	0.845912	-0.377806	0.00233331	-0.291805	0.0624853	-0.156579
ENSG00000145451	1253.99	-0.600836	0.0913352	-6.57836	4.75668e-11	2.492e-09	GLRA3	8001	10.2688	10.1791	10.1631	10.8977	10.9578	10.9711	9.54879	9.51062	9.60379	9.23462	9.12883	9.06957	10.21	10.1993	9.80597	9.98536	10.0518	10.1147	9.98688	9.99212	9.82399	11.3676	10.9386	10.7514	10.5702	10.7542	10.9132	10.7017	10.5732	10.8441	GLRA3	8001	-0.524659	0.794292	-0.646922	0.0469916	-0.993721	0.00682941	-0.855772	0.0589846	0.124113
ENSG00000132002	2254.07	-0.272964	0.0414942	-6.57836	4.75653e-11	2.492e-09	DNAJB1	3337	11.0764	11.0642	11.0364	11.3645	11.208	11.457	10.8846	11.0089	11.0353	11.3568	11.1979	11.3511	10.8501	10.7881	10.9446	11.1959	11.1584	11.1934	11.6431	11.679	11.6571	11.154	11.3211	11.2908	11.0448	10.7208	11.108	10.8431	10.9373	11.01	DNAJB1	3337	-0.204435	0.666359	-0.335572	0.0245439	-0.40261	0.000677938	-0.364182	0.0064758	-0.107263
ENSG00000079435	319.496	-0.307196	0.0467708	-6.56811	5.0957e-11	2.66292e-09	LIPE	3991	8.33277	8.43578	8.28936	8.66249	8.59406	8.63816	8.23639	8.73251	8.53678	8.39424	8.5347	8.44481	8.31383	8.24154	8.12073	8.61836	8.81115	8.71712	8.76824	8.53909	8.85291	8.63787	8.60754	8.57149	8.70903	8.46586	8.40103	8.53387	8.72927	8.64031	LIPE	3991	-0.209876	0.868051	-0.665513	0.0631477	-0.442498	0.00309868	-0.313336	0.142821	-0.264154
ENSG00000177337	36.4985	0.945488	0.144092	6.56168	5.32048e-11	2.77344e-09	NA	NA	6.45811	6.03899	6.29211	6.05833	5.82947	6.03539	6.04093	6.21688	5.7221	6.61663	6.57934	6.82032	7.29512	6.86003	6.76973	5.93788	5.65119	5.92772	5.89579	6.27962	6.04657	6.16626	6.39025	6.27899	6.19595	6.72123	6.94339	6.71404	6.53212	6.30534	NA	NA	0.461908	0.9999	0.2394	0.823511	1.30324	0.119631	1.21595		0.817813
ENSG00000149295	1328.24	0.342316	0.0521853	6.55963	5.3943e-11	2.8049e-09	DRD2	1813	10.9335	10.9472	10.9171	10.5753	10.4721	10.558	10.0323	10.2479	10.4201	11.1791	11.074	10.9796	10.8205	10.779	10.6314	10.1671	10.1992	10.2572	10.8913	10.6962	10.6389	10.2624	10.2457	10.3635	8.99376	9.36723	9.09999	9.57121	8.9364	8.99578	DRD2	1813	0.0413076	0.9999	0.450517	0.00193864	0.475659	0.144588	0.342281	0.522148	0.422885
ENSG00000146070	166.711	-0.611862	0.0932989	-6.55808	5.45034e-11	2.82699e-09	PLA2G7	7941	7.23975	7.34166	7.34055	7.94506	8.03744	8.17665	7.99209	7.42008	7.59111	8.22782	8.10842	8.41006	6.96159	6.83744	6.88655	8.02976	8.2048	8.21987	8.87165	9.00571	8.78985	6.994	7.0415	7.1236	6.9157	6.91831	6.44739	6.92103	7.27864	6.97237	PLA2G7	7941	-0.596598	0.430641	-0.846832	0.262019	-0.248397	0.649976	-0.742281	0.0339072	-0.455119
ENSG00000182870	1825.14	-0.331135	0.0505265	-6.55368	5.61363e-11	2.90446e-09	GALNT9	50614	11.2124	11.3132	11.0546	11.5363	11.5019	11.4238	10.7244	10.8189	10.8288	10.5374	10.6372	10.5258	10.5415	10.4706	10.5399	10.9935	11.2695	11.2955	10.9383	10.711	10.8109	10.8085	10.7967	10.9411	10.6842	10.3997	9.89177	10.5354	10.6602	10.5314	GALNT9	50614	-0.405538	0.00983519	-0.104512	0.786017	-0.341237	0.0121853	-0.266394	0.143693	-0.339643
ENSG00000255112	1028.53	0.20626	0.0314781	6.5525	5.65832e-11	2.92034e-09	CHMP1B	57132	10.106	10.2442	10.1504	10.0172	10.0959	9.97678	9.97284	10.0557	10.0366	10.1881	10.2055	10.2251	10.0906	10.0846	10.1264	9.91259	9.85621	9.97642	10.1659	10.0269	10.0576	9.71634	9.77512	9.78512	10.2208	10.3236	10.3667	10.3603	10.0485	10.0689	CHMP1B	57132	0.121456	0.794292	0.161363	0.699374	0.36411	1.25385e-07	0.126406	0.322476	0.242779
ENSG00000155307	26.7406	0.981258	0.149946	6.54409	5.98585e-11	3.08175e-09	SAMSN1	64092	5.84062	5.59479	5.60554	5.80531	5.54506	5.67074	5.77961	5.48806	5.31454	6.55239	6.46246	6.7629	6.64268	6.6668	6.7198	5.5291	5.71469	5.53587	5.6639	5.97173	5.85182	6.13112	6.13471	6.04071	6.39071	6.67414	6.78248	6.89344	6.23177	6.23911	SAMSN1	64092	-0.209355		0.549463	0.755185	1.18192		1.74616		0.941229
ENSG00000152969	2676.97	-0.348227	0.0532818	-6.53558	6.33624e-11	3.25411e-09	JAKMIP1	152789	11.3446	11.5047	11.4652	11.7123	11.7619	11.7275	11.1369	11.1036	11.1926	11.736	11.8197	11.755	10.9872	10.9132	10.9845	11.2343	11.3752	11.3267	12.2329	12.1572	12.2592	11.2854	11.2434	11.397	10.9086	10.6979	10.0568	10.8176	11.0938	10.9849	JAKMIP1	152789	-0.167342	0.97092	-0.349316	0.032144	-0.353742	0.0331703	-0.454359	0.0064758	-0.451072
ENSG00000149798	742.067	-0.300641	0.046011	-6.53412	6.39858e-11	3.27805e-09	CDC42EP2	10435	9.44933	9.53038	9.51717	9.63756	9.65792	9.65613	9.65482	9.65348	9.73088	9.53452	9.37924	9.37171	9.41201	9.16119	9.2874	9.90044	9.84153	9.86387	9.94495	9.59934	9.59486	9.4701	9.66113	9.66648	9.92281	9.58778	9.37787	9.69073	9.99229	10.0077	CDC42EP2	10435	-0.196495	0.788655	-0.44013	0.09249	-0.335786	0.0147464	-0.314591	0.0633732	-0.446506
ENSG00000150361	740.943	-0.587341	0.0898969	-6.5335	6.4251e-11	3.28357e-09	KLHL1	57626	9.30287	9.42877	9.50064	10.2194	10.1579	10.151	8.03977	8.0423	8.47972	8.47597	8.03553	8.82431	8.9657	8.74433	8.5633	8.66721	8.52158	8.72302	9.00492	9.31544	9.09802	9.63183	9.2768	9.15475	10.9275	10.4575	10.8953	10.4913	10.4809	11.0439	KLHL1	57626	-0.507274	0.216043	-0.408758	0.165469	-0.66441	0.00109483	-0.750558	0.000820534	-0.221511
ENSG00000169764	2323.41	-0.213486	0.0326794	-6.53275	6.45732e-11	3.29197e-09	UGP2	7360	10.9263	10.8517	11.0063	11.2629	11.1554	11.1975	11.036	11.0378	10.9954	11.1071	11.114	11.0597	10.9324	10.9999	11.2321	11.0858	11.1575	11.1318	11.4709	11.3424	11.3637	11.3573	11.3539	11.3345	11.5097	11.379	11.4	11.4036	11.4528	11.4869	UGP2	7360	-0.0998892	0.926972	-0.183276	0.419844	-0.292106	8.74163e-05	-0.30857	0.000143383	-0.09478
ENSG00000079739	957.602	-0.290314	0.0444931	-6.52492	6.80372e-11	3.4601e-09	PGM1	5236	9.65877	9.77164	9.66984	9.84383	9.80863	9.88954	9.82932	10.0064	9.93471	10.1257	10.0356	10.1007	9.39843	9.28616	9.54096	10.0692	10.3364	10.2813	10.5436	10.3163	10.5309	9.70134	9.93367	9.88146	10.1981	9.96802	9.97294	9.98203	10.0574	10.0469	PGM1	5236	-0.315739	0.147359	-0.178364	0.598538	-0.460247	0.000278953	-0.397824	0.00500742	-0.139229
ENSG00000182796	463.435	0.492382	0.0754745	6.52382	6.85404e-11	3.47721e-09	TMEM198B	440104	8.84392	9.27854	9.08746	8.71545	8.91092	8.74597	9.40759	9.38451	9.0528	8.85508	9.02531	8.88021	9.54739	9.53752	9.22419	8.94956	8.97303	9.02454	8.43115	8.36516	8.4723	8.56762	8.64108	8.6765	9.16265	9.15263	9.6195	9.10163	8.82328	9.02358	TMEM198B	440104	0.343704	0.368706	0.265007	0.53762	0.912533	2.79519e-10	0.570457	0.0029191	0.324583
ENSG00000184014	1745.41	0.281264	0.0431443	6.51916	7.07038e-11	3.57826e-09	DENND5A	23258	11.1228	10.8224	10.9295	10.7678	10.8058	10.7404	10.7298	10.7706	10.7023	10.9774	10.8387	10.8547	10.8924	10.8107	10.7732	10.6178	10.4456	10.603	10.7141	10.5881	10.6134	10.3483	10.255	10.3484	11.0111	11.1181	11.4403	11.1351	10.9553	11.0577	DENND5A	23258	0.18805	0.923354	0.32383	0.0828246	0.531323	0.000325247	0.259317	0.276994	0.230433
ENSG00000125746	2247.9	-0.27824	0.0427	-6.51615	7.2133e-11	3.64176e-09	EML2	24139	10.8817	11.0233	10.9008	11.4185	11.3904	11.3751	11.0287	11.1647	11.1346	11.2315	11.1292	11.0662	10.9517	11.0195	11.206	11.3265	11.5281	11.3788	11.2903	11.2842	11.4661	11.2796	11.3991	11.4266	11.0709	10.8872	10.7161	10.9072	10.8216	10.9163	EML2	24139	-0.305051	0.793072	-0.0436405	0.924745	-0.310944	0.243895	-0.211811	0.666988	-0.106406
ENSG00000168439	6288.84	-0.235478	0.0361441	-6.51496	7.27072e-11	3.66188e-09	STIP1	10963	12.5875	12.603	12.6049	12.773	12.7989	12.7912	12.5085	12.6389	12.6767	12.5477	12.5034	12.4636	12.2069	12.2276	12.3965	12.7165	12.7956	12.7963	12.8328	12.6771	12.6874	12.5062	12.7207	12.6678	12.806	12.6319	12.2937	12.6774	12.7812	12.7434	STIP1	10963	-0.155714	0.610247	-0.138252	0.439606	-0.355609	2.75753e-05	-0.232406	0.0329423	-0.23673
ENSG00000011638	633.747	0.319288	0.0490484	6.50965	7.53278e-11	3.78472e-09	LDAF1	57146	9.97871	10.0961	9.97023	9.81189	9.80636	9.67147	8.61078	8.58876	8.98175	10.0178	10.0471	10.0789	9.9935	9.78926	9.66735	8.4158	8.51539	8.41537	9.99832	9.64493	9.67825	9.43726	9.51175	9.61935	8.10962	8.29017	8.59322	8.45005	8.14801	8.12208	LDAF1	57146	0.344506	0.287891	0.685341	0.00420508	0.322634	0.0249875	0.280138	0.128881	0.381947
ENSG00000125166	4882.17	-0.174983	0.0269004	-6.50485	7.77687e-11	3.89797e-09	GOT2	2806	12.1118	12.1052	12.162	12.261	12.3527	12.2855	12.2257	12.2578	12.3077	12.3149	12.2612	12.3153	11.9321	11.9832	12.0353	12.3268	12.3806	12.4277	12.5672	12.4675	12.4808	12.2159	12.2636	12.1163	12.4036	12.2072	12.0551	12.3585	12.3575	12.3366	GOT2	2806	-0.110986	0.9999	-0.181552	0.0536092	-0.215389	0.18725	-0.21216	0.317378	-0.15821
ENSG00000117118	1180.21	-0.248923	0.038272	-6.50404	7.8192e-11	3.90979e-09	SDHB	6390	9.85162	10.008	9.96543	10.2456	10.0904	10.3424	10.1497	10.194	10.1801	10.5797	10.3556	10.4668	9.94648	9.95251	10.1342	10.2948	10.4045	10.3739	10.747	10.6826	10.7254	10.1528	10.4261	10.231	10.4324	10.0815	9.98352	10.1655	10.21	10.2261	SDHB	6390	-0.186396	0.767937	-0.370013	0.213213	-0.272083	0.0400931	-0.2576	0.109357	-0.228137
ENSG00000065054	1321.27	-0.267689	0.0411761	-6.50108	7.97439e-11	3.97785e-09	SLC9A3R2	9351	10.1454	10.2519	10.0965	10.3877	10.4076	10.3722	10.4139	10.558	10.4614	10.6076	10.5116	10.3134	10.2893	10.2413	10.4278	10.4966	10.7519	10.6941	10.7712	10.5735	10.6639	10.6844	10.8073	10.8498	10.2348	9.8979	10.009	9.93872	10.2022	10.0993	SLC9A3R2	9351	-0.172578	0.960109	-0.339067	0.238511	-0.475545	0.00126263	-0.197731	0.490361	-0.248166
ENSG00000272501	354.678	0.341085	0.0525122	6.49536	8.28375e-11	4.1223e-09	NA	NA	8.541	8.77839	8.72641	8.53727	8.43753	8.39981	8.92604	9.06142	8.90218	8.89117	8.93873	8.59661	9.48772	9.41733	9.15369	8.75114	8.82619	8.77506	8.36868	8.3788	8.3965	8.91937	9.06078	8.90767	7.74746	7.96982	7.76494	8.01941	7.71061	7.6326	NA	NA	0.209972	0.992508	1.01516	0.0500842	0.440403	0.072724	0.501861	0.09279	0.28963
ENSG00000082074	13.5966	2.66178	0.409832	6.49482	8.31301e-11	4.12702e-09	FYB1	2533	5.78516	5.51613	6.21895	5.18381	4.83516	5.2573	4.83516	4.83516	5.17491	6.38742	5.86344	5.94795	7.09997	7.35724	6.61347	4.83516	4.83516	4.83516	5.51486	5.64895	5.52058	5.15947	5.14289	5.25926	5.02285	5.25286	5.31691	5.18969	5.19715	5.09702	FYB1	2533	1.12223		3.14298		5.54902		1.638		1.15838
ENSG00000204178	1592.5	0.212774	0.0327894	6.48912	8.63366e-11	4.27602e-09	MACO1	55219	10.8419	10.8555	10.9196	10.7185	10.7643	10.5941	10.7026	10.7962	10.8796	10.7073	10.6733	10.6689	10.8942	10.8323	10.7852	10.7112	10.6877	10.7909	10.3086	10.4133	10.3862	10.48	10.6731	10.4429	10.5209	10.7323	10.6722	10.7738	10.6224	10.5259	MACO1	55219	0.0742919	0.9999	0.191698	0.38539	0.316201	7.6765e-05	0.324135	0.000379989	0.172512
ENSG00000273230	482.26	0.314857	0.0485465	6.48568	8.83303e-11	4.36439e-09	NA	NA	9.35336	9.45235	9.36109	9.10276	8.96912	9.21023	9.33379	9.35856	9.37373	8.87524	9.02531	9.05097	9.00213	9.04068	8.87946	9.28232	9.22431	9.27755	8.46471	8.63296	8.4723	8.48788	8.6599	8.70267	9.03438	9.3667	9.0421	9.29899	9.05358	8.91042	NA	NA	0.107845	0.9999	-0.14702	0.800612	0.406074	0.0169272	0.52211	0.00455254	0.26629
ENSG00000095321	2885.13	-0.231786	0.0357702	-6.47988	9.17942e-11	4.52483e-09	CRAT	1384	11.1547	11.2882	11.176	11.4096	11.3873	11.3522	11.4354	11.4678	11.5579	11.761	11.6929	11.7907	11.23	11.1645	11.3077	11.5955	11.6774	11.7002	12.0649	11.8034	12.0012	11.5041	11.5629	11.5375	11.5958	11.315	11.0576	11.4283	11.6011	11.4421	CRAT	1384	-0.168468	0.993974	-0.0686164	0.819995	-0.302984	0.178367	-0.216657	0.564019	-0.281027
ENSG00000174516	577.427	-0.259312	0.0400674	-6.47189	9.67856e-11	4.75961e-09	PELI3	246330	9.06808	8.96361	9.01005	9.22925	9.37143	9.3422	9.14165	9.26734	9.07431	9.54209	9.48809	9.41884	9.26816	9.27829	9.37636	9.25071	9.45106	9.35917	9.98688	9.70534	9.86014	9.44929	9.54239	9.54442	9.03037	8.75993	8.76042	8.8834	8.86316	8.95854	PELI3	246330	-0.205119	0.98067	-0.00957619	0.988725	-0.219311	0.439412	-0.399771	0.148117	-0.172062
ENSG00000215146	360.581	-0.355553	0.0550053	-6.46398	1.01981e-10	5.00333e-09	LOC441666	441666	8.20414	7.99282	8.13386	8.44955	8.47255	8.43123	8.30604	8.2769	8.36527	7.84642	7.7108	7.7215	8.65818	8.6527	8.5666	8.61338	8.62859	8.64434	7.96977	7.95476	8.06292	9.05167	8.85202	8.694	9.40683	9.39904	9.3151	9.26428	9.82261	9.83922	LOC441666	441666	-0.36198	0.920102	-1.10062	0.154327	-0.277982	0.518443	-0.300931	0.683179	-0.409109
ENSG00000158470	6407.38	-0.249323	0.0385874	-6.46124	1.03847e-10	5.08288e-09	B4GALT5	9334	12.5845	12.673	12.6464	12.9687	12.9628	12.8688	12.5153	12.4251	12.5615	12.1292	12.2104	12.1699	12.3345	12.2938	12.3605	12.7431	12.6226	12.7503	12.5541	12.3086	12.2803	12.6162	12.4537	12.6148	13.0864	12.9695	12.6133	13.0509	13.2939	13.1212	B4GALT5	9334	-0.202048	0.326642	0.00698773	0.987628	-0.232601	0.0247089	-0.220304	0.0786608	-0.283453
ENSG00000099785	1090.32	-0.270781	0.041925	-6.4587	1.05606e-10	5.15688e-09	MARCHF2	51257	10.0525	9.95718	9.91396	10.364	10.1931	10.278	10.0468	10.1737	10.1379	10.3347	10.151	10.0209	10.0586	9.99869	10.0249	10.3026	10.4886	10.3924	10.4944	10.1623	10.2034	10.2104	10.4151	10.3539	10.1771	9.88619	9.68072	9.90291	10.0939	10.0581	MARCHF2	51257	-0.283604	0.89197	-0.137478	0.752127	-0.313677	0.273738	-0.126777	0.874039	-0.302745
ENSG00000141526	1014.83	-0.565249	0.0875643	-6.45524	1.08046e-10	5.26369e-09	SLC16A3	9123	8.63178	8.78372	8.69177	9.38587	9.2694	9.30892	10.5544	10.0374	10.0212	10.2994	10.297	10.2787	9.71696	9.78511	10.2044	10.8011	11.6524	11.2207	10.7402	10.4979	10.8589	10.2401	10.1058	10.3757	8.88908	8.63722	8.70572	8.60661	8.91488	8.93782	SLC16A3	9123	-1.0713	0.107572	-0.819203	0.0067872	-0.339954	0.632978	-0.433237	0.673674	-0.304921
ENSG00000165443	3422.08	-0.36313	0.0563077	-6.44903	1.12569e-10	5.47129e-09	PHYHIPL	84457	11.9947	11.904	12.0307	12.1966	12.2632	12.1986	12.2732	12.1335	12.2941	11.1045	11.2174	11.2086	10.3887	10.3152	10.216	12.3519	12.3704	12.4434	11.895	11.904	11.8586	10.6768	10.714	10.5219	11.9613	11.6619	11.162	11.7685	11.9181	11.8249	PHYHIPL	84457	-0.150663	0.9999	-0.370506	0.00096832	-0.341919	0.179555	-0.72385	0.0006735	-0.35529
ENSG00000136099	307.61	-0.582288	0.0903104	-6.44763	1.13611e-10	5.50908e-09	PCDH8	5100	9.42256	9.00981	8.75464	9.36031	9.39584	9.36126	7.45098	7.54319	7.70772	8.48126	7.95865	8.51185	8.49798	8.37745	8.74036	8.04473	7.96121	7.79222	8.85661	8.57502	8.9474	9.09447	8.87633	9.20736	7.38903	6.91526	6.56609	6.99271	7.52612	7.55522	PCDH8	5100	-0.471132	0.920102	-0.221963	0.768775	-0.586803	0.190766	-0.537045	0.396882	-0.978811
ENSG00000006831	2071.41	-0.167251	0.0259959	-6.43376	1.24482e-10	6.02221e-09	ADIPOR2	79602	11.0118	10.9972	11.0455	11.1799	11.2386	11.1653	11.1477	11.1364	11.2246	10.7307	10.6778	10.6713	10.702	10.7128	10.6647	11.3196	11.3056	11.389	10.9132	10.8919	10.8576	10.9808	10.8333	10.844	11.2167	11.2175	11.0818	11.2835	11.3417	11.3366	ADIPOR2	79602	-0.165738	0.0131699	0.0320164	0.946889	-0.195009	0.000138147	-0.201348	0.00110834	-0.107647
ENSG00000110955	21681.5	-0.21532	0.0335228	-6.42308	1.33546e-10	6.44576e-09	ATP5F1B	506	14.1679	14.1287	14.1739	14.4603	14.404	14.3624	14.3548	14.4592	14.4681	14.489	14.4314	14.4756	13.8879	13.9427	14.1512	14.4786	14.6063	14.6311	14.7629	14.5562	14.5894	14.2524	14.4358	14.3138	14.6384	14.3759	14.2982	14.5063	14.5025	14.5407	ATP5F1B	506	-0.140624	0.874605	-0.11367	0.464946	-0.335346	0.00157285	-0.175412	0.297249	-0.169212
ENSG00000185305	766.653	0.284308	0.0442693	6.42225	1.34278e-10	6.46613e-09	ARL15	54622	9.8641	9.96422	10.0198	9.88279	9.7507	9.74789	9.30511	9.3487	9.52489	9.69928	9.9201	9.84248	9.68517	9.57653	9.48468	9.20525	9.10211	9.22459	9.8035	9.5848	9.64902	9.16186	9.2147	9.07035	9.87153	10.1114	10.2603	10.0734	9.71069	9.83326	ARL15	54622	0.245351	0.78382	-0.0901782	0.889289	0.477474	0.00291104	0.148389	0.709725	0.358862
ENSG00000188859	2080.1	-0.374129	0.0582976	-6.41758	1.38457e-10	6.65199e-09	FAM78B	149297	11.0721	11.1009	10.9934	11.3944	11.3767	11.2487	11.2018	11.1478	11.2237	10.9802	10.931	10.9539	10.4309	10.4801	10.64	11.1427	11.2613	11.2626	11.6055	11.2761	11.4475	11.1206	10.8538	11.112	10.9207	10.6557	10.1993	10.7071	11.135	11.0052	FAM78B	149297	-0.0276819	0.9999	-0.192242	0.524052	-0.527803	0.0168327	-0.507668	0.0467468	-0.50161
ENSG00000166024	506.566	0.270317	0.0421935	6.40659	1.4881e-10	7.13298e-09	R3HCC1L	27291	9.18031	9.29355	9.26644	9.0258	9.07509	9.00377	9.256	8.98706	9.19696	9.01623	9.00178	8.89281	9.0999	9.07746	9.15369	9.16511	8.87522	8.92069	8.53586	8.63862	8.62489	8.81611	8.78511	8.694	9.46833	9.5613	9.68185	9.7573	9.44931	9.54725	R3HCC1L	27291	0.175315	0.994956	0.376382	0.418999	0.391306	0.0692683	0.420247	0.112978	0.190559
ENSG00000078618	4403.98	-0.201076	0.0313932	-6.4051	1.50273e-10	7.18658e-09	NRDC	4898	11.9839	11.9823	12.081	12.3563	12.3877	12.3485	12.1214	12.107	12.1835	12.0111	12.0087	11.9382	11.9152	11.9988	12.0474	12.323	12.2097	12.3727	12.1406	12.1359	12.0766	12.3521	12.1651	12.1921	12.0389	12.0059	11.8201	12.0289	12.0994	12.0352	NRDC	4898	-0.162642	0.249629	-0.138232	0.494622	-0.250181	0.000349973	-0.135167	0.212608	-0.107522
ENSG00000134508	299.005	0.348129	0.0543891	6.40071	1.54654e-10	7.37913e-09	CABLES1	91768	8.60813	8.55935	8.41538	8.28756	8.09126	8.16421	8.06302	8.24873	8.26356	8.9645	8.67251	8.79328	8.51072	8.39219	8.4746	7.99935	8.05004	7.83695	8.57322	8.59848	8.35339	7.83794	7.92347	8.23652	8.71988	8.89068	8.82033	9.02972	8.77107	8.70153	CABLES1	91768	0.291832	0.835152	0.739218	0.0183965	0.544178	0.00619183	0.349399	0.215807	0.207856
ENSG00000130477	16320.4	-0.291348	0.0455584	-6.39505	1.60499e-10	7.64055e-09	UNC13A	23025	13.798	13.8952	13.8884	14.2745	14.3477	14.2984	13.9798	13.9619	14.0176	13.8172	13.7469	13.6826	13.5148	13.5251	13.695	14.1998	14.0553	14.2838	14.1669	13.9339	13.9267	13.9551	13.7095	13.9537	14.0665	14.1314	13.7296	14.1396	14.401	14.2992	UNC13A	23025	-0.191947	0.559415	-0.328442	0.159654	-0.29431	0.00900401	-0.266045	0.0455629	-0.25164
ENSG00000184867	3512.13	-0.180618	0.0282631	-6.3906	1.65235e-10	7.8481e-09	ARMCX2	9823	11.5993	11.7021	11.7471	11.8568	11.9014	11.8963	11.7247	11.6879	11.7705	11.7556	11.6655	11.684	11.6102	11.7009	11.7113	11.7394	11.8121	11.8132	12.0247	11.8485	11.8726	11.9599	11.9749	11.9924	11.9525	11.7309	11.7547	11.7762	11.8106	11.8339	ARMCX2	9823	-0.0563632	0.9999	-0.205775	0.119583	-0.30272	7.6765e-05	-0.219593	0.0228733	-0.118821
ENSG00000168913	745.745	-0.422726	0.0661517	-6.39024	1.65621e-10	7.84854e-09	ENHO	375704	9.83903	9.6805	9.58773	10.0312	9.92214	9.98557	9.60866	9.54553	9.67015	9.52437	9.37924	9.43899	9.62378	9.66814	9.53761	9.63292	9.90412	10.0296	9.94967	9.54025	10.0102	9.99372	10.1529	10.216	9.16814	8.70241	8.18196	8.85524	9.15677	8.97898	ENHO	375704	-0.267778	0.98067	-0.441939	0.330984	-0.54262	0.0593882	-0.42956	0.293401	-0.561013
ENSG00000057704	345.832	0.447618	0.0700574	6.38931	1.66638e-10	7.87886e-09	TMCC3	57458	9.23137	9.20506	9.39369	8.88416	9.01324	9.02786	7.9174	8.01739	8.21764	8.55327	8.61151	8.22233	9.27932	9.41374	9.1646	7.7006	7.9146	7.67369	8.22703	8.08585	7.66123	9.03578	8.78938	9.02966	8.0227	8.31789	8.81518	8.61144	8.02566	8.24037	TMCC3	57458	0.373195	0.9999	0.0414381	0.959124	0.372715	0.632758	0.555686	0.586369	0.585397
ENSG00000163703	2535.95	-0.208394	0.0326247	-6.38761	1.68494e-10	7.94859e-09	CRELD1	78987	11.2809	11.4355	11.3194	11.6185	11.648	11.6063	11.2957	11.3844	11.3309	11.0285	11.0525	11.0164	10.7948	10.8648	11.0208	11.4483	11.6312	11.5612	11.1437	11.1226	11.0763	11.1055	11.2603	11.2879	11.6898	11.4767	11.4564	11.5058	11.5841	11.547	CRELD1	78987	-0.209672	0.364781	-0.231654	0.284528	-0.329863	0.00111939	-0.0859463	0.766874	-0.134759
ENSG00000011347	4575.66	-0.237734	0.0372252	-6.38638	1.69858e-10	7.99483e-09	SYT7	9066	12.4823	12.5051	12.4233	12.7671	12.7816	12.7159	12.0252	12.143	12.1323	11.4767	11.557	11.3601	12.4685	12.3263	12.168	12.0755	12.148	12.2238	11.8777	11.7101	11.7118	12.5794	12.4839	12.5618	11.9501	11.8097	11.5616	11.6619	12.0316	12.014	SYT7	9066	-0.0438737	0.9999	-0.29311	0.147787	-0.215026	0.0528104	-0.309523	0.00634839	-0.325066
ENSG00000143153	13037.6	-0.268424	0.0420588	-6.38212	1.74658e-10	8.20222e-09	ATP1B1	481	13.2499	13.2961	13.345	13.7598	13.8154	13.7313	13.568	13.5209	13.5772	13.7715	13.6838	13.8182	13.2096	13.2114	13.3245	13.7977	13.8638	13.8412	13.9345	13.8958	13.9537	13.467	13.5447	13.4163	13.9575	13.7985	13.419	13.9987	13.9285	13.962	ATP1B1	481	-0.275274	0.887952	-0.126452	0.225689	-0.225445	0.467997	-0.171561	0.775302	-0.192867
ENSG00000160211	1058.22	-0.268078	0.0420173	-6.38019	1.76869e-10	8.28742e-09	G6PD	2539	10.1495	10.2031	10.0244	10.4684	10.5089	10.458	10.0177	10.2845	10.1997	9.93016	9.9523	9.74422	9.98217	9.88813	9.98249	10.351	10.5486	10.5126	10.1163	9.80156	9.987	10.2349	10.3182	10.3207	9.97996	9.66699	9.68524	9.86753	9.98265	9.83139	G6PD	2539	-0.305408	0.100787	-0.0996467	0.831408	-0.355238	0.00304029	-0.103348	0.764747	-0.205886
ENSG00000114948	4648.98	-0.248104	0.0389083	-6.37662	1.81034e-10	8.46354e-09	ADAM23	8745	12.0088	12.0412	12.0888	12.3609	12.3831	12.3234	12.1021	12.0234	12.1189	11.8145	11.7439	11.7441	11.8721	11.8408	11.8546	12.2351	12.1534	12.3425	12.2213	12.168	12.1027	12.1536	11.9533	12.0699	12.6293	12.3855	12.7593	12.3492	12.6228	12.7435	ADAM23	8745	-0.160891	0.966533	-0.139525	0.592202	-0.2049	0.281381	-0.404059	0.0158949	-0.163523
ENSG00000129757	2014.45	-0.384111	0.0602794	-6.37218	1.86363e-10	8.67378e-09	CDKN1C	1028	11.1393	11.1093	10.9454	11.5207	11.3181	11.3697	11.4043	11.653	11.7326	10.687	10.6807	10.5298	10.125	9.97579	10.1364	11.8883	12.1934	12.1258	11.2903	10.9429	11.1142	10.5076	10.5791	10.7832	10.0416	9.85271	10.1005	9.74605	9.86414	9.90212	CDKN1C	1028	-0.474049	0.826278	-0.562405	0.0637357	-0.568388	0.169177	-0.504998	0.375486	-0.038754
ENSG00000125846	420.313	0.272629	0.0427836	6.37227	1.86245e-10	8.67378e-09	ZNF133	7692	9.11487	9.06774	9.02402	8.88928	8.69621	8.8501	9.03498	9.07743	8.98629	8.78432	9.05304	9.04346	9.25879	9.23421	9.14711	8.70979	8.95491	8.65055	8.71915	8.71568	8.75725	8.89754	9.18909	8.86587	8.50685	8.66675	8.82752	8.66271	8.4833	8.44209	ZNF133	7692	0.29263	0.377067	0.0391331	0.969469	0.249677	0.107731	0.260493	0.227744	0.276284
ENSG00000132970	4513.03	-0.252237	0.0395981	-6.36992	1.89122e-10	8.78259e-09	WASF3	10810	12.3744	12.2901	12.3437	12.6806	12.7732	12.6801	11.9625	11.8605	12.0771	11.8197	11.7446	11.7533	11.9135	12.0065	11.9467	12.1128	11.9547	12.1274	12.0263	12.0268	11.9995	12.3676	12.1395	12.2668	12.1296	12.0809	11.7765	12.1722	12.3208	12.2637	WASF3	10810	-0.0942713	0.9999	-0.192615	0.515814	-0.305485	0.0473228	-0.249793	0.232298	-0.224976
ENSG00000221963	309.638	0.473361	0.0743279	6.36855	1.90822e-10	8.84182e-09	APOL6	80830	6.62267	6.68084	6.65349	6.33035	6.47278	6.27277	6.95989	6.61205	6.84831	8.66884	8.81451	8.79328	8.08943	8.16192	8.60886	6.4879	6.60229	6.62374	8.51039	8.19038	8.31644	8.23183	7.89168	8.09805	9.61994	10.1177	10.0654	10.224	9.49163	9.58854	APOL6	80830	0.43086	0.9999	0.940978	0.0448685	0.277801	0.890254	0.482312	0.894625	0.60323
ENSG00000173020	2948.13	-0.178606	0.0280662	-6.36374	1.96896e-10	9.10307e-09	GRK2	156	11.4852	11.5286	11.3999	11.6831	11.6127	11.6384	11.3574	11.5351	11.5716	11.4475	11.3872	11.3025	11.6976	11.6244	11.6095	11.6068	11.6419	11.6261	11.5162	11.4617	11.4526	11.8391	11.9575	11.988	11.506	11.2791	11.2159	11.378	11.4717	11.4399	GRK2	156	-0.130037	0.923354	-0.105884	0.700651	-0.286931	0.00777866	-0.100287	0.707088	-0.18731
ENSG00000102935	867.28	-0.259359	0.0408082	-6.35557	2.07658e-10	9.57936e-09	ZNF423	23090	10.1596	9.943	9.80785	10.2295	10.2824	10.2535	9.31952	9.36835	9.44801	9.8813	9.80815	9.78299	9.98331	9.94136	9.84033	9.55489	9.53261	9.62414	10.0365	10.0901	9.92983	10.3306	10.4124	10.3594	9.37507	9.25313	9.32599	9.40299	9.45025	9.50474	ZNF423	23090	-0.202309	0.9999	-0.621606	9.89774e-07	-0.464932	0.342358	-0.208994	0.874039	-0.129223
ENSG00000120457	52.5684	0.693117	0.109064	6.35512	2.0826e-10	9.58595e-09	KCNJ5	3762	7.25553	7.24939	7.52635	7.0172	6.95248	6.97364	5.98219	6.03242	6.11197	7.24513	7.18596	7.31302	6.95183	6.95707	6.49694	6.15452	5.92851	5.68929	6.52006	6.96796	6.71623	6.46654	6.39025	6.40503	5.7219	6.19904	6.14959	6.14857	5.96784	5.80658	KCNJ5	3762	0.248527	0.9999	0.552477	0.393632	0.731991	0.25601	0.789367	0.315254	0.855048
ENSG00000108840	5343.12	-0.230387	0.0362973	-6.34722	2.19239e-10	1.00691e-08	HDAC5	10014	12.4367	12.5385	12.4745	12.9055	12.8737	12.9536	12.3453	12.4556	12.4771	12.3171	12.2823	12.1107	12.3401	12.2892	12.2685	12.6557	12.7677	12.7931	12.5398	12.3439	12.4294	12.3473	12.4627	12.4891	11.9066	11.7886	11.7517	11.8217	11.8325	11.8392	HDAC5	10014	-0.31057	0.154776	-0.280014	0.0137484	-0.133117	0.491437	-0.204175	0.342402	-0.0768884
ENSG00000171729	96.2129	0.594483	0.0939749	6.32598	2.51637e-10	1.15149e-08	TMEM51	55092	7.51208	7.39986	7.59161	7.28282	7.1154	7.04607	6.49703	6.51216	6.71415	8.032	7.81308	7.95825	7.78586	7.38765	7.47905	6.78523	6.65206	6.7537	7.54418	7.492	7.38461	7.21587	7.01119	6.85675	6.34267	6.80044	6.91929	6.96398	6.35616	6.46209	TMEM51	55092	-0.264409	0.9999	0.516313	0.429764	0.773624	0.00135415	0.611594	0.0310439	0.916994
ENSG00000143409	494.118	0.424155	0.0670509	6.32586	2.51824e-10	1.15149e-08	MINDY1	55793	9.31019	9.31576	9.33147	8.83719	9.00929	8.89945	9.2257	9.18109	9.18516	8.51257	8.47424	8.38045	9.38987	9.49574	9.3726	9.10272	8.95946	9.03878	8.22703	8.19811	8.06292	8.62728	8.33012	8.72412	9.5311	9.58325	9.83143	9.6778	9.49616	9.48254	MINDY1	55793	0.181905	0.847561	0.643154	0.0650983	0.955722	5.14342e-19	0.347764	0.0785232	0.207196
ENSG00000278600	209.516	0.426124	0.0674818	6.31466	2.70765e-10	1.23539e-08	NA	NA	7.99081	7.88673	8.02603	7.51816	7.68264	7.54598	8.43586	8.40359	8.48617	8.17645	8.56076	8.49539	8.3779	8.34751	8.24186	8.21295	8.30171	7.99299	7.58197	8.36516	8.21559	7.79076	8.1004	8.00229	7.29124	7.63137	7.65207	7.77069	7.4188	7.28157	NA	NA	0.322823	0.895745	-0.0150156	0.991567	0.434051	0.147641	0.389546	0.355236	0.483484
ENSG00000182916	2168.43	0.39039	0.0618948	6.30731	2.83931e-10	1.29263e-08	TCEAL7	56849	11.6713	11.7408	11.836	11.6587	11.5996	11.6091	11.1233	11.0859	11.1609	11.4142	11.3999	11.297	11.453	11.4614	11.4123	10.9529	11.0594	11.1307	10.9371	10.9268	10.7803	10.6314	10.8041	10.5816	10.0772	10.4508	10.145	10.5561	9.9288	9.87483	TCEAL7	56849	0.0823176	0.995692	0.321002	0.210671	0.790999	4.76902e-27	0.498801	1.15137e-09	0.451514
ENSG00000228594	2013.15	-0.31159	0.0494718	-6.29833	3.00876e-10	1.36679e-08	FNDC10	643988	10.9048	10.9124	10.747	11.182	11.1275	11.0113	11.0185	11.1961	11.3066	11.0087	10.8147	10.9226	10.6839	10.5106	10.6578	11.223	11.6383	11.562	11.2266	10.9722	11.1615	10.8213	11.0999	11.1653	11.0691	10.7044	10.4549	10.7531	10.9485	10.9	FNDC10	643988	-0.306901	0.367035	-0.268661	0.453168	-0.427465	0.00577412	-0.213172	0.433774	-0.344015
ENSG00000125505	4438.9	-0.255077	0.0405402	-6.29194	3.13532e-10	1.42119e-08	MBOAT7	79143	12.0875	12.1821	12.014	12.4461	12.461	12.4592	11.9471	12.0731	12.0519	12.0025	11.9523	11.9051	12.0852	11.9418	12.0562	12.3471	12.4703	12.4876	12.1135	11.9307	12.0275	12.1444	12.2655	12.2617	12.124	11.908	11.6743	12.0255	12.1837	11.9845	MBOAT7	79143	-0.410627	0.00211745	-0.209619	0.102879	-0.195235	0.185251	-0.0744274	0.85468	-0.228819
ENSG00000196968	879.437	-0.256535	0.0407849	-6.28994	3.17596e-10	1.43649e-08	FUT11	170384	9.67019	9.81383	9.75031	9.92819	9.89887	9.932	10.1763	10.0455	10.0839	9.65343	9.53467	9.55952	9.24367	9.32487	9.35558	10.1603	10.3674	10.2532	9.73951	9.7267	9.70974	9.68364	9.807	9.84486	10.0587	10.0272	9.78958	9.84527	10.1658	10.1758	FUT11	170384	-0.164347	0.857664	-0.349319	0.268786	-0.507237	7.22326e-06	-0.152589	0.553216	-0.259537
ENSG00000103316	40.044	0.76312	0.12138	6.28704	3.23578e-10	1.46037e-08	CRYM	1428	6.93805	6.57789	6.62724	6.01289	6.33742	6.48974	6.24675	6.34438	6.295	7.23226	7.09643	7.41223	6.42348	6.3554	6.48154	6.01552	6.34833	6.41462	6.77266	6.49191	6.38253	5.9769	6.13471	5.93449	5.99867	6.0936	6.20273	6.29097	5.88542	5.86223	CRYM	1428	0.0806011	0.9999	1.2391	0.186094	0.909733	0.0681664	1.1363		0.704288
ENSG00000146278	508.108	0.563095	0.0896009	6.28448	3.28944e-10	1.48139e-08	PNRC1	10957	9.12321	9.10651	9.16091	8.63831	8.60986	8.6866	8.99958	9.10113	9.18516	9.05207	8.9036	8.82869	8.9749	8.78665	8.88475	8.92971	8.95491	8.936	8.39679	8.39231	8.4923	8.07628	8.04386	7.9222	9.87748	9.87918	10.809	9.78166	9.57784	9.80194	PNRC1	10957	0.183307	0.960424	0.91519	0.00719467	1.03165	6.04667e-13	0.579157	0.00100788	0.494063
ENSG00000014641	7344.57	-0.203719	0.0324457	-6.27875	3.4131e-10	1.53376e-08	MDH1	4190	12.5943	12.7367	12.7976	13.0176	13.0164	12.9806	12.8436	12.8865	12.8699	12.9208	12.9025	12.9545	12.3432	12.4347	12.4517	12.9911	13.0679	13.1183	13.1612	13.0949	13.069	12.6549	12.7941	12.5108	12.9971	12.8085	12.6545	12.8634	12.7934	12.8351	MDH1	4190	-0.189527	0.514901	-0.207299	0.41403	-0.2465	0.0278961	-0.185543	0.227744	-0.103515
ENSG00000141385	2210	-0.20006	0.0318746	-6.27648	3.46332e-10	1.55298e-08	AFG3L2	10939	10.9311	11.0052	10.96	11.1923	11.1393	11.0318	11.0859	11.1094	11.1488	11.1856	11.0627	11.1488	10.8376	10.8837	10.9553	11.2311	11.2428	11.3267	11.501	11.3706	11.4305	11.1374	10.969	11.1047	11.2451	11.1548	10.9083	11.2082	11.3174	11.2921	AFG3L2	10939	-0.150309	0.692971	-0.00297076	0.993586	-0.180835	0.0851015	-0.309187	0.00143713	-0.195461
ENSG00000179817	27.3736	1.09969	0.175218	6.27611	3.47154e-10	1.55333e-08	MRGPRX4	117196	5.78516	5.78966	5.91243	5.52749	5.61129	5.6181	6.33647	6.28248	6.11197	6.30878	6.78396	6.16633	6.51048	6.80277	6.61347	5.89651	5.92851	6.19905	5.99211	5.41436	5.85182	6.32648	5.96008	6.00659	5.91312	6.87812	6.35454	6.67155	6.27643	5.99125	MRGPRX4	117196	0.558132		-2.92502		1.11856		1.60949		1.21299
ENSG00000171988	1502.22	0.472363	0.0753339	6.27026	3.60436e-10	1.60931e-08	JMJD1C	221037	10.4369	10.389	10.5951	9.9257	10.224	10.1431	10.639	10.5379	10.5651	10.5387	10.5526	10.6307	11.3168	11.3098	10.9906	10.3993	10.1543	10.3475	10.1079	10.3716	10.2253	10.4917	10.1823	10.3052	10.5017	10.9243	11.5185	10.7623	10.703	10.8747	JMJD1C	221037	0.292345	0.476163	0.614179	0.0452026	0.915104	2.87451e-12	0.348223	0.0828927	0.409985
ENSG00000260196	331.714	-0.588628	0.0938942	-6.26906	3.63237e-10	1.61834e-08	NA	NA	8.14758	8.14251	8.19316	9.12463	9.07509	8.94716	8.50505	8.34499	8.427	8.38298	8.4879	8.19531	8.1803	8.24967	8.00304	8.96914	9.21673	9.19947	8.39679	8.496	8.41758	8.62196	9.21152	8.36813	8.50395	8.40933	8.20593	8.58796	8.81894	8.64885	NA	NA	-0.801154	0.00192427	-0.633535	0.100294	-0.739867	0.00106283	-0.0951583	0.929026	-0.296314
ENSG00000005022	3507.53	-0.214723	0.0342766	-6.26443	3.74181e-10	1.66355e-08	SLC25A5	292	11.4592	11.4672	11.539	11.7996	11.7191	11.6445	11.7373	11.8343	11.8817	11.8362	11.9176	11.9618	11.2724	11.352	11.6015	11.9187	12.0455	11.9721	12.1636	12.0744	12.0645	11.6537	11.8352	11.7475	11.9969	11.7213	11.8043	11.7803	11.8226	11.9031	SLC25A5	292	-0.15743	0.827055	-0.0751998	0.866299	-0.33512	0.00280288	-0.199761	0.227744	-0.146738
ENSG00000206053	1474.66	-0.212953	0.0340075	-6.26195	3.8019e-10	1.68667e-08	JPT2	90861	10.8164	10.6829	10.7244	10.9873	10.9741	10.9461	10.4644	10.6328	10.5711	10.2215	10.1617	10.2643	10.0789	10.1387	10.2984	10.7945	10.8196	10.8935	10.5806	10.3146	10.2234	10.4475	10.4465	10.4248	10.6727	10.5168	10.6507	10.5763	10.6788	10.7308	JPT2	90861	-0.282526	0.69071	-0.306705	0.105106	-0.273581	0.209816	-0.173288	0.68297	-0.120502
ENSG00000163961	829.672	-0.312604	0.0499479	-6.25862	3.88411e-10	1.71948e-08	RNF168	165918	9.48211	9.41169	9.44643	10.0126	9.92214	9.87068	9.9789	9.88909	9.82505	9.73052	9.77529	9.66586	9.33566	9.19503	9.19044	10.284	10.2867	10.212	10.0476	9.97438	9.86014	9.56433	9.44575	9.5917	9.57849	9.7912	9.65102	9.83194	10.0454	9.96205	RNF168	165918	-0.380693	0.00276981	-0.251792	0.471538	-0.315451	0.00762543	-0.2564	0.0836776	-0.125234
ENSG00000111276	1300.04	0.240811	0.0384873	6.2569	3.92693e-10	1.73476e-08	CDKN1B	1027	10.5585	10.4268	10.3754	10.2712	10.0487	10.1478	10.507	10.5848	10.4792	10.0087	9.96207	9.83599	10.6804	10.6342	10.5323	10.5007	10.5104	10.4783	9.5473	9.51284	9.48333	10.3627	10.3271	10.3851	10.712	10.8575	10.7716	10.9445	10.6993	10.6435	CDKN1B	1027	0.0339332	0.9999	0.253108	0.379811	0.272255	0.11951	0.45062	0.0110668	0.177141
ENSG00000122694	414.207	0.63121	0.100954	6.25245	4.04072e-10	1.78125e-08	GLIPR2	152007	8.9226	8.40834	8.40826	8.16545	8.11371	8.33481	8.50505	8.43513	8.447	9.78468	9.91257	9.73262	8.86294	9.06835	9.32092	8.36329	8.50294	8.38585	9.31444	9.1433	9.3296	8.46425	8.28827	8.44783	8.25973	9.28475	8.78067	9.59851	8.3837	8.04474	GLIPR2	152007	0.0557807	0.9999	0.628299	0.210132	0.797215	0.000197468	0.589149	0.0196427	1.17281
ENSG00000125531	191.196	-0.624614	0.0999233	-6.25094	4.08e-10	1.79477e-08	FNDC11	79025	7.90535	7.94559	7.87849	8.67443	8.58344	8.65597	8.03977	8.2416	8.35118	7.6983	7.74573	7.2471	7.39009	6.99797	7.31985	9.07409	9.31225	9.26953	8.06084	7.88913	7.99879	7.18635	7.0415	7.34558	6.40473	6.21013	6.1099	6.17452	6.50457	6.31028	FNDC11	79025	-1.1456	2.02929e-05	-0.800748	0.148458	0.0762501	0.906756	-0.528866	0.211639	-0.525274
ENSG00000118689	2001.51	0.325928	0.0522035	6.24343	4.28088e-10	1.87917e-08	FOXO3	2309	11.2613	11.1956	11.2401	10.945	11.0869	10.8779	10.9508	10.9645	11.1141	11.2775	11.1432	11.196	10.9968	10.9182	10.8938	10.8857	10.8209	10.8512	11.0213	11.0334	10.7722	10.4203	10.0178	10.2866	10.9922	11.3677	11.2832	11.2963	11.1615	11.1217	FOXO3	2309	0.168927	0.69484	0.257551	0.327871	0.716784	4.18994e-16	0.265176	0.0329354	0.224897
ENSG00000086619	164.44	0.527731	0.0845698	6.24018	4.37058e-10	1.91452e-08	ERO1B	56605	7.62433	7.5984	7.79295	7.14777	7.56684	7.63998	7.55436	7.56654	7.54156	7.60317	7.66281	8.01362	7.75912	7.81133	7.60217	7.47356	7.27611	7.17138	7.33784	7.22462	7.21371	7.31434	7.29938	7.08273	8.22013	8.65467	8.92166	8.51338	7.95162	8.3879	ERO1B	56605	0.337512	0.995692	0.175562	0.820578	0.683533	0.107046	0.70222	0.190079	0.593804
ENSG00000006283	136.714	-0.640961	0.102735	-6.23895	4.40521e-10	1.92564e-08	CACNA1G	8913	8.06264	7.82528	7.59161	8.24801	8.40767	8.31246	7.0352	7.28476	7.29335	7.02274	6.46246	6.63947	8.07657	7.69004	7.39798	7.602	7.89551	7.79222	7.59434	7.68263	7.24644	7.93645	8.13462	8.14359	6.68103	6.60581	6.30846	6.56747	6.77468	6.73803	CACNA1G	8913	-0.753583	0.0844766	-0.560574	0.255302	-0.409382	0.213504	-1.1895	0.000154186	-0.414976
ENSG00000145882	1661.4	-0.215459	0.0345517	-6.23584	4.4936e-10	1.96017e-08	PCYOX1L	78991	10.3473	10.3661	10.4129	10.7055	10.6268	10.6767	10.6352	10.5945	10.6098	10.8267	10.8347	10.9609	10.127	10.1235	10.318	10.8206	10.9092	10.7556	10.9653	10.8279	10.8383	10.4786	10.5214	10.5121	11.2366	10.9952	10.9422	11.0827	11.2593	11.1761	PCYOX1L	78991	-0.22029	0.267239	-0.377028	0.0067872	-0.322965	0.000973969	-0.00436545	0.993838	-0.225407
ENSG00000150394	478.107	-0.522456	0.0838458	-6.23115	4.63012e-10	2.01551e-08	CDH8	1006	9.57619	9.2442	9.27035	9.81994	9.87737	9.88579	8.06302	8.35162	8.17018	8.66421	8.20288	8.45052	9.33922	9.15905	9.16894	8.45534	8.24286	8.51415	9.12267	9.26885	8.71825	10.2675	10.0747	9.81331	8.13368	8.25732	7.83265	7.94173	8.14684	8.33476	CDH8	1006	-0.244992	0.9999	-0.575447	0.00435247	-0.898824	0.301479	-0.690854	0.644314	-0.2285
ENSG00000124523	573.387	-0.195599	0.0314125	-6.22678	4.76112e-10	2.06821e-08	SIRT5	23408	9.00624	9.05016	9.0963	9.3455	9.38369	9.35855	9.21031	9.13212	9.08705	9.22837	9.28891	9.33533	9.09147	9.25842	9.12494	9.27605	9.41842	9.3131	9.36483	9.42408	9.40502	9.36925	9.33923	9.2104	9.54707	9.36828	9.32527	9.36836	9.50157	9.49439	SIRT5	23408	-0.210888	0.364186	-0.00101031	0.999193	-0.157684	0.15682	-0.126498	0.511732	-0.177487
ENSG00000108528	2557.12	-0.248617	0.0399363	-6.22532	4.80562e-10	2.0832e-08	SLC25A11	8402	10.9915	11.1241	10.991	11.2381	11.2801	11.2494	11.0547	11.3354	11.3112	11.4468	11.481	11.3127	11.1145	11.0783	11.2496	11.3211	11.5104	11.3685	11.7625	11.5132	11.5811	11.3981	11.5635	11.5131	11.645	11.2518	11.1388	11.3822	11.5673	11.3921	SLC25A11	8402	-0.159742	0.896309	-0.187498	0.561969	-0.348654	0.00620672	-0.213294	0.271126	-0.286762
ENSG00000109107	1425.56	-0.569973	0.0915944	-6.22279	4.88393e-10	2.11077e-08	ALDOC	230	10.4829	10.4818	10.3461	11.25	11.2801	11.2862	11.2401	10.5117	10.3776	9.94546	9.64795	9.43613	9.94648	9.82208	10.1463	10.9636	11.8668	11.4637	9.9307	9.92444	9.837	10.4683	10.7307	10.3304	10.3336	9.87437	9.53444	9.99097	10.208	10.1907	ALDOC	230	-0.730239	0.38593	-0.652539	0.00211499	-0.564585	0.224673	-0.221341	0.864056	-0.458493
ENSG00000131080	300.43	0.462505	0.0743265	6.22261	4.88947e-10	2.11077e-08	EDA2R	60401	7.64808	7.85634	7.71355	7.3759	7.55581	7.58435	7.63496	7.77068	7.52889	9.30457	9.44692	9.46728	8.70873	8.93441	9.04218	7.48473	7.3059	7.33927	9.19214	9.19791	9.13649	8.6536	8.30635	8.3952	8.10834	8.4708	9.0145	8.64085	7.99884	8.14169	EDA2R	60401	0.37207	0.793072	0.926727	0.0420512	0.513767	0.022544	0.252252	0.548429	0.75436
ENSG00000180573	575.401	0.34603	0.0556357	6.21958	4.98502e-10	2.14758e-08	H2AC6	8334	8.6836	8.92071	8.87781	8.5503	8.0837	8.50687	9.0865	9.39412	9.12463	9.01985	9.16315	8.84607	8.30286	8.54823	8.71084	8.96914	8.80103	8.99076	8.73021	8.60428	8.7295	8.33333	8.28827	8.23051	10.4405	10.5978	10.5606	10.623	10.265	10.2578	H2AC6	8334	0.325001	0.791477	0.677723	0.0635752	0.294178	0.328188	0.36645	0.299768	0.277918
ENSG00000179604	285.688	0.537968	0.0866165	6.21092	5.26767e-10	2.26466e-08	CDC42EP4	23580	9.66449	8.79961	8.95278	8.82119	8.77764	8.66038	8.43586	8.29767	8.49899	8.24038	8.59269	8.11823	8.85548	8.77268	8.68375	8.05954	8.29449	8.34037	8.09568	7.8403	7.46949	8.0285	8.05105	8.21842	7.79938	8.02357	8.17874	8.13744	7.6507	7.56995	CDC42EP4	23580	0.217043	0.9999	0.176563	0.852464	0.794985	0.0396272	0.623018	0.26328	0.552885
ENSG00000132932	23372.3	-0.305242	0.0491959	-6.20463	5.48256e-10	2.3522e-08	ATP8A2	51761	14.6362	14.6235	14.6867	14.9267	15.0244	14.9481	14.789	14.574	14.755	13.616	13.5267	13.435	13.494	13.487	13.4372	14.9299	14.8563	15.0747	14.2544	13.9775	13.8764	13.8557	13.573	13.7215	14.8828	14.9828	14.6115	14.9997	15.1513	15.153	ATP8A2	51761	-0.243074	0.982289	-0.129233	0.719214	-0.246245	0.51906	-0.520875	0.130983	-0.193773
ENSG00000171094	2568.63	-0.272223	0.0438853	-6.20306	5.53774e-10	2.37099e-08	ALK	238	11.9816	11.93	11.899	12.2048	12.2369	12.2462	11.1206	11.2242	11.3451	11.18	10.8308	11.2571	10.2994	10.0823	9.83762	11.5483	11.3962	11.5497	11.2593	11.3706	11.4141	10.247	10.1839	10.2473	11.4856	11.1673	11.1627	11.0587	11.4378	11.5717	ALK	238	-0.267376	0.597693	-0.19518	0.606714	-0.144665	0.551654	-0.255204	0.296728	-0.381214
ENSG00000172350	1606.38	-0.298054	0.0480696	-6.20046	5.62975e-10	2.40468e-08	ABCG4	64137	10.4201	10.5566	10.4717	10.7026	10.6984	10.7446	10.8569	11.0203	10.8833	10.6219	10.5861	10.5445	10.3496	10.2584	10.3508	11.0105	11.1396	11.064	11.1082	10.9452	10.9974	10.5205	10.4546	10.5508	10.8117	10.5049	9.99947	10.5167	10.8432	10.692	ABCG4	64137	-0.147788	0.793072	-0.37355	0.00789417	-0.193672	0.101921	-0.44952	4.1142e-06	-0.441123
ENSG00000155621	451.098	0.258676	0.0417206	6.20019	5.63949e-10	2.40468e-08	C9orf85	138241	9.31384	9.35204	9.22676	9.06706	8.96912	8.89571	9.03498	8.99551	9.00433	8.97574	8.92878	8.78428	9.02886	8.92182	8.80324	8.88092	8.99093	8.92069	8.7357	8.64427	8.6369	8.53399	8.4047	8.6181	9.14174	9.29754	9.25707	9.31726	9.10255	9.16338	C9orf85	138241	0.0941677	0.9999	0.449794	0.25302	0.46123	3.04659e-05	0.254881	0.141853	0.167443
ENSG00000188529	1513.51	0.200057	0.0322796	6.19761	5.7326e-10	2.4394e-08	SRSF10	10772	10.7099	10.6571	10.6826	10.3363	10.3479	10.3397	10.7947	10.6342	10.6403	10.4261	10.4119	10.5325	10.6485	10.7608	10.71	10.6042	10.5945	10.4342	10.1205	10.4001	10.4469	10.5694	10.4942	10.4621	10.8136	10.9485	11.0026	10.9453	10.779	10.8176	SRSF10	10772	0.153462	0.98067	0.331279	0.0976904	0.208667	0.282556	0.132416	0.740457	0.163037
ENSG00000162929	1156.22	-0.291466	0.0470829	-6.19048	5.99815e-10	2.5472e-08	SANBR	84542	10.2055	10.2365	10.2819	10.4426	10.6397	10.5918	10.7476	10.5494	10.6171	9.69702	9.59557	9.82947	10.0704	10.1645	10.0045	10.8545	10.7467	10.7951	9.98459	10.1287	10.1164	10.4698	10.2764	10.1417	9.79298	9.8006	9.36525	9.64144	10.0249	9.97564	SANBR	84542	-0.160793	0.9999	-0.201575	0.535533	-0.228353	0.383851	-0.391114	0.140334	-0.343488
ENSG00000148110	678.071	0.327357	0.0528997	6.18826	6.08337e-10	2.57814e-08	MFSD14B	84641	9.4918	9.55548	9.48728	9.33429	9.29559	9.2222	8.9936	9.17367	9.21642	9.86128	10.024	9.73029	9.77327	9.76133	9.76934	8.98845	9.08555	9.03405	9.60532	9.6561	9.47001	9.56433	9.29491	9.5396	9.43286	9.79669	10.1115	9.75476	9.25411	9.40776	MFSD14B	84641	0.117111	0.996427	0.248491	0.560168	0.323209	0.00791298	0.313195	0.0313926	0.562986
ENSG00000163898	41.503	1.00199	0.161984	6.18574	6.18104e-10	2.61422e-08	LIPH	200879	6.8124	7.07991	7.01262	5.96521	5.82947	6.00141	5.61077	5.29878	5.88848	6.97652	6.98031	6.92794	7.07344	7.06659	6.89767	5.45701	5.31045	5.53587	6.54782	6.24573	6.64106	7.02807	6.73912	6.87311	5.96396	6.36898	6.26039	6.25828	5.77853	5.7016	LIPH	200879	0.834241	0.992508	0.708711	0.31158	0.212161	0.843386	0.823899		1.19907
ENSG00000138741	300.432	-0.447951	0.0724455	-6.18328	6.27823e-10	2.64995e-08	TRPC3	7222	7.9151	8.25489	8.32003	8.39276	8.3012	8.35681	8.06302	8.03405	7.77325	8.56327	8.43246	8.84174	8.42917	8.25372	8.246	8.23264	8.02398	8.23654	9.18414	9.36739	9.412	8.928	8.4649	8.63179	8.33685	8.13281	7.96086	8.17505	8.46764	8.65055	TRPC3	7222	-0.253257	0.98067	-0.0797618	0.930709	-0.43445	0.0948904	-0.786472	0.000715026	-0.478723
ENSG00000123191	1006.11	0.248429	0.0401961	6.18043	6.39274e-10	2.69283e-08	ATP7B	540	9.95557	9.95483	9.89639	9.74015	9.72926	9.84579	10.1524	10.1303	10.188	10.2136	10.1143	9.98031	9.96731	10.033	10.1638	10.0006	9.86108	10.0693	9.91631	9.76074	9.58563	9.87401	9.62819	9.7912	10.2161	10.5606	10.412	10.5356	10.4048	10.2686	ATP7B	540	0.19232	0.849261	0.35208	0.223313	0.310515	0.0401438	0.36467	0.0307375	0.21155
ENSG00000187446	4713.5	-0.189255	0.0306269	-6.17938	6.43536e-10	2.70532e-08	CHP1	11261	12.0645	12.0681	12.1477	12.3792	12.4043	12.264	12.0549	12.1306	12.2622	11.9725	11.9614	11.903	11.8417	11.8747	11.9267	12.4399	12.37	12.4362	12.1952	12.0284	11.9855	12.041	12.1252	12.0357	12.4953	12.4832	12.3493	12.5639	12.6135	12.6194	CHP1	11261	-0.26158	0.16481	-0.183827	0.126127	-0.185973	0.170619	-0.129908	0.579987	-0.112528
ENSG00000204389	763.873	-0.249179	0.040372	-6.17207	6.73998e-10	2.82767e-08	HSPA1A	3303	9.88385	10.0593	9.858	10.2154	10.1126	10.2579	9.29542	9.41	9.5155	9.69928	9.54446	9.63876	9.63684	9.48382	9.48816	9.54451	9.78891	9.54334	9.8087	9.65332	9.79226	9.87624	10.0232	9.93375	9.33448	9.09452	9.1343	9.17554	9.29054	9.24767	HSPA1A	3303	-0.232312	0.992508	-0.265537	0.585551	-0.432694	0.142421	-0.134053	0.886323	-0.175687
ENSG00000162426	1367.92	-0.273106	0.0442728	-6.16871	6.88473e-10	2.8826e-08	SLC45A1	50651	10.3473	10.4867	10.3087	10.737	10.6498	10.7342	10.5725	10.7117	10.5846	10.1573	10.3813	10.2675	10.3139	10.2117	10.3229	10.8216	11.0562	10.8606	10.6017	10.3511	10.4788	10.3894	10.5901	10.6231	10.3244	10.1376	9.80315	10.2143	10.3859	10.1713	SLC45A1	50651	-0.295907	0.276031	-0.268951	0.25302	-0.262464	0.0951208	-0.221138	0.320481	-0.2477
ENSG00000243477	368.384	-0.299899	0.0486212	-6.16806	6.91314e-10	2.88869e-08	NAA80	24142	8.27369	8.28543	8.15106	8.51085	8.52907	8.48709	8.8683	9.01228	8.673	8.71437	8.75939	8.64713	8.73064	8.61245	8.64991	8.98845	9.31935	8.95615	8.9255	8.84374	8.94258	8.85288	9.14979	8.92627	8.71988	8.47964	8.32443	8.40714	8.75525	8.54281	NAA80	24142	-0.262904	0.817954	-0.617023	0.0783499	-0.35688	0.0825884	-0.226072	0.551189	-0.318247
ENSG00000196850	1750.86	-0.222974	0.0361647	-6.16551	7.02547e-10	2.92976e-08	PPTC7	160760	10.46	10.4851	10.684	10.7706	10.7955	10.7456	10.6898	10.5278	10.6518	10.7471	10.7401	10.8223	10.3121	10.3753	10.4449	10.6784	10.6419	10.7397	11.1008	11.1346	11.1153	10.812	10.4929	10.6646	11.2714	11.1357	11.0114	11.1782	11.243	11.3038	PPTC7	160760	-0.0603509	0.9999	-0.192224	0.526219	-0.291558	0.225298	-0.358402	0.191063	-0.169429
ENSG00000197562	1809.36	-0.257966	0.0418511	-6.16389	7.0978e-10	2.95402e-08	RAB40C	57799	10.8061	10.8467	10.6289	11.0706	10.9852	11.025	10.7999	10.9974	10.905	10.7655	10.6096	10.6144	10.7488	10.6288	10.7575	11.0795	11.181	11.1817	10.8752	10.6509	10.7268	11.0425	11.1237	11.1233	10.842	10.6578	10.3911	10.7475	10.9829	10.7771	RAB40C	57799	-0.245342	0.461399	-0.365009	0.0807689	-0.392618	0.00211638	-0.0928135	0.820477	-0.274242
ENSG00000114268	832.262	-0.310165	0.0503557	-6.15948	7.29825e-10	3.03139e-08	PFKFB4	5210	9.62689	9.50806	9.53676	9.81726	9.92633	9.95008	10.064	9.84541	9.94407	9.62995	9.6358	9.60351	9.56725	9.51595	9.47596	10.2509	10.6698	10.5024	9.82678	9.64212	9.63716	9.69125	9.82993	9.62618	9.65418	9.48319	9.31072	9.52948	9.8398	9.71629	PFKFB4	5210	-0.55309	0.000588731	-0.865496	4.10813e-05	-0.209709	0.289301	-0.0891674	0.874039	-0.319336
ENSG00000185917	574.262	0.223935	0.03638	6.15544	7.48678e-10	3.10351e-08	SETD4	54093	9.48858	9.45235	9.33147	9.26512	9.138	9.11071	9.62034	9.47182	9.33153	9.33976	9.39014	9.34451	9.59579	9.54574	9.38197	9.45309	9.34389	9.27354	9.06283	9.21314	9.09802	9.18724	9.30984	9.19821	9.05493	9.2382	9.17828	9.20131	9.06766	9.0124	SETD4	54093	0.128025	0.985105	0.124769	0.833609	0.306142	0.0271089	0.252193	0.205528	0.174982
ENSG00000134532	129.022	1.2783	0.207763	6.15266	7.61925e-10	3.15216e-08	SOX5	6660	8.30354	7.7051	7.90926	6.78122	7.06861	6.65376	6.56974	6.40306	6.50914	6.80933	7.09643	6.7629	7.38302	7.07611	6.94119	5.9775	5.92851	5.92772	6.60147	6.4057	6.17073	6.09474	5.99758	6.13656	8.41206	8.34724	9.93364	7.97609	7.98588	8.69081	SOX5	6660	1.24714	0.364781	0.219569	0.875603	2.00747	0.0001714	0.880402	0.32143	0.705377
ENSG00000233723	61.4776	0.551952	0.0897274	6.15143	7.67886e-10	3.17053e-08	LINC01122	400955	6.85567	6.90619	6.91084	6.39705	6.5941	6.7461	6.14893	6.56314	6.32817	6.87884	6.73588	6.57278	7.8581	7.68399	7.59561	6.43872	6.52357	6.23804	6.43266	6.09828	6.17073	7.36755	7.23619	7.25142	6.32287	6.59797	6.55528	6.58901	6.33329	6.19624	LINC01122	400955	-0.0682969	0.9999	0.608671		0.598256	0.056053	0.959	0.040869	0.584865
ENSG00000119698	375.955	-0.382873	0.0622607	-6.14952	7.77185e-10	3.19627e-08	PPP4R4	57718	7.92479	8.24715	8.40112	8.56962	8.7636	8.52153	8.57103	8.41629	8.38614	9.06265	8.99703	9.2401	8.33192	8.37745	8.48861	8.52068	8.57013	8.75216	9.57813	9.4628	9.32591	8.9829	8.83971	8.79066	8.85165	8.71244	8.23106	8.6058	8.75677	8.78676	PPP4R4	57718	-0.179789	0.9999	-0.200716	0.70683	-0.542386	0.165705	-0.391104	0.546242	-0.3084
ENSG00000175602	1650.95	-0.367916	0.0598269	-6.14967	7.76465e-10	3.19627e-08	CCDC85B	11007	10.28	10.3959	10.161	10.4599	10.3099	10.4856	10.2583	10.6165	10.5142	11.2331	11.1792	11.1583	10.3887	10.222	10.4775	10.5391	10.8663	10.7741	11.6033	11.3337	11.6132	10.7838	11.1529	11.0817	10.6423	10.2145	9.98443	10.3134	10.602	10.4357	CCDC85B	11007	-0.264652	0.802206	-0.413429	0.350971	-0.668246	0.000102739	-0.340544	0.190615	-0.404762
ENSG00000145681	670.581	-0.490988	0.0798754	-6.14692	7.90009e-10	3.24261e-08	HAPLN1	1404	8.30354	8.42213	8.72641	8.92465	9.14523	9.26043	9.07521	8.86312	9.01327	9.64409	9.28891	9.52495	6.75054	6.87118	7.13015	8.98076	9.23935	9.23699	9.94967	10.0075	10.0841	7.48016	7.16988	7.11012	10.7645	10.144	10.6263	10.3883	10.6054	11.1923	HAPLN1	1404	-0.185079	0.9999	-0.143691	0.789007	-0.509803	0.468859	-0.558592	0.548141	-0.498677
ENSG00000031003	2216.53	0.436471	0.0710184	6.14589	7.95183e-10	3.25744e-08	FAM13B	51306	11.5577	11.454	11.4549	10.6004	10.7239	10.6527	11.7337	11.5488	11.524	10.3719	10.4453	10.4752	11.3055	11.2002	10.9591	11.3151	11.0605	11.2464	10.0716	9.94963	9.93468	10.8293	10.5252	10.6512	11.5271	11.7289	11.3469	11.8001	11.782	11.6687	FAM13B	51306	0.406925	0.857664	0.74297	0.0129643	0.506073	0.169081	0.465392	0.35473	-0.0258896
ENSG00000166313	9303.87	-0.215823	0.0351212	-6.1451	7.99128e-10	3.26718e-08	APBB1	322	13.2615	13.3084	13.1972	13.5222	13.5505	13.5624	13.1932	13.2709	13.336	13.0288	12.9584	12.8747	13.1104	13.1087	13.1483	13.3926	13.5072	13.4846	13.2055	12.9626	13.0607	13.309	13.4806	13.3993	12.9725	12.7746	12.4907	12.8595	12.9333	12.8074	APBB1	322	-0.19034	0.671446	-0.224748	0.117961	-0.273891	0.0285403	-0.126693	0.620398	-0.193223
ENSG00000169490	2005.78	-0.188284	0.0306615	-6.14073	8.2141e-10	3.35171e-08	TM2D2	83877	10.9452	11.0244	10.9708	11.0145	11.0394	10.972	11.0096	11.0089	11.0111	11.0943	11.0237	11.0001	10.6557	10.5705	10.6662	11.1132	11.2108	11.1548	11.3986	11.2311	11.2681	10.7933	10.9699	10.8957	11.1466	10.9078	10.7776	10.969	11.089	11.0513	TM2D2	83877	-0.149069	0.559415	-0.118812	0.735227	-0.262797	0.00130676	-0.268678	0.00250122	-0.217958
ENSG00000047617	31.9117	0.920424	0.149952	6.13813	8.34981e-10	3.3938e-08	ANO2	57101	6.83422	6.8208	6.84568	6.57683	6.6394	6.24586	6.49703	6.53792	6.1512	6.09977	6.01468	5.76785	6.83919	6.71797	6.76973	6.15452	6.06113	6.38145	5.51486	5.64895	5.52058	5.62145	6.13471	6.30536	5.82697	5.94763	6.32844	6.18472	5.7282	5.84669	ANO2	57101	0.437058	0.98067	0.704529		1.43053	0.000278827	1.31558		0.956255
ENSG00000172602	70.0433	0.693353	0.112956	6.13828	8.34209e-10	3.3938e-08	RND1	27289	6.91795	7.18416	6.93184	6.70848	6.44695	6.97364	6.90715	6.98261	6.78301	7.30766	7.16853	6.96191	7.79641	7.56376	7.50035	6.7469	6.74596	6.53857	6.49165	6.74125	6.66663	6.94116	6.66087	6.90521	6.45029	6.41117	6.80928	6.84513	6.30523	6.44034	RND1	27289	0.361072	0.999377	1.30256	0.0171824	1.16506	0.00216189	0.843246	0.132041	0.56377
ENSG00000185669	99.2522	-0.689578	0.112389	-6.13564	8.48158e-10	3.44065e-08	SNAI3	333929	6.64803	6.84269	6.97286	7.25031	7.17533	7.36975	6.76493	6.65907	6.76048	7.11056	6.73588	6.70272	6.65514	6.33827	6.61347	6.76621	6.97308	6.99978	7.29253	7.20897	6.93858	7.35444	7.11435	6.92097	7.78979	7.72984	7.55213	7.60551	8.52573	8.48572	SNAI3	333929	-0.309338	0.9999	-0.758092	0.134704	-0.993939	0.0861502	-0.456346	0.727958	-0.850446
ENSG00000100116	819.007	-0.296551	0.0484282	-6.12352	9.15321e-10	3.7044e-08	GCAT	23464	9.39183	9.44565	9.34265	9.85432	9.79264	9.80663	9.69955	9.84775	9.94173	9.6604	9.58612	9.63876	9.12488	9.1022	9.34028	10.0288	10.263	10.1147	9.90663	9.6727	9.63418	9.36925	9.55746	9.58003	10.2728	10.0121	9.75725	10.0921	10.26	10.0683	GCAT	23464	-0.316872	0.76351	-0.0858605	0.918994	-0.338147	0.196382	-0.123519	0.87224	-0.257839
ENSG00000189114	441.385	-0.257697	0.042086	-6.12311	9.17678e-10	3.7044e-08	BLOC1S3	388552	8.66654	8.6673	8.76578	8.91463	8.92779	9.01758	8.67215	8.8815	8.93077	8.98319	8.93377	8.84174	8.81507	8.79496	8.8364	9.26027	9.32288	9.17391	9.07586	8.89191	8.99007	9.05561	9.08529	8.87356	9.08488	8.91762	8.79751	8.95464	9.20017	9.07825	BLOC1S3	388552	-0.458678	0.0103659	-0.285358	0.515369	-0.212027	0.240485	-0.0763865	0.894625	-0.260111
ENSG00000185818	3223.1	-0.239747	0.0391553	-6.12296	9.18504e-10	3.7044e-08	NAT8L	339983	11.8785	11.8682	11.698	11.9532	11.9382	11.9565	11.8095	11.9874	11.9237	11.4428	11.4878	11.3305	11.4636	11.3515	11.3593	11.9232	11.9547	11.9597	11.8452	11.6003	11.723	11.7215	11.7667	11.8627	11.531	11.1965	11.096	11.1702	11.4886	11.3549	NAT8L	339983	-0.0323029	0.9999	-0.183642	0.445003	-0.396602	0.00265319	-0.311899	0.0605994	-0.3158
ENSG00000128245	29042.3	-0.239425	0.039108	-6.12214	9.23256e-10	3.71637e-08	YWHAH	7533	14.7708	14.8667	14.8289	15.1239	15.0995	15.0594	14.8918	14.9872	15.0526	14.3502	14.3497	14.2845	14.3185	14.2408	14.3952	15.175	15.3261	15.3375	14.6606	14.4267	14.4674	14.4231	14.6168	14.5889	15.1984	15.006	14.6151	15.085	15.1326	15.0148	YWHAH	7533	-0.298292	0.216874	-0.258294	0.00789417	-0.223144	0.169148	-0.195398	0.388009	-0.203194
ENSG00000138801	3099.32	-0.141469	0.0231388	-6.11396	9.71883e-10	3.90457e-08	PAPSS1	9061	11.9221	11.8819	11.9691	12.1622	12.0887	12.0478	11.7916	11.8582	11.9272	11.3991	11.3589	11.2851	11.6882	11.681	11.6379	12.0176	11.9467	11.9359	11.6489	11.5055	11.3816	11.819	11.8495	11.8108	10.6725	10.5642	10.5649	10.571	10.664	10.6463	PAPSS1	9061	-0.103772	0.9999	-0.114243	0.566551	-0.15678	0.424621	-0.172723	0.541444	-0.101516
ENSG00000088808	1772.94	-0.198406	0.0324547	-6.11331	9.75885e-10	3.91311e-08	PPP1R13B	23368	10.7071	10.853	10.7201	11.0121	10.9455	10.9808	10.883	10.9635	10.9026	10.6396	10.5558	10.6481	10.8032	10.7742	10.7137	10.9839	11.0252	10.9941	10.9419	10.8989	10.8854	10.9097	10.8146	10.9079	10.8208	10.6881	10.4592	10.7019	10.9722	10.8093	PPP1R13B	23368	-0.0811193	0.9999	-0.157213	0.552295	-0.114071	0.390278	-0.304282	0.00468139	-0.259452
ENSG00000151729	5877.1	-0.194569	0.031868	-6.10546	1.02506e-09	4.1024e-08	SLC25A4	291	12.3467	12.4233	12.4355	12.6647	12.6291	12.6339	12.3229	12.4689	12.4698	12.7089	12.6641	12.7414	12.0904	12.081	12.2244	12.574	12.7393	12.6556	12.9329	12.7964	12.8171	12.2613	12.34	12.3481	12.6774	12.4903	12.2422	12.6163	12.6054	12.5783	SLC25A4	291	-0.232216	0.163487	-0.104162	0.731361	-0.182623	0.113796	-0.147458	0.369936	-0.166835
ENSG00000156795	617.063	-0.272632	0.0446654	-6.10387	1.03529e-09	4.13543e-08	NTAQ1	55093	9.20016	9.27477	9.40439	9.5238	9.46092	9.50282	9.16845	9.15115	9.28069	9.35704	9.31203	9.23682	9.45037	9.62228	9.62854	9.37903	9.45429	9.52662	9.4836	9.33297	9.48001	9.99782	10.1823	9.87383	9.02231	8.83446	8.6821	8.90645	9.03937	8.96334	NTAQ1	55093	-0.269311	0.39778	-0.348862	0.376978	-0.481626	2.79262e-05	-0.143874	0.628569	-0.224752
ENSG00000105464	794.352	-0.288686	0.0473072	-6.10237	1.04504e-09	4.16638e-08	GRIN2D	2906	10.3149	10.4554	10.2526	10.6599	10.5704	10.4261	8.84188	8.96139	9.04846	10.0087	9.64795	9.86178	10.0575	9.90609	9.67041	9.1549	9.15065	9.33248	10.2467	10.1933	10.2332	10.1783	10.1758	10.2384	7.62302	7.42719	7.34806	7.51576	7.48569	7.65861	GRIN2D	2906	-0.283927	0.950595	-0.309116	0.218956	-0.325247	0.287949	-0.399306	0.273952	-0.218279
ENSG00000010256	4567.77	-0.187799	0.0307807	-6.10119	1.05284e-09	4.18945e-08	UQCRC1	7384	11.9919	11.9455	11.8971	12.2206	12.105	12.1017	12.1007	12.2133	12.2334	12.3157	12.2448	12.3338	11.8043	11.8149	11.9598	12.2928	12.3802	12.3344	12.4844	12.3327	12.4469	12.012	12.1802	12.2153	12.3272	12.0809	11.9494	12.1876	12.2245	12.2033	UQCRC1	7384	-0.148624	0.739609	-0.130577	0.719382	-0.278117	0.00448829	-0.126698	0.487324	-0.181899
ENSG00000172115	8396.49	-0.22227	0.0364469	-6.09847	1.07086e-09	4.25303e-08	CYCS	54205	12.8997	12.9774	13.1025	13.2811	13.2521	13.2331	13.0377	13.0745	13.1818	13.1175	12.9428	13.1074	12.5144	12.4205	12.5696	13.2818	13.2716	13.3194	13.3162	13.1894	13.1287	12.6898	12.8004	12.6972	13.2347	12.9987	12.6514	13.093	13.1923	13.1571	CYCS	54205	-0.187875	0.461399	-0.18013	0.36002	-0.226067	0.0376528	-0.157711	0.322476	-0.271995
ENSG00000259203	288.72	0.461351	0.0757198	6.09288	1.109e-09	4.39616e-08	NA	NA	8.67225	8.89631	9.01938	8.3855	8.4783	8.42083	8.67215	8.45373	8.57359	9.2221	9.31203	9.09521	8.44917	8.29355	8.48163	8.42152	8.05004	8.39329	8.88654	8.58679	8.79521	7.71179	7.75681	7.99519	7.06316	7.38501	7.22204	7.71122	7.46123	7.21906	NA	NA	0.322867	0.982289	0.404342	0.686793	0.720676	0.0526484	0.503299	0.351208	0.280764
ENSG00000065534	683.212	-0.43832	0.0719912	-6.08852	1.13959e-09	4.50886e-08	MYLK	4638	8.34716	8.3079	8.40826	8.57601	8.64094	8.61102	8.32533	8.09085	8.39989	10.5846	10.1743	10.5629	8.74954	8.7529	9.26529	8.57804	8.22015	8.64434	11.1114	11.1914	11.0861	9.64234	9.39348	9.48804	9.31759	9.20612	8.90332	8.94577	9.20737	9.24599	MYLK	4638	-0.2504	0.9999	-0.295465	0.492956	-0.621263	0.378756	-0.701865	0.440673	-0.259949
ENSG00000156875	1890.49	-0.197699	0.032483	-6.08623	1.15598e-09	4.56504e-08	MFSD14A	64645	10.8853	10.9257	10.927	11.1975	11.2777	11.1692	10.8236	10.9121	10.9416	10.8163	10.764	10.6652	10.7246	10.7573	10.7481	11.1522	11.0731	11.1417	10.8553	10.9689	10.7843	11.1421	10.9008	10.8701	10.8547	10.847	10.7356	10.846	10.9569	10.8931	MFSD14A	64645	-0.228937	0.0127937	-0.233875	0.21999	-0.234598	0.000921468	-0.127722	0.283752	-0.0974868
ENSG00000071246	3480.43	-0.196133	0.0322557	-6.08057	1.19754e-09	4.72022e-08	VASH1	22846	11.772	11.8043	11.7527	12.0589	12.048	12.0794	11.9829	12.0505	11.9793	11.7343	11.7503	11.6156	11.6972	11.7163	11.7577	12.1298	12.0772	12.1786	12.0067	11.8147	11.8047	11.9136	11.7038	11.9711	11.2475	11.135	11.004	11.168	11.4613	11.29	VASH1	22846	-0.121042	0.960424	-0.152636	0.603155	-0.142315	0.31364	-0.181671	0.274861	-0.240264
ENSG00000109111	3711.13	0.143312	0.0235795	6.07781	1.21836e-09	4.7932e-08	SUPT6H	6830	11.698	11.7014	11.5999	11.5476	11.43	11.4888	11.8856	11.9505	11.9112	11.8342	11.7692	11.7579	11.8103	11.7923	11.896	11.7422	11.748	11.8432	11.7176	11.6381	11.6222	11.7059	11.5747	11.6622	12.2619	12.3619	12.4831	12.3708	12.349	12.349	SUPT6H	6830	0.14603	0.292747	0.196484	0.339285	0.19176	0.00443084	0.128586	0.193183	0.0823256
ENSG00000172687	1022.46	-0.200055	0.0329255	-6.07601	1.23212e-09	4.83821e-08	ZNF738	148203	10.1717	10.1236	10.4076	10.4854	10.3986	10.3922	10.1921	10.223	10.2609	9.73493	9.68676	9.82947	9.65266	9.50924	9.66275	10.4599	10.3743	10.2471	9.96374	9.92905	9.95153	9.80554	9.78582	9.83114	10.1184	9.96906	9.92173	9.99833	10.127	10.2973	ZNF738	148203	-0.139651	0.995764	-0.256502	0.506373	-0.208328	0.3272	-0.210013	0.494846	-0.234516
ENSG00000108395	2925.4	-0.219818	0.0361864	-6.07459	1.24303e-09	4.87189e-08	TRIM37	4591	11.4183	11.4639	11.4863	11.775	11.8199	11.755	11.6517	11.514	11.5617	11.3089	11.2285	11.3258	11.4135	11.365	11.4572	11.6791	11.6945	11.6556	11.5692	11.5938	11.4467	11.7521	11.6392	11.6046	11.501	11.5058	11.1392	11.5239	11.6027	11.5528	TRIM37	4591	-0.0970018	0.9999	-0.17275	0.42501	-0.255747	0.181617	-0.256306	0.30179	-0.156974
ENSG00000203880	1285.64	0.230361	0.0379341	6.07266	1.25811e-09	4.92172e-08	PCMTD2	55251	10.391	10.42	10.4392	10.2255	10.0678	10.1082	10.3476	10.3402	10.4235	10.2875	10.3463	10.4299	10.5237	10.5486	10.5811	10.1688	10.1364	10.1281	10.0187	10.1307	10.146	10.3611	10.3241	10.3621	10.6062	10.6641	10.9856	10.5544	10.5131	10.6507	PCMTD2	55251	0.24184	0.106922	0.346519	0.192397	0.213732	0.0294658	0.266856	0.0162982	0.15464
ENSG00000273015	1149.04	0.175697	0.0289402	6.07104	1.27088e-09	4.9624e-08	NA	NA	10.5431	10.5379	10.6485	10.3786	10.3573	10.2979	10.5765	10.4547	10.5861	10.1424	10.2096	10.178	10.3021	10.3257	10.2076	10.3599	10.3537	10.3418	10.0142	9.97661	9.96345	10.0985	10.1709	10.0751	9.84519	9.98116	9.8073	10.0277	9.86449	9.84144	NA	NA	0.200826	0.98067	-0.00938755	0.989953	0.175203	0.571442	0.200676	0.673997	0.0948986
ENSG00000144191	68.0928	0.7631	0.12577	6.06745	1.29957e-09	5.06492e-08	CNGA3	1261	7.87566	7.49609	7.47183	7.20002	7.30108	7.15426	6.41955	6.40306	6.45191	6.91223	6.78396	6.89306	7.33244	7.50983	7.29551	6.27712	6.01891	6.07257	6.7496	6.89009	6.95883	6.848	6.77648	6.77166	5.83516	6.54577	6.47094	6.78888	5.9546	6.01766	CNGA3	1261	0.633495	0.84221	0.291756	0.834422	0.900703	0.0140652	-0.00578852	0.998036	1.48188
ENSG00000072062	8376.26	-0.211069	0.0347976	-6.06563	1.31438e-09	5.11309e-08	PRKACA	5566	12.9847	13.0149	13.027	13.1989	13.2415	13.1889	13.1238	13.1296	13.2868	12.9298	12.959	12.8789	12.7287	12.6774	12.7998	13.1844	13.3187	13.4126	13.21	13.0776	13.0593	12.9329	13.1092	13.0538	13.048	12.8653	12.5469	12.9136	13.0303	12.9571	PRKACA	5566	-0.121489	0.904751	-0.237046	0.0491277	-0.296774	0.00229754	-0.197173	0.141853	-0.23186
ENSG00000124507	546.335	-0.35912	0.0592097	-6.06521	1.31778e-09	5.11675e-08	PACSIN1	29993	9.05506	9.00981	8.85192	9.22116	9.31813	9.31731	8.01613	8.0423	8.28598	9.04852	8.98747	9.02452	9.87845	9.69644	9.3131	8.38686	8.75983	8.61924	9.10159	9.3843	9.41548	9.79144	10.0394	9.89283	9.67655	9.22836	9.15727	9.17066	9.36223	9.45124	PACSIN1	29993	-0.562468	0.9999	-0.277229	0.279377	-0.278252	0.835293	-0.318591	0.908303	-0.349926
ENSG00000134259	22.7005	1.19936	0.197892	6.06069	1.35537e-09	5.25293e-08	NGF	4803	5.4234	5.51613	5.52581	5.60741	5.15519	5.2573	4.83516	5.16369	4.83516	6.61663	6.46246	6.78233	7.39009	7.13182	7.09256	5.14789	5.17199	5.18809	6.12066	6.13713	6.24598	6.20027	6.19694	6.40503	5.3951	5.49221	5.63476	5.62019	5.34577	5.24836	NGF	4803	-1.31846		5.03848		1.65571		0.931971		1.18916
ENSG00000066032	4920.21	-0.187663	0.0309831	-6.05695	1.38724e-09	5.36647e-08	CTNNA2	1496	12.4811	12.471	12.528	12.7922	12.7457	12.7462	12.4438	12.3987	12.4694	11.6942	11.5578	11.5649	11.9283	11.8251	11.8357	12.5775	12.5439	12.6339	11.9047	11.7826	11.7272	12.1286	11.9935	12.0289	12.4182	12.4054	12.0986	12.4284	12.4735	12.4503	CTNNA2	1496	-0.14462	0.655123	-0.221056	0.101722	-0.186753	0.0537191	-0.204139	0.072883	-0.132257
ENSG00000103507	967.527	-0.206415	0.0341262	-6.04858	1.46131e-09	5.64255e-08	BCKDK	10295	9.69834	9.71431	9.61869	9.88279	9.85555	10.0355	9.81245	9.92707	9.77087	10.339	10.2912	10.124	10.0214	9.99269	10.0915	9.98345	10.1662	10.0601	10.5009	10.2735	10.3303	10.198	10.3227	10.2678	9.82953	9.56406	9.62715	9.56585	9.73079	9.68064	BCKDK	10295	-0.241396	0.806418	-0.435469	0.0452026	-0.236707	0.261998	-0.124061	0.797856	-0.178743
ENSG00000135766	2039.15	-0.174327	0.0288227	-6.04826	1.46423e-09	5.64337e-08	EGLN1	54583	11.1208	11.074	11.1013	11.2737	11.2752	11.1967	11.1027	10.9363	11.0774	10.9596	10.9434	10.9767	10.8882	10.7991	10.8076	11.1088	11.2759	11.3267	11.281	11.0302	11.0807	11.0768	11.0537	10.9851	10.9091	10.7959	10.6622	10.8286	10.8779	10.8868	EGLN1	54583	-0.200002	0.216874	-0.40788	0.0054362	-0.209168	0.0247089	-0.18065	0.138592	-0.13405
ENSG00000196358	8763.42	-0.365412	0.0604335	-6.04651	1.48013e-09	5.69414e-08	NTNG2	84628	13.0177	13.0673	12.8474	13.2125	13.2001	13.1178	13.3732	13.566	13.5999	12.795	12.8705	12.8177	11.9312	11.9889	12.2945	13.5484	13.8053	13.8173	13.4774	13.1084	13.3441	12.4676	12.3283	12.7165	13.3998	12.9777	12.4748	13.0801	13.3861	13.255	NTNG2	84628	-0.208604	0.9999	-0.17141	0.537114	-0.4339	0.428326	-0.494553	0.504346	-0.485112
ENSG00000112640	2979.15	-0.164098	0.0271524	-6.04359	1.5072e-09	5.78759e-08	PPP2R5D	5528	11.6563	11.6287	11.6252	11.7159	11.8148	11.7508	11.6827	11.739	11.8069	11.3802	11.3431	11.2628	11.3699	11.3341	11.3593	11.7636	11.8001	11.8586	11.573	11.4123	11.5387	11.6122	11.5679	11.556	11.5668	11.3248	11.2182	11.4239	11.5702	11.4502	PPP2R5D	5528	-0.0587788	0.9999	-0.17049	0.340804	-0.225417	0.00338307	-0.185242	0.0608208	-0.212672
ENSG00000124571	2634.89	0.21242	0.0351523	6.04287	1.514e-09	5.80301e-08	XPO5	57510	11.28	11.2455	11.2549	11.143	11.1339	11.1475	11.4032	11.2873	11.3085	11.4708	11.5367	11.5197	11.403	11.5574	11.6881	11.1462	11.1751	11.1987	11.4046	11.1515	11.1687	11.4647	11.2634	11.3715	11.4585	11.7739	11.6524	11.8682	11.5464	11.3926	XPO5	57510	0.168278	0.788655	0.517895	0.00131811	0.192663	0.152164	0.267126	0.0597039	0.302886
ENSG00000170412	1397.16	0.341471	0.056529	6.04064	1.53501e-09	5.87277e-08	GPRC5C	55890	10.7655	10.9495	10.8246	10.5384	10.5144	10.4694	10.4986	10.6846	10.7241	10.8111	10.9459	10.9952	9.80577	9.84487	10.2409	10.3877	10.565	10.452	10.6402	10.3373	10.5797	9.39435	9.3009	9.57768	10.5386	10.7762	10.483	10.8144	10.5927	10.3767	GPRC5C	55890	0.180803	0.9999	0.240861	0.505562	0.59128	0.0731233	0.406753	0.424563	0.198126
ENSG00000138073	1918.61	-0.17027	0.0282058	-6.03672	1.57281e-09	6.00635e-08	PREB	10113	10.8113	10.812	10.7385	10.9303	10.8746	10.9244	10.9554	11.0316	10.9169	11.0096	10.9871	10.9874	10.6571	10.6789	10.7218	11.033	11.181	11.0454	11.2565	11.0641	11.0992	10.9292	10.9463	11.0183	11.0788	10.8504	10.7816	10.9478	11.0099	10.9588	PREB	10113	-0.117091	0.952459	-0.149876	0.647839	-0.284992	0.00464332	-0.152897	0.358763	-0.162882
ENSG00000107140	1508.23	-0.206501	0.034212	-6.03593	1.58051e-09	6.02472e-08	TESK1	7016	10.5037	10.4654	10.3331	10.7511	10.7359	10.7279	10.4623	10.6165	10.4824	10.7515	10.7215	10.6542	10.8438	10.8011	10.8152	10.5929	10.7282	10.7251	10.9156	10.8217	10.9249	11.0622	10.929	11.1946	10.0465	9.9189	9.73944	9.86384	9.99516	9.84441	TESK1	7016	-0.159792	0.793072	-0.0375028	0.939272	-0.24996	0.0259627	-0.185743	0.25966	-0.132378
ENSG00000142657	5459.3	-0.221306	0.0366792	-6.03356	1.6039e-09	6.10273e-08	PGD	5226	12.4545	12.4364	12.3883	12.8222	12.7712	12.7982	12.5153	12.5897	12.6941	12.0421	12.1283	11.983	12.1325	12.1423	12.2773	12.8823	12.8613	12.8978	12.3055	11.9859	12.0287	12.3029	12.5015	12.327	12.4167	12.157	12.1771	12.2833	12.4314	12.3359	PGD	5226	-0.276343	0.659917	-0.172306	0.295066	-0.193381	0.408542	-0.0637493	0.935133	-0.194274
ENSG00000186462	4081.26	-0.24057	0.0399076	-6.02817	1.65826e-09	6.29808e-08	NAP1L2	4674	11.9562	12.0982	12.0954	12.3927	12.3869	12.4029	12.0727	12.0555	12.0776	11.4911	11.3782	11.4556	11.7891	11.7289	11.7674	12.2387	12.222	12.3563	11.8609	11.7393	11.6297	11.9515	12.0164	11.8603	12.2098	12.1574	11.7097	12.1866	12.2169	12.1507	NAP1L2	4674	-0.202521	0.597693	-0.32368	0.00442915	-0.181701	0.216777	-0.31085	0.0266505	-0.162214
ENSG00000008256	2746.78	-0.236023	0.0391872	-6.02297	1.7125e-09	6.49224e-08	CYTH3	9265	10.8755	11.0587	11.0882	11.1578	11.2045	11.2333	11.2044	11.3187	11.3255	11.1481	11.1161	11.1943	11.4489	11.537	11.6953	11.3066	11.4145	11.3779	11.5241	11.4115	11.4669	11.9356	11.8602	12.0464	11.6595	11.4701	11.6011	11.5742	11.887	11.6287	CYTH3	9265	-0.0792462	0.9999	-0.253021	0.229927	-0.388541	0.00483598	-0.323532	0.0611039	-0.188034
ENSG00000139531	944.456	-0.2211	0.0367453	-6.0171	1.77566e-09	6.71948e-08	SUOX	6821	9.86906	9.7823	9.82122	10.0495	9.91794	9.89701	10.041	10.0536	10.1049	9.49346	9.53467	9.62627	9.49252	9.49574	9.61113	10.0344	10.2464	10.1653	9.84969	9.63367	9.83181	9.82181	9.82579	9.84096	10.5761	10.2458	10.0976	10.2682	10.4357	10.452	SUOX	6821	-0.0818478	0.9999	-0.0195369	0.978336	-0.313812	0.00494348	-0.23952	0.129057	-0.298935
ENSG00000102445	32.9467	1.37716	0.229088	6.01149	1.83822e-09	6.94362e-08	RUBCNL	80183	6.3007	6.70528	6.4254	6.25941	5.72789	6.21826	5.91959	5.40177	5.7813	6.71671	6.10371	6.45265	7.2799	7.34177	6.8411	5.5291	5.87978	5.18809	6.07962	5.71228	6.04657	5.88942	5.96008	5.93449	5.92793	6.47387	7.25073	6.26772	5.97439	6.09289	RUBCNL	80183	0.469298	0.9999	0.826225	0.289277	2.43424	0.0112895	1.12547	0.560948	1.52625
ENSG00000116191	1643.9	-0.211974	0.0353069	-6.00376	1.92801e-09	7.2696e-08	RALGPS2	55103	10.8606	10.8555	10.9969	11.1536	11.214	11.1568	10.87	10.7092	10.8463	10.512	10.3667	10.4612	10.4574	10.4988	10.2603	11.0068	10.7995	10.9819	10.7712	10.723	10.6624	10.7059	10.548	10.5243	10.5089	10.4823	10.4326	10.5071	10.7048	10.7404	RALGPS2	55103	-0.122166	0.9999	-0.20976	0.588107	-0.189558	0.318369	-0.282852	0.163369	-0.190314
ENSG00000072954	1009.46	-0.275258	0.0458582	-6.00238	1.94443e-09	7.3183e-08	TMEM38A	79041	9.33912	9.43555	9.32021	9.46679	9.60657	9.48307	9.79195	9.80038	9.79693	10.4624	10.4278	10.4199	9.7156	9.53092	9.46542	9.98152	10.2408	10.0877	10.7778	10.7349	10.7613	9.66055	9.9143	9.85652	10.4831	10.1538	9.86615	10.3664	10.3732	10.3657	TMEM38A	79041	-0.324258	0.97092	0.00109453	0.998671	-0.254056	0.588127	-0.334905	0.593936	-0.278894
ENSG00000255717	784.722	0.260746	0.0434506	6.00096	1.96153e-09	7.36935e-08	SNHG1	23642	9.75306	9.73916	9.86318	9.59125	9.44639	9.58152	9.27584	9.21042	9.20478	10.1173	10.3105	10.3995	9.79026	9.91626	9.89367	9.11331	9.0476	8.90003	9.77984	10.1085	10.1954	9.52511	9.5297	9.58938	9.71073	9.71333	9.94026	9.7806	9.51902	9.58322	SNHG1	23642	0.231343	0.887952	0.0722493	0.918446	0.344902	0.0700328	0.252062	0.368222	0.217162
ENSG00000149743	316.899	-0.291987	0.0486789	-5.99823	1.99478e-09	7.48077e-08	TRPT1	83707	8.1962	8.23937	8.18484	8.3336	8.50109	8.36768	8.43586	8.34499	8.28598	8.64553	8.73102	8.62209	8.58785	8.46714	8.47108	8.71908	8.79084	8.37085	8.77359	8.64427	8.8322	8.80677	8.98462	8.78659	8.65698	8.25043	8.37173	8.22017	8.50873	8.52155	TRPT1	83707	-0.336082	0.308085	-0.166805	0.83064	-0.40143	0.00522198	-0.100734	0.837424	-0.338718
ENSG00000151014	274.648	-0.260446	0.0434332	-5.99647	2.01658e-09	7.54895e-08	NOCT	25819	8.28121	8.28543	8.22596	8.5175	8.39555	8.46703	7.95524	7.89489	8.05281	8.7233	8.52148	8.61703	8.32109	8.38115	8.25424	8.0959	8.27993	8.26931	8.88159	8.87284	8.90837	8.59505	8.5732	8.62267	8.0955	7.95996	7.7671	7.9886	8.04077	8.06929	NOCT	25819	-0.298799	0.831554	-0.748186	0.0262862	-0.323295	0.168142	-0.301293	0.345885	-0.200886
ENSG00000134986	8898.52	0.208652	0.0347994	5.99584	2.02436e-09	7.5645e-08	NREP	9315	13.6734	13.6516	13.7756	13.6087	13.587	13.4332	12.8933	12.9385	12.9521	13.5906	13.7017	13.7828	13.1405	13.1769	13.2666	12.7667	12.6732	12.784	13.4878	13.3122	13.3016	13.0195	12.8859	12.9988	11.9824	12.1736	11.8943	12.2287	11.988	11.9168	NREP	9315	0.192353	0.995764	0.385903	4.9621e-05	0.231263	0.460156	0.324214	0.372601	0.143269
ENSG00000104327	463.92	-0.720694	0.120244	-5.99359	2.05256e-09	7.64602e-08	CALB1	793	8.57801	8.71836	8.56346	9.17161	9.18432	9.27773	7.15186	6.90909	7.02635	7.81296	6.93919	7.37587	10.0704	10.071	9.45836	7.29394	7.34938	7.48863	8.54215	8.45799	7.86101	11.1017	11.2032	10.7472	7.30728	7.49011	7.56471	7.3225	7.61551	7.61499	CALB1	793	-0.512226	0.98067	-0.388731	0.796733	-1.1819	0.0101215	-1.14617	0.040869	-0.0848958
ENSG00000160058	2464.75	0.208718	0.0348239	5.99352	2.05351e-09	7.64602e-08	BSDC1	55108	11.4633	11.5263	11.4737	11.3736	11.4077	11.3657	11.3018	11.3739	11.3112	11.4053	11.3561	11.3729	11.5089	11.5096	11.3344	11.299	11.1041	11.2433	11.244	11.2028	11.0937	10.989	10.9913	11.085	11.2135	11.2767	11.3563	11.3472	11.1673	11.0805	BSDC1	55108	0.11891	0.527533	0.239824	0.106653	0.443897	2.5492e-17	0.199971	0.00483162	0.172061
ENSG00000166347	500.454	-0.311351	0.0519693	-5.99105	2.08491e-09	7.74911e-08	CYB5A	1528	9.01524	8.93515	9.06512	9.18415	9.11978	9.16444	9.02328	9.08141	9.09549	9.20946	8.7982	9.11324	8.79442	8.80048	9.08416	9.3163	9.37144	9.25741	9.51898	9.27612	9.21448	9.12856	9.38505	9.42937	9.2012	8.83217	8.69564	8.94131	9.08881	9.02751	CYB5A	1528	-0.26878	0.78382	-0.312587	0.565553	-0.465373	0.011422	-0.318975	0.237554	-0.31718
ENSG00000092621	1531.97	0.394268	0.065821	5.99	2.09835e-09	7.78518e-08	PHGDH	26227	10.5322	10.3429	10.2546	9.70869	9.64015	9.73126	9.31952	9.25684	9.39095	10.8184	11.1549	10.8622	10.92	11.1063	11.2949	9.01129	9.09386	9.0482	10.696	10.3321	10.4604	10.7183	10.7765	11.1824	11.3122	11.438	11.2227	11.556	11.0536	11.0268	PHGDH	26227	0.305016	0.760008	1.01544	9.04423e-06	0.216422	0.409518	0.46242	0.0451799	0.279154
ENSG00000167363	1924.27	-0.248173	0.04145	-5.98728	2.13375e-09	7.90244e-08	FN3K	64122	10.8631	10.9293	10.7581	11.1171	11.069	10.9957	10.9086	11.076	11.0603	10.7784	10.9211	10.8843	10.6262	10.6774	10.7703	11.1097	11.3434	11.1274	11.1344	10.99	11.0374	10.8085	11.0251	11.0718	11.1104	10.8087	10.4608	10.7945	11.0337	10.9369	FN3K	64122	-0.178916	0.814171	-0.0267865	0.965618	-0.286877	0.0344604	-0.200305	0.321904	-0.344273
ENSG00000132825	1109.34	-0.357627	0.0597551	-5.98488	2.16552e-09	8.0059e-08	PPP1R3D	5509	9.34982	9.47555	9.58459	9.94791	9.89673	9.69526	9.8559	9.82899	10.0012	10.5809	10.3958	10.44	9.73328	9.82478	10.2181	9.97767	10.0238	10.1192	10.9442	10.7789	10.9139	10.5598	10.2534	10.4672	10.3739	10.113	9.72416	10.2537	10.3434	10.2592	PPP1R3D	5509	-0.146924	0.9999	-0.461602	0.0450621	-0.512419	0.017788	-0.421999	0.12573	-0.294091
ENSG00000148154	2341.26	-0.159022	0.0265784	-5.9831	2.1893e-09	8.0795e-08	UGCG	7357	11.2948	11.2388	11.4524	11.5075	11.4476	11.4481	10.842	10.8154	10.9439	11.1992	11.2386	11.2867	11.1966	11.2137	11.188	11.0283	10.9711	11.0824	11.4378	11.4222	11.3619	11.5106	11.3788	11.4062	11.1101	11.0113	10.973	11.1378	11.1316	11.1621	UGCG	7357	-0.158608	0.216874	0.0242037	0.964608	-0.234675	9.95308e-05	-0.171349	0.0310439	-0.0976581
ENSG00000169641	1545.63	-0.249325	0.0416821	-5.98158	2.20988e-09	8.14102e-08	LUZP1	7798	10.2365	10.2326	10.2106	10.3079	10.4031	10.2593	10.6842	10.5379	10.5391	10.5043	10.3066	10.5772	9.86618	9.89328	10.0812	10.6961	10.6362	10.706	10.9276	10.97	10.8854	10.329	10.1279	10.2649	11.2324	11.1164	11.0646	11.1134	11.3886	11.411	LUZP1	7798	-0.0902001	0.9999	-0.180776	0.609168	-0.305078	0.26436	-0.478178	0.0754014	-0.25688
ENSG00000142875	10237	0.250599	0.041931	5.97646	2.28042e-09	8.38608e-08	PRKACB	5567	13.9242	13.9435	14.1091	13.8993	13.9518	13.8477	13.432	13.3083	13.4169	12.9412	13.0499	12.8001	13.3837	13.3237	13.0864	13.2249	13.1637	13.2893	12.7601	12.6073	12.4465	13.1336	12.9633	12.8536	13.0126	13.3738	13.4295	13.3625	12.9905	13.0113	PRKACB	5567	0.165604	0.974919	0.265362	0.162691	0.286985	0.111407	0.324829	0.116569	0.382248
ENSG00000048052	864.057	-0.546734	0.0916384	-5.96621	2.42823e-09	8.89825e-08	HDAC9	9734	9.56705	9.68335	9.91645	10.1551	10.4001	10.3036	9.93594	9.64008	9.73628	9.2221	8.86759	9.28214	8.69487	8.64351	8.60886	10.336	10.2538	10.4502	10.1142	10.4442	10.3468	9.01972	8.84383	8.80683	10.075	10.2484	10.0899	9.93105	10.1564	10.1463	HDAC9	9734	-0.602005	0.00599181	-0.275129	0.442328	-0.273098	0.286082	-1.25615	2.90008e-14	-0.0359162
ENSG00000160888	878.934	0.378131	0.0633781	5.96628	2.42728e-09	8.89825e-08	IER2	9592	10.3928	10.3608	10.2857	10.0079	9.88816	9.96082	9.30993	9.60466	9.47732	10.4874	10.5116	10.2267	10.3354	10.2772	10.0696	9.47513	9.5142	9.5063	10.1475	10.1044	10.0819	9.36925	9.60661	9.55877	9.24912	9.33954	9.52628	9.39185	8.90059	9.00975	IER2	9592	-0.0195724	0.9999	0.392985	0.301017	0.763816	6.2818e-16	0.314333	0.0132653	0.391128
ENSG00000159921	1620.26	-0.191246	0.03209	-5.95967	2.5274e-09	9.24542e-08	GNE	10020	10.6862	10.7897	10.8535	11.129	11.0413	11.0444	10.7723	10.7938	10.9322	10.3563	10.2678	10.2168	10.5284	10.5568	10.4422	10.9916	11.0056	11.0253	10.5467	10.3733	10.1974	10.7719	10.631	10.6242	10.738	10.6152	10.5594	10.6023	10.7626	10.8373	GNE	10020	-0.171758	0.449976	-0.304571	0.0767869	-0.169346	0.0980827	-0.103623	0.617017	-0.197086
ENSG00000061337	2760.7	0.311385	0.0522531	5.95917	2.5352e-09	9.25771e-08	LZTS1	11178	11.4284	11.4934	11.4106	11.0559	11.1492	11.1769	11.4551	11.4091	11.5115	12.0602	12.1877	11.8358	11.5812	11.4919	11.5642	11.4124	11.3356	11.4646	11.9108	11.4751	11.4959	11.1813	11.0024	11.3352	11.0595	11.5313	11.2477	11.5376	11.1669	10.9382	LZTS1	11178	0.0600366	0.9999	0.462751	0.00152065	0.378375	0.0280247	0.398176	0.0382284	0.394044
ENSG00000169884	336.789	-0.465395	0.0781753	-5.95323	2.62907e-09	9.5837e-08	WNT10B	7480	8.86897	8.84112	8.89312	9.14617	9.23935	9.23111	8.60292	8.40359	8.51801	8.20237	7.80208	8.07434	8.74686	8.52839	8.52983	8.6624	8.90386	8.99076	8.42434	8.53909	8.42454	9.05954	9.13645	9.1034	8.04427	7.77416	7.15599	8.01085	8.23791	7.90078	WNT10B	7480	-0.396321	0.440842	-0.175105	0.755185	-0.556654	0.00494463	-0.51146	0.0545626	-0.477476
ENSG00000164535	842.796	0.175725	0.0295372	5.94928	2.69332e-09	9.80079e-08	DAGLB	221955	9.97411	9.89713	9.90143	9.79019	9.60657	9.63169	9.59688	9.7288	9.67578	9.98299	10.054	9.94657	10.1495	10.0924	10.1275	9.5419	9.63557	9.64597	9.91631	9.78638	9.9078	9.83561	9.91819	9.93559	9.61059	9.65236	9.73673	9.70016	9.50337	9.52431	DAGLB	221955	0.075308	0.9999	0.183458	0.657652	0.241345	0.00751458	0.128419	0.455589	0.156915
ENSG00000144815	2166.26	-0.199945	0.0336115	-5.9487	2.70283e-09	9.81824e-08	NXPE3	91775	10.924	10.9221	11.0837	11.1149	11.2353	11.1262	11.1704	11.0928	11.1509	10.7163	10.75	10.819	10.887	10.9144	10.8007	11.2717	11.2136	11.2925	10.9862	11.1186	10.9127	11.2317	10.9174	10.9833	11.4101	11.3529	11.2587	11.2358	11.5337	11.6115	NXPE3	91775	-0.119753	0.9999	-0.0335142	0.949575	-0.183998	0.373178	-0.255248	0.278135	-0.245553
ENSG00000196456	869.162	-0.249912	0.0420271	-5.94645	2.74026e-09	9.9369e-08	ZNF775	285971	9.87154	9.88482	9.62175	10.0654	9.90737	9.94648	10.0439	10.1756	10.0432	9.75894	9.75015	9.6536	9.59728	9.60981	9.60314	10.1755	10.4309	10.2471	10.0673	9.79904	9.9078	9.71385	9.7024	10.0209	9.78429	9.40317	9.30779	9.43454	9.73462	9.66688	ZNF775	285971	-0.203968	0.98067	-0.0664407	0.931387	-0.22928	0.401267	-0.222215	0.597887	-0.376797
ENSG00000283646	8.76029	2.38067	0.400587	5.94296	2.79929e-09	1.01333e-07	LINC02009	105377068	4.83516	5.178	5.32583	5.32704	5.28683	5.2573	5.22645	4.83516	5.17491	6.19441	6.33256	6.28986	5.62461	5.74979	5.93004	5.37473	4.83516	5.18809	5.17736	4.83516	5.32208	5.15947	4.83516	5.13558	5.20975	6.06862	6.09358	6.50425	5.53123	5.44556	LINC02009	105377068	-0.757723		3.80951	0.0494013	3.8324		4.25138		2.66061
ENSG00000119820	2045.82	0.175415	0.0295405	5.93811	2.88323e-09	1.04191e-07	YIPF4	84272	11.1788	11.0987	11.1833	10.9933	11.0794	10.9658	10.9843	10.7865	11.0277	11.0105	10.9642	11.0231	10.933	10.8437	10.818	10.9509	10.7983	10.8817	10.7897	10.7674	10.7042	10.7257	10.7418	10.7198	11.294	11.5286	11.5743	11.5356	11.2229	11.3566	YIPF4	84272	0.0629385	0.9999	0.264179	0.257652	0.144402	0.322328	0.251508	0.0785232	0.255655
ENSG00000100401	5331.14	-0.201022	0.0338593	-5.93697	2.9033e-09	1.04735e-07	RANGAP1	5905	12.3396	12.3927	12.3	12.6407	12.6665	12.6043	12.4454	12.5527	12.525	12.3609	12.2803	12.2143	12.1017	12.0397	12.1235	12.6061	12.7787	12.6867	12.5665	12.4027	12.5018	12.28	12.3955	12.3797	12.3264	12.2307	12.0161	12.3031	12.2588	12.1445	RANGAP1	5905	-0.180077	0.559127	-0.0726136	0.848225	-0.263928	0.0132564	-0.20903	0.133514	-0.0602079
ENSG00000123933	1963.4	0.396921	0.0668594	5.93665	2.90911e-09	1.04763e-07	MXD4	10608	11.3658	11.3296	11.0759	10.9065	10.8024	10.7702	11.0052	11.1979	11.0244	10.7911	10.9123	10.8353	11.1473	10.9691	11.0034	10.7658	10.8771	10.7965	10.4879	10.3459	10.4367	10.4142	10.529	10.6197	11.3102	11.2043	11.9815	11.0486	11.0289	11.1983	MXD4	10608	0.277741	0.703874	0.304884	0.222114	0.538778	0.00190836	0.436193	0.040869	0.285019
ENSG00000204634	705.894	-0.286368	0.0482677	-5.93292	2.97601e-09	1.06988e-07	TBC1D8	11138	9.24289	9.26338	9.33893	9.41454	9.42579	9.30892	9.32905	9.49582	9.41472	9.29862	9.20905	9.32608	9.7156	9.6831	9.74778	9.5129	9.4703	9.62414	9.64661	9.45642	9.61314	10.1783	10.0869	10.2532	9.61906	9.50348	9.16296	9.52736	9.79277	9.74277	TBC1D8	11138	-0.121457	0.98067	-0.185275	0.719382	-0.483177	8.05572e-08	-0.319822	0.0138489	-0.338025
ENSG00000108176	810.363	0.278519	0.046956	5.93148	3.00212e-09	1.0774e-07	DNAJC12	56521	10.1536	10.1992	10.37	10.0878	10.1015	10.054	9.91714	9.92265	9.81743	9.81206	10.0379	9.88293	9.83629	9.92383	9.78495	9.68347	9.75011	9.62414	9.71477	9.66443	9.57945	9.39746	9.59935	9.57533	9.13554	9.36986	9.08467	9.54883	8.91962	8.96948	DNAJC12	56521	0.217099	0.883865	0.260681	0.535591	0.348091	0.0585013	0.274486	0.296636	0.369556
ENSG00000119185	1450.6	-0.19882	0.033536	-5.92854	3.05634e-09	1.09498e-07	ITGB1BP1	9270	10.5431	10.5964	10.581	10.7581	10.7395	10.7247	10.6042	10.5176	10.595	10.5235	10.3958	10.4821	10.4679	10.5173	10.3393	10.6984	10.7162	10.7178	10.6077	10.6198	10.7296	10.6301	10.8859	10.6288	10.4701	10.2346	10.0711	10.3119	10.4033	10.3078	ITGB1BP1	9270	-0.138924	0.960109	0.000284235	0.999548	-0.284323	0.0271089	-0.192986	0.326225	-0.197174
ENSG00000152642	1439.58	-0.283048	0.0477516	-5.92752	3.0754e-09	1.09992e-07	GPD1L	23171	10.304	10.3572	10.525	10.5237	10.5996	10.5319	10.4295	10.4254	10.4582	10.3549	10.234	10.3518	10.3112	10.4481	10.4801	10.4193	10.4504	10.4661	10.7334	10.684	10.7028	10.9108	10.784	10.8643	10.7199	10.4558	10.2158	10.6301	10.8668	10.7896	GPD1L	23171	-0.00285843	0.9999	-0.0481531	0.918834	-0.451861	0.00150096	-0.408747	0.0142752	-0.363941
ENSG00000274180	720.931	0.307589	0.0518955	5.92707	3.08382e-09	1.10104e-07	NATD1	256302	9.96487	9.77698	10.0174	9.8879	9.79264	9.6974	9.43872	9.46879	9.46762	9.66503	9.69557	9.60606	9.80448	9.81258	9.85923	9.47513	9.38164	9.43641	9.32175	9.11114	9.03604	9.30449	9.36232	9.3844	9.52826	9.64281	9.93695	9.68504	9.43382	9.44343	NATD1	256302	0.0338744	0.9999	0.146418	0.757354	0.513732	3.10441e-08	0.535492	4.67697e-07	0.307598
ENSG00000080166	8.13624	1.52608	0.257526	5.92594	3.10513e-09	1.10466e-07	DCT	1638	5.72574	5.99419	6.09883	5.32704	5.15519	5.35127	5.22645	5.16369	4.83516	5.79065	5.80682	5.94795	5.62461	5.8107	5.95581	5.27656	5.31045	4.83516	5.42514	5.82555	5.32208	5.29284	5.14289	5.35366	5.42499	5.70133	5.79725	5.93247	5.47159	5.48521	DCT	1638	-0.828437		0.867453		2.347		0.990377		1.32758
ENSG00000187634	864.673	-0.426711	0.0720049	-5.92614	3.1014e-09	1.10466e-07	SAMD11	148398	9.32834	9.37338	9.03785	9.43567	9.44053	9.40652	7.93012	8.26991	8.37226	10.1123	10.1033	10.0399	10.5462	10.5214	10.7129	8.25847	8.57013	8.26931	10.3359	10.2423	10.5213	11.2669	11.1496	11.4298	8.91543	8.50875	8.05032	8.50302	9.03999	8.84881	SAMD11	148398	-0.194498	0.9999	-0.630639	0.0188124	-0.707702	0.0236536	-0.301165	0.659471	-0.6542
ENSG00000065609	10828	-0.257592	0.0434704	-5.92569	3.10984e-09	1.10466e-07	SNAP91	9892	13.3508	13.4222	13.5071	13.7558	13.7901	13.7539	13.5488	13.4469	13.5318	13.0988	13.0257	13.054	13.3057	13.2924	13.2804	13.6	13.5797	13.7212	13.4674	13.22	13.2552	13.6206	13.6162	13.5308	13.2615	13.1541	12.6399	13.2269	13.3745	13.2337	SNAP91	9892	-0.12094	0.84221	-0.26001	0.0765062	-0.295223	0.00049439	-0.261484	0.00704563	-0.264021
ENSG00000166823	181.662	-0.398448	0.0672776	-5.92244	3.17196e-09	1.12481e-07	MESP1	55897	7.55052	7.67044	7.56588	7.79849	8.06845	7.96297	7.55436	7.63431	7.71886	7.85467	7.53501	7.53784	8.34266	8.38852	8.04655	7.77473	8.01518	8.08816	7.76774	8.00867	7.78668	8.5226	8.81477	8.71129	7.47825	7.182	6.98645	7.22426	7.25233	7.38811	MESP1	55897	-0.414854	0.910559	-0.908253	0.0651397	-0.491872	0.210355	-0.270585	0.770931	-0.350755
ENSG00000164620	1565.25	-0.281256	0.0475007	-5.92108	3.1983e-09	1.13222e-07	RELL2	285613	10.0849	10.215	10.1631	10.5088	10.3956	10.5639	10.6198	10.8118	10.6546	10.9128	10.8624	10.7676	10.5245	10.5189	10.6516	10.7989	11.0338	10.9572	11.0773	10.8977	11.1291	10.7502	10.8446	10.9673	10.5663	10.3368	9.89859	10.4308	10.6212	10.4445	RELL2	285613	-0.236243	0.609026	-0.113102	0.763219	-0.297746	0.0479178	-0.196132	0.410283	-0.32
ENSG00000101180	817.287	-0.466694	0.0788922	-5.91559	3.30695e-09	1.1687e-07	HRH3	11255	9.74768	9.83191	9.72778	9.81189	9.9676	9.96793	9.66614	9.96836	9.85264	9.74808	9.56062	9.79419	9.10827	8.94191	9.18617	9.77954	10.1019	10.0484	10.4284	10.2644	10.4091	9.54205	9.80068	9.89471	9.72277	9.42714	8.6855	9.28801	9.82261	9.53766	HRH3	11255	-0.151447	0.9999	-0.537355	0.00977348	-0.72714	0.00734815	-0.703059	0.0214278	-0.576945
ENSG00000114126	976.201	0.25162	0.0425423	5.91458	3.32722e-09	1.17387e-07	TFDP2	7029	10.4452	10.2785	10.303	10.0967	10.1089	10.1146	10.0894	10.0476	10.2172	9.75677	9.72742	9.77169	9.56117	9.49064	9.54096	10.051	9.86834	9.91869	9.68393	9.44679	9.71821	9.07905	9.09567	8.97712	10.3439	10.555	10.7095	10.4955	10.3717	10.5071	TFDP2	7029	0.185052	0.81512	0.396585	0.0983435	0.529802	2.21625e-05	0.139823	0.641547	0.1827
ENSG00000173926	357.839	-0.468205	0.079171	-5.91385	3.34203e-09	1.17512e-07	MARCHF3	115123	8.34716	8.34459	8.22596	9.07607	8.96504	8.96865	8.2963	8.37133	8.50536	9.19352	8.89851	9.42174	7.21724	7.03762	7.19347	8.99228	8.93656	9.01976	9.68109	9.58772	9.67825	7.4681	7.61728	7.52633	8.52889	8.57992	8.40654	8.67428	8.44993	8.50092	MARCHF3	115123	-0.670651	0.0220398	-0.306997	0.256636	-0.549609	0.0527613	-0.502161	0.0732077	0.0740068
ENSG00000101265	408.092	0.366646	0.061995	5.91412	3.33656e-09	1.17512e-07	RASSF2	9770	9.68715	9.00069	9.16511	8.9096	8.86348	8.95794	8.90067	8.77247	8.77123	9.14458	9.07124	8.88442	9.25313	9.29398	9.1515	8.66721	8.70117	8.78072	8.88654	8.73696	8.76273	8.82539	8.62681	8.85814	7.96304	8.52688	8.39549	8.51252	8.22259	8.13314	RASSF2	9770	0.117011	0.9999	0.685239	0.0452026	0.51825	0.145639	0.26938	0.72756	0.441143
ENSG00000143252	2760.37	-0.142061	0.024024	-5.91331	3.35303e-09	1.177e-07	SDHC	6391	11.446	11.5467	11.5694	11.7408	11.7442	11.7	11.4244	11.4418	11.429	11.2631	11.1886	11.2603	11.1883	11.1966	11.0949	11.4621	11.4609	11.4923	11.4378	11.4287	11.4036	11.3525	11.3459	11.2487	11.6344	11.5037	11.6205	11.5177	11.6104	11.7366	SDHC	6391	-0.0357992	0.9999	-0.0111112	0.97809	-0.155947	0.133476	-0.190808	0.107352	-0.119587
ENSG00000159733	465.844	-0.262552	0.0444178	-5.91096	3.40129e-09	1.19194e-07	ZFYVE28	57732	8.70047	8.88643	8.59507	9.05799	8.89385	8.99682	8.95714	9.12828	9.02215	9.1144	9.01594	8.93402	8.70597	8.64965	8.53996	9.11331	9.3884	9.23699	9.296	9.41094	9.4498	8.5226	8.70589	8.87356	9.30659	9.02796	8.99276	9.03092	9.31945	9.22393	ZFYVE28	57732	-0.228181	0.98067	-0.489835	0.0910175	-0.0838099	0.848742	-0.402053	0.192439	-0.298289
ENSG00000162817	41.3715	0.690591	0.116896	5.90772	3.46881e-09	1.21356e-07	C1orf115	79762	6.48717	6.60446	6.39352	5.91499	5.82947	5.9296	5.50884	5.99109	5.88848	6.59559	6.39935	6.40093	7.26451	7.37253	7.17568	5.59391	5.92851	6.11647	6.19815	6.21075	6.04657	6.848	6.77648	6.87311	6.3573	6.75283	6.47675	6.88505	6.43486	6.34898	C1orf115	79762	-0.176671	0.9999	0.852925	0.528211	0.686094	0.396613	0.669854		0.635557
ENSG00000164885	1588.75	-0.27288	0.0461965	-5.90695	3.48498e-09	1.21718e-07	CDK5	1020	10.4764	10.5843	10.4495	10.8061	10.7311	10.7732	10.7262	10.8413	10.7813	10.7985	10.71	10.6431	10.4284	10.2949	10.4661	10.7791	11.0034	10.9547	10.9884	10.862	10.9028	10.6665	11.0079	10.8134	10.6375	10.3782	10.0286	10.4192	10.59	10.4542	CDK5	1020	-0.129663	0.992508	-0.141084	0.760539	-0.451268	0.00095369	-0.207838	0.380533	-0.290391
ENSG00000188848	327.938	-0.464589	0.0786669	-5.90577	3.50995e-09	1.22385e-07	BEND4	389206	9.03307	8.88147	9.09189	9.44264	9.52041	9.65393	8.20546	8.09085	8.26356	8.032	8.12607	8.00584	8.6293	8.50488	8.36869	8.54181	8.43897	8.53445	8.56087	8.33749	8.31644	9.18003	8.89628	8.87739	7.65342	7.8724	7.12862	7.72933	8.10441	7.88042	BEND4	389206	-0.376266	0.364715	-0.0999804	0.926652	-0.549498	0.000593963	-0.432419	0.0657938	-0.360997
ENSG00000140939	1126.93	-0.358475	0.0607985	-5.89611	3.72181e-09	1.29555e-07	NOL3	8996	9.77438	9.96656	9.67868	10.2092	10.2954	10.2923	10.4795	10.519	10.2534	10.3113	10.3795	10.2051	9.2071	9.40834	9.5292	10.7824	11.0793	10.8104	10.4401	10.2662	10.3951	9.78908	9.90451	9.84876	10.3225	10.1413	9.67903	10.1458	10.3348	10.0931	NOL3	8996	-0.487614	0.238903	-0.254523	0.545053	-0.492621	0.0446089	-0.0734143	0.943252	-0.263942
ENSG00000130589	710.853	0.898414	0.152526	5.89024	3.85629e-09	1.34012e-07	HELZ2	85441	10.0806	10.0918	9.86834	9.33053	9.05987	9.33119	9.64723	9.65348	9.40118	9.29862	9.33102	9.09883	10.5307	10.29	9.81706	9.44474	9.44459	9.34015	8.18728	8.28772	8.4923	8.40961	8.41584	8.50357	9.86779	9.88802	10.859	9.73545	9.59734	9.83475	HELZ2	85441	0.178462	0.9999	0.607375	0.0494013	1.97927	1.33882e-20	1.046	5.45977e-05	0.49637
ENSG00000164176	10614.5	-0.192479	0.0326897	-5.88805	3.90788e-09	1.35579e-07	EDIL3	10085	13.8566	13.8803	14.0291	14.1696	14.2665	14.096	13.817	13.7649	13.9241	12.5032	12.5767	12.3858	12.5842	12.546	12.5358	14.0614	13.9202	14.0401	12.8122	12.7395	12.5955	12.879	12.6581	12.6872	12.9865	12.9228	12.9679	12.8639	12.9706	13.1382	EDIL3	10085	-0.167505	0.992508	-0.269045	0.26197	-0.187654	0.477342	-0.231429	0.507795	-0.119558
ENSG00000116691	772.04	-0.283555	0.0482097	-5.8817	4.06066e-09	1.40646e-07	MIIP	60672	9.70669	9.85229	9.60638	10.0473	9.98378	9.92471	9.69588	9.916	9.76032	9.60848	9.4504	9.36571	9.6325	9.49064	9.61431	10.0157	10.2593	10.0177	9.66969	9.48491	9.61919	9.68618	10.0519	9.87574	9.48404	9.1329	8.96418	9.21138	9.51635	9.27544	MIIP	60672	-0.320816	0.793072	0.0289259	0.977939	-0.316509	0.262928	-0.125095	0.876144	-0.356501
ENSG00000133460	1574.71	0.359295	0.0610998	5.88046	4.09139e-09	1.41475e-07	SLC2A11	66035	10.6607	10.6366	10.5347	10.2052	10.0772	10.3465	10.8354	10.7755	10.5	10.503	10.6584	10.6555	11.3441	11.3715	11.2527	10.6436	10.7545	10.2673	9.84969	10.1406	10.4384	10.7021	10.8669	10.7944	10.6747	10.9193	10.8467	10.6357	10.5849	10.4875	SLC2A11	66035	0.150347	0.9999	0.374007	0.158741	0.551901	0.123955	0.462309	0.364783	0.224266
ENSG00000197170	2572.82	-0.192837	0.0328238	-5.87491	4.23081e-09	1.46054e-07	PSMD12	5718	11.1947	11.1896	11.2957	11.3516	11.4159	11.3508	11.3632	11.365	11.3782	11.1045	11.0084	11.1652	11.028	11.0289	10.9578	11.4642	11.4211	11.4992	11.2819	11.3467	11.3255	11.2938	11.3256	11.1488	11.6909	11.627	11.3499	11.6779	11.8319	11.8166	PSMD12	5718	-0.0900548	0.9999	-0.0583053	0.839415	-0.255933	0.0468006	-0.230607	0.164266	-0.228092
ENSG00000070366	1033.48	0.218673	0.0372234	5.87462	4.23826e-09	1.46069e-07	SMG6	23293	10.2015	10.0746	10.1694	9.69707	9.87086	9.77655	10.1226	10.0536	10.1091	9.9681	9.91759	9.94053	10.1914	10.193	10.1551	9.98728	9.92748	9.98379	9.8087	9.77105	9.79759	9.99577	9.6842	9.93559	10.3366	10.4676	10.6142	10.4555	10.3985	10.4658	SMG6	23293	0.13953	0.880079	0.269909	0.520316	0.323417	0.00127244	0.158325	0.392219	0.113011
ENSG00000133874	201.592	0.474077	0.0807072	5.87404	4.25309e-09	1.46338e-07	RNF122	79845	8.45735	8.35901	8.51799	8.34862	7.9733	8.26086	8.195	8.03405	8.12107	8.08878	7.94874	7.81392	8.59684	8.60616	8.36109	8.00701	8.33729	8.16865	7.53135	7.57866	7.54942	7.82863	7.76563	7.83725	7.13758	7.49999	7.55465	7.44208	6.96418	6.98657	RNF122	79845	-0.068894	0.9999	0.731795	0.196722	0.878372	5.65384e-07	0.524268	0.0517331	0.677608
ENSG00000187688	1687.57	-0.290305	0.0495048	-5.86417	4.51385e-09	1.55055e-07	TRPV2	51393	10.7346	10.9915	10.7553	11.2471	11.285	11.211	10.6916	10.7877	10.755	11.0366	11.0684	10.8685	10.0916	10.1246	10.2327	10.9849	11.1643	11.1373	11.3279	11.0334	11.1238	10.2861	10.4451	10.4823	10.4382	10.2383	9.83702	10.3181	10.417	10.2075	TRPV2	51393	-0.356755	0.0781661	-0.101598	0.782121	-0.265667	0.0989159	-0.179599	0.486029	-0.223501
ENSG00000166573	55.6082	-0.825249	0.140827	-5.86001	4.62849e-09	1.58731e-07	GALR1	2587	7.64808	7.39986	7.42946	8.07777	8.39555	8.15794	6.14893	6.18251	6.32817	5.99538	5.32782	5.76785	5.5887	5.71753	5.72504	6.4879	5.97479	6.7537	5.94519	6.01576	5.95425	6.20027	5.96008	6.13656	6.12636	6.06228	6.04298	5.83586	6.26175	6.56124	GALR1	2587	-0.45138	0.97092	0.0842163	0.964663	-1.22323	0.0128189	-0.605045	0.602109	-0.81697
ENSG00000100934	2997.41	-0.163786	0.0279617	-5.85751	4.6987e-09	1.60874e-07	SEC23A	10484	11.5148	11.4531	11.6893	11.775	11.7863	11.6978	11.5878	11.4859	11.5731	11.6181	11.4501	11.5524	11.2419	11.3194	11.3248	11.6345	11.6369	11.7499	11.7511	11.7672	11.7286	11.6142	11.4233	11.4447	11.5601	11.475	11.4888	11.5464	11.5769	11.6289	SEC23A	10484	-0.122782	0.984879	-0.0598243	0.874521	-0.201544	0.206704	-0.212075	0.292442	-0.0902182
ENSG00000166165	7072.95	-0.298933	0.0510758	-5.85274	4.83546e-09	1.65285e-07	CKB	1152	13.2048	13.0381	12.8601	13.2327	13.1146	13.168	12.8377	13.0527	13.0885	12.6996	12.5229	12.6742	12.186	11.9524	11.8633	13.1517	13.3695	13.3468	13.1134	12.8389	13.0588	12.1206	12.5462	12.3371	12.7539	12.3868	12.1109	12.4104	12.6246	12.5711	CKB	1152	-0.292277	0.849261	-0.219438	0.523489	-0.339226	0.205529	-0.378639	0.236279	-0.348839
ENSG00000225110	186.796	-0.46056	0.0787245	-5.85027	4.90764e-09	1.67478e-07	PNMA6F	105373377	7.05258	7.34166	7.05121	7.64706	7.66229	7.58435	7.33914	7.47066	7.46373	8.70086	8.78722	8.71971	7.69843	8.17051	8.28675	7.64228	8.02398	7.73422	9.04526	8.99252	9.01324	8.28687	8.34768	8.3952	5.84327	5.59909	5.60636	5.5808	5.8562	5.67304	PNMA6F	105373377	-0.508595	0.995692	-0.953982	0.00067596	-0.324693	0.746483	-0.318729	0.873796	-0.698381
ENSG00000114853	1492.93	-0.207441	0.0354787	-5.84692	5.00753e-09	1.70608e-07	ZBTB47	92999	10.3526	10.4336	10.2683	10.3768	10.5158	10.5663	10.5278	10.3954	10.4067	10.7569	10.6614	10.7285	10.5818	10.5156	10.6337	10.4502	10.4161	10.5211	11.0534	10.9844	11.0894	10.8189	10.7084	10.9209	10.6042	10.3637	10.2216	10.4008	10.5946	10.539	ZBTB47	92999	-0.0159731	0.9999	0.0722976	0.863121	-0.246053	0.0698064	-0.337877	0.0144279	-0.261781
ENSG00000085982	617.807	0.285052	0.0487684	5.84501	5.06528e-09	1.72294e-07	USP40	55230	9.23906	9.0851	9.08746	8.70966	8.70113	8.85395	9.49057	9.46576	9.38752	9.40766	9.22131	9.45885	9.84257	9.94881	9.85923	9.2314	9.37485	9.06685	8.98663	9.20935	9.20647	9.53924	9.54995	9.51528	9.45295	9.56682	9.87606	9.50083	9.43759	9.59824	USP40	55230	0.241436	0.792681	0.00392866	0.995635	0.377305	0.02452	0.251179	0.36262	0.165455
ENSG00000118369	1918.3	-0.221422	0.0379	-5.84226	5.14969e-09	1.7488e-07	USP35	57558	10.6932	10.6871	10.6515	10.7398	10.8069	10.7142	10.8552	10.9602	10.8857	11.0428	10.9434	10.9307	10.4777	10.4809	10.5972	10.8888	10.9723	11.0026	11.3207	11.2869	11.2881	10.6958	10.6926	10.8787	11.4374	11.1423	10.8904	11.0403	11.3778	11.3296	USP35	57558	-0.0498345	0.9999	-0.371206	0.0125944	-0.244542	0.095544	-0.335064	0.0234511	-0.365572
ENSG00000148908	583.597	0.362442	0.0620498	5.84116	5.18394e-09	1.75757e-07	RGS10	6001	9.05941	9.37338	9.30885	8.9346	8.91092	8.86928	8.60292	8.4902	8.67864	9.65808	9.83763	9.79419	9.15349	9.2664	9.52075	8.14527	8.48405	8.47265	9.50942	9.11114	9.18624	8.97042	8.9583	9.07369	9.90834	9.93641	10.3196	9.85002	9.67122	9.75385	RGS10	6001	0.260809	0.9999	0.036808	0.980545	0.357046	0.46421	0.523692	0.342119	0.278101
ENSG00000029993	3762.58	-0.185193	0.0317188	-5.83858	5.26472e-09	1.78206e-07	HMGB3	3149	11.9434	11.9806	12.0122	12.1873	12.1932	12.1514	12.2282	12.1888	12.1561	11.3795	11.3561	11.2636	11.7202	11.6813	11.6851	12.3028	12.2464	12.3093	11.6197	11.4672	11.4339	11.9756	11.9815	11.7977	11.8634	11.8163	11.4749	11.7705	11.9528	11.9116	HMGB3	3149	-0.0915625	0.9999	-0.118362	0.680497	-0.225424	0.266391	-0.180508	0.589947	-0.219856
ENSG00000067057	8388.86	-0.268305	0.0459724	-5.83623	5.3396e-09	1.80447e-07	PFKP	5214	12.913	12.9666	12.8607	13.2509	13.1818	13.2394	13.2193	13.2654	13.1334	13.1363	13.0782	13.0456	12.8906	12.8098	12.8913	13.3198	13.592	13.4418	13.3847	13.1639	13.2643	13.0641	13.1843	13.2313	12.6305	12.4198	11.8826	12.5357	12.6441	12.5083	PFKP	5214	-0.244835	0.319053	-0.161999	0.210132	-0.296044	0.0169192	-0.189201	0.310636	-0.293072
ENSG00000102900	2729.09	-0.266902	0.0457449	-5.83457	5.39288e-09	1.81953e-07	NUP93	9688	11.1009	11.087	11.0859	11.223	11.2883	11.2783	11.3005	11.1665	11.2456	11.3374	11.1634	11.27	11.385	11.4138	11.4452	11.2928	11.3538	11.3881	11.6662	11.5807	11.5008	11.7436	11.7913	11.71	11.6521	11.5717	11.1336	11.6734	11.9419	11.8974	NUP93	9688	-0.104567	0.9999	-0.259663	0.181282	-0.336872	0.178578	-0.333665	0.304872	-0.364841
ENSG00000179091	2787.82	-0.287701	0.049315	-5.83395	5.41315e-09	1.82048e-07	CYC1	1537	11.2143	11.1314	11.0226	11.2873	11.2183	11.3017	11.1953	11.4441	11.3911	11.7305	11.6565	11.6282	11.1366	11.0248	11.3165	11.5082	11.6524	11.5742	12.0274	11.8197	11.8739	11.4288	11.6655	11.7217	11.7021	11.3183	10.9656	11.4406	11.5834	11.5016	CYC1	1537	-0.230104	0.459291	-0.167392	0.62697	-0.453318	6.04166e-05	-0.242523	0.141243	-0.351768
ENSG00000050748	4720.16	-0.209099	0.0358409	-5.83408	5.40868e-09	1.82048e-07	MAPK9	5601	12.1782	12.2812	12.3302	12.591	12.6457	12.5197	12.2288	12.1354	12.1261	12.2101	12.2125	12.172	12.1374	12.1463	12.1019	12.2935	12.2524	12.3539	12.4432	12.3555	12.3001	12.507	12.3958	12.3696	11.8347	11.7997	11.4882	11.8936	11.8768	11.8354	MAPK9	5601	-0.13342	0.98067	-0.2696	0.0150836	-0.296843	0.043592	-0.172654	0.504134	-0.115189
ENSG00000185420	1211.46	-0.323293	0.0554352	-5.83191	5.47958e-09	1.83985e-07	SMYD3	64754	9.60623	9.97356	9.95091	10.2052	10.1399	10.2181	10.0265	10.1977	10.1561	10.5686	10.6418	10.725	9.89667	9.85812	10.1286	10.3255	10.4045	10.3225	11.0302	10.7789	10.9527	10.4683	10.4397	10.4143	10.2584	10.0375	9.61181	10.2647	10.2679	10.1705	SMYD3	64754	-0.22812	0.994683	-0.23985	0.466094	-0.495011	0.0822622	-0.288479	0.578672	-0.249797
ENSG00000184459	5.90242	2.92677	0.502149	5.82849	5.59311e-09	1.87495e-07	BPIFC	254240	5.17634	5.42624	5.32583	4.83516	5.15519	4.83516	5.22645	4.83516	4.83516	5.6928	5.18437	6.06312	6.40833	6.45307	5.98089	4.83516	4.83516	4.83516	5.31798	5.64895	5.52058	4.83516	5.14289	5.13558	5.02285	5.3287	5.36241	5.37967	4.83516	4.83516	BPIFC	254240	1.12222		1.94042		5.20584		0.837035		4.58324
ENSG00000155252	1495.02	-0.163155	0.0280039	-5.82615	5.67203e-09	1.89835e-07	PI4K2A	55361	10.4369	10.3837	10.3988	10.6569	10.6524	10.6438	10.4986	10.6165	10.5726	10.5955	10.4932	10.5177	10.2331	10.2831	10.2984	10.6533	10.7906	10.7867	10.7831	10.7532	10.6726	10.4049	10.3416	10.4261	10.8653	10.7556	10.6796	10.8203	10.8853	10.7449	PI4K2A	55361	-0.179656	0.440842	-0.00126033	0.99835	-0.121877	0.317012	-0.208943	0.0795927	-0.086085
ENSG00000188958	2031.08	0.386512	0.0663669	5.82386	5.75031e-09	1.92122e-07	UTS2B	257313	9.28811	9.41855	9.51058	8.86347	8.84139	8.8578	9.60474	9.64277	9.43146	10.9727	10.8971	10.808	10.7799	11.0106	11.3282	9.38195	9.20145	9.43999	10.3573	10.3338	10.2431	10.9292	10.7914	10.7964	12.366	12.6046	12.1898	12.871	12.3587	12.1791	UTS2B	257313	0.241051	0.9999	0.568137	0.0771684	0.226658	0.710509	0.602314	0.261597	0.27964
ENSG00000140450	1689.77	0.378719	0.0650315	5.82362	5.75877e-09	1.92122e-07	ARRDC4	91947	10.7195	10.4587	10.5841	9.86214	9.90313	9.91921	10.6198	10.5622	10.5437	11.419	11.2306	11.4242	10.8851	10.8215	10.9383	10.2413	10.0581	10.1824	11.2002	11.286	11.1532	10.7454	10.4234	10.534	10.8428	10.8019	11.4493	10.8089	10.6241	10.8504	ARRDC4	91947	0.435637	0.53138	0.395424	0.0994329	0.322846	0.309783	0.148431	0.852082	0.277412
ENSG00000111181	46.8981	0.685334	0.117702	5.82263	5.7929e-09	1.92843e-07	SLC6A12	6539	6.74458	6.68084	6.75327	6.429	6.49805	6.46756	6.33647	6.63579	6.45191	7.13858	6.78396	6.91062	6.98091	6.80277	6.66778	6.3608	6.40974	6.50878	6.43266	6.64753	6.83226	6.09474	6.3115	5.8563	6.34267	6.57816	6.5607	6.75513	6.13644	6.28034	SLC6A12	6539	0.12077	0.9999	0.212975	0.832233	1.43357	0.0211639	0.51685	0.715213	0.750625
ENSG00000143393	2034.97	0.165491	0.0284228	5.82246	5.79888e-09	1.92843e-07	PI4KB	5298	11.0095	11.1603	11.1285	10.9265	10.8886	10.8513	10.9752	11.0141	10.959	11.1415	11.1687	11.2628	11.201	11.1597	11.0898	10.9	10.9496	10.8619	11.0501	11.0183	10.9904	10.8408	10.8629	10.9329	11.0933	11.0284	11.1831	11.125	11.0151	10.9862	PI4KB	5298	0.0857778	0.992508	0.213529	0.34797	0.282045	0.00133887	0.175116	0.173235	0.078768
ENSG00000173486	1585.7	-0.292469	0.0502399	-5.82144	5.83425e-09	1.9371e-07	FKBP2	2286	10.4909	10.5904	10.5873	10.8875	10.7944	10.8599	10.4965	10.5917	10.7403	10.7493	10.6524	10.6282	10.4133	10.3707	10.4966	10.8281	11.0467	10.8458	10.849	10.7777	10.909	10.5653	11.1521	10.9789	10.6727	10.3732	10.3152	10.3874	10.4763	10.4238	FKBP2	2286	-0.301077	0.403655	-0.157705	0.801064	-0.50662	0.000553237	-0.175494	0.58393	-0.180269
ENSG00000100311	511.249	-0.333839	0.0573806	-5.81798	5.95626e-09	1.97447e-07	PDGFB	5155	9.05069	9.16073	9.12249	9.37132	9.54789	9.30612	9.11434	9.13212	8.90218	9.20946	8.95843	8.70071	9.38126	9.27829	9.13607	9.31018	9.6069	9.62414	9.2276	9.18638	9.13227	9.37871	9.61624	9.4679	8.65089	8.40933	8.2649	8.4759	8.87016	8.53729	PDGFB	5155	-0.507017	0.216043	-0.180177	0.585699	-0.239291	0.446402	-0.235834	0.644314	-0.360136
ENSG00000171574	369.115	-0.248096	0.0427076	-5.80918	6.27797e-09	2.07781e-07	ZNF584	201514	8.75529	8.64401	8.5888	9.11155	8.91938	8.91799	8.40902	8.39719	8.447	8.95317	8.85713	8.75236	8.39175	8.41401	8.45333	8.77805	8.83117	8.69327	8.88654	8.824	9.01324	8.63259	8.45414	8.62724	8.89791	8.72487	8.56642	8.70846	8.88753	8.90473	ZNF584	201514	-0.403537	0.0373157	0.0232571	0.980616	-0.176511	0.322783	-0.0603226	0.915807	-0.261826
ENSG00000197608	321.154	0.421562	0.0725855	5.8078	6.32997e-09	2.0917e-07	ZNF841	284371	8.33277	8.52147	8.53765	7.77624	8.1719	8.22538	8.57907	8.77247	8.66734	8.55327	8.7817	8.94615	8.70597	8.87556	8.77215	8.5933	8.49667	8.46562	8.13805	8.58679	8.45203	8.34633	8.34185	8.38443	8.26774	8.7823	9.19819	8.58959	8.47319	8.54647	ZNF841	284371	0.187002	0.98067	0.264993	0.683851	0.501018	0.00639612	0.419734	0.0803775	0.50616
ENSG00000154654	3561.17	0.386412	0.0665528	5.80609	6.39468e-09	2.10811e-07	NCAM2	4685	12.3874	12.404	12.5365	12.0942	12.2062	12.0558	11.7734	11.7327	11.7784	11.7387	11.658	11.5856	12.6511	12.5583	12.187	11.5168	11.2098	11.523	11.3611	11.3083	11.0872	12.4058	12.107	12.0194	10.5898	10.9497	11.5983	10.8131	10.5114	10.7722	NCAM2	4685	0.348959	0.9999	0.240992	0.520316	0.298078	0.692398	0.411966	0.705808	0.542295
ENSG00000172731	1089.47	-0.235432	0.0405502	-5.80594	6.40063e-09	2.10811e-07	LRRC20	55222	10.1797	10.1972	10.1547	10.4955	10.4417	10.5343	10.4773	10.4835	10.6142	9.86932	9.80544	9.75114	9.66547	9.68012	9.94003	10.6067	10.6905	10.6669	10.0387	10.0226	9.93952	9.98136	9.98659	10.1096	9.99817	9.78845	9.61063	9.98512	10.1305	9.94696	LRRC20	55222	-0.128125	0.9999	-0.115517	0.781455	-0.272717	0.193338	-0.204737	0.562641	-0.240002
ENSG00000104064	1295.15	0.178849	0.0308058	5.8057	6.40995e-09	2.10811e-07	GABPB1	2553	10.7373	10.8818	10.7385	10.6674	10.6812	10.6865	10.4965	10.6152	10.6201	10.379	10.3813	10.2432	10.6181	10.5641	10.5026	10.5246	10.4617	10.4342	10.1979	10.0118	10.0797	10.2977	10.2534	10.471	9.86067	10.0873	9.94545	10.0348	9.87842	9.78197	GABPB1	2553	0.113606	0.9999	0.399031	0.0924161	0.230754	0.349369	0.247453	0.467487	0.190781
ENSG00000196998	936.589	0.233931	0.0403215	5.80163	6.56728e-09	2.15645e-07	WDR45	11152	10.006	9.8699	9.89386	9.64665	9.65287	9.74582	9.66614	9.80758	9.84016	10.1224	10.3105	10.1363	10.1434	9.99869	10.1724	9.73459	9.78636	9.6583	9.99832	9.83635	9.85247	9.71634	9.83407	10.0278	10.1256	10.2177	10.3405	10.2253	9.93381	9.93588	WDR45	11152	0.0562591	0.9999	0.227527	0.506373	0.257317	0.058878	0.307769	0.0428674	0.2696
ENSG00000047849	14618.1	-0.128406	0.0221689	-5.79217	6.94826e-09	2.27796e-07	MAP4	4134	13.6896	13.6599	13.7109	13.9328	13.9313	13.8396	13.7897	13.7142	13.775	13.7741	13.7975	13.7458	13.5258	13.5054	13.6219	13.8769	13.8804	13.8788	13.9203	13.7936	13.758	13.7639	13.7432	13.6952	14.1104	14.0445	14.0397	14.1102	14.1579	14.1448	MAP4	4134	-0.114385	0.984879	-0.0354409	0.784374	-0.179941	0.23774	-0.0547439	0.913588	-0.0764114
ENSG00000185736	465.302	-0.413291	0.0713591	-5.79171	6.96745e-09	2.28066e-07	ADARB2	105	10.1331	10.094	9.91146	10.3895	10.4001	10.4441	7.93012	7.88572	8.01741	8.55327	8.05411	8.40419	9.33744	9.18032	8.74036	8.00701	8.06715	7.95305	8.81051	8.90136	8.80588	9.60252	9.44575	9.34353	6.85617	6.61359	6.74119	6.48887	6.90791	7.13343	ADARB2	105	-0.0767307	0.9999	-0.449035	0.113453	-0.39022	0.0642324	-0.560414	0.0161183	-0.60687
ENSG00000169618	71.5369	0.834216	0.144067	5.79049	7.01812e-09	2.29365e-07	PROKR1	10887	6.23097	6.23732	6.36072	5.91499	5.72789	6.21826	5.77961	6.03242	5.7221	7.37908	7.23692	7.65294	6.67969	6.74279	6.91961	5.59391	5.87978	5.97847	6.9233	7.04143	6.97876	6.29626	6.03368	6.25198	7.33879	8.11518	7.60178	8.64478	7.39111	7.43941	PROKR1	10887	0.0870661	0.9999	0.390206	0.413093	1.14253	0.45411	0.668425	0.844961	1.0367
ENSG00000125845	208.161	0.389873	0.0673363	5.78994	7.04129e-09	2.29762e-07	BMP2	650	8.913	8.74596	8.84143	8.6322	8.74467	8.61558	8.61859	8.44136	8.84823	7.11056	7.3178	7.14902	8.15609	7.97801	7.80285	8.31492	8.05004	8.35569	6.81755	6.31249	6.74031	7.51573	7.62703	7.79687	7.28662	7.49407	7.53943	7.55032	7.33812	7.36278	BMP2	650	0.475549	0.962613	0.141394	0.955852	0.43473	0.49479	0.896295	0.185719	0.274103
ENSG00000162522	2981.21	-0.176934	0.030569	-5.78802	7.12228e-09	2.32041e-07	KIAA1522	57648	11.409	11.5412	11.4506	11.6669	11.6378	11.6227	11.795	11.7974	11.7914	11.3725	11.4362	11.3389	11.265	11.2879	11.398	11.9446	11.9149	11.8706	11.6226	11.4489	11.5227	11.4955	11.3731	11.4765	11.6498	11.4738	11.2298	11.4642	11.7587	11.6182	KIAA1522	57648	-0.112914	0.9999	-0.277271	0.0635752	-0.13062	0.529426	-0.154838	0.601527	-0.291083
ENSG00000177542	2185.48	-0.186486	0.03224	-5.78429	7.2819e-09	2.36872e-07	SLC25A22	79751	11.2442	11.2271	11.1188	11.358	11.3896	11.3677	10.9661	11.234	11.0646	11.1155	11.1205	11.0307	11.1629	11.1201	11.087	11.1333	11.3083	11.1073	11.3379	11.1952	11.3273	11.3692	11.4123	11.3728	10.854	10.6199	10.4801	10.7105	10.7899	10.7094	SLC25A22	79751	-0.0894324	0.9999	-0.126023	0.701092	-0.264228	0.0850329	-0.205237	0.36262	-0.188082
ENSG00000100664	7375.68	0.131886	0.0228049	5.78323	7.32784e-09	2.37995e-07	EIF5	1983	12.847	12.8499	12.9264	12.8753	12.8729	12.82	12.8796	12.8189	12.8619	12.9488	12.9612	12.924	12.8223	12.8363	12.7907	12.8057	12.729	12.777	12.8128	12.7926	12.7564	12.6168	12.6041	12.5297	12.9813	13.1136	13.0244	13.1711	12.9269	12.9309	EIF5	1983	0.0876557	0.883865	0.118724	0.460838	0.237905	0.000190319	0.156806	0.0626757	0.155653
ENSG00000137285	36381.3	0.377046	0.0652095	5.78207	7.37877e-09	2.39276e-07	TUBB2B	347733	15.909	15.8715	15.7389	15.465	15.369	15.2897	15.3392	15.5165	15.5012	14.8576	14.9631	14.7103	15.9264	15.5958	15.4353	15.1894	15.3421	15.3297	14.6228	14.24	14.2528	14.9082	15.2933	15.1567	14.0647	14.4932	13.987	14.6111	14.3196	14.0197	TUBB2B	347733	0.170839	0.9999	0.43479	0.00227278	0.542867	0.0361924	0.464077	0.163369	0.247049
ENSG00000164949	59.2064	0.653092	0.113004	5.77939	7.49722e-09	2.4274e-07	GEM	2669	6.93805	7.29631	6.97286	6.57683	6.47278	6.46756	6.41955	6.63579	6.48087	7.15237	7.05885	7.32582	7.66994	7.31031	7.01401	6.12152	6.21436	6.23804	6.49165	7.04143	7.05561	6.80874	7.07112	7.11012	5.83516	6.17652	6.11796	6.22458	5.88542	5.99792	GEM	2669	0.687386	0.923354	1.33091	0.00105772	0.531005	0.446458	0.458908	0.718295	0.675232
ENSG00000171551	1202.17	-0.573567	0.0993882	-5.77097	7.88158e-09	2.54789e-07	ECEL1	9427	11.3375	11.3691	11.2519	11.8781	12.0154	11.9681	9.37116	9.60742	9.57395	9.1042	7.90838	8.47873	10.2957	9.97335	9.47771	9.77954	9.83413	10.067	8.93984	9.61088	9.07178	10.529	10.9261	10.5639	8.73888	8.46586	8.1543	8.51079	8.63689	8.61175	ECEL1	9427	-0.398867	0.98067	-0.328932	0.0491404	-0.761707	0.0868119	-0.740755	0.192378	-0.325112
ENSG00000143919	246.003	-0.353558	0.0612773	-5.7698	7.93672e-09	2.56174e-07	CAMKMT	79823	8.02718	7.9835	8.17647	8.4565	8.56194	8.60645	8.33488	8.20539	8.24842	7.62272	7.73419	7.59135	8.36742	8.1576	8.01769	8.44416	8.73878	8.38585	7.91216	7.74785	7.79754	8.53399	8.68767	8.32935	8.33249	8.08832	7.9533	8.27106	8.35391	8.29492	CAMKMT	79823	-0.316318	0.684903	-0.247156	0.770555	-0.395139	0.0528104	-0.227909	0.638717	-0.263699
ENSG00000236609	1522.38	-0.20456	0.0354671	-5.7676	8.04092e-09	2.59136e-07	ZNF853	54753	10.5904	10.6204	10.4852	10.8329	10.8171	10.8358	10.4251	10.5408	10.6215	10.6904	10.7085	10.6067	10.6769	10.6055	10.751	10.6677	10.8627	10.8619	10.9419	10.7917	10.8319	10.8812	10.8271	10.906	10.2461	10.079	9.91454	10.145	10.1816	10.0094	ZNF853	54753	-0.270887	0.292925	-0.184751	0.515814	-0.195876	0.202941	-0.195304	0.342402	-0.107886
ENSG00000113163	2543.79	-0.177519	0.0307824	-5.7669	8.07447e-09	2.59816e-07	CERT1	10087	11.129	11.1459	11.2686	11.3944	11.3828	11.3644	11.235	11.1591	11.1877	11.0613	10.8831	10.9845	11.1341	11.136	11.1397	11.435	11.2474	11.4863	11.2782	11.1827	11.1386	11.402	11.1864	11.3057	11.6571	11.6887	11.6979	11.6777	11.8754	11.8238	CERT1	10087	-0.199365	0.424659	-0.0914012	0.838377	-0.164369	0.183542	-0.229141	0.0851622	-0.105508
ENSG00000250565	500.064	0.319457	0.0555036	5.7556	8.63341e-09	2.77373e-07	ATP6V1E2	90423	9.10226	9.20108	8.98646	8.94939	8.73511	8.70809	9.53239	9.65081	9.51236	9.64643	9.78908	9.82292	8.49478	8.57104	8.54666	9.29787	9.52037	9.55987	9.31444	9.16696	9.37675	8.06053	7.94684	8.10464	8.93917	8.98938	8.84988	9.08442	8.80584	8.86061	ATP6V1E2	90423	0.11764	0.9999	0.740644	0.0771684	0.602975	0.0126945	0.502329	0.071722	0.119914
ENSG00000013293	1541.42	0.334189	0.0580827	5.75367	8.73259e-09	2.79837e-07	SLC7A14	57709	10.9581	10.8843	11.0238	10.7156	10.8854	10.7884	10.6159	10.3419	10.4631	10.7373	10.5861	10.7215	11.4203	11.3199	11.0214	10.3993	10.1701	10.2203	10.5326	10.5838	10.2835	10.9526	10.7668	10.7566	9.82684	10.2504	10.5557	10.2793	9.63024	9.92156	SLC7A14	57709	0.224979	0.9999	0.41154	0.208518	0.450466	0.368788	0.217179	0.865195	0.596133
ENSG00000205309	662.256	-0.309246	0.0537498	-5.75344	8.74439e-09	2.79837e-07	NT5M	56953	9.32111	9.47555	9.42206	9.78197	9.77415	9.78463	9.44311	9.70841	9.63591	9.42687	9.32724	9.31054	9.26066	9.12213	9.40237	9.6929	9.97983	10.0461	9.73951	9.44679	9.38032	9.589	9.57733	9.64423	9.32905	9.00643	8.70683	9.16139	9.14182	9.14783	NT5M	56953	-0.324588	0.350704	-0.289005	0.552295	-0.36354	0.0320492	-0.19075	0.56265	-0.265742
ENSG00000068028	652.621	0.26555	0.0461558	5.75333	8.75037e-09	2.79837e-07	RASSF1	11186	9.74499	9.75549	9.59708	9.51391	9.29235	9.42475	9.27091	9.55983	9.49971	9.7611	9.63884	9.5752	9.68657	9.7242	9.51905	9.27919	9.35429	9.317	9.3181	9.5701	9.54177	9.02375	9.34214	9.30714	9.24105	9.39491	9.39934	9.55217	9.31176	9.19455	RASSF1	11186	0.154135	0.98067	0.340646	0.348654	0.451474	0.00141212	0.192328	0.481695	0.216002
ENSG00000197081	6619.62	0.310462	0.0539935	5.74998	8.92551e-09	2.85001e-07	IGF2R	3482	12.6454	12.6375	12.5776	12.3293	12.3414	12.3122	12.4465	12.4772	12.5246	12.9009	12.8056	12.8868	12.6138	12.6415	12.7527	12.267	12.139	12.4385	12.8041	12.6921	12.616	12.2554	11.9716	12.3498	12.8659	13.2592	13.7487	13.2029	12.937	13.1986	IGF2R	3482	0.203436	0.992508	0.353338	0.149119	0.477991	0.0501903	0.158675	0.81373	0.413673
ENSG00000166348	349.505	0.581611	0.101174	5.7486	8.99855e-09	2.86894e-07	USP54	159195	8.84392	8.92071	8.84143	8.4565	8.55651	8.50687	8.27661	8.02574	8.05281	8.82222	8.73674	8.7338	9.51787	9.53917	9.24283	7.84512	7.94275	7.92233	8.43793	8.39231	8.30138	8.56762	8.48617	8.41119	8.52126	8.76475	9.61891	8.41914	8.19367	8.62047	USP54	159195	0.273854	0.98067	0.717513	0.0685784	1.07119	1.69665e-06	0.448195	0.236279	0.640479
ENSG00000175643	110.577	0.483885	0.0842054	5.74649	9.1116e-09	2.90055e-07	RMI2	116028	7.81434	7.92624	7.74813	7.44888	7.652	7.54598	6.95989	6.63579	6.66604	7.43585	7.18596	7.67287	8.0505	7.58345	7.78002	6.62427	6.34833	6.23804	7.22966	7.30025	6.95883	7.24474	7.34788	7.3569	7.25148	7.2641	7.44709	7.51226	7.04943	7.03918	RMI2	116028	0.600154	0.606547	-0.13125	0.928485	0.682069	0.00816027	0.401083	0.39724	0.425343
ENSG00000078804	4015.56	-0.279672	0.0486749	-5.74573	9.1527e-09	2.90835e-07	TP53INP2	58476	11.6762	11.7292	11.6922	12.1161	12.1275	12.0608	12.1187	12.1016	12.146	11.6828	11.6368	11.583	11.7304	11.5229	11.5882	12.5369	12.6347	12.5706	12.0676	11.7255	11.7961	11.5914	11.6315	11.6081	12.2176	12.1078	11.7647	12.1575	12.4035	12.2976	TP53INP2	58476	-0.459214	2.02929e-05	-0.231775	0.163253	0.00952242	0.973774	-0.241164	0.0960619	-0.293053
ENSG00000178585	2385.84	-0.187871	0.0326987	-5.74552	9.164e-09	2.90835e-07	CTNNBIP1	56998	11.4501	11.3637	11.4044	11.6376	11.6301	11.4826	11.3574	11.4318	11.4406	11.2843	11.2336	11.1721	11.1386	11.1052	11.0749	11.4265	11.6298	11.6245	11.5958	11.3302	11.4543	11.3037	11.2457	11.3627	10.6031	10.4683	10.2783	10.5407	10.6577	10.5143	CTNNBIP1	56998	-0.150261	0.98067	-0.082428	0.798264	-0.199934	0.276354	-0.239985	0.274835	-0.168383
ENSG00000099960	249.066	-0.364366	0.063428	-5.74456	9.21583e-09	2.92035e-07	SLC7A4	6545	7.95347	8.30045	8.17647	8.55677	8.59406	8.59265	7.86529	7.87648	7.67375	8.35443	8.16072	8.19531	8.66673	8.55151	8.4569	8.0887	8.22776	8.37085	8.36157	8.36516	8.3239	9.06738	9.1331	8.92257	7.37176	7.09983	7.35684	7.13921	7.22774	7.27704	SLC7A4	6545	-0.525829	0.81512	-0.343491	0.270166	-0.545732	0.219908	-0.133967	0.936055	-0.140509
ENSG00000156990	1055.93	-0.199615	0.0347535	-5.74375	9.26045e-09	2.93004e-07	RPUSD3	285367	10.0015	10.0035	10.0244	10.2575	10.0697	10.1494	10.0894	10.1226	10.1741	10.0214	9.88203	9.80973	10.1454	10.033	10.1051	10.238	10.2464	10.1566	10.2019	10.0377	10.1186	10.3241	10.5046	10.377	10.2377	9.94243	9.88492	10.0319	10.0999	10.0622	RPUSD3	285367	-0.0844038	0.9999	-0.20376	0.583554	-0.320605	0.00722556	-0.226389	0.202604	-0.1942
ENSG00000143367	906.372	0.218716	0.0380816	5.74334	9.28274e-09	2.93264e-07	TUFT1	7286	9.80836	9.95011	9.99874	9.69416	9.67546	9.69526	9.58501	9.51356	9.54963	10.2663	10.2951	10.2691	10.2244	10.2342	10.2368	9.60322	9.35083	9.46126	9.96374	9.97214	10.0797	9.88511	9.77727	9.86617	9.86854	10.0145	9.89956	10.0479	9.93348	9.93344	TUFT1	7286	0.0810062	0.9999	0.334506	0.273131	0.413512	0.000330056	0.283109	0.0657275	0.0786561
ENSG00000164185	10.2716	1.79597	0.312871	5.74029	9.45161e-09	2.97697e-07	ZNF474	133923	5.51287	5.84536	5.18295	5.32704	5.47137	5.2573	5.22645	5.63149	5.7813	5.99538	5.86344	6.26027	5.88937	5.64871	6.16133	5.14789	5.17199	5.18809	5.6639	5.77087	6.13099	5.29284	5.14289	5.13558	5.3951	5.91852	5.98965	6.22458	5.47159	5.28749	ZNF474	133923	2.41492		-0.111232		3.26053		0.475714		2.33276
ENSG00000026652	3602.14	0.202812	0.03533	5.74049	9.44039e-09	2.97697e-07	AGPAT4	56895	11.8655	11.9378	12.0052	11.8437	11.8789	11.8935	11.9525	11.9613	12.013	11.7216	11.8177	11.6942	11.6788	11.7329	11.736	11.951	11.8771	11.9353	11.5638	11.4696	11.4827	11.3857	11.2899	11.3455	11.8967	12.2561	12.0562	12.3119	12.0179	11.9449	AGPAT4	56895	0.0601563	0.992508	0.115147	0.552761	0.386089	3.60319e-12	0.241101	0.000373098	0.259283
ENSG00000011258	473.311	0.325108	0.0566421	5.73968	9.48558e-09	2.98316e-07	MBTD1	54799	9.5424	9.31943	9.33147	9.20483	9.21896	9.10426	9.24093	9.13594	9.20867	8.93792	8.64843	9.04346	9.32851	9.23828	9.2053	9.04856	8.92263	8.87906	8.65677	8.66662	8.63091	8.98704	8.59293	8.87356	8.74134	9.00235	9.39797	8.92657	8.83264	8.87886	MBTD1	54799	0.27479	0.992508	0.296052	0.632904	0.4846	0.176654	0.267364	0.72756	0.335034
ENSG00000048828	1702.53	-0.207375	0.0361326	-5.73929	9.50721e-09	2.98546e-07	FAM120A	23196	10.5859	10.552	10.4953	10.6554	10.6599	10.7057	10.8974	10.795	10.8084	10.7537	10.5199	10.6332	10.3121	10.3927	10.426	10.901	10.8615	10.8935	10.9942	10.8883	10.9764	10.8611	10.6287	10.7283	11.0414	10.8991	11.0179	10.887	11.1258	11.0744	FAM120A	23196	-0.0498112	0.9999	-0.267135	0.330853	-0.374879	1.67864e-05	-0.324308	0.00115871	-0.15381
ENSG00000172366	737.192	-0.262234	0.0457026	-5.73784	9.58903e-09	3.00663e-07	MCRIP2	84331	9.48211	9.53984	9.27424	9.64966	9.46381	9.61818	9.58501	9.62656	9.59787	9.82038	9.76974	9.84895	9.19339	9.25241	9.34028	9.64997	9.99539	9.78738	10.0888	10.0269	10.2391	9.43424	9.61143	9.60329	9.7384	9.38453	9.19977	9.40622	9.60281	9.40776	MCRIP2	84331	-0.223628	0.887952	-0.21736	0.719214	-0.311734	0.123093	-0.326735	0.178614	-0.280759
ENSG00000171860	11.8589	1.77182	0.308854	5.73676	9.6506e-09	3.02139e-07	C3AR1	719	5.17634	5.31889	5.32583	4.83516	4.83516	4.83516	4.83516	4.83516	4.83516	6.59559	6.29762	6.59542	5.65881	5.99566	6.55662	5.14789	4.83516	5.44346	5.78792	5.64895	5.52058	5.88942	5.4472	5.67454	5.4804	5.97586	6.04298	6.12195	5.23962	5.49786	C3AR1	719	-2.73785		-0.108154	0.964608	1.27334		2.1512		2.18158
ENSG00000171161	811.127	-0.228954	0.0399189	-5.73548	9.72345e-09	3.03964e-07	ZNF672	79894	9.97181	9.72264	9.70488	9.99133	10.0448	9.93018	9.78505	9.81713	9.90148	9.60126	9.51821	9.54101	9.54739	9.50588	9.48642	10.0601	10.002	10.0647	10.0164	9.77362	9.90285	9.64757	9.79645	9.76257	9.71572	9.34865	9.63942	9.44356	9.56799	9.56625	ZNF672	79894	-0.213868	0.791477	-0.0690601	0.911256	-0.237606	0.178033	-0.371883	0.0355019	-0.152993
ENSG00000181649	778.713	-0.355991	0.0621134	-5.73131	9.96569e-09	3.10789e-07	PHLDA2	7262	9.61216	9.81902	9.70199	9.93314	9.9326	9.87447	9.7885	9.916	9.91582	9.88527	9.75015	9.82947	9.3303	9.24637	9.37072	10.0728	10.3995	10.2036	10.2274	9.87988	10.042	9.60789	9.88074	9.91715	9.04701	8.60886	8.26186	8.90972	9.07252	8.79678	PHLDA2	7262	-0.369786	0.291554	-0.225293	0.677764	-0.528221	0.00216189	-0.248559	0.408105	-0.409321
ENSG00000197620	567.76	-0.241297	0.0421022	-5.73121	9.9716e-09	3.10789e-07	EOLA1	91966	9.20803	9.13596	9.06962	9.37132	9.2694	9.23407	9.18429	9.13212	9.3351	9.55462	9.50155	9.44753	8.94713	8.92182	8.96937	9.35843	9.52956	9.36295	9.67825	9.70534	9.77613	9.06738	9.23048	9.29003	9.29271	9.0958	8.75504	9.08327	9.25251	9.18463	EOLA1	91966	-0.212339	0.725108	-0.180738	0.699374	-0.27997	0.0561543	-0.236366	0.215381	-0.28645
ENSG00000175040	464.876	-0.364609	0.0636273	-5.73038	1.00203e-08	3.11842e-07	CHST2	9435	8.72265	8.6788	8.56984	8.92465	9.04836	8.97928	8.48807	8.84919	8.69542	9.1578	8.77059	9.10245	8.95645	8.71249	8.74328	8.96914	8.93656	8.98095	9.36483	9.32248	9.36241	9.41596	9.50658	9.43716	9.15408	9.0293	8.78173	9.17987	9.11556	9.01107	CHST2	9435	-0.308552	0.9999	-0.34568	0.363249	-0.712181	0.198376	-0.36501	0.768267	-0.0998733
ENSG00000081791	1302.15	0.25627	0.0447558	5.72597	1.02847e-08	3.19592e-07	DELE1	9812	10.6434	10.6145	10.4632	10.2436	10.1236	10.2062	10.6101	10.6288	10.6432	10.2009	10.3593	10.3758	10.2586	10.2782	10.3092	10.3906	10.2867	10.3813	10.0074	10.2312	10.1954	9.96472	9.96037	10.0449	10.6637	10.6739	11.0302	10.5438	10.5856	10.6552	DELE1	9812	0.289692	0.883865	0.156249	0.671366	0.31003	0.289865	0.172403	0.79165	0.126765
ENSG00000004478	6323.15	-0.273175	0.0477244	-5.72402	1.04035e-08	3.22802e-07	FKBP4	2288	12.4504	12.5619	12.5741	12.7846	12.7054	12.7498	12.5396	12.7493	12.7096	12.6292	12.5933	12.6006	12.1184	12.1461	12.4251	12.7191	12.7978	12.8486	12.8983	12.7725	12.7959	12.7149	12.8522	12.8274	12.701	12.4643	12.1759	12.6007	12.6747	12.6084	FKBP4	2288	-0.116	0.983359	-0.153334	0.498737	-0.56508	1.77964e-07	-0.218803	0.217509	-0.241764
ENSG00000246705	368.432	0.519499	0.0908533	5.718	1.07785e-08	3.33941e-07	H2AJ	55766	8.70047	8.836	8.6976	8.5438	8.4493	8.56462	7.96763	8.35162	8.17018	9.19031	8.85187	9.1204	8.88506	8.77828	8.64367	8.13832	8.35128	7.88029	8.48447	8.73167	8.67815	7.8655	8.05821	7.86874	9.15592	9.54695	9.2834	9.87354	8.80438	8.76416	H2AJ	55766	0.0544734	0.9999	0.789799	0.00326999	1.005	3.05343e-08	0.483768	0.0480419	0.733738
ENSG00000143390	954.61	0.287847	0.0504291	5.70796	1.14341e-08	3.53727e-07	RFX5	5993	9.87154	10.0395	10.0541	9.74298	9.79034	9.74789	10.041	10.1188	9.91819	9.80997	9.85083	9.84032	9.9935	9.97821	10.0463	9.86125	9.94362	9.85587	9.73405	9.3843	9.50307	9.59171	9.2768	9.69274	10.44	10.5102	10.7424	10.4103	10.2003	10.3559	RFX5	5993	0.154132	0.950178	0.144628	0.766421	0.510841	2.20641e-05	0.305042	0.0747444	0.229177
ENSG00000125741	1593.95	-0.171692	0.0300808	-5.70769	1.14519e-08	3.53752e-07	OPA3	80207	10.3841	10.4818	10.4953	10.5895	10.6599	10.5987	10.7441	10.6124	10.7173	10.2979	10.2717	10.1967	10.2596	10.1495	10.4114	10.8108	10.7983	10.82	10.4182	10.3917	10.3666	10.4415	10.4851	10.631	11.2652	11.1865	11.0476	11.2034	11.3188	11.3399	OPA3	80207	-0.118085	0.953915	-0.0344945	0.94433	-0.252219	0.0185461	-0.144194	0.452209	-0.167217
ENSG00000132286	1132	-0.188522	0.0330372	-5.70636	1.1542e-08	3.5601e-07	TIMM10B	26515	9.90091	9.85229	10.1248	10.0856	10.1896	10.1305	10.064	10.0271	10.1939	10.1687	10.1532	10.1573	9.78375	9.95251	10.0213	10.301	10.2939	10.3626	10.2733	10.2479	10.2586	10.2367	10.0869	9.9948	10.5963	10.4671	10.3311	10.4414	10.6551	10.6162	TIMM10B	26515	-0.228204	0.651962	-0.294096	0.213004	-0.193648	0.26323	-0.10661	0.783247	-0.219378
ENSG00000188916	518.529	0.421584	0.0738906	5.70551	1.15993e-08	3.57249e-07	INSYN2A	642938	9.26191	9.28981	9.23078	8.68627	8.90668	8.70382	8.4622	8.40995	8.30805	9.8813	9.58612	10.0734	9.87845	9.78926	9.71555	8.17952	7.88587	8.16865	9.20406	9.36057	9.29979	9.34691	8.92375	9.31562	8.95759	8.93981	9.14583	8.95084	9.03688	9.13939	INSYN2A	642938	0.379658	0.9999	0.612135	0.0169573	0.640119	0.453942	0.614164	0.651789	-0.0402343
ENSG00000124508	165.529	0.567976	0.0996232	5.70124	1.18938e-08	3.65779e-07	BTN2A2	10385	6.67289	6.57789	6.6004	6.60432	6.66143	6.61479	6.76493	6.74804	7.02635	8.75414	8.58001	8.59145	7.87311	7.9632	7.84195	6.70736	6.87481	6.53857	8.06963	8.17479	8.29379	7.18635	7.24907	7.31103	8.14119	8.45692	9.03237	8.53642	7.71694	8.20125	BTN2A2	10385	0.240404	0.9999	0.70525	0.180644	0.877028	0.223029	0.545149	0.691431	0.78206
ENSG00000068366	8282.51	-0.256728	0.045038	-5.70026	1.19625e-08	3.67348e-07	ACSL4	2182	12.8672	12.9765	13.0898	13.4708	13.487	13.3871	13.1659	13.0349	13.1647	12.6126	12.4781	12.5387	12.6763	12.6692	12.6831	13.4638	13.3523	13.4828	12.8854	12.7226	12.5634	13.025	12.7994	12.7668	13.0523	13.0871	12.7952	13.1563	13.2012	13.1676	ACSL4	2182	-0.308148	0.0195904	-0.197094	0.38813	-0.19024	0.126998	-0.188569	0.233512	-0.123046
ENSG00000147100	4790.68	-0.371439	0.0651916	-5.69765	1.21472e-08	3.72472e-07	SLC16A2	6567	12.1076	12.121	12.1583	12.5059	12.5335	12.5629	12.5589	12.6633	12.7746	11.4989	11.6115	11.2772	11.7522	11.7841	11.9324	12.8572	12.8528	12.9749	12.1636	11.7458	11.704	12.4051	12.228	12.3426	12.0673	12.0863	11.3709	12.1575	12.4317	12.0544	SLC16A2	6567	-0.224758	0.9999	-0.381951	0.150365	-0.505291	0.141362	-0.426128	0.381348	-0.28646
ENSG00000102606	5356.88	0.207083	0.0363601	5.69533	1.23133e-08	3.7701e-07	ARHGEF7	8874	12.6169	12.5978	12.6893	12.4723	12.471	12.4661	12.5457	12.4742	12.5339	12.2188	12.2155	12.163	12.7978	12.7443	12.5767	12.4402	12.3498	12.4794	12.1559	11.987	11.9536	12.3517	12.1671	12.2591	12.1703	12.3992	12.4175	12.3676	12.3054	12.2525	ARHGEF7	8874	0.0996621	0.98067	0.178482	0.462792	0.456021	5.52835e-08	0.164952	0.260155	0.148899
ENSG00000119778	397.369	0.339108	0.0595569	5.69385	1.24209e-08	3.79749e-07	ATAD2B	54454	8.913	8.90612	8.98646	8.70966	8.7636	8.77068	9.01148	8.82565	8.94017	8.48653	8.56721	8.46751	9.22068	9.21166	9.09104	8.69102	8.87522	8.85242	8.05199	8.45156	8.00813	8.87538	8.49144	8.77432	8.56177	9.13104	9.29897	9.0476	8.87296	8.90259	ATAD2B	54454	0.138905	0.9999	0.278249	0.70683	0.513071	0.0295337	0.380706	0.304065	0.416186
ENSG00000118971	6267.85	0.346087	0.0608095	5.69133	1.26057e-08	3.84835e-07	CCND2	894	12.0454	12.0681	12.1231	11.6147	11.597	11.6561	12.4388	12.2847	12.3014	12.3985	12.4794	12.3802	12.3972	12.429	12.6099	12.0124	11.9728	11.9911	11.8746	12.0138	11.8726	12.0286	12.1618	12.0707	13.2038	13.883	13.5559	13.7391	13.9372	13.8956	CCND2	894	0.360175	0.609026	0.460916	6.93966e-05	0.401512	0.100365	0.502786	0.0534908	0.0155487
ENSG00000197461	556.575	-0.266351	0.046806	-5.69052	1.26651e-08	3.86081e-07	PDGFA	5154	8.95103	9.08941	9.06061	9.35662	9.18432	9.10749	8.90067	9.09327	8.85322	8.62659	8.79272	8.81551	9.17757	9.30371	9.2325	9.01129	9.35429	9.09437	9.07153	8.90606	8.90342	9.61325	9.68191	9.68404	9.64067	9.49867	9.62127	9.50858	9.84796	9.67398	PDGFA	5154	-0.225136	0.997505	-0.53096	0.0130377	-0.454287	0.126152	-0.245615	0.701946	-0.198195
ENSG00000130054	623.175	-0.243355	0.042782	-5.68827	1.28334e-08	3.90422e-07	NALF2	27112	9.51732	9.48211	9.54967	9.8092	9.8109	9.85157	8.95714	9.04929	9.05713	9.32813	9.34603	9.19341	9.40524	9.45271	9.45481	8.91363	9.18213	9.317	9.55352	9.4371	9.59179	9.63972	9.48834	9.7667	9.29717	9.04852	9.00095	9.2835	9.36965	9.39921	NALF2	27112	-0.127287	0.9999	0.0139017	0.984323	-0.211275	0.280419	-0.261117	0.28557	-0.265206
ENSG00000154814	432.849	-0.23946	0.0420982	-5.68812	1.28449e-08	3.90422e-07	OXNAD1	92106	8.60813	8.48912	8.78781	8.61371	8.94447	8.79095	8.86174	8.88606	8.99534	8.99797	8.9036	8.89281	8.56056	8.5807	8.65302	9.02257	9.08139	9.11691	9.34345	9.21692	9.27702	8.86192	8.69225	8.81084	9.08746	8.95325	8.94355	9.01162	9.12904	9.30538	OXNAD1	92106	-0.168092	0.874061	-0.616806	0.0256587	-0.215732	0.139043	-0.3855	0.00370839	-0.233107
ENSG00000119771	1604.26	0.265196	0.0466261	5.68771	1.28757e-08	3.90786e-07	KLHL29	114818	10.7708	10.74	10.6059	10.2751	10.2791	10.2506	10.7565	10.8885	10.8649	10.9765	11.0213	10.9459	10.9649	10.8543	10.8997	10.6042	10.4807	10.6014	10.6561	10.5735	10.5453	10.687	10.6191	10.8332	10.5299	10.6747	10.4782	10.7768	10.7868	10.5655	KLHL29	114818	0.289625	0.449896	0.302562	0.222281	0.200506	0.309869	0.400245	0.0228733	0.0149882
ENSG00000092820	1698.08	-0.295266	0.0519236	-5.68655	1.29629e-08	3.92293e-07	EZR	7430	10.0172	9.62528	9.66688	10.0586	10.1015	10.0985	10.7879	10.7682	10.7241	10.3648	10.1425	10.2914	10.0225	9.99269	9.98741	11.1817	11.3632	11.2985	10.3889	10.5422	10.4281	10.3338	10.4532	10.2693	11.6763	11.5708	11.4079	11.8074	11.6282	11.716	EZR	7430	-0.53256	0.269439	-0.0998191	0.77379	-0.367914	0.24324	-0.194911	0.781203	-0.0723291
ENSG00000076003	640.746	-0.294861	0.051851	-5.68669	1.29524e-08	3.92293e-07	MCM6	4175	9.23137	9.03237	9.45332	9.67356	9.53147	9.5223	9.0865	9.10894	9.25833	8.95695	8.91876	8.9053	9.28672	9.21579	9.21163	9.52879	9.49555	9.61784	9.31077	9.08653	9.00402	9.71135	9.39067	9.63974	9.92676	9.84403	9.60169	9.92881	9.93214	9.8661	MCM6	4175	-0.424724	0.216649	-0.29111	0.568226	-0.375097	0.0693342	-0.238338	0.534056	-0.119299
ENSG00000008283	3039.87	-0.274284	0.0482511	-5.68451	1.31189e-08	3.96439e-07	CYB561	1534	11.7063	11.7951	11.7188	12.0925	12.0994	12.1266	11.5	11.5876	11.6249	11.3272	11.1771	11.068	11.6072	11.5603	11.4922	11.6678	11.7919	11.7621	11.5569	11.3621	11.3655	11.8442	11.9279	11.8574	11.3635	11.2024	10.6654	11.3372	11.4118	11.2623	CYB561	1534	-0.167319	0.950595	-0.0435916	0.873505	-0.325369	0.0362546	-0.242998	0.279793	-0.257486
ENSG00000128283	344.572	0.780945	0.137595	5.67566	1.38155e-08	4.16811e-07	CDC42EP1	11135	8.2432	8.03852	7.84702	7.09338	6.98673	7.11472	6.37877	6.61205	6.36039	10.0375	10.1848	10.2835	8.37092	8.46366	8.84186	6.21757	6.28339	6.15858	9.71199	9.33645	9.68114	7.97062	7.81742	7.98806	8.71905	8.42876	9.79847	8.26082	8.10799	8.49808	CDC42EP1	11135	0.502042	0.995764	0.751208	0.0155819	0.785072	0.166893	0.621305	0.459531	0.606346
ENSG00000227115	704.415	0.521269	0.0918464	5.67544	1.38331e-08	4.16811e-07	LINC01630	100287225	9.63274	9.81123	9.9798	9.58811	9.50366	9.61137	8.80129	8.70696	8.89252	8.29555	8.61773	8.18847	9.79545	10.0857	10.405	8.33931	8.59966	8.51415	7.99772	7.72645	7.54942	9.45824	9.02501	9.69491	9.87078	10.7797	10.4137	10.7747	10.5972	9.97259	LINC01630	100287225	0.368045	0.877218	0.0214765	0.987864	0.749392	0.00620876	0.749884	0.0315207	0.500504
ENSG00000100605	3255.79	-0.201371	0.0355155	-5.66995	1.42843e-08	4.29787e-07	ITPK1	3705	11.7001	11.6922	11.6366	11.8691	11.903	11.847	11.4926	11.5495	11.5925	11.8156	11.758	11.6282	11.7058	11.6197	11.7202	11.6049	11.685	11.7499	12.1156	11.7537	11.7961	11.9222	12.0474	12.0894	11.4513	11.2235	11.2004	11.3301	11.4403	11.3302	ITPK1	3705	-0.133003	0.9999	-0.251948	0.0487436	-0.340814	0.129562	-0.165667	0.740457	-0.162912
ENSG00000119421	1835.9	-0.255226	0.0450169	-5.66955	1.4317e-08	4.30148e-07	NDUFA8	4702	10.6245	10.7884	10.6604	10.9364	10.7631	10.8407	10.6656	10.8873	10.8917	10.9802	10.9422	10.8812	10.4574	10.3818	10.5843	10.9887	11.0856	11.0477	11.3406	11.1525	11.1779	10.6729	10.9849	10.842	11.1181	10.927	10.5442	10.9588	10.9797	10.9914	NDUFA8	4702	-0.22234	0.703222	-0.149108	0.783154	-0.372342	0.00964799	-0.30022	0.099904	-0.216849
ENSG00000019505	14753.3	-0.170508	0.0300779	-5.66888	1.4373e-08	4.31212e-07	SYT13	57586	14.224	14.2727	14.3371	14.4374	14.5237	14.42	14.0251	14.0382	14.1346	13.7808	13.7193	13.6737	13.6287	13.6436	13.5348	14.1385	14.0592	14.2443	14.0509	13.9736	13.8505	13.8118	13.6987	13.7517	12.8901	12.8823	12.6093	12.6872	12.914	12.9774	SYT13	57586	-0.0779164	0.9999	-0.153257	0.540863	-0.149067	0.45096	-0.237822	0.25966	-0.200709
ENSG00000168610	8497.94	-0.150867	0.0266154	-5.66839	1.44145e-08	4.31835e-07	STAT3	6774	12.5819	12.4705	12.5075	12.7224	12.6836	12.6749	12.5839	12.5351	12.7045	12.941	12.8837	13.0179	13.0643	12.99	13.0753	12.7245	12.786	12.8381	13.2644	13.0577	13.0327	13.1942	13.1656	13.1805	13.6257	13.6038	13.4621	13.6419	13.7045	13.6767	STAT3	6774	-0.170635	0.9999	-0.11704	0.294605	-0.133996	0.770325	-0.176192	0.815657	-0.101175
ENSG00000111110	2510.5	-0.213956	0.037766	-5.66532	1.46753e-08	4.39018e-07	PPM1H	57460	11.3003	11.4237	11.3278	11.4874	11.5325	11.4764	11.3747	11.3585	11.4973	11.4708	11.3215	11.4379	10.7143	10.7679	10.8365	11.3923	11.3912	11.5255	11.7838	11.6865	11.6818	11.1467	10.9047	11.2227	11.205	11.0995	10.9732	11.0866	11.303	11.3608	PPM1H	57460	-0.0212212	0.9999	-0.211543	0.362629	-0.330113	0.00968249	-0.313546	0.0317373	-0.245275
ENSG00000166987	618.618	0.499544	0.0882172	5.66266	1.49044e-08	4.45231e-07	MBD6	114785	9.05506	9.00069	8.68003	8.06869	8.28155	8.36768	9.27584	9.31536	8.95416	9.29564	9.32724	9.47844	10.2577	10.2604	10.058	8.99228	9.00421	8.54783	8.56706	9.00571	8.9474	9.56157	9.70014	9.73125	9.89446	9.76664	10.3949	9.45028	9.51768	9.62047	MBD6	114785	0.366923	0.802206	0.186271	0.756064	0.563797	0.0345526	0.571295	0.0785232	0.244668
ENSG00000130164	2522.13	-0.497378	0.0878474	-5.66184	1.49757e-08	4.46721e-07	LDLR	3949	10.996	11.0176	10.978	11.8665	11.8773	11.8407	10.8716	10.9287	11.1995	10.6664	10.3482	10.2317	10.7877	10.4801	10.3121	11.9182	11.8753	11.8673	10.7605	10.405	10.1334	10.8339	10.9057	10.6174	11.9689	11.7919	11.5777	11.9286	12.3608	12.1784	LDLR	3949	-0.893021	3.12313e-07	-0.665809	6.93966e-05	-0.256092	0.293798	-0.0306863	0.981977	-0.412561
ENSG00000162073	641.096	-0.270058	0.0477293	-5.65811	1.53046e-08	4.5588e-07	PAQR4	124222	9.75574	9.54924	9.50064	9.70289	9.73166	9.85924	9.60866	9.69293	9.61262	9.3599	9.4504	9.11682	9.49252	9.33059	9.13385	9.64025	9.82171	9.77893	9.78513	9.70534	9.71821	9.69378	9.40464	9.65317	8.71655	8.4419	8.44052	8.39223	8.67504	8.69577	PAQR4	124222	-0.112009	0.9999	-0.0500276	0.944441	-0.28114	0.212792	-0.457933	0.0388945	-0.319131
ENSG00000185567	10709.7	-0.428285	0.0757083	-5.65704	1.54003e-08	4.58078e-07	AHNAK2	113146	12.4025	12.5207	12.5252	12.7771	12.9487	12.8561	13.4552	13.3191	13.3685	13.5317	13.2855	13.519	12.7714	12.8562	13.0617	13.4141	13.2562	13.7484	14.057	13.8858	13.814	13.5207	13.0724	13.5763	13.5622	13.5001	12.975	13.5279	14.2202	14.1886	AHNAK2	113146	-0.101388	0.9999	-0.242547	0.638914	-0.50455	0.487078	-0.47651	0.691638	-0.667191
ENSG00000085721	1418.47	0.139278	0.0246279	5.65528	1.55596e-08	4.62156e-07	RRN3	54700	10.4568	10.4046	10.5412	10.3041	10.3925	10.2637	10.6217	10.5875	10.6039	10.4716	10.3867	10.5603	10.7232	10.7601	10.7122	10.4334	10.476	10.5362	10.3785	10.4345	10.3192	10.6639	10.4613	10.5556	10.5372	10.639	10.7056	10.6345	10.5169	10.5431	RRN3	54700	0.131831	0.98067	0.368537	0.156443	0.179205	0.302216	0.0995555	0.80844	0.128163
ENSG00000153113	2172.51	-0.192722	0.0340912	-5.65315	1.57536e-08	4.67254e-07	CAST	831	10.6721	10.6998	10.8019	11.0016	11.0297	10.9631	11.2325	11.0721	10.9909	11.1872	11.202	11.2194	10.8376	10.9975	11.0124	11.3452	11.4112	11.3572	11.3804	11.4728	11.4424	11.201	11.0197	11.0726	11.0329	11.0247	11.0626	11.1637	11.1734	11.1729	CAST	831	-0.271565	0.951109	-0.102197	0.766421	-0.149241	0.715322	-0.236223	0.668478	-0.0474146
ENSG00000119318	5246.08	-0.116799	0.0206768	-5.64879	1.61579e-08	4.78563e-07	RAD23B	5887	12.4042	12.3517	12.4273	12.4521	12.5475	12.4742	12.2922	12.2183	12.34	12.4847	12.3678	12.4133	12.1669	12.1812	12.1849	12.3806	12.3489	12.4273	12.5969	12.6181	12.5026	12.3545	12.3407	12.2795	12.3628	12.2642	12.1963	12.3522	12.3577	12.3515	RAD23B	5887	-0.0980392	0.905362	-0.104308	0.548746	-0.14592	0.107404	-0.153375	0.160953	-0.0890516
ENSG00000212864	1172.52	-0.325071	0.0575726	-5.64628	1.63957e-08	4.84919e-07	RNF208	727800	10.0655	10.286	9.96302	10.4074	10.4166	10.4261	10.2756	10.4578	10.4201	10.2602	10.3105	10.23	10.0336	9.95498	10.0249	10.4446	10.7162	10.5577	10.6196	10.4116	10.5563	10.2453	10.5974	10.4169	10.0805	9.8219	9.21626	9.8261	10.0771	9.85731	RNF208	727800	-0.191401	0.919696	-0.354883	0.333059	-0.440365	0.00514003	-0.277652	0.233346	-0.383872
ENSG00000167995	108.622	0.545148	0.0967176	5.63649	1.73551e-08	5.12564e-07	BEST1	7439	7.6123	7.34166	7.59161	7.12989	7.09999	7.21766	7.33914	7.16579	7.02635	7.40207	7.53501	7.43594	7.69278	7.55713	7.36727	7.05643	6.95401	6.77814	6.98281	6.80719	6.8971	6.94116	7.14241	6.88926	7.7123	7.52922	8.07487	7.60387	7.33812	7.51769	BEST1	7439	0.365678	0.884696	0.147241	0.916593	0.806535	0.000973969	0.835532	0.00516905	0.291786
ENSG00000176101	1506.39	-0.259736	0.0460976	-5.63447	1.75593e-08	5.17863e-07	SSNA1	8636	10.478	10.5919	10.388	10.7844	10.7323	10.7362	10.3216	10.6676	10.6024	10.758	10.5798	10.5629	10.5158	10.4108	10.5432	10.7647	10.8735	10.7698	10.8728	10.6962	10.787	10.6614	11.0106	10.906	10.5419	10.1867	10.068	10.3334	10.4232	10.2252	SSNA1	8636	-0.268119	0.766992	-0.0234289	0.97809	-0.38607	0.0479446	-0.157144	0.734315	-0.214973
ENSG00000204388	938.314	-0.270434	0.0480219	-5.63147	1.78682e-08	5.26228e-07	HSPA1B	3304	9.90091	10.0811	9.82653	10.1762	10.0544	10.4694	9.71779	9.78342	9.78135	10.0952	9.89483	10.0037	9.41707	9.28419	9.54263	9.73459	9.97759	9.98134	10.133	10.2386	10.2352	9.55323	9.82993	9.68186	10.3176	9.97943	9.79011	10.0175	10.3063	10.1784	HSPA1B	3304	-0.143036	0.996266	-0.467087	0.137197	-0.293465	0.12342	-0.21423	0.473244	-0.356859
ENSG00000146674	1233.04	-0.625103	0.111017	-5.63068	1.79505e-08	5.27907e-07	IGFBP3	3486	7.48585	7.54819	7.88882	8.58869	8.14311	8.27249	7.63496	7.49526	7.38121	11.3998	11.3034	11.5714	9.75074	9.83821	10.5112	7.93646	8.01518	7.97316	12.3279	12.3495	12.3608	10.7307	10.6639	10.4326	9.76474	8.75185	9.80419	9.05173	9.05297	9.40274	IGFBP3	3486	-0.608075	0.9999	-0.527218	0.00812031	-0.560002	0.761831	-0.932813	0.708301	-0.189184
ENSG00000104824	2894.55	-0.131972	0.0234637	-5.62449	1.86052e-08	5.46391e-07	HNRNPL	3191	11.5684	11.5459	11.4255	11.6223	11.6081	11.5658	11.6873	11.6729	11.7109	11.3037	11.2615	11.2367	11.4038	11.3798	11.4594	11.8345	11.919	11.8699	11.4149	11.2824	11.4158	11.5056	11.6154	11.6561	11.5024	11.3372	11.4344	11.3439	11.4885	11.4171	HNRNPL	3191	-0.182613	0.98067	-0.14037	0.496908	-0.179363	0.524996	-0.10863	0.873796	-0.103984
ENSG00000272341	351.328	0.437463	0.0778293	5.62081	1.90066e-08	5.57015e-07	NA	NA	9.23522	9.2442	9.467	9.03044	8.94032	9.01414	8.76657	8.81613	8.61536	8.78005	8.765	8.79328	8.79961	8.67991	8.27464	8.83895	8.7066	8.54115	8.18728	8.51462	8.30138	7.77143	7.88363	7.65009	8.29601	8.59988	8.51891	8.61785	8.34181	8.29601	NA	NA	0.0412836	0.9999	0.663914	0.0747567	1.01826	2.4156e-06	0.508425	0.0958764	0.313571
ENSG00000145335	5957.7	-0.332796	0.0592091	-5.62068	1.90204e-08	5.57015e-07	SNCA	6622	12.8548	12.9185	13.0665	13.4801	13.4365	13.39	12.7453	12.6827	12.6598	11.9878	11.9412	11.8363	12.7338	12.6335	12.4681	13.1182	13.0595	13.0179	12.1554	12.0681	11.8995	13.0165	13.0785	12.8033	10.8216	10.6904	10.1389	10.9292	11.0974	10.8563	SNCA	6622	-0.367783	0.00847914	-0.305212	0.0113123	-0.354679	0.00256628	-0.125022	0.642404	-0.317839
ENSG00000173846	1147.45	-0.204979	0.0364826	-5.61853	1.9259e-08	5.63212e-07	PLK3	1263	10.2211	10.382	10.2857	10.5753	10.5917	10.458	10.1868	10.2567	10.182	10.4233	10.419	10.3273	9.90029	9.95498	10.0057	10.351	10.4439	10.3626	10.6889	10.5779	10.5357	10.1212	10.2096	10.3277	9.83757	9.73269	9.4951	9.76127	9.78946	9.65595	PLK3	1263	-0.180397	0.942353	-0.380306	0.170616	-0.279563	0.113024	-0.22201	0.386202	-0.104016
ENSG00000159388	370.233	0.513384	0.0914151	5.61597	1.95465e-08	5.70819e-07	BTG2	7832	8.91781	8.67306	8.84669	8.14834	7.9061	8.04694	7.94274	8.11451	8.32977	9.21579	9.08473	9.21026	8.78137	8.70368	8.70187	7.81037	8.01518	7.96314	8.77359	9.04882	9.17396	8.0122	8.18118	8.17525	9.17178	9.1727	9.92125	9.12483	8.73466	9.08391	BTG2	7832	0.267147	0.992508	0.135545	0.796778	0.7171	0.011659	0.180164	0.836073	0.480871
ENSG00000130193	652.481	-0.305075	0.0543621	-5.6119	2.00113e-08	5.83573e-07	THEM6	51337	9.41918	9.57402	9.30123	9.74298	9.79723	9.71443	9.86247	10.0043	9.93471	9.7611	9.76138	9.61367	7.70406	7.81133	7.81974	10.1806	10.3294	10.3128	10.0454	9.71339	9.68114	8.07628	8.12103	8.04413	9.21951	8.95535	8.59322	9.10732	9.26901	9.14483	THEM6	51337	-0.352712	0.510711	-0.454032	0.213416	-0.378822	0.142101	-0.118294	0.858432	-0.346461
ENSG00000165704	1242.12	-0.242556	0.0432526	-5.60789	2.0481e-08	5.96436e-07	HPRT1	3251	10.0655	10.2423	10.3424	10.5513	10.5393	10.5474	10.2781	10.1246	10.3087	10.2845	10.2239	10.4357	10.0181	10.0619	10.1584	10.4207	10.3657	10.3943	10.5866	10.3884	10.5277	10.4874	10.6095	10.2938	10.4197	10.2984	10.0912	10.3087	10.3076	10.3318	HPRT1	3251	-0.157724	0.98067	-0.213282	0.565874	-0.403796	0.0099521	-0.194554	0.511401	-0.125393
ENSG00000259129	212.188	0.311149	0.0555067	5.60561	2.07521e-08	6.03488e-07	LINC00648	100506433	7.20761	7.42805	7.05121	7.07475	6.98673	7.16718	8.82848	8.67568	8.79217	7.52205	7.6257	7.7215	7.1087	7.17653	7.28729	8.4043	8.41256	8.34037	7.4788	7.25539	7.3551	7.18635	6.83052	7.0262	8.6691	8.988	8.97439	9.07806	8.87086	8.80291	LINC00648	100506433	0.446007	0.791477	0.759946	0.585911	0.265479	0.62689	0.355407	0.628399	0.257369
ENSG00000165637	5213.59	-0.178147	0.0317889	-5.60408	2.0936e-08	6.07989e-07	VDAC2	7417	12.278	12.2315	12.3376	12.4256	12.4454	12.4195	12.3674	12.3507	12.4255	12.3765	12.4675	12.391	12.0425	12.1339	12.1628	12.5008	12.6071	12.5162	12.6387	12.5291	12.51	12.2987	12.5121	12.3161	12.3717	12.1663	11.9618	12.3143	12.3066	12.2623	VDAC2	7417	-0.157318	0.792681	-0.187848	0.334041	-0.265149	0.0201076	-0.151356	0.426401	-0.163814
ENSG00000167037	1713.51	-0.240276	0.0428791	-5.60357	2.09977e-08	6.08933e-07	SGSM1	129049	10.7386	10.8275	10.7442	11.1214	11.2537	11.1638	10.96	10.9763	10.9716	10.704	10.5606	10.6419	10.816	10.7467	10.5924	11.3348	11.4464	11.4318	10.8913	10.823	10.7749	10.6678	10.7646	10.7294	10.0652	10.0415	9.88884	10.0169	10.1564	10.1403	SGSM1	129049	-0.441537	0.0199156	-0.29918	0.0566812	0.00328021	0.993923	-0.201447	0.482172	-0.147251
ENSG00000223960	349.216	0.335747	0.0599308	5.60224	2.11599e-08	6.12784e-07	CHROMR	101927027	8.4306	8.35182	8.78781	8.30307	8.33969	8.21336	8.8683	8.72744	8.59761	8.63609	8.81451	8.91356	8.62345	8.7922	8.75779	8.643	8.62285	8.47265	8.32546	8.50223	8.7295	8.21773	8.26379	8.00935	8.87944	9.12356	9.18388	9.03212	8.86175	8.89974	CHROMR	101927027	0.174146	0.98067	0.838556	0.0192684	0.663296	4.81072e-05	0.301665	0.264827	0.257052
ENSG00000114739	2041.69	0.30882	0.0551563	5.59899	2.15602e-08	6.23513e-07	ACVR2B	93	11.6826	11.5223	11.623	11.3122	11.3481	11.2961	10.9873	10.7889	10.9875	10.6148	10.5574	10.5876	11.2877	11.2101	11.127	10.8334	10.4045	10.6866	10.3715	10.201	10.125	10.9693	10.7207	10.8787	10.7575	11.2461	11.5805	11.149	11.1303	11.3432	ACVR2B	93	0.284921	0.896685	0.261481	0.54615	0.362967	0.193338	0.364212	0.319803	0.2413
ENSG00000168569	348.883	-0.236372	0.0422466	-5.59506	2.20544e-08	6.36921e-07	TMEM223	79064	8.57191	8.4493	8.45731	8.6444	8.45515	8.51666	8.39996	8.5199	8.52429	8.903	8.87797	8.93807	8.31018	8.31306	8.53322	8.69102	8.5938	8.61289	9.12686	9.10298	9.30355	8.55649	8.70589	8.65878	8.729	8.46981	8.34756	8.48645	8.66701	8.64202	TMEM223	79064	-0.167427	0.961998	-0.293352	0.620144	-0.294567	0.0530938	-0.305539	0.0774563	-0.285851
ENSG00000095794	739.578	0.442082	0.079067	5.59123	2.25465e-08	6.50232e-07	CREM	1390	9.26568	9.40825	9.37203	9.20072	9.22579	9.10426	9.08086	9.28123	9.29905	9.99223	9.9645	9.98031	9.93713	9.80165	9.72294	9.43071	9.40182	9.41476	9.46392	9.40764	9.32591	9.04375	9.1094	9.06365	9.94566	10.4388	10.4489	10.5553	9.70796	9.69303	CREM	1390	-0.204298	0.9999	0.5559	0.0183005	0.818722	0.0164321	0.619022	0.17794	0.72773
ENSG00000154975	3000.85	-0.22805	0.040795	-5.59015	2.26873e-08	6.53388e-07	CA10	56934	11.7832	11.7826	11.8813	12.1527	12.1306	12.0276	11.221	11.2464	11.2625	11.2424	11.0673	11.1	11.9438	11.8435	11.5297	11.4469	11.2931	11.4137	11.595	11.49	11.3162	12.0296	11.9907	11.9299	11.3766	11.116	11.267	11.0467	11.1972	11.3345	CA10	56934	-0.141086	0.9999	-0.318978	0.179476	-0.201116	0.450363	-0.342016	0.211398	-0.167509
ENSG00000109956	5974.64	-0.192286	0.0344106	-5.58801	2.29692e-08	6.60593e-07	B3GAT1	27087	12.6501	12.7548	12.6068	12.8607	12.8505	12.8749	12.4601	12.5852	12.5728	12.3849	12.3456	12.2643	12.672	12.6341	12.6797	12.5541	12.5694	12.6998	12.7443	12.4487	12.4139	12.8759	12.8809	12.9803	12.1494	12.037	11.8512	12.0651	12.3091	12.1839	B3GAT1	27087	-0.0642125	0.9999	-0.109181	0.586445	-0.249891	0.115504	-0.214545	0.328271	-0.233843
ENSG00000117308	716.56	-0.236379	0.0423059	-5.58737	2.30531e-08	6.62095e-07	GALE	2582	9.23906	9.27477	9.42557	9.75703	9.6928	9.82438	9.36654	9.45661	9.49971	9.91276	9.87171	9.72561	9.59132	9.6606	9.58704	9.68819	9.84644	9.55658	9.96141	9.92675	9.97056	9.71634	9.83407	9.85071	9.21716	9.07397	8.91107	9.15371	9.16306	9.16457	GALE	2582	-0.273295	0.0841915	-0.131635	0.815833	-0.19993	0.0639321	-0.123	0.540056	-0.148062
ENSG00000168490	287.888	-0.469582	0.0840999	-5.58362	2.35558e-08	6.75602e-07	PHYHIP	9796	8.46396	8.57176	8.51137	9.10716	9.0713	9.10426	8.00416	7.81009	8.154	8.84693	8.48108	8.52273	8.58485	8.20438	8.17392	8.34534	8.79084	8.47965	8.60963	8.77858	8.53145	8.59505	8.87633	8.65878	7.5198	7.37857	6.87809	7.28779	7.68825	7.59175	PHYHIP	9796	-0.663289	0.671041	-0.662722	0.00210365	-0.442699	0.430574	-0.0207619	0.993838	-0.564442
ENSG00000164070	2456.48	-0.290795	0.0520934	-5.58219	2.37507e-08	6.80254e-07	HSPA4L	22824	11.2036	11.1104	11.22	11.4525	11.6429	11.5529	11.2688	11.012	11.2966	11.033	11.0084	11.1934	10.6478	10.7179	10.831	11.3059	11.053	11.2955	11.6562	11.4861	11.4844	11.3243	10.8739	11.0734	11.5841	11.4414	11.4582	11.4682	11.5956	11.7575	HSPA4L	22824	-0.0214069	0.9999	-0.617143	0.00308521	-0.375266	0.0178598	-0.475671	0.00303456	-0.198971
ENSG00000106366	1685.9	-0.55306	0.0990925	-5.58125	2.388e-08	6.81596e-07	SERPINE1	5054	7.41797	7.23337	7.35578	7.42016	7.24664	7.54598	6.63831	6.18251	5.88848	12.2406	12.2443	12.16	10.4276	10.5421	10.8958	6.38737	7.02866	7.09785	12.8662	12.8444	12.7731	11.2133	11.1228	11.2735	9.31869	8.30908	8.39133	8.90187	8.73081	8.89329	SERPINE1	5054	-1.1122	0.9999	-0.525776	0.0612765	-0.582079	0.829402	-0.620448	0.914288	-0.508283
ENSG00000145592	9680.21	0.159171	0.0285175	5.58153	2.38408e-08	6.81596e-07	RPL37	6167	13.3301	13.4477	13.5379	13.24	13.1941	13.2263	13.077	13.0344	13.1858	13.2135	13.348	13.3341	13.2248	13.3093	13.3979	12.9977	12.8257	12.8877	13.1914	13.0653	13.0778	13.135	13.2218	13.2518	13.3562	13.4004	13.5222	13.4169	13.3463	13.385	RPL37	6167	0.200949	0.330405	0.177094	0.420173	0.112486	0.402716	0.18666	0.170735	0.0809075
ENSG00000155256	3074.06	0.142505	0.0255333	5.58113	2.38956e-08	6.81596e-07	ZFYVE27	118813	11.7963	11.8638	11.8333	11.6941	11.7233	11.7693	11.5987	11.6957	11.6657	11.5529	11.6338	11.6363	11.6277	11.578	11.5886	11.5823	11.6376	11.5807	11.484	11.4016	11.4201	11.3739	11.3175	11.4003	11.6353	11.6993	11.5912	11.7725	11.5529	11.4744	ZFYVE27	118813	0.0602485	0.9999	0.185352	0.387534	0.241994	0.00509834	0.173989	0.144806	0.133153
ENSG00000104164	2588.84	0.181111	0.0324887	5.57458	2.48126e-08	7.06785e-07	BLOC1S6	26258	11.441	11.4999	11.6554	11.4594	11.5152	11.425	11.3245	11.3204	11.3713	11.3162	11.3617	11.3571	11.3781	11.4356	11.3753	11.2654	11.2446	11.3238	11.1395	11.2797	11.1227	11.2054	11.0835	11.044	11.287	11.6233	11.5586	11.6937	11.3344	11.3877	BLOC1S6	26258	0.0671693	0.9999	0.229372	0.238511	0.294435	0.00639612	0.164602	0.351368	0.292305
ENSG00000163291	1955.88	0.231967	0.0416168	5.57389	2.49112e-08	7.08628e-07	PAQR3	152559	11.1145	11.0945	11.3529	10.9265	11.1705	11.0587	10.9962	10.8691	10.9716	11.2032	11.1771	11.3533	11.315	11.3374	11.2207	10.8408	10.7454	10.8132	11.0314	11.233	10.9752	11.0276	10.8031	10.8045	10.3723	10.5789	10.5746	10.7279	10.3739	10.3572	PAQR3	152559	0.155079	0.98859	0.338304	0.186112	0.424181	0.0124992	0.165027	0.666988	0.268462
ENSG00000196460	14.3553	1.26484	0.22696	5.57294	2.50477e-08	7.10572e-07	RFX8	731220	5.72574	5.59479	6.29211	5.52749	5.87604	5.81006	5.6998	5.75094	5.58805	6.28129	5.86344	6.09869	6.27922	6.26702	6.14046	5.7593	5.50435	5.61671	5.51486	5.82555	5.73574	5.39455	5.69446	5.72395	5.42499	5.88845	6.04298	6.04351	5.3131	5.49786	RFX8	731220	0.161573		0.249339		1.72291		1.13551		2.04354
ENSG00000170485	219.712	-0.429364	0.0770432	-5.57302	2.50357e-08	7.10572e-07	NPAS2	4862	7.70574	7.52239	7.59161	7.64706	8.15758	8.20123	8.09719	8.07485	8.28598	7.46882	7.39411	7.26054	8.14383	8.30918	8.0513	8.43288	8.47132	8.26119	7.35261	7.69371	7.89169	8.48201	8.69681	8.41119	8.20707	8.23304	7.94188	8.07439	8.68701	8.53176	NPAS2	4862	-0.278713	0.994683	-0.132564	0.903259	-0.429918	0.267397	-0.393333	0.554974	-0.482767
ENSG00000101152	8663.13	-0.149058	0.0267609	-5.57	2.54743e-08	7.21692e-07	DNAJC5	80331	13.119	13.1554	13.0876	13.2745	13.26	13.2196	12.9935	13.0762	13.1426	12.9833	12.9751	12.9296	13.0281	12.9328	12.9763	13.113	13.1725	13.222	13.3046	13.0551	13.0476	13.1348	13.1495	13.205	13.0465	12.9438	12.8129	13.0207	13.1228	13.0659	DNAJC5	80331	-0.0928178	0.953915	-0.0723992	0.629961	-0.181812	0.0369637	-0.180653	0.080484	-0.154236
ENSG00000269893	977.409	0.332576	0.0597239	5.56856	2.56847e-08	7.25679e-07	SNHG8	100093630	9.73415	10.0012	9.91645	9.36766	9.32132	9.5534	9.05811	9.44433	9.49654	10.5979	10.6925	10.6419	10.2492	10.3475	10.7137	9.05224	9.34737	9.13027	10.3031	10.2735	10.2253	9.99577	10.4138	10.3164	9.9098	10.0497	10.2899	10.0786	9.69818	9.76993	SNHG8	100093630	0.189144	0.9999	0.659406	0.160739	0.209782	0.506758	0.390948	0.206993	0.362796
ENSG00000135299	2118.47	0.255009	0.0457926	5.56878	2.56528e-08	7.25679e-07	ANKRD6	22881	11.0274	11.0244	11.0191	10.9718	11.0355	10.9143	10.9149	10.9985	10.9109	11.0753	11.1979	11.0513	10.9649	11.0165	11.1496	10.7042	10.6205	10.6189	10.791	10.5823	10.4804	10.8701	10.5367	10.9209	11.5297	11.7863	11.6527	11.7388	11.5643	11.598	ANKRD6	22881	0.307846	0.269223	0.376648	0.09249	0.271488	0.0900425	0.499012	0.000599305	0.162818
ENSG00000259683	545.068	0.39399	0.0707583	5.56811	2.57516e-08	7.26586e-07	NA	NA	8.75529	8.84112	8.69177	8.29534	8.4493	8.74597	9.66614	9.53109	9.13285	9.3513	9.58296	9.48952	10.0014	9.88425	9.67499	9.2443	9.33692	9.07147	8.77359	9.00133	9.25389	9.40056	9.17285	9.29575	8.88167	9.27578	9.46782	8.98465	9.05543	8.99979	NA	NA	0.263151	0.98067	0.452766	0.413589	0.615061	0.0276941	0.497502	0.190912	0.298892
ENSG00000152953	993.654	-0.314179	0.0564543	-5.5652	2.61858e-08	7.37838e-07	STK32B	55351	10.6876	10.6366	10.5966	11.0365	11.1165	10.9344	10.5132	10.4332	10.5251	9.1042	9.31966	8.94212	8.80478	8.67991	8.5633	10.6545	10.7041	10.7251	9.66396	9.16304	9.16572	8.99117	9.08182	8.86972	9.83336	9.37197	9.71701	9.20503	9.71884	9.79698	STK32B	55351	-0.206626	0.9999	-0.111357	0.831408	-0.33391	0.495082	-0.244456	0.806449	-0.369311
ENSG00000056487	440.702	0.370774	0.0666724	5.56114	2.68022e-08	7.54186e-07	PHF21B	112885	9.43935	9.00981	9.1007	8.65649	8.58876	8.58801	8.73099	8.89964	8.90698	8.31347	8.58001	8.12541	8.69765	8.54823	8.55334	8.8175	8.54606	8.65673	8.03413	7.89869	8.17481	8.03658	8.02205	8.31807	9.81486	9.89645	9.93459	9.91268	9.71729	9.84033	PHF21B	112885	0.199155	0.9999	0.811465	0.169394	0.561576	0.425234	0.376794	0.798217	0.126917
ENSG00000140830	614.75	0.333353	0.0599574	5.55983	2.70044e-08	7.58853e-07	TXNL4B	54957	9.59429	9.68619	9.63997	9.4939	9.28583	9.42475	9.71052	9.62384	9.36329	9.57935	9.5987	9.47287	9.60321	9.54574	9.29536	9.33149	9.40516	9.40382	9.26601	9.04456	9.08496	8.66399	9.07134	8.91886	9.32142	9.40008	9.23797	9.53666	9.30919	9.20557	TXNL4B	54957	0.210934	0.826615	0.32716	0.362956	0.655292	1.27279e-06	0.45274	0.0064758	0.125873
ENSG00000185052	795.226	-0.336146	0.0604688	-5.559	2.71323e-08	7.60398e-07	SLC24A3	57419	10.4633	10.3767	10.32	10.6688	10.7106	10.6571	9.71416	9.62384	9.99896	9.1042	8.85713	8.99758	9.34454	9.21579	8.8554	10.0418	10.1798	10.2813	9.49333	9.53117	9.47335	9.29452	9.23361	9.10666	9.30493	9.09261	8.65115	9.01283	9.25838	9.20788	SLC24A3	57419	-0.398066	0.0545889	-0.114685	0.749682	-0.061662	0.840546	-0.558647	0.000546915	-0.36277
ENSG00000100523	3161.49	-0.256635	0.046164	-5.55921	2.71006e-08	7.60398e-07	DDHD1	80821	11.3348	11.3423	11.5398	11.7302	11.7961	11.7053	11.5987	11.4978	11.611	11.6145	11.5746	11.784	11.2228	11.2682	11.1778	11.7485	11.5197	11.7685	12.2051	11.982	12.0422	11.5163	11.1799	11.3579	11.7063	11.6476	11.6795	11.664	11.9608	12.0731	DDHD1	80821	-0.11094	0.98067	-0.243161	0.429764	-0.133708	0.400524	-0.426501	0.000172813	-0.264968
ENSG00000226287	424.685	-0.343975	0.0618924	-5.55763	2.73469e-08	7.65384e-07	TMEM191A	84222	8.45735	8.72946	8.45041	8.78313	8.70113	8.78288	9.06383	9.06142	8.9213	8.89907	9.04846	8.95418	8.64669	8.5678	8.68375	9.33451	9.34041	9.19947	9.20406	9.21314	9.24218	8.87984	9.05014	9.06029	9.05097	8.69231	8.08526	8.66348	8.91081	8.71622	TMEM191A	84222	-0.30154	0.890309	0.202111	0.82064	-0.412503	0.139043	-0.281566	0.559122	-0.450406
ENSG00000214517	3103.47	-0.172711	0.0311035	-5.55278	2.81168e-08	7.85875e-07	PPME1	51400	11.5195	11.5498	11.5161	11.6985	11.6793	11.655	11.5456	11.6457	11.5365	11.6964	11.7376	11.6677	11.3751	11.3669	11.5016	11.6105	11.7354	11.6716	12.0336	11.8424	11.8952	11.6472	11.6433	11.553	11.6744	11.4718	11.264	11.5974	11.6423	11.5625	PPME1	51400	-0.0924005	0.97092	-0.113231	0.607072	-0.199759	0.024745	-0.230548	0.0158949	-0.181982
ENSG00000102743	385.875	-0.242972	0.0437837	-5.54937	2.86706e-08	8.00281e-07	SLC25A15	10166	8.74449	8.88147	8.84669	8.94448	9.08263	8.86546	8.6945	8.67568	8.61536	8.78858	8.75939	8.54955	8.70873	8.64351	8.7168	8.90958	8.81618	8.62555	8.88159	8.9881	9.07178	8.98704	8.93921	9.08697	8.65263	8.54197	8.32297	8.53811	8.6654	8.66663	SLC25A15	10166	-0.148762	0.963823	-0.408829	0.346443	-0.355072	0.00250273	-0.319481	0.0388945	-0.222226
ENSG00000166068	3849.61	-0.289296	0.0521419	-5.54824	2.88556e-08	8.0437e-07	SPRED1	161742	11.3535	11.2561	11.4237	11.4891	11.4935	11.5011	11.9355	11.819	11.8572	11.7293	11.706	11.799	10.9511	11.0732	11.2714	11.9637	11.8264	11.9746	12.402	12.1621	12.1649	11.6215	11.2718	11.5447	12.5814	12.4893	12.3041	12.524	12.8997	12.827	SPRED1	161742	-0.0482796	0.9999	-0.175275	0.61203	-0.387508	0.00140538	-0.510545	1.47378e-05	-0.338548
ENSG00000070961	4672.4	-0.242266	0.0437005	-5.54378	2.96012e-08	8.24052e-07	ATP2B1	490	12.0902	12.172	12.2155	12.5513	12.5454	12.5109	11.7479	11.7188	11.7901	11.9901	11.8277	12.1755	12.2898	12.2405	12.0739	12.0283	11.8283	12.1219	12.2893	12.3572	12.2519	12.5937	12.4004	12.3672	12.119	12.1894	12.19	12.3128	12.2868	12.3846	ATP2B1	490	-0.244344	0.995764	-0.257645	0.256705	-0.252653	0.551404	-0.300715	0.620398	-0.0389173
ENSG00000099797	2040.36	-0.230986	0.0416745	-5.54261	2.97993e-08	8.28459e-07	TECR	9524	10.9789	11.0006	11.004	11.3414	11.2907	11.2237	11.0316	11.1647	11.113	10.7634	11.0283	10.8632	10.6159	10.5713	10.7944	11.263	11.4768	11.3325	11.125	10.7929	10.9347	10.8845	11.0818	11.0105	11.1403	10.9119	10.8002	10.9652	11.1197	10.9478	TECR	9524	-0.256803	0.813536	0.0207196	0.975126	-0.338238	0.10632	-0.072119	0.929026	-0.186091
ENSG00000106348	3579.72	-0.227054	0.0409673	-5.54233	2.98468e-08	8.28677e-07	IMPDH1	3614	11.6178	11.6565	11.5741	11.7948	11.66	11.7457	11.9016	11.999	11.8945	11.7846	11.8297	11.7208	11.439	11.3903	11.5987	12.0372	12.2145	12.2171	12.138	11.8277	11.9386	11.6491	11.7564	11.8053	12.0258	11.7832	11.4551	11.8699	12.0935	11.9565	IMPDH1	3614	-0.223943	0.725108	-0.171954	0.506373	-0.261198	0.122886	-0.199319	0.440313	-0.319402
ENSG00000136274	5205.6	-0.172975	0.0312483	-5.5355	3.10348e-08	8.60515e-07	NACAD	23148	12.0339	12.1715	12.0849	12.2903	12.2461	12.3122	12.3217	12.3515	12.4019	12.2199	12.1856	12.1836	12.3465	12.3485	12.39	12.4034	12.5322	12.5031	12.4444	12.2782	12.3893	12.3755	12.4331	12.5209	12.6118	12.3844	12.1419	12.4587	12.6566	12.589	NACAD	23148	-0.117958	0.984879	-0.107246	0.552761	-0.0802645	0.70881	-0.179254	0.402406	-0.289835
ENSG00000138496	83.2622	1.04506	0.18884	5.53412	3.12802e-08	8.66166e-07	PARP9	83666	6.33398	6.03899	6.14043	5.67917	5.61129	5.56126	6.04093	5.85495	5.88848	6.92861	7.09643	7.28704	6.32939	6.24846	6.3846	5.93788	5.5817	5.68929	6.43266	6.34443	6.28173	5.47977	5.69446	5.8563	8.31713	8.24697	9.35465	8.0133	7.90277	8.49524	PARP9	83666	0.530147		0.84187	0.374806	1.66929		1.3268		0.464571
ENSG00000175274	6371.76	-0.282181	0.0509971	-5.53327	3.14316e-08	8.69204e-07	TP53I11	9537	13.0307	13.0678	12.9721	13.5765	13.6359	13.5411	12.4078	12.3585	12.3466	12.4328	12.5356	12.2101	12.7193	12.688	12.5425	12.8052	12.7709	12.8324	12.7903	12.4427	12.5341	12.7457	12.9098	12.8232	11.5476	11.5009	11.3993	11.6311	11.5837	11.5177	TP53I11	9537	-0.431215	0.023375	-0.0935015	0.693879	-0.174238	0.405418	-0.201018	0.467487	-0.0398422
ENSG00000107798	1049.51	-0.27471	0.0496595	-5.53188	3.16822e-08	8.74973e-07	LIPA	3988	9.83903	9.74735	9.89133	10.1887	10.0563	9.98907	10.2205	9.91822	10.041	9.55212	9.66	9.54367	9.41707	9.32296	9.54763	10.2979	10.2867	10.2265	10.0607	9.99652	9.72382	9.92224	9.56494	9.72066	10.826	10.4958	10.8999	10.5526	10.8187	10.9048	LIPA	3988	-0.215764	0.702557	-0.28364	0.384906	-0.330391	0.0222298	-0.3752	0.0185824	-0.202308
ENSG00000105649	9826.35	-0.238673	0.0431952	-5.52546	3.28624e-08	9.06368e-07	RAB3A	5864	13.2587	13.3761	13.22	13.5296	13.4652	13.4253	13.2618	13.314	13.3409	13.1794	13.2533	13.2411	13.0673	12.9669	13.1163	13.3524	13.504	13.4382	13.5381	13.2998	13.447	13.2964	13.5145	13.4297	13.2041	12.9316	12.5004	13.0066	13.1528	13.0218	RAB3A	5864	-0.122619	0.98067	-0.225765	0.0783499	-0.363755	0.0034402	-0.20931	0.273952	-0.302403
ENSG00000113504	510.64	0.299762	0.0542853	5.52198	3.35191e-08	9.20958e-07	SLC12A7	10723	9.65302	9.55858	9.50396	9.35292	9.33085	9.45801	8.73099	9.21042	8.90698	9.65576	9.81356	9.67073	9.34808	9.34384	9.49508	8.59835	8.71202	8.98586	9.52849	9.42408	9.38742	9.12856	8.9315	9.23445	7.74415	8.14899	8.32734	8.16519	7.79516	8.04735	SLC12A7	10723	0.224347	0.995764	0.302237	0.372301	0.326076	0.315814	0.285883	0.573928	0.427398
ENSG00000116793	983.754	-0.205734	0.0372574	-5.52196	3.35239e-08	9.20958e-07	PHTF1	10745	9.87894	9.82677	9.90646	10.123	10.2121	10.1353	10.0177	10.1072	9.98316	9.77401	9.64795	9.86816	9.94765	9.90481	9.81291	10.4179	10.4326	10.3264	10.0542	9.8941	10.017	9.96052	9.94709	9.87574	10.0359	10.0138	9.90828	10.0467	10.155	10.1114	PHTF1	10745	-0.368706	0.00287113	-0.0707601	0.862902	-0.0370258	0.869248	-0.236451	0.119615	-0.119506
ENSG00000145908	734.804	0.193301	0.0350047	5.52215	3.34875e-08	9.20958e-07	ZNF300	91975	9.62101	9.62528	9.6248	9.40027	9.44931	9.56048	10.1061	9.96192	9.90148	9.60608	9.663	9.72092	9.80834	9.86732	9.7376	9.97574	9.95047	9.82613	9.24693	9.50359	9.38387	9.60521	9.45919	9.52018	9.26853	9.48173	9.40552	9.38297	9.29211	9.29294	ZNF300	91975	0.0810435	0.9999	0.275953	0.53703	0.299551	0.294919	0.303062	0.452209	0.14882
ENSG00000165959	310.639	0.383186	0.069425	5.51942	3.40126e-08	9.33152e-07	CLMN	79789	8.11422	8.16735	8.19316	7.90472	8.00574	7.84258	8.2963	7.9487	8.39304	8.76283	8.89851	9.10606	8.2844	8.31306	8.41715	7.96037	7.80625	7.90146	8.31076	8.64989	8.60057	7.78113	7.63671	7.85309	8.94841	9.32223	9.26313	9.22453	9.21728	9.29619	CLMN	79789	0.418142	0.982698	0.377587	0.341037	0.72408	0.167674	0.457769	0.628569	0.117097
ENSG00000156030	1006.67	0.497014	0.0901386	5.51389	3.50988e-08	9.61688e-07	MIDEAS	91748	9.84911	9.85482	9.95091	9.3192	9.32768	9.3854	9.63577	9.6641	9.72003	10.2949	10.2559	10.3056	10.8784	10.7839	10.4466	9.62309	9.39512	9.5063	9.93309	10.0631	10.1014	9.82412	9.53733	9.73547	10.0511	10.3341	11.0758	10.0918	10.1328	10.3465	MIDEAS	91748	0.179045	0.90067	0.685512	0.019746	1.06606	8.53963e-22	0.262925	0.173393	0.389296
ENSG00000184845	43.135	-0.731776	0.132753	-5.51229	3.54188e-08	9.69184e-07	DRD1	1812	7.01551	6.52294	6.72906	7.42016	7.72246	7.62169	5.91959	6.11022	6.189	5.83554	5.60863	5.94795	6.56511	6.65367	6.52715	6.38737	6.34833	6.34728	5.89579	5.77087	6.00152	7.01115	6.94837	7.01168	5.74037	5.79159	5.47915	5.51707	5.70179	5.81475	DRD1	1812	-0.613572	0.98067	-2.49568		-0.690713	0.277381	-0.229857	0.941169	-0.496564
ENSG00000188981	372.362	-0.354585	0.0643401	-5.51111	3.56577e-08	9.74441e-07	MSANTD1	345222	8.14758	8.28543	8.40826	8.72121	8.63065	8.72505	9.11434	9.03296	9.20088	8.30155	8.63623	8.36843	8.21586	8.26177	8.3987	9.21512	9.44135	9.44355	9.10583	8.55717	8.88343	8.37832	8.73722	8.63179	8.76167	8.694	8.29646	8.69337	8.81459	8.73158	MSANTD1	345222	-0.271774	0.843346	-0.243051	0.755185	-0.348251	0.1516	-0.493839	0.0517331	-0.22616
ENSG00000246859	246.183	0.493668	0.0896278	5.50798	3.62981e-08	9.90642e-07	STARD4-AS1	100505678	8.28121	8.38036	8.24208	7.62222	8.1719	7.81881	8.28649	8.26289	8.12107	8.87924	8.66653	9.2401	8.55443	8.66788	8.5699	8.30257	7.86639	7.91193	7.90232	8.67216	8.72388	8.20349	7.83427	7.95917	7.35208	7.75791	7.9323	7.63311	7.51886	7.40886	STARD4-AS1	100505678	0.224751	0.9999	0.149863	0.856755	0.71456	0.0114656	0.538039	0.148117	0.465075
ENSG00000236404	192.53	0.369892	0.067198	5.50451	3.70201e-08	1.00903e-06	VLDLR-AS1	401491	7.58792	7.67044	7.61687	7.46302	7.3275	7.47614	7.8385	7.81977	8.02634	8.00272	8.25987	7.93384	8.55443	8.59349	8.52305	7.65218	7.54816	7.68601	7.78931	7.4662	7.36994	8.44022	8.12103	8.50853	7.82464	8.13656	7.86934	8.21381	7.82467	7.70589	VLDLR-AS1	401491	0.356189	0.776095	1.19969	0.0601942	0.228095	0.444977	0.663844	0.0138489	0.37245
ENSG00000022567	1154.26	-0.209041	0.0379954	-5.50174	3.76065e-08	1.02367e-06	SLC45A4	57210	10.1372	10.1236	10.0221	10.2154	10.1561	10.2651	10.2205	10.2266	10.5016	10.0411	10.0811	10.1275	9.86987	9.77397	9.80458	10.351	10.3777	10.5966	10.4928	10.2789	10.274	10.0851	9.95659	10.1338	10.5075	10.3737	10.2228	10.3672	10.6234	10.5415	SLC45A4	57210	-0.122805	0.9999	-0.218404	0.420506	-0.254934	0.305464	-0.283284	0.370365	-0.247897
ENSG00000152207	16.5163	1.83994	0.334452	5.50137	3.76856e-08	1.02449e-06	CYSLTR2	57105	5.51287	5.178	5.52581	4.83516	5.15519	4.83516	5.22645	5.80455	5.51006	5.14228	5.18437	4.83516	5.88937	6.15054	6.16133	4.83516	5.31045	5.68929	5.42514	5.17105	4.83516	5.39455	5.51819	5.77044	5.99867	7.03467	7.38854	7.26484	5.7621	5.85449	CYSLTR2	57105	0.744691		1.45247	0.163685	1.52976		-1.13172		2.66815
ENSG00000153879	2590.71	0.276389	0.0502636	5.49878	3.82421e-08	1.03826e-06	CEBPG	1054	11.2911	11.3664	11.4325	11.2698	11.2587	11.3143	11.0562	11.0671	11.0111	11.4333	11.4318	11.3736	11.8269	11.8725	11.7623	11.0678	10.9439	11.1129	11.0945	10.9576	10.8979	11.4787	11.3495	11.4619	11.3428	11.817	11.4982	11.9013	11.3847	11.2147	CEBPG	1054	0.00651843	0.9999	0.537558	1.02013e-05	0.400691	5.4376e-09	0.436283	4.45715e-09	0.439663
ENSG00000126775	610.871	0.234949	0.0427767	5.49245	3.96385e-08	1.07478e-06	ATG14	22863	9.38144	9.43892	9.31265	9.1547	9.33085	9.12354	9.41208	9.35528	9.39437	9.29564	9.46765	9.41012	9.49412	9.55064	9.53425	9.26027	9.3264	9.37421	9.17206	9.20555	9.17396	9.35653	9.11281	9.11964	9.41607	9.6584	9.87507	9.54506	9.39315	9.48301	ATG14	22863	0.0777759	0.9999	0.469722	0.151151	0.361236	0.0021605	0.224505	0.227744	0.28329
ENSG00000156471	3667.94	-0.191588	0.0349128	-5.48761	4.07404e-08	1.10322e-06	PTDSS1	9791	11.8636	11.8819	11.9375	12.1622	12.1343	12.0645	11.7907	11.7805	11.8367	11.9159	11.9138	11.8412	11.5921	11.5419	11.619	11.8556	11.9626	11.9289	12.2856	12.0702	12.0029	11.8097	11.8176	11.7932	11.7558	11.6492	11.3732	11.8	11.8175	11.7292	PTDSS1	9791	-0.11005	0.896685	-0.266007	0.0169573	-0.222721	0.0140839	-0.238856	0.0161183	-0.154184
ENSG00000115107	1703.52	-0.405238	0.0738971	-5.48382	4.16248e-08	1.12571e-06	STEAP3	55240	8.72265	9.0937	9.1007	9.42514	9.56682	9.42475	8.94479	9.10504	9.22028	11.7099	11.6376	12.0053	10.1766	10.1962	10.8721	9.17188	9.31225	9.24109	12.3446	12.2088	12.3239	10.9568	10.7668	10.8144	10.8415	10.3398	10.4123	10.8077	10.7071	11.157	STEAP3	55240	-0.15891	0.9999	-0.146126	0.454595	-0.405894	0.787047	-0.5089	0.844712	-0.394131
ENSG00000138757	10655.5	-0.158281	0.0288711	-5.48234	4.19735e-08	1.13366e-06	G3BP2	9908	13.3152	13.3047	13.4465	13.493	13.5705	13.4654	13.368	13.3028	13.4085	13.1177	13.081	13.0939	12.9076	12.9897	12.9984	13.4586	13.3374	13.4669	13.4833	13.3403	13.229	13.2119	13.0778	13.0978	13.7524	13.6574	13.5825	13.7284	13.8114	13.8587	G3BP2	9908	-0.0573863	0.9999	-0.179277	0.376075	-0.162343	0.0764881	-0.260009	0.00265509	-0.154323
ENSG00000099365	5889.69	-0.223584	0.0408203	-5.47728	4.31902e-08	1.16502e-06	STX1B	112755	12.4287	12.4906	12.3269	12.6445	12.6876	12.6241	12.5824	12.6332	12.6914	12.1962	12.1615	12.0972	12.6558	12.4904	12.4055	12.5895	12.7452	12.7816	12.5137	12.2768	12.3911	12.7356	12.8201	12.7476	12.6149	12.5156	12.0721	12.436	12.7154	12.6463	STX1B	112755	-0.0670077	0.9999	-0.124165	0.518789	-0.246331	0.270009	-0.249221	0.404158	-0.310027
ENSG00000262814	295.33	-0.338509	0.0618879	-5.46972	4.50759e-08	1.21431e-06	MRPL12	6182	8.44404	8.42213	8.23404	8.46341	8.5456	8.51178	8.38167	8.49619	8.50536	8.8305	8.81991	8.65702	8.09793	8.07296	8.10712	8.5933	8.83117	8.75216	8.99581	8.84374	8.88343	8.48201	8.64581	8.5282	8.1598	7.69437	7.44982	7.78949	8.10081	7.78023	MRPL12	6182	-0.300086	0.825582	-0.129775	0.924745	-0.548985	0.0115431	-0.158041	0.793741	-0.478596
ENSG00000162670	552.349	-0.396238	0.072456	-5.46867	4.53414e-08	1.21989e-06	BRINP3	339479	9.11068	8.63222	8.83087	9.25327	9.21553	9.25752	8.59501	8.19804	8.202	9.48039	9.31966	9.46167	8.74954	8.78942	8.43897	8.55745	8.452	8.35569	9.93785	9.74513	9.91518	9.17641	9.35658	9.00538	10.0006	9.42714	9.87359	9.40299	9.5927	10.0427	BRINP3	339479	-0.133082	0.9999	-0.137607	0.787952	-0.581098	0.254711	-0.480662	0.546696	-0.336022
ENSG00000000003	483.985	0.29818	0.0545692	5.46426	4.64834e-08	1.249e-06	TSPAN6	7105	9.40557	9.13179	9.26644	8.95917	8.80987	8.80697	8.90067	8.86312	8.96802	9.29265	9.13749	9.23023	8.86046	8.90401	8.93663	8.78691	8.90386	9.03878	9.14758	9.13533	9.0224	8.33333	8.52265	8.46325	9.34581	9.46901	9.73781	9.50471	9.14932	9.27489	TSPAN6	7105	0.00498425	0.9999	0.200928	0.699374	0.529908	0.00426701	0.130718	0.813164	0.338281
ENSG00000163812	1955.85	-0.134523	0.0246317	-5.4614	4.72386e-08	1.26766e-06	ZDHHC3	51304	10.878	10.8656	10.8742	10.9352	11.0297	11.019	10.9873	10.9688	10.9601	10.9137	10.9198	10.7722	10.9661	10.9445	10.9421	10.9954	10.999	11.043	11.0698	11.0345	11.017	11.155	11.1912	11.1063	11.0537	10.8434	10.8259	10.9427	10.9957	10.9057	ZDHHC3	51304	-0.0369249	0.9999	-0.312166	0.0453356	-0.202101	0.000177916	-0.178334	0.00976899	-0.121758
ENSG00000187867	1746.77	-0.495021	0.0906553	-5.46048	4.74852e-08	1.27264e-06	PALM3	342979	10.499	10.6686	10.5217	11.1923	11.2454	11.3241	10.7565	10.8166	10.7865	10.7634	10.8066	10.5445	10.8851	10.8947	10.8919	11.0651	11.1103	11.0348	11.1375	10.8596	10.8703	11.4706	11.6765	11.4285	9.6969	9.53292	8.49972	9.83674	10.2019	9.77887	PALM3	342979	-0.286973	0.287891	-0.428703	0.147035	-0.651446	1.8627e-08	-0.262431	0.161708	-0.551758
ENSG00000171450	5886.42	-0.329522	0.0603731	-5.45809	4.81285e-08	1.28823e-06	CDK5R2	8941	12.4358	12.5275	12.3283	12.7274	12.8057	12.6221	12.4377	12.6914	12.6279	12.5345	12.4645	12.3646	12.5697	12.3382	12.4808	12.5867	12.8473	12.7614	12.894	12.6386	12.769	12.8552	12.8724	13.0774	12.2209	11.89	11.2408	12.0249	12.2349	12.0306	CDK5R2	8941	-0.141983	0.98067	-0.206525	0.324274	-0.473287	0.000642189	-0.319105	0.0825147	-0.414336
ENSG00000159199	2078.63	-0.318678	0.0584048	-5.45636	4.85984e-08	1.29913e-06	ATP5MC1	516	10.8048	10.8094	10.6928	11.0249	10.9455	11.0711	10.7896	11.084	11.0419	11.4495	11.312	11.3759	10.4865	10.4481	10.6716	11.2058	11.3962	11.0767	11.7211	11.4593	11.5243	10.692	11.2672	11.0321	11.1613	10.8037	10.3904	10.8851	11.1021	10.9862	ATP5MC1	516	-0.255233	0.665659	-0.177574	0.774644	-0.490846	0.00118149	-0.19742	0.497848	-0.389074
ENSG00000242540	23.9125	0.905545	0.166017	5.45453	4.91033e-08	1.30891e-06	NA	NA	6.23097	6.6559	6.6792	6.33035	6.33742	6.24586	6.24675	6.18251	6.32817	6.06618	6.01468	6.19857	6.37741	6.37227	6.27863	6.30572	6.28339	6.11647	5.59338	5.82555	5.43012	5.73949	5.79249	5.43281	5.56675	5.84939	6.14177	5.87157	5.67446	5.58004	NA	NA	0.0287922		3.72222		1.812		1.36302		1.10961
ENSG00000105856	536.993	0.3065	0.0561929	5.45443	4.91311e-08	1.30891e-06	HBP1	26959	8.94162	8.9447	9.047	8.87385	8.84139	8.93629	9.11984	9.04115	8.99984	9.36275	9.32345	9.27576	8.93304	8.97153	9.0956	8.94165	8.78572	8.92581	9.03639	9.18252	9.01324	8.79265	8.3991	8.75778	9.64504	9.88655	10.3196	9.96992	9.53274	9.58898	HBP1	26959	0.18958	0.868051	0.615005	0.133005	0.391429	0.00438017	0.264247	0.166007	0.505969
ENSG00000129946	5379.09	0.274104	0.0502542	5.45435	4.91525e-08	1.30891e-06	SHC2	25759	12.595	12.6752	12.4829	12.4066	12.3097	12.3904	12.4156	12.6686	12.4935	12.4795	12.5623	12.3172	12.9596	12.8105	12.8406	12.3013	12.5165	12.4584	12.1208	11.9416	12.1102	12.1911	12.3737	12.4595	12.1678	12.2295	12.0487	12.245	12.0916	11.9104	SHC2	25759	0.107749	0.9999	0.237982	0.288305	0.533981	0.00270966	0.399885	0.080484	0.114818
ENSG00000113645	573.848	-0.376265	0.0690701	-5.44758	5.10584e-08	1.35793e-06	WWC1	23286	8.94633	8.43578	8.42245	8.75532	8.78692	8.74181	8.03977	8.14546	7.86612	9.64409	9.27329	9.68284	9.25879	9.18032	9.13385	8.29635	8.41256	8.37085	10.0029	10.2717	10.2074	9.62655	9.62819	9.66648	9.68294	9.54602	9.32599	9.7806	9.75364	9.7167	WWC1	23286	-0.407676	0.9999	-0.243419	0.371763	-0.484692	0.682924	-0.661751	0.698067	-0.167799
ENSG00000130643	5122.16	-0.34225	0.0628378	-5.44656	5.13525e-08	1.36401e-06	CALY	50632	12.3687	12.5887	12.3469	12.9011	12.9314	12.9408	12.3418	12.3325	12.3386	12.2176	12.096	12.1071	12.5451	12.4062	12.3205	12.5356	12.877	12.7091	12.3009	12.0775	12.2626	12.5923	13.071	12.8063	11.4209	11.0525	10.5292	11.1768	11.361	11.0505	CALY	50632	-0.374892	0.0693517	-0.254128	0.467309	-0.410498	0.00464332	-0.0779012	0.884747	-0.350838
ENSG00000115828	568.84	0.430963	0.0791323	5.44611	5.14833e-08	1.36575e-06	QPCT	25797	10.2763	10.25	10.186	9.98896	10.1254	10.1273	9.31952	9.26385	9.21255	9.60126	9.80273	9.44469	8.90685	8.72995	8.246	9.05224	9.08139	9.24109	9.16394	9.16696	9.02696	7.89253	8.31828	8.16267	8.53173	8.80277	8.70237	8.90318	8.03701	8.05901	QPCT	25797	0.158107	0.993003	0.25214	0.407036	0.616214	0.000400904	0.544331	0.00265509	0.671868
ENSG00000135447	4908.69	-0.258545	0.0474831	-5.445	5.1806e-08	1.37256e-06	PPP1R1A	5502	12.5701	12.6755	12.582	12.8499	12.7732	12.7955	12.1646	12.3682	12.4354	12.1712	12.0815	11.9266	12.0719	11.8764	11.9944	12.3649	12.5322	12.5196	12.4766	12.1339	12.2115	12.1691	12.4025	12.3556	12.0491	11.6902	11.3131	11.6846	11.9835	11.8242	PPP1R1A	5502	-0.143461	0.9999	-0.1176	0.771893	-0.330362	0.322991	-0.222486	0.733112	-0.390559
ENSG00000235026	126.798	-0.466723	0.0857476	-5.44298	5.23952e-08	1.38641e-06	DPP10-AS1	389023	7.49903	7.69364	7.34055	7.77624	7.79884	7.42398	6.76493	6.89003	6.95022	8.31347	8.21116	8.33174	6.22665	6.28527	6.33287	7.18741	7.39152	7.38582	8.75207	8.73167	8.56329	6.68307	6.61979	6.54003	6.85296	6.57816	6.34156	6.84223	6.90503	6.86833	DPP10-AS1	389023	-0.672462	0.0918827	0.266145	0.826602	-0.653049	0.0451836	-0.467411	0.0458875	-0.46307
ENSG00000145861	39.462	0.599945	0.110259	5.44125	5.29067e-08	1.39817e-06	C1QTNF2	114898	6.87676	6.90619	6.99289	6.6312	6.5228	6.46756	6.37877	6.53792	6.66604	6.22415	6.10371	5.94795	6.76197	6.62697	6.51214	6.18652	6.31633	6.65085	6.12066	5.57965	5.79579	6.09474	6.28397	6.13656	6.43228	6.6961	6.47675	6.5961	6.26666	6.30039	C1QTNF2	114898	0.281868	0.9999	0.369555		0.941088	0.143477	0.637435		0.506347
ENSG00000120738	877.877	1.10065	0.202292	5.44091	5.30078e-08	1.39907e-06	EGR1	1958	11.9839	11.6922	11.5202	10.4216	10.3986	10.4131	7.8785	7.66699	7.75175	9.82452	9.87946	9.85965	10.2847	9.98909	9.11148	6.92794	7.08197	7.11662	9.53164	9.27249	9.26164	7.81926	8.1004	7.63176	9.50102	9.00439	10.4772	8.75642	8.80803	9.54452	EGR1	1958	1.02703	0.0934214	2.29923	1.31774e-08	2.30206	9.67408e-13	0.530199	0.409103	0.316329
ENSG00000163626	713.335	-0.169792	0.0312098	-5.44034	5.31786e-08	1.4018e-06	COX18	285521	9.56399	9.59837	9.65199	9.79292	9.7788	9.72497	9.30993	9.49582	9.32079	9.5167	9.44344	9.41304	9.61059	9.54574	9.58379	9.63047	9.61268	9.63354	9.71754	9.71606	9.58254	9.74344	9.7159	9.83114	9.47572	9.51352	9.45001	9.40021	9.52877	9.53903	COX18	285521	-0.257681	0.0952413	-0.1678	0.697802	-0.194721	0.0521517	-0.23295	0.0610195	-0.0678846
ENSG00000196961	6674.48	-0.155602	0.0286043	-5.43981	5.3338e-08	1.40423e-06	AP2A1	160	12.6633	12.7098	12.5586	12.8704	12.8617	12.8286	12.7722	12.9371	12.8988	12.6413	12.6404	12.5483	12.5963	12.5317	12.6629	12.9056	13.0721	12.9644	12.8684	12.6184	12.683	12.7121	12.7882	12.8128	12.6384	12.4177	12.3719	12.499	12.626	12.5085	AP2A1	160	-0.106704	0.98067	-0.11294	0.584798	-0.17203	0.180997	-0.119096	0.594978	-0.16682
ENSG00000180998	1413.76	0.486752	0.0894921	5.43905	5.3566e-08	1.40846e-06	GPR137C	283554	11.1176	11.1613	11.2059	11.1279	11.1357	11.0419	10.5785	10.3665	10.4968	10.2246	10.238	9.90169	11.2476	11.1163	10.6219	10.4278	10.4407	10.436	9.60532	9.29413	9.10666	10.2175	10.2	9.84681	10.0246	10.458	10.4982	10.525	9.93248	9.98037	GPR137C	283554	0.0540384	0.9999	0.173513	0.609783	0.961466	2.55757e-11	0.831713	3.28563e-07	0.53565
ENSG00000221818	707.423	-0.40821	0.075075	-5.43736	5.40755e-08	1.41853e-06	EBF2	64641	9.14796	9.02339	9.01938	8.92465	9.17376	9.0549	8.00416	7.9487	8.12937	9.33976	9.17161	9.54632	10.4083	10.3361	10.0903	8.16592	8.16569	8.07893	9.93785	9.96543	9.9274	11.1795	10.951	10.8576	9.24279	8.7091	9.05001	8.81402	9.07918	9.43164	EBF2	64641	-0.128696	0.9999	-0.545434	0.136244	-0.741234	0.281381	-0.627565	0.56265	-0.443885
ENSG00000211456	1504.36	-0.155707	0.0286366	-5.43733	5.40852e-08	1.41853e-06	SACM1L	22908	10.4402	10.3697	10.4478	10.7199	10.6599	10.6146	10.5825	10.6014	10.5995	10.3663	10.3922	10.4876	10.3003	10.3763	10.3326	10.7354	10.6615	10.7527	10.6032	10.6509	10.4936	10.6445	10.4745	10.4064	10.9038	10.7598	10.9021	10.8222	10.9036	10.8941	SACM1L	22908	-0.121862	0.923629	-0.38971	0.0358015	-0.178168	0.123983	-0.176258	0.251029	-0.0781877
ENSG00000095397	951.488	-0.281499	0.0517741	-5.43707	5.41649e-08	1.41883e-06	WHRN	25861	9.1843	9.3663	8.99121	9.33803	9.3745	9.34494	9.18429	9.1587	9.1532	10.6629	10.4626	10.7366	9.51787	9.40474	9.64108	9.33149	9.62417	9.46126	10.8388	11.0129	11.1932	9.6963	9.78582	9.78104	10.3366	10.101	9.80107	10.2169	10.2033	10.2567	WHRN	25861	-0.336089	0.9999	-0.246283	0.347373	-0.244254	0.811241	-0.411372	0.779567	-0.22893
ENSG00000277972	363.532	-0.325987	0.059965	-5.43629	5.44021e-08	1.42326e-06	CISD3	284106	7.95347	8.05639	7.89908	8.14834	8.31415	8.41561	8.28649	8.31814	8.39304	9.37411	9.23751	9.22692	8.2041	8.05447	8.31065	8.45534	8.77542	8.49355	9.6582	9.39101	9.48001	8.3136	8.54815	8.65432	9.06476	8.73638	8.42295	8.81611	9.00798	8.7673	CISD3	284106	-0.286939	0.995764	-0.0662902	0.946362	-0.377417	0.396049	-0.254757	0.769522	-0.323988
ENSG00000136044	326.166	0.368982	0.0678959	5.43454	5.49395e-08	1.43552e-06	APPL2	55198	8.75529	8.76766	8.71495	8.25601	8.5346	8.71235	8.49658	8.49619	8.54915	8.70086	8.91373	8.95418	8.84298	8.76141	8.71084	8.29635	8.29449	8.22823	8.55466	8.50223	8.65473	8.33985	8.34768	8.19391	8.31492	8.51832	9.05614	8.43559	8.24009	8.51502	APPL2	55198	0.289919	0.94158	0.157905	0.83319	0.561371	0.0271089	0.328369	0.444945	0.384009
ENSG00000188021	3523.57	-0.150501	0.0277096	-5.43137	5.59245e-08	1.45943e-06	UBQLN2	29978	11.7852	11.827	11.7823	12.014	12.0335	11.9641	11.807	11.798	11.8253	11.577	11.4648	11.5007	11.8665	11.8819	11.7591	11.8163	11.7938	11.9123	11.7831	11.636	11.6608	12.0979	12.0331	11.9964	11.8085	11.7063	11.525	11.7407	11.7875	11.7437	UBQLN2	29978	-0.0266193	0.9999	-0.115695	0.59489	-0.205547	0.00311794	-0.183621	0.0353183	-0.124424
ENSG00000280594	13.522	1.14093	0.210146	5.42924	5.6593e-08	1.47503e-06	BTG3-AS1	110806272	6.23097	5.9472	5.85941	5.43615	5.47137	5.76623	5.61077	5.80455	5.31454	6.38742	5.86344	6.31867	6.09283	6.06499	6.1818	5.37473	5.31045	5.44346	5.89579	5.57965	5.85182	5.55439	5.58202	5.50219	5.68359	5.72949	5.99874	5.71869	5.48399	5.65337	BTG3-AS1	110806272	1.04705		1.79167		1.76127		1.14403		0.704017
ENSG00000160049	1728.32	-0.182704	0.0336588	-5.42811	5.69553e-08	1.48261e-06	DFFA	1676	10.7813	10.9305	10.8365	10.9327	10.9932	10.9524	10.6879	10.682	10.68	10.5487	10.5542	10.6542	10.4704	10.5363	10.5786	10.7147	10.7467	10.6408	10.9156	10.8632	10.8188	10.7551	10.7999	10.8105	11.058	10.9418	10.6995	10.9766	11.0653	11.1239	DFFA	1676	-0.0143209	0.9999	-0.252295	0.272208	-0.265868	0.0869039	-0.29089	0.111141	-0.212593
ENSG00000175155	421.904	0.535473	0.0987101	5.4247	5.80507e-08	1.50925e-06	YPEL2	388403	8.16397	8.35901	8.31243	8.04111	7.94848	8.12619	7.96763	7.76065	8.06153	8.88323	8.80366	8.95017	8.40547	8.43905	8.44617	7.91213	7.79597	7.92233	8.35442	8.47077	8.35339	7.36755	7.5052	7.37927	9.99441	10.1621	10.9076	10.0449	9.88188	10.068	YPEL2	388403	0.0769203	0.9999	0.407471	0.264704	1.29184	0.00166371	0.56043	0.443698	0.453896
ENSG00000126243	1297.25	-0.175612	0.0323772	-5.42395	5.82959e-08	1.51373e-06	LRFN3	79414	10.5322	10.5221	10.4129	10.6004	10.6624	10.5814	10.4027	10.397	10.3897	10.1556	10.1972	9.94255	10.4598	10.4594	10.4041	10.4376	10.4293	10.5982	10.4079	10.1166	10.1186	10.749	10.7151	10.7027	10.3238	10.1189	10.0874	10.1194	10.3053	10.2919	LRFN3	79414	-0.0918634	0.995764	-0.115453	0.762675	-0.288232	0.00372899	-0.127353	0.554751	-0.211725
ENSG00000065911	3252.88	0.230142	0.0424603	5.42016	5.95443e-08	1.54423e-06	MTHFD2	10797	11.1648	11.1735	11.3381	11.0145	10.968	10.8599	10.805	10.7608	10.8351	12.0655	12.3797	12.1729	12.0102	12.1439	12.1634	10.7989	10.7081	10.7513	12.1349	11.8804	11.9063	11.9005	11.7317	11.8756	11.9384	12.1779	11.9662	12.3282	11.8634	11.8343	MTHFD2	10797	0.0533907	0.9999	0.722745	1.11337e-06	0.276818	0.114694	0.234848	0.333858	0.287339
ENSG00000132510	1536.7	0.298254	0.0550975	5.41321	6.19062e-08	1.60349e-06	KDM6B	23135	10.6289	10.5828	10.5282	10.1928	10.1089	10.3695	10.5765	10.5749	10.3828	10.8308	10.8856	10.9216	11.2613	11.2188	11.0118	10.4446	10.3572	10.2991	10.3644	10.7163	10.7421	10.7196	10.6358	10.8479	10.4054	10.5888	10.9518	10.3312	10.4423	10.3522	KDM6B	23135	0.155936	0.9999	0.633011	0.00104266	0.446739	0.0211244	0.269314	0.387931	0.248519
ENSG00000147724	441.366	-0.359724	0.0664894	-5.41025	6.29363e-08	1.62814e-06	FAM135B	51059	8.81326	8.89631	9.01472	9.22925	9.10874	9.19513	8.195	7.98346	8.29337	9.63939	9.40096	9.62627	8.58485	8.49809	8.71976	8.35733	8.1736	8.54115	10.3609	10.0921	10.2332	8.99938	8.78511	8.74105	7.79938	7.9557	7.63313	7.82354	8.07172	8.08964	FAM135B	51059	-0.239386	0.98067	-0.0300571	0.972856	-0.273092	0.349998	-0.715435	0.00100788	-0.232078
ENSG00000140557	1681.63	0.339471	0.0627513	5.40979	6.30978e-08	1.6303e-06	ST8SIA2	8128	11.6368	11.5263	11.5733	11.2834	11.3276	11.279	10.7262	10.6409	10.7722	10.386	10.3085	10.1763	11.7034	11.4876	11.2285	10.7101	10.4145	10.4643	10.0802	10.2256	9.94674	11.0807	10.8679	10.8224	9.23294	9.55113	10.0576	9.46187	9.29054	9.43411	ST8SIA2	8128	0.188917	0.98067	0.14163	0.767852	0.575251	0.00155421	0.212624	0.596858	0.417641
ENSG00000147400	1043.49	-0.269115	0.0497591	-5.40835	6.36074e-08	1.64143e-06	CETN2	1069	10.1039	10.1852	10.186	10.7011	10.61	10.5616	10.1061	10.2158	10.1721	9.95304	9.9201	9.90376	9.80319	9.80576	9.80736	10.4021	10.4029	10.3011	10.0387	9.96767	9.87536	10.1547	10.4559	10.1096	9.84481	9.67765	9.5225	9.83229	9.84902	9.74792	CETN2	1069	-0.20831	0.723222	-0.318742	0.35073	-0.465194	0.000203304	-0.0400361	0.954089	-0.142764
ENSG00000198934	4923.81	-0.237394	0.0438963	-5.40808	6.37051e-08	1.64192e-06	MAGEE1	57692	12.2093	12.3584	12.3062	12.522	12.4671	12.4592	12.577	12.5785	12.6384	11.7588	11.6361	11.7173	11.8955	11.8689	11.971	12.5788	12.6297	12.6934	12.1066	11.875	12.0167	12.3234	12.2358	12.1829	12.4523	12.2866	11.8359	12.3433	12.5384	12.4577	MAGEE1	57692	-0.0318061	0.9999	-0.259309	0.00426212	-0.337176	0.0127206	-0.303416	0.0647809	-0.315375
ENSG00000186510	63.6015	-0.531416	0.0982717	-5.40762	6.38677e-08	1.64205e-06	CLCNKA	1187	6.19435	6.03899	6.09883	6.39705	6.14977	6.46756	7.39621	7.55491	7.32327	6.69733	6.60686	6.70272	5.88937	5.83959	5.84806	7.41628	7.72181	7.35496	6.98281	6.92961	7.21371	6.09474	6.46393	6.25198	7.23236	6.73888	6.68392	6.83933	7.09007	7.09757	CLCNKA	1187	-0.101765	0.9999	-0.841974	0.262779	-1.05678	0.0145025	-0.622058		-0.618613
ENSG00000171798	2053.62	-0.264001	0.0488193	-5.40771	6.38341e-08	1.64205e-06	KNDC1	85442	11.2509	11.232	11.0793	11.5265	11.485	11.5291	11.3293	11.3996	11.3139	10.6779	10.7186	10.6382	10.8363	10.874	10.8187	11.3557	11.5011	11.421	10.9976	10.8608	10.9407	11.0296	11.0006	11.31	10.5692	10.4406	9.92555	10.4276	10.773	10.5169	KNDC1	85442	-0.0751503	0.9999	-0.459268	0.0206576	-0.28259	0.00506075	-0.265749	0.0299764	-0.355226
ENSG00000220205	15696	-0.169999	0.0314745	-5.40115	6.62134e-08	1.70027e-06	VAMP2	6844	13.9724	14.1039	14.1232	14.3219	14.317	14.195	13.864	13.897	13.8196	13.6536	13.8559	13.7473	13.7927	13.8107	13.8819	13.9117	13.9279	13.971	13.8933	13.8577	13.9157	14.0524	14.2802	14.0201	13.9204	13.7302	13.6522	13.8137	13.8294	13.8415	VAMP2	6844	-0.0719998	0.9999	-0.102152	0.782453	-0.291262	0.0177189	-0.136601	0.56804	-0.134522
ENSG00000143412	148.54	0.402115	0.0746629	5.38574	7.21479e-08	1.85038e-06	ANXA9	8416	7.73922	7.96467	7.92941	7.59693	7.6725	7.68469	7.78331	7.84841	7.59111	7.00752	7.26986	7.14902	8.08515	8.18331	7.83643	7.57099	7.79597	7.5027	6.88204	6.82842	6.78712	7.50398	7.49455	7.23917	7.78014	7.89035	8.11091	7.98236	7.77109	7.75161	ANXA9	8416	0.156762	0.9999	0.490647	0.544903	0.828377	1.88154e-05	0.483785	0.2267	0.286748
ENSG00000127948	2350.81	-0.195052	0.0362402	-5.38221	7.35755e-08	1.88467e-06	POR	5447	11.3303	11.3123	11.1645	11.3836	11.3995	11.4147	11.0662	11.3154	11.1838	11.1189	11.0002	10.9549	11.202	11.1581	11.1681	11.3211	11.4228	11.4064	11.3495	11.0828	11.2419	11.3818	11.5876	11.4298	11.2069	10.9486	10.8798	11.1101	11.142	11.0183	POR	5447	-0.189775	0.723943	-0.180996	0.548314	-0.296542	0.0196359	-0.208772	0.265566	-0.148774
ENSG00000139354	400.748	0.477095	0.0886562	5.38141	7.39043e-08	1.88614e-06	GAS2L3	283431	8.67794	8.64987	8.78781	8.48393	8.57809	8.52153	8.4795	8.54323	8.673	9.04852	8.83064	9.2236	8.78137	8.76987	8.50937	8.52599	8.54606	8.55447	8.64513	8.72636	8.68395	7.63881	7.68414	7.71242	9.02769	9.54927	9.86714	9.76379	9.42483	9.27984	GAS2L3	283431	0.0372418	0.9999	1.16487	0.000235539	1.24257	1.2709e-12	0.405584	0.119412	0.514018
ENSG00000108561	2307.44	-0.196421	0.0364972	-5.3818	7.37442e-08	1.88614e-06	C1QBP	708	11.1465	11.1157	11.0546	11.2931	11.2217	11.2326	11.1544	11.3078	11.3166	11.325	11.3043	11.2474	10.8205	10.77	10.9734	11.3036	11.3954	11.3713	11.5445	11.3975	11.4373	11.1513	11.3416	11.2538	11.2481	10.9846	10.8948	11.087	11.1114	11.079	C1QBP	708	-0.0910728	0.995764	-0.212178	0.517862	-0.401797	1.90643e-05	-0.173625	0.266491	-0.164469
ENSG00000161203	15283.7	-0.161852	0.0300754	-5.38154	7.38522e-08	1.88614e-06	AP2M1	1173	13.8092	13.8868	13.7911	14.0103	13.9729	13.9389	13.7458	13.9145	13.8899	13.9476	13.9884	13.9519	13.7529	13.661	13.7575	13.9258	14.0418	13.9976	14.2275	14.0446	14.0435	13.8268	14.0144	13.914	13.9961	13.7707	13.5573	13.8508	13.9004	13.843	AP2M1	1173	-0.132678	0.955385	-0.0298657	0.905208	-0.193526	0.168424	-0.147041	0.511401	-0.186439
ENSG00000157193	3181.36	-0.246319	0.0457812	-5.38035	7.43407e-08	1.89496e-06	LRP8	7804	11.8195	11.6986	11.7568	11.9311	11.9705	11.9033	12.0289	11.9309	11.9154	11.2268	11.2792	11.2343	11.4604	11.4219	11.3593	12.1341	12.0751	12.1483	11.4791	11.4489	11.4365	11.7785	11.4618	11.6483	11.3852	11.3168	10.8948	11.2643	11.7839	11.6179	LRP8	7804	-0.157848	0.998547	-0.280628	0.346443	-0.221763	0.381035	-0.214208	0.577555	-0.444726
ENSG00000067445	6333.09	-0.127059	0.023622	-5.37886	7.49597e-08	1.90841e-06	TRO	7216	12.6378	12.6659	12.7001	12.7911	12.8355	12.8773	12.9025	12.8213	12.8289	12.3469	12.4529	12.3219	12.6887	12.7733	12.714	12.8715	12.88	12.8782	12.5232	12.503	12.4953	12.9395	12.9885	12.8778	12.3363	12.1093	12.2024	12.1544	12.2218	12.1842	TRO	7216	-0.0207761	0.9999	-0.12894	0.306791	-0.208789	0.132395	-0.135332	0.586369	-0.0987025
ENSG00000139645	5541.33	-0.147076	0.0273753	-5.37257	7.76223e-08	1.97378e-06	ANKRD52	283373	12.4843	12.4668	12.4286	12.5461	12.6545	12.6798	12.6124	12.6001	12.5863	12.218	12.0104	12.2085	12.1028	12.045	12.0299	12.6391	12.5679	12.619	12.3499	12.3374	12.3202	12.1691	12.1269	12.2584	12.6785	12.5733	12.5295	12.5106	12.8143	12.8091	ANKRD52	283373	-0.00471407	0.9999	-0.00686296	0.989953	-0.124638	0.55197	-0.190635	0.434582	-0.236077
ENSG00000120256	1575.6	-0.165303	0.0307762	-5.37112	7.82471e-08	1.98725e-06	LRP11	84918	10.7099	10.7765	10.787	10.9377	10.9036	10.8948	10.7226	10.5959	10.6403	10.555	10.5133	10.5772	10.6769	10.6692	10.5916	10.7869	10.6475	10.82	10.8465	10.7648	10.7212	10.8768	10.8476	10.6897	10.5034	10.3545	10.1405	10.4098	10.4671	10.4144	LRP11	84918	-0.100225	0.98067	-0.0402515	0.925895	-0.162028	0.153996	-0.238928	0.0459361	-0.164888
ENSG00000174576	38.3112	-1.0048	0.187137	-5.36936	7.90172e-08	2.00436e-06	NPAS4	266743	6.51552	6.86421	6.51613	7.09338	7.24664	7.31326	6.14893	5.75094	6.189	6.67765	6.6601	6.47767	5.72286	5.86754	5.75755	6.15452	5.77342	6.11647	6.65285	7.25539	6.87585	6.38457	6.83052	6.7177	5.50629	5.20902	4.98814	5.18969	5.27793	5.3234	NPAS4	266743	0.018542	0.9999	-3.09826	0.0458203	-2.02628	9.19045e-08	-0.592955	0.307303	-1.57996
ENSG00000108671	2195.37	-0.132519	0.0247134	-5.36224	8.21951e-08	2.08244e-06	PSMD11	5717	10.8519	10.9245	10.9454	11.0491	11.0766	10.9992	11.1901	11.1316	11.2014	10.9549	10.9715	10.9786	10.911	10.8733	10.9628	11.2447	11.2741	11.1987	11.0523	11.0704	11.0564	11.1017	11.2136	11.0759	11.4304	11.3886	11.2352	11.4029	11.5015	11.4939	PSMD11	5717	-0.062292	0.9999	-0.247664	0.12367	-0.218328	0.0417435	-0.0956125	0.697263	-0.136724
ENSG00000066135	1961.47	0.179402	0.0334617	5.36143	8.25645e-08	2.08926e-06	KDM4A	9682	11.1718	11.0718	11.1338	10.9861	10.9393	10.9216	11.1013	11.1162	11.1848	10.8441	10.9123	10.7482	10.9429	11.0076	10.969	10.9704	10.9255	10.9868	10.8414	10.4199	10.5548	10.8679	10.5913	10.8557	11.0888	11.1977	11.2517	11.1869	11.1015	11.101	KDM4A	9682	0.183275	0.843746	0.196612	0.460838	0.205904	0.214153	0.226065	0.28008	0.114009
ENSG00000133265	1546.65	-0.256211	0.0478005	-5.36002	8.3214e-08	2.10315e-06	HSPBP1	23640	10.8951	10.8929	10.7992	11.2088	11.2242	11.2005	10.2633	10.7053	10.5157	10.5772	10.5955	10.5068	10.3758	10.3493	10.4123	10.6629	10.7215	10.7627	10.7831	10.5041	10.6581	10.5994	10.9453	10.8672	10.4105	10.156	10.0384	10.2652	10.2947	10.2266	HSPBP1	23640	-0.211914	0.995324	-0.318257	0.372301	-0.445401	0.102351	-0.0974976	0.92502	-0.1669
ENSG00000141314	316.799	-0.398225	0.0742998	-5.3597	8.33603e-08	2.10429e-06	RHBDL3	162494	8.864	8.78372	8.88803	9.5006	9.54244	9.4731	8.21585	8.2416	7.99025	8.99797	8.75939	9.0397	7.81728	7.61566	7.24546	8.36922	8.39917	8.52771	9.29229	9.37079	9.43274	7.68098	7.84262	7.55589	7.50215	7.32366	7.07214	7.54519	7.47257	7.5626	RHBDL3	162494	-0.331361	0.793072	-0.46864	0.146382	-0.152399	0.706968	-0.473634	0.0784075	-0.257099
ENSG00000124766	4441.44	0.274081	0.0511503	5.35834	8.39913e-08	2.11766e-06	SOX4	6659	12.7394	12.7167	12.6617	12.5298	12.4129	12.2996	12.4016	12.4776	12.5725	11.8479	11.9608	11.6876	12.412	12.3483	12.172	12.4991	12.5249	12.4549	11.5799	11.4401	11.4027	11.7289	11.7284	11.9613	11.502	11.605	11.8894	11.5326	11.4776	11.4486	SOX4	6659	-0.00293935	0.9999	0.427495	0.0155819	0.513899	0.11343	0.365143	0.483149	0.205663
ENSG00000144560	972.984	0.327947	0.0612079	5.35792	8.41869e-08	2.12002e-06	VGLL4	9686	10.3366	10.1004	10.1161	9.88535	9.93051	9.85541	9.92657	9.89811	9.88214	10.025	10.1165	9.94657	9.80834	9.72564	9.76505	9.67398	9.68578	9.84243	9.88954	9.75295	9.72102	9.32096	9.1094	9.47044	10.3789	10.4801	11.108	10.37	10.2299	10.3426	VGLL4	9686	0.182452	0.98067	0.455536	0.138469	0.498928	0.0098584	0.254	0.453334	0.378733
ENSG00000049246	228.933	-0.402435	0.0751247	-5.3569	8.46612e-08	2.1294e-06	PER3	8863	7.99999	7.84607	7.77072	8.11349	8.371	8.20123	7.97991	7.81009	7.93432	7.61298	7.75719	7.99016	7.62905	7.97309	8.17826	8.47745	8.54606	8.42266	8.01604	7.93632	8.14977	8.2936	8.12103	8.3952	8.19269	8.21427	8.39133	8.17614	8.60444	8.50751	PER3	8863	-0.697297	0.0186189	-0.4324	0.445454	-0.404477	0.132058	-0.307219	0.516058	-0.222103
ENSG00000261716	142.129	0.479977	0.0896415	5.35441	8.58364e-08	2.14859e-06	H2BC20P	337873	7.62433	8.04749	7.45785	7.03666	7.17533	7.53621	8.00416	7.62324	7.8049	7.39062	7.6131	7.31302	7.76988	7.86024	7.47188	7.80154	7.51064	7.43083	6.77266	7.14447	7.39913	7.30071	7.15621	7.11012	7.80256	8.0909	8.05032	8.10225	7.78918	7.80364	H2BC20P	337873	0.290269	0.98067	0.778301	0.302696	0.729559	0.00992714	0.44924	0.353781	0.354871
ENSG00000174276	248.721	-0.394593	0.0736892	-5.35482	8.56398e-08	2.14859e-06	ZNHIT2	741	8.09723	8.19177	7.62933	8.3855	8.51235	8.4364	8.32533	8.39719	8.18618	8.19594	8.09951	7.97429	7.90752	7.94823	7.75093	8.90958	8.89438	8.95114	8.14638	7.86003	8.06292	7.93645	8.05105	8.24846	8.31271	7.96419	7.9476	8.0567	8.52395	8.27955	ZNHIT2	741	-0.705491	0.0855025	-0.366536	0.638914	-0.265899	0.527311	0.0794866	0.957058	-0.473242
ENSG00000144136	2120.84	-0.242388	0.0452637	-5.35502	8.5545e-08	2.14859e-06	SLC20A1	6574	10.6834	10.8198	10.7456	10.8355	10.9121	10.8309	10.9538	10.9187	11.0144	11.2992	11.2436	11.3025	10.8357	10.8569	11.083	11.0687	11.0783	11.0744	11.5162	11.4279	11.4543	11.3981	11.4019	11.4181	11.0031	10.8918	10.5961	10.9948	11.2547	11.0966	SLC20A1	6574	-0.109212	0.997505	-0.309929	0.0125944	-0.485314	2.35022e-05	-0.189834	0.351384	-0.294323
ENSG00000136478	2841.64	-0.213959	0.0399587	-5.3545	8.57919e-08	2.14859e-06	TEX2	55852	10.9789	11.0411	11.0603	11.227	11.2183	11.2207	10.9353	10.9559	10.9728	11.8382	11.6323	11.8195	11.1769	11.2918	11.4563	11.0096	10.9278	11.0454	12.2397	12.1001	12.07	11.735	11.4731	11.6737	11.7453	11.6442	11.6326	11.7198	11.7489	11.8524	TEX2	55852	-0.0366759	0.9999	-0.202696	0.480126	-0.321599	0.398457	-0.379154	0.435506	-0.122163
ENSG00000103888	868.771	-0.422015	0.0788415	-5.35271	8.66487e-08	2.16632e-06	CEMIP	57214	8.4771	8.79433	8.41538	8.97852	9.09388	9.24291	8.78056	8.53161	8.60947	10.3186	9.96692	10.2914	8.5575	8.41401	8.33803	8.87263	8.7546	9.22873	11.0512	10.9822	11.0497	8.40961	8.53291	8.64535	10.8004	10.7222	10.4302	10.8117	10.738	10.9133	CEMIP	57214	-0.361281	0.9999	-0.235018	0.542254	-0.10603	0.963176	-0.859991	0.679803	-0.161761
ENSG00000172057	1101.92	0.208112	0.0389009	5.34979	8.80544e-08	2.19883e-06	ORMDL3	94103	10.3131	10.213	10.3087	10.2732	10.1291	10.1788	9.89808	9.97478	9.92765	10.5821	10.3574	10.3788	10.4897	10.4331	10.3422	9.87167	9.95047	9.87183	10.184	10.3128	10.2014	9.94999	10.1109	10.0534	10.0369	10.1799	10.3206	10.1804	9.91907	10.0008	ORMDL3	94103	0.0440493	0.9999	0.122546	0.80545	0.404446	8.87021e-06	0.21874	0.099904	0.25008
ENSG00000273142	201.929	0.538681	0.100702	5.34927	8.831e-08	2.20257e-06	NA	NA	7.84534	8.13413	8.19316	7.82039	7.5447	7.96297	7.58717	7.86719	7.61523	8.0101	8.18617	8.15378	7.50506	7.77774	7.75093	7.80154	7.83664	7.76931	7.03973	7.24009	7.60023	7.32784	7.43998	6.98214	8.3303	8.96655	9.1343	8.91817	8.25415	8.42425	NA	NA	-0.128211	0.9999	1.25782	0.0563927	0.58688	0.0229188	1.06112	7.80632e-06	0.76816
ENSG00000106266	1003.96	0.173553	0.0324524	5.34791	8.89774e-08	2.21657e-06	SNX8	29886	10.0194	10.0505	9.92391	9.74015	9.76949	9.83415	9.86574	10.0002	9.94407	10.0728	9.97659	9.96254	10.2689	10.2544	10.2924	9.83168	9.88515	10.0414	9.78513	9.79652	9.86014	10.0262	9.98287	10.1306	10.2426	10.2931	10.5033	10.3358	10.2119	10.2049	SNX8	29886	0.0239363	0.9999	0.390049	0.106606	0.238662	0.226111	0.20107	0.527861	0.162503
ENSG00000101146	1218.11	0.154247	0.0288563	5.34535	9.02418e-08	2.24539e-06	RAE1	8480	10.4133	10.5125	10.4886	10.2945	10.2808	10.2837	10.3288	10.3402	10.3585	10.2815	10.2893	10.2562	10.5127	10.5081	10.4626	10.1722	10.1424	10.2141	10.0995	10.0525	10.1292	10.2436	10.411	10.2693	10.3987	10.3574	10.2757	10.4376	10.2493	10.2553	RAE1	8480	0.179043	0.98067	0.267969	0.44546	0.195736	0.408305	0.189226	0.613717	0.0550908
ENSG00000176058	645.021	-0.290721	0.0544316	-5.34104	9.2417e-08	2.29554e-06	TPRN	286262	9.53305	9.63414	9.31643	9.75703	9.61439	9.63616	9.28076	9.53689	9.6953	9.01623	8.85187	8.99369	9.52726	9.40112	9.3857	9.38195	9.87557	9.65215	9.39632	9.21692	9.25	9.73118	9.81747	9.89283	9.50054	9.13971	8.92262	9.17229	9.34778	9.34155	TPRN	286262	-0.135646	0.9999	-0.374686	0.331954	-0.401191	0.0289203	-0.369728	0.132579	-0.349303
ENSG00000116005	5563.21	-0.131837	0.0246844	-5.34092	9.24776e-08	2.29554e-06	PCYOX1	51449	12.3116	12.331	12.4626	12.4955	12.5707	12.4975	12.6589	12.5573	12.599	12.2545	12.2109	12.2755	12.1004	12.149	12.204	12.6461	12.6662	12.7463	12.4844	12.4109	12.3248	12.4177	12.2079	12.2977	12.575	12.539	12.4821	12.57	12.6707	12.655	PCYOX1	51449	-0.0773603	0.995764	-0.101591	0.762675	-0.156861	0.125228	-0.164112	0.192439	-0.107502
ENSG00000198133	2484.5	-0.215846	0.040416	-5.34062	9.26314e-08	2.29662e-06	TMEM229B	161145	11.0439	11.1115	11.0804	11.3423	11.2907	11.2819	10.9584	10.9591	10.9121	11.2516	11.1357	10.9913	11.2044	11.1783	11.2628	10.8566	11.0657	11.1406	11.4905	11.1633	11.2729	11.5887	11.6321	11.6776	11.716	11.5698	11.4954	11.5949	11.7581	11.6041	TMEM229B	161145	-0.0797157	0.9999	-0.230934	0.105106	-0.423144	0.134045	-0.191107	0.775353	-0.14626
ENSG00000006327	345.422	0.609024	0.114045	5.34019	9.28488e-08	2.29928e-06	TNFRSF12A	51330	7.97226	7.73892	7.6043	7.0172	7.03647	7.24221	7.31957	7.15015	7.27814	9.97928	9.72168	9.78523	9.44542	9.41194	9.04691	6.66651	7.21448	7.17138	9.6754	9.76848	9.7869	8.1149	8.20068	8.33496	8.39337	8.17837	8.80273	8.50128	7.86639	8.10595	TNFRSF12A	51330	0.324184	0.9999	1.07779	7.48637e-07	1.25345	0.218251	0.0927845	0.98884	0.444162
ENSG00000176903	9594.84	-0.234615	0.0439518	-5.338	9.39764e-08	2.32444e-06	PNMA1	9240	13.2296	13.2894	13.1373	13.3828	13.3395	13.2977	13.2822	13.4635	13.5105	12.8401	12.7437	12.7163	13.0288	12.9967	13.0848	13.4737	13.5412	13.5705	13.1834	12.8995	12.9955	13.393	13.4222	13.5156	13.3826	13.1819	12.7738	13.2058	13.3754	13.2404	PNMA1	9240	-0.102358	0.9999	-0.232774	0.0599815	-0.406451	0.000619191	-0.266672	0.0969953	-0.270571
ENSG00000077044	4619.54	0.206821	0.0387521	5.33703	9.44799e-08	2.33412e-06	DGKD	8527	12.4672	12.5634	12.4119	12.4026	12.408	12.4036	12.1021	12.0982	12.1616	12.374	12.3117	12.2358	12.3829	12.3688	12.3747	12.019	12.1005	12.1505	12.0207	11.8863	11.8795	12.1187	11.9995	12.2668	11.7676	12.1371	11.9704	12.2034	11.8946	11.793	DGKD	8527	0.0355267	0.9999	0.239691	0.0635752	0.249102	0.0788259	0.381342	0.00518522	0.289108
ENSG00000233670	1386.01	0.749276	0.140447	5.33493	9.55805e-08	2.35852e-06	PIRT	644139	10.1434	10.3193	10.4059	9.69999	9.69526	9.65613	10.5685	10.4999	10.4418	10.5184	10.7486	10.2513	11.3738	11.5513	11.7411	9.95042	10.0303	10.1281	9.48034	8.9881	8.87333	11.216	10.9867	11.3749	9.66282	10.7453	9.46322	11.0704	10.2624	9.40123	PIRT	644139	0.493246	0.872159	1.08433	1.54868e-06	0.373426	0.496781	1.47339	7.32561e-05	0.792531
ENSG00000141367	21872.7	-0.173803	0.0325803	-5.3346	9.57578e-08	2.3601e-06	CLTC	1213	14.1809	14.1736	14.2618	14.4286	14.4963	14.4346	14.4654	14.3791	14.4704	14.1879	14.1153	14.1606	14.1144	14.1991	14.171	14.4328	14.3825	14.6172	14.5287	14.4101	14.3143	14.4861	14.3485	14.3296	14.6509	14.6144	14.6131	14.7154	14.7369	14.8085	CLTC	1213	-0.0373871	0.9999	-0.0693444	0.866045	-0.225289	0.0383747	-0.267677	0.020179	-0.0883883
ENSG00000116584	847.135	0.589248	0.110506	5.33227	9.69945e-08	2.38494e-06	ARHGEF2	9181	9.86906	9.8724	9.88371	9.5369	9.37757	9.37472	8.79442	8.86312	8.91177	10.393	10.6748	10.2787	10.6276	10.6677	10.4696	8.6381	8.90857	8.59368	9.76384	9.62516	9.74055	9.6371	9.55246	9.8272	9.78825	9.55159	10.8874	9.48345	9.28846	9.74872	ARHGEF2	9181	0.162688	0.992508	0.80512	0.000926483	0.965106	2.14424e-13	0.785315	5.27416e-08	0.522517
ENSG00000154328	1696.36	-0.262194	0.0491702	-5.33237	9.69367e-08	2.38494e-06	NEIL2	252969	10.3945	10.552	10.4632	10.6792	10.6712	10.6647	10.5007	10.6741	10.7891	10.7943	10.7612	10.7812	10.3443	10.4027	10.6501	10.7625	10.7919	10.8255	11.0676	10.9314	10.9152	10.8723	10.9978	11.0097	11.0057	10.8831	10.4994	10.9836	11.0989	11.0404	NEIL2	252969	-0.132456	0.9999	-0.194335	0.496908	-0.50327	0.00480003	-0.201483	0.589947	-0.253752
ENSG00000158480	702.363	0.18179	0.0341023	5.33073	9.78164e-08	2.40232e-06	SPATA2	9825	9.59429	9.59837	9.63997	9.5238	9.45513	9.60682	9.30993	9.33213	9.25457	9.83893	9.79182	9.75573	9.79026	9.68905	9.57238	9.2539	9.18989	9.24928	9.57507	9.51592	9.65492	9.30118	9.33048	9.45005	9.67056	9.78095	9.78854	9.81468	9.61284	9.6744	SPATA2	9825	0.0787843	0.9999	0.592723	0.0121771	0.353339	0.00168593	0.22725	0.165279	0.148369
ENSG00000230295	28.0856	0.807904	0.151611	5.32881	9.88558e-08	2.42499e-06	NA	NA	5.98882	6.27288	6.45643	6.29545	6.18341	5.96619	6.19897	5.99109	6.11197	6.33561	6.55118	6.31867	6.17138	6.15054	6.0974	6.12152	5.97479	6.11647	5.51486	5.77087	6.24598	5.55439	5.69446	5.67454	6.13234	6.67414	6.89886	6.77977	6.28128	6.391	NA	NA	0.060763		0.842542		1.43593		1.20518		0.97347
ENSG00000087074	2961.43	0.305941	0.0574228	5.32787	9.93725e-08	2.4348e-06	PPP1R15A	23645	11.6281	11.7035	11.7638	11.5637	11.5414	11.6616	11.126	11.2916	11.2966	11.9376	11.8581	11.7795	12.1518	12.0716	12.0062	11.1775	11.3615	11.3248	11.3575	11.6458	11.5291	11.4838	11.6539	11.6583	10.9884	11.4239	11.5229	11.524	10.8942	10.7825	PPP1R15A	23645	-0.0438364	0.9999	0.424424	0.0187497	0.487225	4.23552e-07	0.348497	0.00259444	0.610564
ENSG00000167700	880.289	-0.266468	0.050034	-5.32573	1.00547e-07	2.46068e-06	MFSD3	113655	9.55169	9.65751	9.51058	9.89554	9.76013	9.9803	9.57704	9.92044	9.87727	10.2246	10.2239	10.0493	9.50049	9.57492	9.65967	9.85916	9.97535	9.93903	10.3924	10.1623	10.4229	9.7938	10.1379	10.1433	9.80553	9.47392	9.45861	9.52524	9.6527	9.60612	MFSD3	113655	-0.123834	0.9999	-0.202431	0.771629	-0.482582	0.00118086	-0.171654	0.59242	-0.223906
ENSG00000184007	3952.96	-0.163808	0.0307612	-5.32515	1.00872e-07	2.46574e-06	PTP4A2	8073	12.1535	12.1921	12.1864	12.4829	12.3835	12.2425	11.9701	11.9347	12.0659	11.6312	11.6099	11.5946	11.777	11.7358	11.5263	11.9675	12.1569	12.1113	11.8858	11.7556	11.7446	11.9505	11.8962	11.8281	12.0279	11.8803	11.8325	11.9664	11.9912	12.0605	PTP4A2	8073	-0.0850053	0.98067	-0.00772722	0.986788	-0.208375	0.0168327	-0.189394	0.080484	-0.137676
ENSG00000164976	932.253	-0.320348	0.0601601	-5.32492	1.00996e-07	2.46589e-06	MYORG	57462	9.27694	8.76227	8.78781	9.14617	8.97724	9.03806	9.67736	9.72373	9.66733	10.1606	10.1889	10.131	9.26629	9.23421	9.68107	9.76843	10.002	9.90324	10.6062	10.3303	10.4554	9.83332	9.59692	9.90036	10.63	10.1835	10.2925	10.3158	10.8448	10.7697	MYORG	57462	-0.21299	0.9999	-0.448734	0.0732108	-0.399108	0.215181	-0.323656	0.515522	-0.509203
ENSG00000184992	520.806	-0.272695	0.0512197	-5.32404	1.01489e-07	2.47504e-06	BRI3BP	140707	9.20803	9.23646	9.20651	9.5434	9.49239	9.40127	9.0977	9.22845	9.22028	8.8097	8.64234	8.69112	9.0978	8.97397	8.76929	8.9535	9.28353	9.13027	9.09306	9.13533	8.91331	9.42208	9.33923	9.28428	9.32579	9.14588	9.0136	9.1399	9.38194	9.42818	BRI3BP	140707	0.0686041	0.9999	0.250901	0.456775	-0.434214	0.0417229	-0.377805	0.199082	-0.3078
ENSG00000125841	3881.22	-0.209384	0.0393297	-5.3238	1.01621e-07	2.47535e-06	NRSN2	80023	11.9328	11.893	11.8438	12.2119	12.2191	12.1815	11.8171	11.9363	11.8454	11.8357	11.8257	11.6786	11.9696	11.9278	11.8172	11.9675	12.144	12.023	12.0386	11.7984	11.8007	12.0646	12.3374	12.1821	11.922	11.7529	11.5267	11.8355	11.8808	11.7603	NRSN2	80023	-0.176608	0.703222	-0.172155	0.470688	-0.293912	0.00957703	-0.105157	0.69874	-0.150018
ENSG00000114784	2755.49	0.17726	0.033306	5.32217	1.02537e-07	2.49474e-06	EIF1B	10289	11.5729	11.6346	11.7217	11.5116	11.4263	11.4614	11.4573	11.3354	11.4199	11.7271	11.7262	11.7173	11.473	11.4978	11.4879	11.3158	11.3718	11.4264	11.5615	11.4751	11.4585	11.1131	11.3539	11.2346	11.3844	11.4215	11.3063	11.5307	11.1838	11.1521	EIF1B	10289	0.038143	0.9999	0.242519	0.368959	0.25697	0.00477018	0.227024	0.0368301	0.179431
ENSG00000136854	17426.2	-0.22731	0.0427391	-5.31855	1.04595e-07	2.54185e-06	STXBP1	6812	14.0462	14.0796	14.0659	14.4462	14.4937	14.4488	14.2227	14.2287	14.2416	13.6839	13.5949	13.6043	14.2295	14.0839	14.0407	14.4381	14.3662	14.5026	13.9224	13.7043	13.7266	14.2983	14.3245	14.2972	13.8693	13.8736	13.3536	13.8768	14.0011	13.8364	STXBP1	6812	-0.201434	0.549477	-0.215697	0.0637357	-0.1838	0.188858	-0.16167	0.416795	-0.184372
ENSG00000163344	879.125	-0.271477	0.0511365	-5.30886	1.10311e-07	2.67764e-06	PMVK	10654	9.82633	9.83959	9.73627	10.1657	10.0057	10.1541	9.54062	9.88682	9.93471	9.7611	9.71013	9.54367	9.76006	9.74431	9.91187	9.92064	10.2314	10.1588	9.94967	9.60223	9.7069	10.0161	10.376	10.1638	9.80201	9.54322	9.49381	9.62172	9.71884	9.71143	PMVK	10654	-0.319932	0.451356	-0.232564	0.7062	-0.405193	0.0198684	-0.0932012	0.881096	-0.207835
ENSG00000069345	3364.89	-0.145253	0.0273658	-5.30782	1.10942e-07	2.68983e-06	DNAJA2	10294	11.7324	11.7852	11.8653	11.9372	11.8643	11.8504	11.6919	11.6464	11.7231	11.5947	11.63	11.5785	11.481	11.5432	11.5955	11.7648	11.7181	11.734	11.8864	11.8314	11.7733	11.8357	11.7471	11.7233	11.797	11.7267	11.5799	11.7944	11.8312	11.8262	DNAJA2	10294	-0.0486853	0.9999	-0.102524	0.617503	-0.229156	1.2939e-05	-0.236163	4.66787e-05	-0.119582
ENSG00000173404	82.696	0.691039	0.130198	5.3076	1.1108e-07	2.69005e-06	INSM1	3642	7.93442	7.45568	7.37084	7.34558	7.17533	6.95865	6.14893	5.80455	6.11197	7.19292	6.91813	6.74316	8.43921	7.9632	7.93257	5.85314	5.65119	5.97847	6.46253	6.76361	6.78712	7.32784	7.45107	7.59435	6.09593	6.76318	6.32844	6.73634	6.47637	6.09289	INSM1	3642	0.530867	0.9999	2.07376	0.0379916	0.871703	0.127404	0.477937	0.717606	0.777542
ENSG00000008853	1638.24	-0.14333	0.0270135	-5.30587	1.12136e-07	2.71246e-06	RHOBTB2	23221	10.996	10.9531	10.9405	11.0399	11.0413	11.0402	10.5785	10.5408	10.6157	10.587	10.5215	10.4371	10.8294	10.7998	10.8748	10.6521	10.5799	10.6408	10.6299	10.5026	10.6164	11.1281	11.0774	11.1345	10.4753	10.3061	10.2595	10.3382	10.4972	10.4816	RHOBTB2	23221	-0.043357	0.9999	-0.171438	0.440311	-0.283353	0.00185547	-0.0712344	0.810341	-0.194175
ENSG00000189077	1358.12	-0.236162	0.0445331	-5.30306	1.13879e-07	2.75143e-06	TMEM120A	83862	10.2725	10.4916	10.397	10.7483	10.7033	10.7089	10.2707	10.5551	10.3759	10.4939	10.5798	10.5418	10.3496	10.4027	10.4679	10.6252	10.774	10.7075	10.6518	10.5347	10.4788	10.5653	10.8978	10.6612	10.188	9.93072	9.77748	10.022	10.112	9.98675	TMEM120A	83862	-0.301919	0.247656	-0.388261	0.158759	-0.316765	0.0283768	-0.0206743	0.98412	-0.197588
ENSG00000056291	17.5764	1.01371	0.191193	5.30203	1.14524e-07	2.76308e-06	NPFFR2	10886	6.42831	6.30732	6.36072	5.91499	6.00293	5.85173	5.98219	5.5636	5.42095	6.2531	6.14545	5.90623	6.27922	6.46858	6.25995	5.5291	5.17199	5.44346	5.84352	6.05787	5.90448	5.73949	6.03368	6.07368	5.20975	5.51753	5.7507	5.84312	5.45893	5.38803	NPFFR2	10886	1.17965	0.998547	0.5075	0.370682	0.895045	0.649475	0.43886		1.497
ENSG00000107771	4460.6	-0.209909	0.0395921	-5.30179	1.14671e-07	2.76308e-06	CCSER2	54462	11.7283	11.7766	11.8978	12.1008	12.1959	12.158	12.0931	11.9618	11.9821	12.0071	11.837	11.9751	11.8068	11.8685	11.8706	12.2611	12.1519	12.254	12.159	12.1349	12.0343	12.159	11.8888	11.923	12.4122	12.5137	12.3126	12.5615	12.7572	12.7039	CCSER2	54462	-0.207697	0.9999	-0.162723	0.695463	-0.14523	0.743592	-0.172683	0.824805	-0.169129
ENSG00000149679	886.802	-0.169542	0.0319791	-5.30165	1.14758e-07	2.76308e-06	CABLES2	81928	9.84408	9.82161	9.8528	10.1208	10.0448	10.0456	10.1604	10.1663	10.2249	9.84913	9.84557	9.80531	9.71286	9.66362	9.65505	10.1939	10.222	10.2673	10.1163	9.93135	10.0731	9.97514	9.82164	9.82324	9.51112	9.38869	9.1974	9.3965	9.40619	9.47585	CABLES2	81928	-0.039917	0.9999	-0.424994	0.0766054	-0.206204	0.0908743	-0.22277	0.136535	-0.148364
ENSG00000253368	2048.18	-0.319159	0.0602177	-5.30008	1.15751e-07	2.78057e-06	TRNP1	388610	11.0073	11.2035	10.9356	11.4464	11.3221	11.2215	10.918	11.0859	11.1769	11.3518	11.0863	11.2252	10.4393	10.2454	10.4105	10.9791	11.487	11.4768	11.7079	11.4672	11.5315	10.6021	10.734	10.9851	10.8477	10.5766	10.1397	10.646	10.6942	10.5933	TRNP1	388610	-0.269018	0.843058	-0.166893	0.604174	-0.427841	0.0481825	-0.355932	0.209804	-0.255208
ENSG00000169021	2650.49	-0.186504	0.0351886	-5.30013	1.15723e-07	2.78057e-06	UQCRFS1	7386	11.1917	11.2835	11.1698	11.4114	11.3221	11.284	11.235	11.3487	11.2811	11.5047	11.5145	11.5184	11.2659	11.2453	11.2944	11.343	11.5181	11.4915	11.7679	11.6381	11.6622	11.3841	11.622	11.515	11.5561	11.3172	11.0179	11.3483	11.3853	11.3644	UQCRFS1	7386	-0.15991	0.419521	-0.269823	0.463214	-0.244424	0.00185547	-0.182776	0.0733208	-0.209236
ENSG00000225190	609.671	0.309455	0.0584339	5.29582	1.18481e-07	2.84211e-06	PLEKHM1	9842	9.42593	9.36984	9.13541	9.0258	9.29884	9.20119	9.27584	9.19583	9.23562	9.67654	9.64189	9.67801	9.91585	9.82343	9.62854	9.1685	9.19761	9.09437	9.28108	9.30837	9.57634	9.29785	9.12637	9.1389	9.1199	9.39284	9.66766	9.40714	9.27165	9.19164	PLEKHM1	9842	0.0934372	0.9999	0.604791	0.0326045	0.658978	7.12947e-05	0.291502	0.301368	0.320496
ENSG00000143845	2946.55	-0.24453	0.0461756	-5.29566	1.18586e-07	2.84211e-06	ETNK2	55224	11.5321	11.5776	11.6045	11.9342	11.8993	11.8638	11.6432	11.7201	11.7122	11.5641	11.4622	11.3669	11.5582	11.4601	11.4173	11.7764	11.8729	11.8936	11.8609	11.5338	11.5857	11.8316	11.8703	11.834	10.9075	10.741	10.3979	10.9583	10.9368	10.7572	ETNK2	55224	-0.152885	0.716201	-0.0581058	0.864887	-0.368914	4.13699e-05	-0.205705	0.115959	-0.158323
ENSG00000078668	5972.52	-0.214137	0.0404463	-5.29436	1.19434e-07	2.85914e-06	VDAC3	7419	12.393	12.4975	12.5753	12.7884	12.7272	12.6965	12.5997	12.6557	12.6137	12.4429	12.4913	12.3969	12.3132	12.3591	12.4223	12.7334	12.8279	12.8043	12.7217	12.5332	12.4862	12.6142	12.798	12.5771	12.5736	12.3871	11.9834	12.4723	12.5103	12.4191	VDAC3	7419	-0.162246	0.847597	-0.210695	0.306791	-0.300676	0.0162079	-0.142779	0.554934	-0.209894
ENSG00000157514	5040.48	-0.307334	0.058111	-5.28874	1.23164e-07	2.94507e-06	TSC22D3	1831	12.1601	12.304	12.2899	12.7004	12.6599	12.5755	12.465	12.4594	12.5077	11.9352	11.9968	11.9563	11.8119	11.8594	12.0529	12.8954	13.0877	12.9789	12.2683	11.9381	11.9838	12.1668	12.2146	12.1466	12.2374	12.1507	11.5278	12.2785	12.362	12.1839	TSC22D3	1831	-0.511357	0.0160666	-0.163907	0.557235	-0.264677	0.223023	-0.110885	0.84475	-0.245302
ENSG00000120129	2073.89	0.267269	0.0505749	5.28461	1.25975e-07	3.00882e-06	DUSP1	1843	11.4973	11.6958	11.5976	11.3562	11.2579	11.2855	10.6429	10.7706	10.78	11.742	11.661	11.6474	10.9377	10.8785	11.0703	10.5701	10.6754	10.6881	11.4929	11.1054	11.1563	10.6432	10.5889	10.8595	10.4077	10.7055	10.3855	10.8028	10.5668	10.2692	DUSP1	1843	0.0964628	0.9999	0.521553	0.00678354	0.273792	0.104946	0.429387	0.00670648	0.229207
ENSG00000242689	13.0974	1.03771	0.196448	5.28237	1.27526e-07	3.04238e-06	CNTF	1270	5.84062	5.66543	5.85941	5.67917	5.38723	5.56126	5.6998	5.29878	5.6581	5.99538	5.68049	5.6608	5.72286	6.06499	6.07517	5.65318	5.50435	5.44346	5.78792	5.57965	5.59973	5.62145	5.4472	5.35366	5.85131	6.26916	6.32182	6.45352	5.83363	5.83881	CNTF	1270	0.0771262		1.5638		1.67882		0.457414		1.25531
ENSG00000171723	1491.09	-0.164258	0.0311085	-5.28018	1.29059e-07	3.07545e-06	GPHN	10243	10.78	10.7711	10.8005	10.9573	11.0238	11.007	10.7565	10.5437	10.7577	10.2754	10.3903	10.3365	10.4091	10.339	10.2694	10.7557	10.6726	10.8035	10.6402	10.5118	10.4108	10.6588	10.5618	10.4997	10.494	10.3571	10.2943	10.4091	10.4289	10.4557	GPHN	10243	-0.054059	0.9999	-0.32136	0.240228	-0.240379	0.0824181	-0.199609	0.312844	-0.113043
ENSG00000157870	2573.18	-0.245758	0.0466125	-5.27235	1.34688e-07	3.20592e-06	PRXL2B	127281	11.2735	11.2845	11.1677	11.4637	11.4671	11.4727	11.2896	11.5133	11.2985	11.4595	11.3441	11.3744	11.4047	11.316	11.3944	11.46	11.6047	11.604	11.6598	11.4295	11.4458	11.673	11.7498	11.8428	10.9563	10.7487	10.3529	10.9075	11.0597	10.8781	PRXL2B	127281	-0.184385	0.740859	-0.171104	0.509807	-0.388923	0.000814662	-0.1257	0.642656	-0.288533
ENSG00000013588	11.616	1.83062	0.347257	5.27167	1.35189e-07	3.21416e-06	GPRC5A	9052	4.83516	4.83516	4.83516	4.83516	5.15519	4.83516	4.83516	4.83516	5.17491	5.87822	6.01468	5.90623	6.93207	6.97768	6.33287	4.83516	5.17199	4.83516	5.84352	5.64895	5.95425	5.62145	5.79249	5.35366	5.2933	5.62072	5.87302	5.82115	5.19715	5.09702	GPRC5A	9052	0.160455		2.28946	0.0783499	2.83186		0.315527		2.73957
ENSG00000051108	1610.41	0.174883	0.0331885	5.26941	1.36866e-07	3.25034e-06	HERPUD1	9709	10.5415	10.5644	10.5794	10.4003	10.2342	10.4441	10.4773	10.476	10.484	10.9205	11.0456	11.0354	10.776	10.9132	10.9287	10.3209	10.4632	10.4643	10.8553	10.9395	10.8043	10.6588	10.6949	10.7294	10.8346	10.8828	10.9549	10.9506	10.5982	10.6012	HERPUD1	9709	0.07081	0.9999	0.303198	0.125506	0.187942	0.04081	0.135177	0.328729	0.25099
ENSG00000197601	2316.98	-0.190529	0.0361739	-5.26704	1.38641e-07	3.28875e-06	FAR1	84188	10.7575	10.7414	10.9369	11.0571	11.0962	11.0377	11.3005	11.084	11.089	10.9968	10.911	11.2102	11.0052	11.0498	11.0076	11.4483	11.3162	11.3382	11.1177	11.1827	11.2242	11.3896	11.1823	11.1877	11.4984	11.4733	11.369	11.5628	11.6367	11.6166	FAR1	84188	-0.209874	0.568302	-0.206229	0.467309	-0.237786	0.0763466	-0.134779	0.598764	-0.11941
ENSG00000182199	1676.84	0.286085	0.0543336	5.26533	1.39935e-07	3.3119e-06	SHMT2	6472	10.3186	10.1025	10.0473	9.74861	9.72445	9.76638	9.69588	9.87772	9.83011	11.4184	11.5433	11.4097	11.0852	11.1835	11.4026	9.72772	9.64969	9.66748	11.211	11.0942	11.0575	11.0563	11.0466	11.3728	10.8811	11.0297	11.2373	11.0767	10.5273	10.6305	SHMT2	6472	0.135367	0.9999	0.693127	3.09041e-05	0.068063	0.869248	0.342157	0.260847	0.437511
ENSG00000105339	787.903	0.275682	0.0523561	5.26551	1.39801e-07	3.3119e-06	DENND3	22898	9.43935	9.68335	9.46359	9.14189	9.20174	9.37204	9.77114	9.86166	9.60083	10.1556	10.248	10.3578	10.2177	10.2703	9.97756	9.67398	9.81421	9.70955	9.82164	10.0312	10.1186	9.67086	9.73591	9.55877	9.12429	9.34598	9.34754	9.23807	9.09957	9.08768	DENND3	22898	0.021073	0.9999	-0.145386	0.719214	0.538394	5.51685e-06	0.272275	0.118163	0.224213
ENSG00000114626	293.594	0.462314	0.0878711	5.26127	1.43061e-07	3.38204e-06	ABTB1	80325	7.93442	8.03852	7.9591	7.80948	7.37884	7.80273	8.43586	8.39077	8.40672	8.2774	8.58636	8.53888	8.66957	8.7529	8.65922	8.3927	8.43242	8.35569	7.83147	7.89869	8.17481	7.80032	8.11419	7.92967	9.0958	9.08042	9.58366	8.99881	8.66298	8.84511	ABTB1	80325	0.0239599	0.9999	0.210425	0.752273	0.888642	1.31207e-05	0.599526	0.0260835	0.398852
ENSG00000105607	367.962	-0.23935	0.0455092	-5.25938	1.4454e-07	3.39793e-06	GCDH	2639	8.55962	8.31532	8.51137	8.53727	8.51794	8.69953	8.53842	8.61099	8.75532	8.71437	8.58001	8.88021	8.25434	8.13142	8.29076	8.68155	8.81115	8.78637	9.03194	8.91074	9.03151	8.44022	8.68308	8.62724	9.14298	8.89508	8.88868	9.0098	9.07555	9.11869	GCDH	2639	-0.129899	0.9999	0.00732468	0.993565	-0.425659	0.00540117	-0.293723	0.162793	-0.2041
ENSG00000177169	2785.74	0.191818	0.0364673	5.26001	1.44048e-07	3.39793e-06	ULK1	8408	11.5722	11.5669	11.3306	11.3953	11.3133	11.3644	11.3434	11.5395	11.4089	11.6359	11.7053	11.6419	11.7629	11.6147	11.5915	11.4469	11.3971	11.4009	11.4897	11.3604	11.4382	11.2946	11.2403	11.4382	11.3948	11.5676	11.5624	11.5469	11.4034	11.2335	ULK1	8408	0.0242365	0.9999	0.443816	0.00115348	0.341288	0.000141291	0.23361	0.0448041	0.213213
ENSG00000085415	1001.69	-0.190695	0.0362572	-5.2595	1.44447e-07	3.39793e-06	SEH1L	81929	9.87647	9.92627	10.045	10.1824	10.2308	10.191	10.1658	10.0022	10.1338	9.85724	9.91005	10.0075	9.80577	9.85812	9.96267	10.1923	10.0978	10.1457	10.2019	10.1857	10.0928	10.151	10.0322	10.0001	9.93927	9.95019	9.80107	9.96868	10.1652	10.1619	SEH1L	81929	-0.0428612	0.9999	-0.191002	0.482552	-0.192715	0.307826	-0.249367	0.265633	-0.19662
ENSG00000109501	1391.95	-0.185444	0.0352577	-5.25967	1.44313e-07	3.39793e-06	WFS1	7466	9.91776	9.90203	9.82653	9.98657	10.0544	9.99779	9.89808	10.1091	10.0733	10.7207	10.5622	10.6604	9.98898	9.94881	10.1757	10.0656	10.2106	10.2471	10.8937	10.9036	10.8525	10.1656	10.1839	10.3553	11.3703	11.0126	11.0539	11.11	11.1103	11.2191	WFS1	7466	-0.148569	0.9999	-0.0899074	0.794142	-0.203176	0.619934	-0.243425	0.691474	-0.186271
ENSG00000187189	11367	-0.154159	0.0293112	-5.25937	1.44548e-07	3.39793e-06	TSPYL4	23270	13.5846	13.6179	13.6729	13.8024	13.8611	13.8242	13.6064	13.5779	13.6734	13.1625	13.1027	13.0704	13.3384	13.3009	13.23	13.6971	13.6676	13.7898	13.4429	13.2789	13.2851	13.5271	13.3618	13.4161	13.4046	13.3488	13.1081	13.385	13.4095	13.3278	TSPYL4	23270	-0.0948477	0.9999	-0.125805	0.506168	-0.143711	0.410493	-0.228115	0.209804	-0.0983274
ENSG00000110958	6362.81	-0.19882	0.0378089	-5.25856	1.45188e-07	3.40538e-06	PTGES3	10728	12.5343	12.6423	12.733	12.8836	12.878	12.8315	12.5829	12.6087	12.6573	12.62	12.6396	12.5781	12.3878	12.4156	12.4408	12.6635	12.7147	12.7582	12.8382	12.7998	12.6924	12.7698	12.9103	12.6182	12.6417	12.4658	12.2098	12.5959	12.561	12.5201	PTGES3	10728	-0.0914718	0.964464	-0.110579	0.609506	-0.356216	1.69665e-06	-0.168447	0.132579	-0.146077
ENSG00000186310	7058.37	-0.179772	0.0341874	-5.25844	1.45283e-07	3.40538e-06	NAP1L3	4675	12.5151	12.5928	12.6746	12.8208	12.8083	12.7912	12.3264	12.2635	12.336	12.9002	12.7851	12.8628	13.1823	13.1125	12.976	12.4572	12.3567	12.4105	13.1289	13.0234	13.0191	13.3833	13.3368	13.201	12.7493	12.6049	12.2827	12.6694	12.6451	12.6552	NAP1L3	4675	-0.0967184	0.888441	-0.1069	0.535533	-0.214191	0.00330922	-0.210495	0.0111065	-0.158583
ENSG00000088854	3121.51	0.150795	0.0286773	5.25835	1.45355e-07	3.40538e-06	DNAAF9	25943	11.9221	11.9312	11.9382	11.8064	11.8395	11.795	11.8588	11.7768	11.8566	11.2948	11.3139	11.3488	11.6763	11.7271	11.6538	11.7366	11.568	11.7179	11.2584	11.1426	11.0283	11.5764	11.2922	11.5162	11.5278	11.687	11.6724	11.7088	11.6451	11.638	DNAAF9	25943	0.162031	0.834817	0.342859	0.10616	0.227108	0.0879313	0.175745	0.378324	0.0830152
ENSG00000154217	8409.21	-0.24837	0.0472583	-5.25558	1.47561e-07	3.45319e-06	PITPNC1	26207	12.9151	12.9294	13.0055	13.1798	13.2763	13.2125	13.0139	12.9537	13.0253	13.1361	13.012	13.1724	12.4491	12.408	12.5502	13.088	13.0742	13.2313	13.5399	13.394	13.3703	12.8345	12.6325	12.6539	13.1183	13.1086	12.5516	13.1962	13.3512	13.2306	PITPNC1	26207	-0.130971	0.997425	-0.336983	0.205281	-0.238279	0.205707	-0.331657	0.0898653	-0.259383
ENSG00000278919	79.4979	0.613259	0.116701	5.25496	1.48058e-07	3.46094e-06	NA	NA	6.91795	6.94685	7.17802	6.5487	6.61696	6.91264	7.37745	7.21165	7.18305	7.02274	7.15086	7.47076	7.63496	7.71989	7.39037	6.97762	7.33504	7.13512	6.52006	6.86986	7.12821	6.54313	7.23619	6.80638	6.42774	6.95728	6.62386	6.70112	6.31935	6.38179	NA	NA	0.154082	0.9999	0.0413447	0.98093	1.02029	0.000777792	0.567265	0.272813	0.731292
ENSG00000165714	723.946	0.237044	0.0451107	5.25473	1.48243e-07	3.46138e-06	BORCS5	118426	9.29551	9.45569	9.54	9.25723	9.44346	9.19209	9.70687	9.60466	9.65598	9.5596	9.51821	9.55689	9.70598	9.63003	9.62381	9.46139	9.30513	9.59878	9.4573	9.39435	9.26935	9.25736	9.12637	9.23743	9.87451	10.1882	10.0375	10.2208	10.0482	10.0536	BORCS5	118426	0.216464	0.98067	0.409596	0.146321	0.487731	0.0336129	0.182124	0.748091	0.163001
ENSG00000198108	78.5075	-0.437408	0.0832451	-5.25446	1.48463e-07	3.46265e-06	CHSY3	337876	7.07073	6.8208	6.77701	6.97738	6.91731	7.07396	6.53394	6.18251	6.26081	7.42468	7.30201	7.31302	6.72737	6.57177	6.81776	6.3608	6.37945	6.47823	7.76774	7.64883	7.77573	7.24474	7.02643	7.11012	6.93997	6.82359	6.84844	6.87942	7.13676	7.29059	CHSY3	337876	-0.168356	0.9999	0.242795	0.807558	-0.675933	0.0517497	-0.523312	0.244959	-0.444006
ENSG00000160877	2744.61	-0.144266	0.027479	-5.25006	1.5205e-07	3.54233e-06	NACC1	112939	11.333	11.315	11.1392	11.4281	11.4643	11.4283	11.4077	11.413	11.5131	11.4589	11.4309	11.3305	11.1442	11.1245	11.1762	11.4833	11.4949	11.5726	11.5822	11.4609	11.4475	11.3324	11.1718	11.3996	11.8331	11.542	11.6066	11.6312	11.7788	11.7734	NACC1	112939	-0.0675585	0.9999	-0.181668	0.399147	-0.156409	0.112018	-0.0938538	0.613525	-0.20911
ENSG00000238105	38.8019	0.707228	0.134786	5.24704	1.54558e-07	3.59676e-06	GOLGA2P5	55592	6.3663	6.43541	6.51613	6.05833	5.96252	6.18993	6.53394	6.45889	6.1512	6.48451	6.80733	6.7231	7.07344	6.98786	6.45012	6.15452	6.21436	5.92772	6.16012	6.62295	6.71623	6.26519	6.22674	6.27899	6.19032	6.43846	6.69849	6.46542	6.13644	6.28538	GOLGA2P5	55592	0.626814	0.995764	0.384744	0.655972	1.14975	0.155234	0.279856		0.677032
ENSG00000214176	486.519	0.378617	0.0721745	5.24585	1.55563e-07	3.6161e-06	PLEKHM1P1	440456	9.06375	9.00526	9.01472	8.56321	8.44343	8.85395	9.30511	9.352	9.15723	9.22524	9.21724	9.15563	9.56422	9.62539	9.43154	9.25709	9.13867	8.60011	8.56087	9.07407	9.09368	8.94512	8.8561	9.11317	8.91325	9.23011	9.27892	8.84368	8.94571	8.82868	PLEKHM1P1	440456	0.276189	0.98067	0.237843	0.741041	0.625982	0.0397908	0.298386	0.637828	0.254853
ENSG00000196507	920.472	-0.224591	0.0428203	-5.24497	1.56308e-07	3.62938e-06	TCEAL3	85012	9.66449	9.86489	9.91645	10.1594	9.9878	10.1065	9.6885	9.75389	9.61555	10.0986	10.024	9.90996	9.81601	9.78511	9.9015	9.74142	9.81421	9.78457	10.1268	10.218	10.1974	10.1565	10.3859	10.0635	9.96536	9.59995	9.8248	9.72846	9.79534	9.85548	TCEAL3	85012	-0.094445	0.9999	-0.355153	0.272189	-0.391407	0.0199126	-0.178894	0.60473	-0.168536
ENSG00000260822	683.423	-0.319567	0.0609829	-5.24027	1.60343e-07	3.71892e-06	NA	NA	9.10226	9.23257	9.20242	9.70869	9.60657	9.60682	9.63577	9.34541	9.40458	8.8305	8.95843	8.89698	8.87773	8.95927	8.76067	9.48873	9.69398	9.87447	9.23149	9.20173	8.9474	9.16916	9.51433	8.86201	10.1513	10.1829	10.1052	10.0292	10.2764	10.5113	NA	NA	-0.239998	0.9999	-0.500334	0.0358015	-0.374439	0.398563	-0.265846	0.762303	-0.227009
ENSG00000183048	128.255	-0.374863	0.0715539	-5.23889	1.61545e-07	3.74263e-06	SLC25A10	1468	7.25553	7.52239	7.0887	7.39081	7.30108	7.5653	7.66592	7.63431	7.29335	7.66103	7.56154	7.52688	7.24108	7.32613	7.20228	7.49582	7.78562	7.99299	7.86227	7.70471	7.88154	7.57304	7.84262	7.83725	7.30955	7.03467	7.0169	7.06311	7.25895	7.24022	SLC25A10	1468	-0.299453	0.896105	-0.58289	0.550169	-0.686877	0.00196016	-0.307583	0.47278	-0.349946
ENSG00000103415	2561.29	-0.22802	0.0435479	-5.23607	1.64031e-07	3.796e-06	HMOX2	3163	11.2994	11.2637	11.2812	11.4316	11.4077	11.45	11.3066	11.4701	11.4579	11.4115	11.3328	11.2408	11.1549	11.1262	11.1875	11.5042	11.6802	11.6159	11.7114	11.4908	11.5307	11.216	11.541	11.3421	11.3803	11.049	10.6844	11.1701	11.2972	11.1821	HMOX2	3163	-0.186148	0.825555	-0.0699747	0.914053	-0.21849	0.174083	-0.257322	0.166007	-0.316103
ENSG00000162819	692.347	0.206984	0.0395393	5.2349	1.65074e-07	3.81592e-06	BROX	148362	9.63274	9.50161	9.72493	9.52709	9.52871	9.41696	9.66614	9.63739	9.58895	9.3513	9.5412	9.37171	9.5257	9.65149	9.66121	9.54451	9.42172	9.42923	9.11006	9.28695	9.08496	9.51656	9.53986	9.31843	9.6079	9.80255	10.0139	9.77882	9.57399	9.69468	BROX	148362	0.180548	0.930712	0.255873	0.576464	0.168441	0.411421	0.280694	0.212608	0.253885
ENSG00000105072	163.071	0.275585	0.0526595	5.23333	1.66487e-07	3.84432e-06	C19orf44	84167	8.12263	7.99282	7.91937	7.78741	7.81729	7.70218	8.00416	7.85783	7.99025	7.87911	7.85624	7.80495	7.91236	8.06375	7.92221	7.87903	7.64347	7.54408	7.33784	7.63738	7.62496	7.69133	7.81742	7.68605	7.425	7.47415	7.54452	7.54005	7.36487	7.39645	C19orf44	84167	0.315989	0.558039	0.117049	0.924745	0.30334	0.0975196	0.402866	0.091329	0.168595
ENSG00000169668	10.0453	1.28502	0.245607	5.23201	1.67673e-07	3.86742e-06	BCRP2	400892	6.3007	6.20055	6.14043	5.96521	5.72789	5.96619	5.22645	5.75094	6.07118	5.91894	5.80682	5.76785	5.75303	5.8107	5.65567	5.45701	5.50435	5.61671	4.83516	5.30912	5.43012	5.39455	5.51819	5.25926	5.18568	5.37846	5.14069	5.37967	5.12162	5.06202	BCRP2	400892	0.931135		0.102722		1.40128		2.41648		1.44991
ENSG00000132478	610.012	0.182959	0.0349932	5.22843	1.70955e-07	3.93877e-06	UNK	85451	9.55786	9.3047	9.21058	9.17161	9.15957	9.21023	9.26098	9.3487	9.38408	9.4672	9.51157	9.37171	9.67676	9.66964	9.64419	9.33149	9.16648	9.191	9.28483	9.33992	9.18624	9.38812	9.38505	9.51773	9.35117	9.53526	9.49959	9.38156	9.31945	9.31129	UNK	85451	0.115294	0.999377	0.0768641	0.895888	0.252785	0.0682469	0.192445	0.387931	0.154926
ENSG00000186297	370.442	-0.516979	0.09892	-5.22624	1.72995e-07	3.98138e-06	GABRA5	2558	8.66654	8.26258	8.5888	9.29627	9.21896	9.17987	8.80814	8.63288	8.56752	8.82222	8.48108	8.1816	8.63802	8.70073	8.93917	9.03748	8.98648	9.06221	8.98663	8.82896	8.76273	9.18003	9.15972	9.27271	7.99388	7.96137	7.03557	8.05432	8.39544	7.99837	GABRA5	2558	-0.400432	0.814171	-0.0891601	0.902715	-0.489362	0.132701	-0.394992	0.430332	-0.48634
ENSG00000105514	1724.17	-0.247281	0.047336	-5.22394	1.75152e-07	4.02657e-06	RAB3D	9545	10.3841	10.5426	10.4547	10.591	10.6422	10.5616	10.8303	10.9624	10.9287	10.5821	10.4065	10.5746	10.3112	10.3142	10.3847	11.033	10.9835	10.9659	10.8986	10.6439	10.6639	10.5403	10.5442	10.6952	11.3496	11.1035	10.7486	11.0908	11.5623	11.4775	RAB3D	9545	-0.083754	0.9999	-0.10344	0.782623	-0.265331	0.483253	-0.226034	0.739184	-0.488573
ENSG00000205856	78.4331	-0.540374	0.103465	-5.22279	1.76244e-07	4.04275e-06	C22orf42	150297	7.57557	7.84607	7.84702	8.23188	8.43753	8.35134	6.93379	6.96462	6.95022	6.43698	6.14545	6.19857	6.40833	6.24846	6.25995	7.21485	7.18257	7.01998	6.16012	6.86986	6.47514	6.80874	6.72001	6.60218	5.89043	5.82509	5.51337	5.7516	5.7621	5.78157	C22orf42	150297	-0.297332	0.98067	-0.805682	0.0443077	-0.7668	0.0262063	-0.536427	0.408798	-0.325139
ENSG00000170776	2673.81	0.19314	0.0369793	5.22293	1.76114e-07	4.04275e-06	AKAP13	11214	11.3667	11.3114	11.4299	11.3141	11.3705	11.3074	11.6827	11.5609	11.5419	11.1645	11.0684	11.1197	11.2319	11.2075	11.2429	11.4476	11.3118	11.5094	11.0611	10.9621	10.864	11.0504	10.826	10.9601	11.5635	12.0179	12.0949	11.9952	11.8563	11.8077	AKAP13	11214	0.178352	0.535427	0.165156	0.654589	0.290409	0.00379895	0.156619	0.349797	0.289008
ENSG00000178947	2847.6	-0.339064	0.064937	-5.22143	1.77545e-07	4.06365e-06	SMIM10L2A	399668	11.3491	11.4355	11.3657	11.8456	11.85	11.8756	11.4616	11.4678	11.4274	11.5265	11.5698	11.2907	11.5812	11.5184	11.4625	11.685	11.8052	11.854	11.9706	11.5887	11.6409	11.7785	11.816	11.9142	10.8321	10.7968	9.98626	10.9202	11.0658	10.755	SMIM10L2A	399668	-0.331813	0.597693	-0.229112	0.0864485	-0.318238	0.173746	-0.282714	0.385692	-0.275562
ENSG00000173276	492.673	0.321612	0.0615927	5.22159	1.77397e-07	4.06365e-06	ZBTB21	49854	9.10648	9.0721	9.16511	8.83719	8.97724	8.92166	9.11434	8.91756	9.03537	9.18709	8.92878	9.19341	9.56877	9.48894	9.17542	8.98076	8.82619	8.77506	8.80529	9.01444	8.8374	8.95783	8.86828	8.74944	8.93845	9.4129	9.62657	9.32996	9.23148	9.32517	ZBTB21	49854	0.182936	0.9999	0.169052	0.784374	0.623722	0.0156457	0.245097	0.681807	0.30962
ENSG00000254585	2180.94	-0.234489	0.0449303	-5.21893	1.79956e-07	4.11432e-06	MAGEL2	54551	11.1996	11.3086	11.2038	11.4662	11.5577	11.495	11.369	11.5286	11.5572	10.5171	10.575	10.44	11.4746	11.2085	11.0972	11.5747	11.6608	11.63	10.9047	10.6812	10.7476	11.6129	11.6655	11.5113	10.1919	10.1317	9.81453	10.192	10.3204	10.0765	MAGEL2	54551	-0.131668	0.98067	-0.192037	0.395616	-0.332501	0.015948	-0.280873	0.125578	-0.15363
ENSG00000168481	3032.5	-0.276709	0.0530652	-5.21452	1.84293e-07	4.20426e-06	LGI3	203190	11.1373	11.2513	11.0659	11.5182	11.4686	11.4532	11.5313	11.5862	11.5595	11.748	11.6092	11.6689	10.6971	10.6639	10.7767	11.6761	11.9277	11.8916	11.8338	11.6967	11.7363	10.9173	11.0404	11.0784	12.2929	11.9764	11.4139	12.1371	12.3144	12.1163	LGI3	203190	-0.276693	0.995764	-0.143521	0.482552	-0.306387	0.517308	-0.0831637	0.959998	-0.375241
ENSG00000102119	1410.38	-0.205471	0.0394034	-5.21455	1.84264e-07	4.20426e-06	EMD	2010	10.3003	10.3375	10.2085	10.6312	10.4562	10.5744	10.3569	10.4254	10.5189	10.6687	10.5215	10.6093	10.3531	10.3152	10.4296	10.5417	10.6601	10.5886	10.6833	10.6606	10.6957	10.6195	10.8889	10.6242	10.6207	10.3003	10.3593	10.4651	10.5084	10.3895	EMD	2010	-0.161561	0.734171	-0.357495	0.147706	-0.360731	0.0001714	-0.0818395	0.779553	-0.142446
ENSG00000173930	26.3766	-1.06969	0.205153	-5.21413	1.84684e-07	4.20857e-06	SLCO4C1	353189	5.89275	5.84536	5.67713	6.57683	6.49805	6.06824	5.77961	5.75094	5.88848	6.09977	5.80682	5.71615	5.5887	5.57278	5.49285	6.76621	6.89507	6.72877	6.30476	6.13713	5.43012	6.057	5.69446	5.8563	6.34757	6.11798	6.36736	6.3963	6.80932	6.50441	SLCO4C1	353189	-2.18293		-2.63847		-1.10489		-0.368561		-0.540325
ENSG00000006756	1248.19	0.149095	0.0285957	5.2139	1.84911e-07	4.20916e-06	ARSD	414	10.0525	10.1194	10.1226	9.87766	9.90949	9.89701	10.0088	10.0797	10.0881	10.679	10.7358	10.6481	10.4234	10.5576	10.5557	9.95435	9.90412	9.84782	10.5912	10.5332	10.4671	10.3531	10.208	10.3784	10.5412	10.5884	10.6071	10.6754	10.6135	10.5818	ARSD	414	0.170652	0.692971	0.750066	0.000104518	0.210054	0.0497701	0.160097	0.305574	0.0431996
ENSG00000014914	115.823	0.461355	0.0884926	5.21348	1.85331e-07	4.21212e-06	MTMR11	10903	7.10629	6.98627	6.97286	6.6312	6.68308	7.06009	6.93379	6.81085	6.73753	7.61298	7.69896	7.71191	8.35686	8.42837	8.11167	6.92794	6.87481	6.87143	7.03973	7.52981	7.46949	7.97062	7.96221	7.79687	6.75612	7.35468	7.39706	7.25216	6.90503	6.75507	MTMR11	10903	-0.103933	0.9999	1.00488	0.0879065	0.487755	0.351871	0.424742	0.639945	0.81007
ENSG00000115738	912.4	0.408668	0.0783885	5.21336	1.85446e-07	4.21212e-06	ID2	3398	10.5275	10.323	10.4005	9.75703	9.54789	9.68017	9.11434	9.15493	9.34574	9.41867	9.2575	9.32299	10.3766	10.1463	9.94003	8.79132	8.53387	8.65055	9.34345	9.47231	9.443	9.5726	9.56991	9.5079	10.6545	10.721	10.827	10.6007	10.6433	10.6117	ID2	3398	0.618593	0.00363531	0.313765	0.412876	0.657912	5.10802e-05	-0.0942913	0.8899	0.0803637
ENSG00000197536	45.9893	0.5573	0.106935	5.21159	1.87224e-07	4.24789e-06	NA	NA	6.62267	6.46532	6.48666	6.29545	6.21601	6.24586	6.63831	6.56314	6.71415	6.48451	6.52234	6.59542	6.56511	6.791	6.707	6.3608	6.57662	6.56763	6.65285	6.31249	6.34993	6.38457	6.19694	6.33112	6.51967	6.77345	7.19929	6.96662	6.56663	6.56914	NA	NA	0.26229	0.9999	2.13141		0.74617	0.0624987	0.166276		0.742659
ENSG00000196365	3109.72	0.244357	0.0469006	5.2101	1.88734e-07	4.2775e-06	LONP1	9361	11.2819	11.2779	11.0681	11.1236	11.011	11.1005	11.0111	11.2313	11.1397	12.1789	12.2705	12.1819	11.928	11.9862	12.077	11.1298	11.2212	11.1472	11.8553	11.7543	11.9338	11.5439	11.6327	11.8306	11.6364	11.9498	11.8256	11.9642	11.5115	11.4026	LONP1	9361	-0.0313493	0.9999	0.546204	0.00463888	0.332474	0.0282413	0.364802	0.0288674	0.397895
ENSG00000159363	14218.2	-0.236593	0.0454137	-5.20972	1.89123e-07	4.28165e-06	ATP13A2	23400	13.8292	13.9093	13.7348	14.177	14.1471	14.1077	13.9375	14.0892	14.0502	13.6447	13.5872	13.4647	13.6023	13.5467	13.5759	14.0709	14.3177	14.2771	13.8778	13.5303	13.6405	13.7815	13.8145	13.9344	13.5872	13.354	12.9642	13.4849	13.6306	13.4318	ATP13A2	23400	-0.194383	0.684903	-0.064017	0.804311	-0.267684	0.0421341	-0.124754	0.648231	-0.271237
ENSG00000180964	1628	-0.147683	0.0283505	-5.20917	1.89685e-07	4.28972e-06	TCEAL8	90843	10.6376	10.6542	10.8457	10.9694	10.9152	10.8892	10.8169	10.8106	10.6461	10.5184	10.5542	10.5798	10.4442	10.3891	10.5449	10.8419	10.922	10.8935	10.6917	10.6989	10.5782	10.651	10.734	10.5828	10.831	10.6927	10.6931	10.742	10.8096	10.7497	TCEAL8	90843	-0.125852	0.982289	-0.145642	0.711209	-0.200708	0.217206	-0.112079	0.748091	-0.0943982
ENSG00000178573	4686.88	-0.371045	0.0712388	-5.20846	1.90413e-07	4.30151e-06	MAF	4094	11.62	11.7292	11.6306	11.8787	11.7995	11.8256	12.4377	12.2774	12.4726	12.088	12.1778	12.2268	10.3478	10.367	10.7986	12.2082	12.3907	12.4092	12.8668	12.6277	12.7371	11.2963	11.0555	11.3483	12.9745	12.6961	12.3618	12.7619	13.0262	13.071	MAF	4094	0.0651817	0.9999	-0.467471	0.00147096	-0.737721	1.6626e-05	-0.589314	0.00240611	-0.412123
ENSG00000272121	482.601	-0.3912	0.0751265	-5.20722	1.91686e-07	4.32559e-06	NA	NA	8.64346	8.95418	8.69177	8.95917	8.78692	8.9106	9.0865	9.31873	9.42813	8.4275	8.24382	8.47313	8.72792	8.61559	9.06099	9.42788	9.72098	9.43283	8.9255	8.62727	8.81646	9.03178	9.41295	9.32685	9.54239	9.12668	8.63718	9.25149	9.62735	9.41127	NA	NA	-0.263684	0.97092	-0.111084	0.928254	-0.501726	0.0666895	-0.475122	0.192439	-0.549582
ENSG00000144161	812.965	0.192021	0.0368815	5.20643	1.92513e-07	4.33956e-06	ZC3H8	84524	9.64147	9.65751	9.85019	9.44264	9.52318	9.50282	9.75711	9.58522	9.71457	9.65343	9.87688	9.80752	10.0725	10.0035	9.94888	9.54971	9.51111	9.34779	9.59028	9.77105	9.66371	9.81718	9.72705	9.6554	9.8985	10.0266	9.94121	10.1072	9.93014	9.93379	ZC3H8	84524	0.228646	0.307421	0.638496	0.0179505	0.296996	0.00219958	0.106831	0.660413	0.109311
ENSG00000226087	23.6763	1.0587	0.203453	5.20365	1.95409e-07	4.39865e-06	LOC124907763	124907763	6.15641	6.52294	6.48666	6.36419	6.04171	6.00141	6.09637	5.99109	6.26081	6.19441	6.18557	6.16633	6.83919	6.86003	6.62728	5.93788	5.65119	5.87401	5.94519	5.82555	5.52058	5.68276	5.79249	5.77044	5.86717	5.79159	5.67539	6.0551	5.44599	5.60178	LOC124907763	124907763	0.778021		1.24723	0.191877	2.34147		1.06157		0.645501
ENSG00000148798	32149.6	-0.158335	0.0304284	-5.20351	1.95557e-07	4.39865e-06	INA	9118	15.2645	15.3012	15.296	15.5502	15.5267	15.4374	15.1331	15.1529	15.1875	14.3724	14.3938	14.2345	15.0626	14.9681	14.9534	15.209	15.2415	15.3674	14.7211	14.4394	14.4285	15.0993	15.1766	15.0797	14.5921	14.5095	14.3155	14.4963	14.6028	14.529	INA	9118	-0.11156	0.9999	-0.157779	0.0703067	-0.120689	0.767066	-0.202849	0.711968	-0.135061
ENSG00000162769	1550.47	-0.255449	0.0491031	-5.20229	1.96843e-07	4.42282e-06	FLVCR1	28982	10.5934	10.6843	10.6811	10.9241	11.0461	10.9913	10.8016	10.6781	10.8046	10.1977	10.0967	10.1814	10.6086	10.5413	10.4914	11.2495	11.072	11.3141	10.3802	10.2105	10.1647	10.6562	10.6083	10.5544	10.4775	10.4323	10.1005	10.482	10.7505	10.6579	FLVCR1	28982	-0.462001	5.57798e-06	-0.34235	0.167988	-0.0573816	0.765628	-0.100562	0.718295	-0.29772
ENSG00000186684	190.594	0.36746	0.0706458	5.20145	1.97745e-07	4.43829e-06	CYP27C1	339761	8.38252	8.48912	8.47102	8.32603	8.24819	7.99152	7.55436	8.0423	7.71886	6.96075	7.11482	6.89306	7.9411	7.84952	7.51437	7.49582	7.43239	7.58426	7.03973	6.46388	6.61494	7.41875	7.46207	7.21434	8.48153	8.65727	8.67414	8.76798	8.50512	8.44994	CYP27C1	339761	0.388229	0.933557	0.424292	0.655356	0.561294	0.139043	0.42883	0.578515	0.254003
ENSG00000138078	10859	-0.17378	0.033412	-5.20113	1.9808e-07	4.44103e-06	PREPL	9581	13.5521	13.5557	13.6861	13.9308	13.9413	13.8546	13.459	13.3496	13.4442	12.9791	12.9535	13.0248	13.1364	13.1969	13.1393	13.5778	13.4306	13.6605	13.2965	13.1739	13.1124	13.4509	13.205	13.1812	13.4041	13.3435	13.3096	13.4442	13.4571	13.4769	PREPL	9581	-0.136983	0.865205	-0.227056	0.243612	-0.123797	0.381929	-0.213041	0.125134	-0.0829808
ENSG00000038382	7083.61	0.216169	0.0415671	5.20048	1.98778e-07	4.4519e-06	TRIO	7204	13.1766	13.1813	13.1426	13.0079	13.0426	12.9848	12.8444	12.807	12.8946	12.8296	12.7287	12.7151	13.1792	13.0678	12.9591	12.763	12.4928	12.817	12.6017	12.4765	12.413	12.835	12.4816	12.7531	12.3134	12.6283	12.5431	12.6575	12.5759	12.529	TRIO	7204	0.157344	0.913529	0.215917	0.49685	0.380149	0.00287015	0.260417	0.136199	0.13173
ENSG00000106692	779.679	0.248508	0.0477913	5.19985	1.99444e-07	4.46203e-06	FKTN	2218	9.68715	9.70313	9.93624	9.58811	9.70749	9.51502	9.80905	9.58801	9.72547	9.84097	9.77252	9.85324	9.9383	10.0177	9.80458	9.53143	9.23185	9.57945	9.66108	9.71071	9.55128	9.76524	9.42122	9.64871	9.49958	9.79669	10.0081	9.71587	9.59566	9.70736	FKTN	2218	0.277727	0.847561	0.0994424	0.893639	0.328554	0.174801	0.191254	0.697384	0.253742
ENSG00000163359	69.6383	-0.832128	0.160057	-5.19894	2.00428e-07	4.47923e-06	COL6A3	1293	5.4234	5.42624	5.52581	5.67917	5.96252	5.35127	5.77961	5.80455	5.9842	8.18298	7.57461	7.93384	5.72286	5.74979	6.0974	5.80752	6.37945	6.38145	8.2657	8.82896	8.60057	6.38457	6.03368	6.16662	6.30271	6.22655	6.04298	6.32719	6.58539	6.87142	COL6A3	1293	-0.912081	0.9999	-0.0258731	0.979838	-0.840666	0.799048	-0.805451	0.90651	-0.809698
ENSG00000134086	2083.74	0.141982	0.0273126	5.1984	2.01006e-07	4.48734e-06	VHL	7428	11.3104	11.3342	11.3381	11.1504	11.2106	11.2005	11.2005	11.053	11.1468	10.9273	10.8805	10.831	11.4324	11.2904	11.2414	11.0578	11.0154	10.9396	10.8196	10.7362	10.69	11.1411	11.0115	11.2007	10.8998	11.0113	10.8987	10.9067	10.8235	10.8097	VHL	7428	0.136968	0.995764	0.323858	0.1095	0.212021	0.298907	0.133229	0.752385	0.0943432
ENSG00000250486	377.49	0.270195	0.0520113	5.19493	2.04795e-07	4.56703e-06	FAM218A	152756	9.13976	9.1931	9.44988	9.04428	8.87223	8.9143	8.99958	9.01228	9.12463	8.94556	8.95843	8.77069	9.07233	9.07746	8.88211	8.90552	8.90386	8.9104	8.54215	8.71568	8.71825	8.7347	8.67847	8.78659	7.46412	7.82336	7.40834	7.73531	7.55302	7.44344	FAM218A	152756	0.162144	0.9999	0.953799	0.0363402	0.318993	0.387423	0.263418	0.689118	0.243294
ENSG00000090339	31.2769	0.989945	0.190573	5.19457	2.0519e-07	4.57095e-06	ICAM1	3383	5.51287	5.51613	5.43468	5.18381	4.83516	5.2573	5.38686	5.29878	5.42095	6.67765	6.91813	6.59542	6.34563	6.37227	6.51214	4.83516	5.17199	5.18809	6.7953	6.4057	6.64106	6.09474	5.69446	6.07368	6.48982	7.05401	7.5846	6.96662	6.28128	6.49607	ICAM1	3383	1.93065		0.857087	0.390303	1.01761		0.19951		1.34747
ENSG00000148677	388.661	-0.620783	0.119547	-5.19279	2.07171e-07	4.61017e-06	ANKRD1	27063	5.72574	5.99419	5.85941	6.01289	6.11501	6.29905	6.09637	5.80455	5.31454	9.903	10.0585	10.2562	8.69208	8.6527	9.1883	5.7593	5.97479	5.92772	10.5927	10.719	10.7735	9.5137	9.51433	9.34353	7.17831	6.52507	6.26039	7.02082	6.87588	6.91693	ANKRD1	27063	-0.28784	0.9999	-0.525943	0.374708	-0.652669	0.708775	-0.645835	0.844544	-0.58896
ENSG00000110721	1518.45	-0.24073	0.0463693	-5.19158	2.08517e-07	4.63518e-06	CHKA	1119	10.6664	10.5843	10.6545	10.9826	10.8681	10.7025	10.9038	10.9752	10.9636	10.4082	10.244	10.3593	10.0248	10.0388	10.0033	10.8928	11.2334	11.2269	10.6431	10.6744	10.7531	10.3941	10.1693	10.2751	10.6064	10.5107	10.0954	10.5476	10.5216	10.5578	CHKA	1119	-0.176881	0.923354	-0.0830263	0.845829	-0.269681	0.120408	-0.366815	0.040869	-0.171374
ENSG00000101247	900.479	-0.21659	0.0417302	-5.19026	2.10001e-07	4.66319e-06	NDUFAF5	79133	9.67019	9.73916	10.0081	9.90567	10.0018	9.94468	9.86901	10.0353	9.84517	9.86329	9.83231	10.0114	9.56877	9.68161	9.54096	10.0818	10.0368	9.97149	10.0845	10.1125	10.1994	9.84928	9.9528	9.7912	9.98583	9.78884	9.52754	9.87354	10.0006	9.99678	NDUFAF5	79133	-0.11264	0.995764	-0.271791	0.418999	-0.283057	0.0396272	-0.24199	0.184943	-0.27462
ENSG00000108262	4296.5	-0.140662	0.0271102	-5.18852	2.11969e-07	4.70189e-06	GIT1	28964	12.0725	12.1459	12.0035	12.3335	12.278	12.264	11.6696	11.8419	11.9112	12.2522	12.1125	12.0813	12.2187	12.2166	12.2753	11.8754	12.0267	11.9819	12.2763	12.2183	12.2175	12.3045	12.3188	12.4538	11.9006	11.7561	11.7195	11.7524	11.894	11.7963	GIT1	28964	-0.147556	0.873973	0.0282615	0.930104	-0.121747	0.437992	-0.0894053	0.7724	-0.127426
[truncated: 4,280 more rows]
[truncated: 2 more columns]
