# Supplementary material for: Time‑resolved multi-omic analysis of paclitaxel exposure in human iPSC‑derived sensory neurons unveils mechanisms of chemotherapy‑induced peripheral neuropathy
Source: Cell Death Dis. 2026 Feb 10;17(1):211. doi: 10.1038/s41419-026-08445-2 (PMC12921266; doi:10.1038/s41419-026-08445-2)
Supplement: Supplementary file 12 — Suppl. Table 3. [file 41419_2026_8445_MOESM12_ESM.xlsx]

## Sheet: Suppl_Table3
id	Protein IDs	Majority protein IDs	Protein names	Gene names	Number of proteins	Peptides	Unique peptides	Intensity	ID	IBAQ	MS/MS count	Significant protein_PTX_DMSO_FDR5	Significant protein_PTX_DMSO_FDR10	p-value protein_PTX_DMSO (-log10)	q-value protein_PTX_DMSO	Difference protein_PTX_DMSO (log2 FC)	z protein_DMSO_1	z protein_DMSO_2	z protein_DMSO_3	z protein_PTX_1	z protein_PTX_2	z protein_PTX_3
2813	J3QR65;Q9NYA4	J3QR65;Q9NYA4	Myotubularin-related protein 4	MTMR4	2	2	2	66537000	2813	1209800	2		+	1.86357	0.0599437	-1.90699	-0.873433	-0.496845	0.340572	-2.54307	-2.51352	-1.69408
4227	P17707;F6R5I9;B4DZ60	P17707;F6R5I9;B4DZ60	S-adenosylmethionine decarboxylase proenzyme;S-adenosylmethionine decarboxylase alpha chain;S-adenosylmethionine decarboxylase beta chain	AMD1	3	2	2	59249000	4227	3485200	2		+	1.93008	0.0994348	-1.06584	-0.358451	-0.336599	0.327495	-1.08787	-1.10843	-1.36879
5232	P68366;C9JEV8;C9JQ00;C9JDL2	P68366	Tubulin alpha-4A chain	TUBA4A	4	34	3	18813000000	5232	2311670000	6		+	1.96004	0.100731	1.0056	-0.371302	0.0154953	0.24921	1.19538	0.978486	0.736336
3047	O00767	O00767	Acyl-CoA desaturase	SCD	1	3	3	1227400000	3047	94415000	6	+	+	2.12054	0.0397714	-2.65793	-0.922987	0.681231	0.442711	-2.21989	-2.80336	-2.74959
7691	Q92539	Q92539	Phosphatidate phosphatase LPIN2	LPIN2	1	8	6	812690000	7691	19822000	6		+	2.15835	0.0937978	0.848063	-0.264908	-0.292401	-0.20565	0.339085	0.541918	0.900227
6923	Q86UW8	Q86UW8	Hyaluronan and proteoglycan link protein 4	HAPLN4	1	3	2	469980000	6923	20434000	2		+	2.16404	0.100833	-0.780357	1.18914	1.67409	1.55902	0.722437	0.610916	0.747824
603	A0A0J9YY72;A0A1W2PQQ1;Q5HYW2;A0A0J9YW69	A0A0J9YY72;A0A1W2PQQ1;Q5HYW2;A0A0J9YW69	NHS-like protein 2	NHSL2	4	4	4	394060000	603	8566500	4		+	2.19422	0.0607647	-1.02781	-0.540878	-0.721321	-0.127261	-1.65128	-1.47351	-1.34809
6100	Q4J6C6;H7C0M0;H7BZP6;C9JMT4	Q4J6C6	Prolyl endopeptidase-like	PREPL	4	26	26	40064000000	6100	1252000000	54		+	2.2048	0.0535385	-1.09247	0.752958	0.846496	0.798983	-0.435335	0.11264	-0.556264
2920	M0QY66;Q9BZC1;A0A0C4DGR1;B4DHA8	M0QY66;Q9BZC1;A0A0C4DGR1;B4DHA8	CUGBP Elav-like family member 4	CELF4	4	12	3	965280000	2920	413010000	3		+	2.25673	0.0840476	-0.813547	0.055074	-0.21878	0.185319	-0.757501	-0.981502	-0.680026
5064	P58004	P58004	Sestrin-2	SESN2	1	8	8	1431400000	5064	62233000	11	+	+	2.2595	0.0473333	1.28152	-0.533742	-0.993155	-1.06509	0.172486	0.734128	0.345968
5996	Q16760;H7BZR7;C9JY42;H7C0L1;A0A096LNI6	Q16760	Diacylglycerol kinase delta	DGKD	5	16	9	1228200000	5996	23619000	9		+	2.27393	0.0927556	-0.757755	-0.235072	-0.0395106	-0.00618361	-1.00908	-0.923993	-0.62096
8999	Q9NP77	Q9NP77	RNA polymerase II subunit A C-terminal domain phosphatase SSU72	SSU72	1	3	3	493510000	8999	44864000	4		+	2.28786	0.0997938	-0.698721	-0.0672659	-0.293286	-0.0432569	-0.732403	-0.739333	-1.02824
451	Q16850;A0A0C4DFL7;H7C0D0	Q16850;A0A0C4DFL7	Lanosterol 14-alpha demethylase	CYP51A1	3	13	12	10386000000	451	424950000	16	+	+	2.32788	0.0475122	-1.29982	1.27561	1.38579	1.00505	0.318848	-0.282031	-0.269839
6107	Q4R9M9;A0A087WWA3;O60333;A0A0U1RQL3	Q4R9M9;A0A087WWA3;O60333	Kinesin-like protein;Kinesin-like protein KIF1B	KIF1Bbeta;KIF1B	4	41	24	4820800000	6107	49192000	33		+	2.33099	0.0792683	-0.774666	-0.182375	-0.159401	0.174183	-0.969037	-0.794477	-0.728078
8121	Q96MT1	Q96MT1	RING finger protein 145	RNF145	1	2	2	135210000	8121	5878500	2	+	+	2.33286	0.03776	-2.30288	0.893983	1.02027	2.0558	-0.695681	-1.26595	-0.976943
9005	Q9NPA3	Q9NPA3	Mid1-interacting protein 1	MID1IP1	1	3	3	288800000	9005	26254000	3		+	2.36837	0.0914884	-0.714639	-0.159031	-0.0713244	-0.392816	-0.958309	-0.776667	-1.03211
8064	Q96JG8;D6RBW3	Q96JG8	Melanoma-associated antigen D4	MAGED4	2	17	15	8266400000	8064	285050000	27		+	2.3738	0.0685714	-0.789482	0.560634	0.556206	0.772383	-0.322452	-0.217316	0.0605439
4484	P30291;E9PRU3;H0YEJ2;E9PQ51	P30291;E9PRU3	Wee1-like protein kinase	WEE1	4	4	4	996480000	4484	30196000	4		+	2.38182	0.10183	0.653484	1.7056	1.70576	1.37879	2.22072	2.23962	2.29028
6948	Q86VY4	Q86VY4	Testis-specific Y-encoded-like protein 5	TSPYL5	1	12	12	3250100000	6948	171060000	15		+	2.39106	0.0676923	-0.77138	-0.702492	-0.27105	-0.440466	-1.20292	-1.21363	-1.3116
3542	O75683	O75683	Surfeit locus protein 6	SURF6	1	7	6	2076200000	3542	118260000	9		+	2.39574	0.0917363	0.687353	-0.0987458	-0.204316	-0.200612	0.717101	0.505747	0.335536
6666	Q6ZN40	Q6ZN40	Tropomyosin alpha-1 chain	TPM1	1	25	2	152110000	6666	982110000	2		+	2.41239	0.0794217	0.721648	0.784684	0.700865	0.84384	1.72221	1.36395	1.40817
7634	Q8WVX9;E9PNW8;E9PPB8	Q8WVX9;E9PNW8	Fatty acyl-CoA reductase 1	FAR1	3	5	5	816590000	7634	28158000	7		+	2.41952	0.0638378	-0.786576	0.273727	0.514983	0.594952	-0.253489	-0.499724	-0.222852
6520	Q6NV74;C9JK00	Q6NV74	Uncharacterized protein KIAA1211-like	KIAA1211L	2	4	4	170950000	6520	3975500	4	+	+	2.42513	0.0480889	1.07751	-1.69178	-1.89625	-1.42779	-0.455785	-0.823316	-0.504193
5608	Q13387	Q13387	C-Jun-amino-terminal kinase-interacting protein 2	MAPK8IP2	1	8	8	1100000000	5608	37931000	8	+	+	2.43236	0.0444103	-1.19299	-0.205203	-0.325065	0.0606903	-1.6688	-1.19334	-1.18641
5550	Q13023;G3V3H7;G3V3H2	Q13023	A-kinase anchor protein 6	AKAP6	3	14	14	1215500000	5550	12035000	15	+	+	2.47488	0.038963	-1.66811	-0.73429	-0.408069	-0.129827	-2.33997	-2.24474	-1.6918
2359	H0YAJ5;G5E9Y1;Q92870;D6RB55;H0Y9U9;H0YA92;D6RDY3;D6RB00;D6RGD4;D6RAJ4;D6RD19	H0YAJ5;G5E9Y1;Q92870	Amyloid beta A4 precursor protein-binding family B member 2	APBB2	11	7	5	815160000	2359	23290000	7		+	2.48426	0.100758	0.610408	-2.0818	-1.91835	-1.95992	-1.22979	-1.52033	-1.37872
2067	E9PSI1;E9PQ80;E9PQI5;H0YI89;E9PL78;E9PJM1;E9PMQ9;O15321;E9PJC4;E9PQY7;E9PS99;G3V1B9	E9PSI1;E9PQ80;E9PQI5		CHMP4A	12	11	2	162080000	2067	160340000	2		+	2.48488	0.0694737	-0.731984	1.26792	1.00986	1.0836	0.486695	0.465052	0.213684
7690	Q92538	Q92538	Golgi-specific brefeldin A-resistance guanine nucleotide exchange factor 1	GBF1	1	39	39	12123000000	7690	134700000	57		+	2.50866	0.0872471	-0.655834	1.16367	0.906884	0.864891	0.395129	0.326609	0.246209
4787	P49366;A0A087WZK0;M0R253;M0QX43;A0A3B3IU31;B4E3M2;Q5J8M5;M0R0J4;M0QYZ7;M0R1T4;M0R264	P49366;A0A087WZK0;M0R253;M0QX43;A0A3B3IU31;B4E3M2;Q5J8M5	Deoxyhypusine synthase	DHPS	11	4	4	961280000	4787	43694000	6		+	2.5139	0.06752	-0.725246	-0.437143	-0.408503	-0.239684	-1.27666	-0.978802	-1.00561
8851	Q9H7U1;A0A2R8Y6V5;A0A2R8YGU6	Q9H7U1;A0A2R8Y6V5;A0A2R8YGU6	Serine-rich coiled-coil domain-containing protein 2	CCSER2	3	2	2	225270000	8851	5928300	2	+	+	2.53028	0.0470435	-0.951423	-0.0449776	-0.0158051	0.296842	-0.99455	-0.945797	-0.677862
4636	P40763;G8JLH9;K7EP08	P40763;G8JLH9	Signal transducer and activator of transcription 3;Signal transducer and activator of transcription	STAT3	3	27	27	36127000000	4636	926330000	82	+	+	2.55292	0.0502857	-0.835021	0.6853	0.731094	0.945685	-0.100131	0.143737	-0.186589
3239	O43303;I3L262;H3BMS1;H3BVH3;REV__Q6ZUS5	O43303	Centriolar coiled-coil protein of 110 kDa	CCP110	5	24	24	5582700000	3239	113930000	33		+	2.55989	0.0695696	-0.6755	0.0857126	-0.0532842	0.13585	-0.704681	-0.705304	-0.448238
7972	Q96FE7	Q96FE7	Phosphoinositide-3-kinase-interacting protein 1	PIK3IP1	1	2	2	672070000	7972	224020000	3		+	2.58611	0.0552381	0.75853	0.280275	0.580611	0.376907	1.05117	1.29626	1.16595
5126	P61587;E9PFH1;Q53RZ3	P61587;E9PFH1	Rho-related GTP-binding protein RhoE	RND3	3	6	6	915650000	5126	61044000	7		+	2.58842	0.0642778	0.699362	0.618482	0.933644	0.807638	1.54423	1.52724	1.38638
9807	Q9Y217;Q96EF0	Q9Y217	Myotubularin-related protein 6	MTMR6	2	25	23	17672000000	9807	581300000	37		+	2.62016	0.0535522	-0.727224	0.0563043	-0.182009	-0.169221	-0.770502	-0.735879	-0.970217
5005	P55073	P55073	Type III iodothyronine deiodinase	DIO3	1	3	3	1417100000	5005	118090000	4	+	+	2.63927	0.0494035	0.780116	2.45657	2.09334	2.22854	3.08546	3.07054	2.9628
7074	Q8IWU2	Q8IWU2	Serine/threonine-protein kinase LMTK2	LMTK2	1	13	13	2382600000	7074	41799000	14		+	2.64146	0.0647123	-0.674068	0.279593	0.390578	0.4661	-0.421798	-0.319412	-0.144722
1437	B8ZZD4;Q86VP1;C9J7J4;F8WBU9;C9JBZ7	B8ZZD4;Q86VP1	Tax1-binding protein 1	TAX1BP1	5	26	19	7246600000	1437	203530000	27		+	2.66171	0.0543636	-0.717357	0.0127991	0.199624	0.239021	-0.429634	-0.687214	-0.583778
6116	Q52MB2	Q52MB2	Coiled-coil domain-containing protein 184	CCDC184	1	3	3	3134500000	6116	313450000	5	+	+	2.66859	0.046381	-0.902755	-1.17666	-1.04127	-0.917097	-2.14516	-1.90601	-1.79212
273	A0A087X2D8;H0YBE9;H0YBS5;H0Y981	A0A087X2D8		SPAG9	4	42	1	603130000	273	163270900	2	+	+	2.67104	0	-2.67566	-0.476378	0.0851688	0.391708	-2.86484	-3.04044	-2.1212
6172	Q5F1R6;A0A2R8Y534;A0A2R8Y4Q0	Q5F1R6;A0A2R8Y534	DnaJ homolog subfamily C member 21	DNAJC21	3	6	6	448050000	6172	19480000	7	+	+	2.68062	0.0496923	-0.816826	0.400131	0.414283	0.697943	-0.384613	-0.364399	-0.189108
1239	B1AK44;Q9UI95;B1AK45;B1AK43	B1AK44;Q9UI95;B1AK45;B1AK43	Mitotic spindle assembly checkpoint protein MAD2B	MAD2L2	4	3	3	335800000	1239	30527000	3		+	2.70635	0.0789136	0.606148	0.175318	-0.0264186	-0.0623191	0.668597	0.681246	0.555182
8510	Q9BW72	Q9BW72	HIG1 domain family member 2A, mitochondrial	HIGD2A	1	1	1	3306100000	8510	826530000	2	+	+	2.74764	0.048549	-0.784244	0.69996	0.703016	0.652366	-0.306262	-0.0238948	0.0327664
6028	Q2KJY2;A0A0G2JR66;B7WPD9	Q2KJY2;A0A0G2JR66;B7WPD9	Kinesin-like protein KIF26B;Kinesin-like protein	KIF26B	3	20	20	3354500000	6028	36863000	24		+	2.75031	0.0543871	-0.693865	-0.590518	-0.803264	-0.664118	-1.3838	-1.49899	-1.2567
3678	O95273;H3BQA6;H3BR23;H3BUF4;REV__Q8N4P3;Q9Y2K3	O95273;H3BQA6;H3BR23	Cyclin-D1-binding protein 1	CCNDBP1	6	3	3	341930000	3678	34193000	3	+	+	2.77089	0.0476	-0.7786	-0.346482	-0.569962	-0.604858	-1.17156	-1.28848	-1.39706
1477	C9J1C6;Q9P0P0;F8WBU5;C9J391;H7C426	C9J1C6;Q9P0P0;F8WBU5;C9J391;H7C426	E3 ubiquitin-protein ligase RNF181	RNF181	5	2	2	643590000	1477	91941000	2	+	+	2.79942	0.047814	-0.793494	0.485458	0.505547	0.684137	-0.358712	-0.268466	-0.0781618
5015	P55273	P55273	Cyclin-dependent kinase 4 inhibitor D	CDKN2D	1	4	4	4118800000	5015	457650000	7		+	2.84439	0.0590286	-0.616599	-0.189677	-0.312947	-0.207307	-0.871299	-0.962016	-0.726413
2739	J3KPL8;O00213;A0A075B7G8;A0A087X0V7;A0A087WYH9;V9GY97;V9GYR7;V9GYD5	J3KPL8;O00213;A0A075B7G8;A0A087X0V7;A0A087WYH9	Amyloid beta A4 precursor protein-binding family B member 1	APBB1	8	19	17	19575000000	2739	776380000	31	+	+	2.8473	0.0487	-0.799566	-0.656717	-0.762412	-0.528277	-1.4916	-1.55366	-1.30084
8822	Q9H6L5;H0Y9U4	Q9H6L5	Protein FAM134B	FAM134B	2	8	8	3677100000	8822	229820000	15	+	+	2.85446	0.032875	-0.975783	-0.512962	-0.292463	-0.113672	-1.19864	-1.35033	-1.29748
5346	Q01581;D6RIW1	Q01581	Hydroxymethylglutaryl-CoA synthase, cytoplasmic	HMGCS1	2	24	23	145760000000	5346	5756000000	107	+	+	2.85977	0.0377647	-0.905177	0.14868	-0.0291007	-0.0262874	-0.809803	-0.745589	-1.06685
2455	H0YDG5;H7BY13	H0YDG5;H7BY13		ATP2B4	2	8	2	1708300000	2455	4203200000	6	+	+	2.86764	0.0455789	-0.827208	0.624102	0.480416	0.387475	-0.184896	-0.452456	-0.352281
334	A0A0A0MRJ2;Q5VTZ4;P18847	A0A0A0MRJ2;Q5VTZ4;P18847	Cyclic AMP-dependent transcription factor ATF-3	ATF3	3	3	3	353810000	334	44227000	4	+	+	2.86774	0	1.7069	-0.542235	-0.992013	-0.99647	0.64933	1.15966	0.780995
5740	Q14320;B0S8I6;Q9Y247	Q14320;B0S8I6	Protein FAM50A	FAM50A	3	7	7	1390000000	5740	86876000	9		+	2.87024	0.0562	-0.653676	0.700762	0.624977	0.836805	0.173825	0.026902	0.000786757
3988	P09238;F5GYX7;P08254	P09238;F5GYX7	Protein FAM50A	MMP10	3	6	6	394870000	3988	15795000	6	+	+	2.9093	0	1.71106	0.573588	0.924721	1.02717	2.23957	2.66542	2.75367
87	A0A087WUF6;A0A0A0MQV6;P09038	A0A087WUF6;A0A0A0MQV6;P09038	Fibroblast growth factor;Fibroblast growth factor 2	FGF2	3	1	1	369790000	87	36979000	2	+	+	2.91382	0.0416667	0.856386	0.507032	0.254772	0.4529	1.2268	1.15855	1.39852
5855	Q15154;H0YBA1;E7EV93;E9PGW9;E5RGQ4	Q15154	Pericentriolar material 1 protein	PCM1	5	27	27	3838700000	5855	44636000	32	+	+	2.93816	0.0350667	-0.93704	0.121439	0.228322	0.204561	-0.710272	-0.957128	-0.589399
20	G5E9M9;A0A075B6E4;A0A0A6YYI5;G5E9M7;Q14135;E7ERW0;E7EQU6;E7EWF5	G5E9M9;A0A075B6E4;A0A0A6YYI5;G5E9M7;Q14135;E7ERW0;E7EQU6;E7EWF5	Transcription cofactor vestigial-like protein 4	VGLL4	8	2	2	150800000	20	11600000	3	+	+	2.94565	0.0252632	1.22139	0.489245	0.575982	0.706665	1.55609	1.99784	1.88213
9467	Q9UBS3	Q9UBS3	DnaJ homolog subfamily B member 9	DNAJB9	1	3	3	236400000	9467	19700000	3	+	+	2.94974	0.0460426	-0.708987	0.137314	-0.0694212	-0.0540521	-0.80849	-0.637711	-0.66692
10105	Q9Y6Y0;H0Y5Y2;X6R674	Q9Y6Y0	Influenza virus NS1A-binding protein	IVNS1ABP	3	7	7	2597100000	10105	83778000	8	+	+	2.96071	0.0356364	-0.887579	-0.320947	-0.656384	-0.372257	-1.35573	-1.30538	-1.35122
8280	Q99608	Q99608	Necdin	NDN	1	6	6	1791500000	8280	99527000	6	+	+	2.98501	0.0348333	-1.01601	0.387455	0.481346	0.591515	-0.615601	-0.648856	-0.323248
167	A0A087WY82;Q9Y624	A0A087WY82;Q9Y624	Junctional adhesion molecule A	F11R	2	4	4	919810000	167	65701000	5	+	+	3.06374	0.0478519	0.631927	0.106548	0.211415	0.250555	0.902006	0.713655	0.848638
9390	Q9P258	Q9P258	Protein RCC2	RCC2	1	15	15	8952700000	9390	331580000	25		+	3.07648	0.054375	0.586562	0.194019	0.378362	0.208993	0.874931	0.792634	0.873496
2604	H7BY36	H7BY36		EWSR1	1	6	2	165820000	2604	11845000	2	+	+	3.10942	0.0339355	0.832826	-0.236651	0.0227893	-0.190688	0.654357	0.783203	0.656369
5600	Q13319	Q13319	Cyclin-dependent kinase 5 activator 2	CDK5R2	1	2	2	233000000	5600	12944000	3	+	+	3.12301	0	-1.94083	-0.457146	0.139431	0.0891842	-1.89291	-2.18146	-1.97665
6072	Q3MII6;C9JMI8	Q3MII6;C9JMI8	TBC1 domain family member 25	TBC1D25	2	3	3	157870000	6072	6314900	3		+	3.17621	0.0571525	-0.576456	0.0514625	0.0222582	0.115188	-0.426372	-0.611251	-0.502838
6436	Q68CQ7;C9J880;H7C4V6	Q68CQ7;C9J880	Glycosyltransferase 8 domain-containing protein 1	GLT8D1	3	5	5	349450000	6436	15884000	5	+	+	3.23281	0.0487547	-0.59886	0.684411	0.629465	0.721636	-0.0287384	0.138793	0.128878
866	A0A2R8YDT1;P15104	A0A2R8YDT1;P15104	Glutamine synthetase	GLUL	2	6	6	2728600000	866	129930000	11	+	+	3.24815	0.0512	-0.585864	0.656201	0.64577	0.696163	0.0126504	0.0352347	0.192655
4481	P30260;G5EA36;F6QPS0;I3L394;I3L3H6;I3L2Z8;I3L328;I3L1K3;I3L225	P30260;G5EA36	Cell division cycle protein 27 homolog	CDC27	9	18	18	6424700000	4481	164740000	25		+	3.26068	0.0598841	0.527916	0.335782	0.464492	0.3715	0.898956	0.987917	0.868648
2048	E9PQR4;P50607;A0A087WT25;O00294;H0YFU8;H0YG12;F5H7B9;O75386	E9PQR4;P50607	Tubby-like protein;Tubby protein homolog	TUB	8	9	9	2858600000	2048	109950000	10		+	3.28314	0.0948636	0.466146	-0.344973	-0.323117	-0.427872	0.162284	0.0896439	0.050548
5754	Q14534;E7EVQ6;H0YBN7;E5RJH9	Q14534;E7EVQ6;H0YBN7	Squalene monooxygenase	SQLE	4	9	9	2963600000	5754	118550000	15	+	+	3.3102	0.0218182	-0.893827	-1.0876	-1.0293	-0.973137	-1.85383	-2.08281	-1.83488
4914	P52292;J3QLL0;J3KS65	P52292	Importin subunit alpha-1	KPNA2	3	17	17	26343000000	4914	1317200000	32	+	+	3.31685	0.0463673	-0.603779	0.383676	0.330969	0.382465	-0.154808	-0.216468	-0.342949
3861	P04350;M0QY85;M0R278;M0QY37;M0QX14;M0QZL7;M0R1I1	P04350	Tubulin beta-4A chain	TUBB4A	7	34	4	131740000000	3861	9040500000	58	+	+	3.36743	0.0363478	0.820405	-0.987359	-1.08614	-1.00261	-0.11074	-0.162162	-0.341985
8964	Q9HCI5	Q9HCI5	Melanoma-associated antigen E1	MAGEE1	1	11	11	3398700000	8964	97105000	14	+	+	3.3749	0.0404615	-0.787134	0.252669	0.208273	0.252657	-0.646327	-0.591895	-0.409582
3215	O43164	O43164	E3 ubiquitin-protein ligase Praja-2	PJA2	1	15	14	6775400000	3215	315460000	23	+	+	3.40795	0.00729412	-0.996141	0.203465	0.189586	0.407143	-0.829827	-0.631315	-0.727086
6554	Q6P4E1;A0A3B3IRW9;H0YMR0;H0YM51	Q6P4E1;A0A3B3IRW9;H0YMR0	Protein CASC4	CASC4	4	10	10	10377000000	6554	471700000	15		+	3.53548	0.0544138	-0.527526	0.415268	0.451488	0.401404	-0.0238778	-0.125889	-0.16465
9950	Q9Y4B5;J3QL92;REV__A6NCL7	Q9Y4B5	Microtubule cross-linking factor 1	MTCL1	3	46	40	5927500000	9950	53886000	43	+	+	3.53938	0	1.14733	0.374548	0.545522	0.684591	1.66035	1.75291	1.63339
8498	Q9BVN2;A0A087WVK5;A0A087WX95;A0A087WW20;A0A087WYU8;A0A087WZ68;Q68CX2;A0A087WYB2	Q9BVN2	RUN and SH3 domain-containing protein 1	RUSC1	8	11	11	1447300000	8498	36182000	13	+	+	3.66108	0	-0.957898	0.0705123	-0.128287	0.0376036	-0.973676	-1.03443	-0.885756
3894	P05412;U3KPR5;P17275	P05412	Transcription factor AP-1	JUN	3	4	2	222440000	3894	40033000	2	+	+	3.6613	0	2.72696	-1.6711	-1.97577	-1.36761	0.811817	1.19387	1.16071
9299	Q9NYX4	Q9NYX4	Neuron-specific vesicular protein calcyon	CALY	1	4	4	2632800000	9299	263280000	9	+	+	3.68041	0.0228571	-0.77481	0.558396	0.38887	0.436053	-0.37869	-0.277683	-0.284738
4705	P45984;J3KNK1	P45984;J3KNK1	Mitogen-activated protein kinase 9	MAPK9	2	9	4	2034300000	4705	109530000	5	+	+	3.78809	0.0467273	-0.542202	-0.222205	-0.0860894	-0.158482	-0.704949	-0.694336	-0.694097
8526	Q9BX40;Q5TBQ0;Q5TBQ1;A0A0C4DFV2	Q9BX40;Q5TBQ0	Protein LSM14 homolog B	LSM14B	4	17	6	2621200000	8526	1192000000	6	+	+	3.79507	0.0362759	-0.657884	0.276902	0.314983	0.416613	-0.288622	-0.366391	-0.310141
9641	Q9UKN8;F2Z356	Q9UKN8	General transcription factor 3C polypeptide 4	GTF3C4	2	13	12	4257900000	9641	77417000	14		+	3.80392	0.0932874	0.41755	0.275211	0.307281	0.358394	0.747003	0.695435	0.751098
1572	C9JR56;Q9UPW6;F8WCV6;Q01826	C9JR56;Q9UPW6	DNA-binding protein SATB;DNA-binding protein SATB2	SATB2	4	7	7	573310000	1572	15925000	7	+	+	3.80615	0.00688889	-0.821873	2.07319	2.05868	2.04838	1.32414	1.26472	1.12577
9829	Q9Y295;H0YI06;F8WEE0	Q9Y295	Developmentally-regulated GTP-binding protein 1	DRG1	3	14	13	7959000000	9829	367510000	23	+	+	3.81191	0.0405405	-0.595035	0.161015	0.171696	0.110443	-0.371741	-0.496195	-0.474014
9712	Q9ULX6;V9GZ50;M0R1Y5;M0R010;M0QYT7	Q9ULX6	A-kinase anchor protein 8-like	AKAP8L	5	19	19	4996200000	9712	208170000	23		+	3.8451	0.0714	-0.432866	-0.237754	-0.302298	-0.286245	-0.740941	-0.721299	-0.662654
1786	E5RGX5;Q93045	E5RGX5;Q93045	Stathmin;Stathmin-2	STMN2	2	13	7	101180000000	1786	10118000000	35	+	+	3.92993	0	-2.80918	0.641628	0.527641	0.094686	-2.21344	-2.45906	-2.49109
8727	Q9H2B2;M0QZF3	Q9H2B2	Synaptotagmin-4	SYT4	2	14	14	9215900000	8727	485050000	27	+	+	3.96894	0.0375714	-0.639075	0.107541	0.147655	0.112697	-0.516246	-0.585695	-0.447392
3849	P04035;H0Y8F6;H0Y8K6	P04035	3-hydroxy-3-methylglutaryl-coenzyme A reductase	HMGCR	3	12	12	1287000000	3849	32174000	16	+	+	3.99618	0	-2.73162	0.212394	0.547275	0.751683	-2.07807	-2.25678	-2.34867
9001	Q9NP84;I3L1J9	Q9NP84	Tumor necrosis factor receptor superfamily member 12A	TNFRSF12A	2	3	3	627560000	9001	89652000	4	+	+	4.03733	0	2.19037	1.60366	1.79455	1.9752	4.14609	3.94609	3.85236
6943	Q86VR8	Q86VR8	Four-jointed box protein 1	FJX1	1	6	6	1083600000	6943	57032000	6	+	+	4.04912	0.024	0.713112	0.668679	0.776124	0.634289	1.38451	1.40525	1.42867
2652	H7C3L5	H7C3L5		TAX1BP1	1	9	2	144990000	2652	203530000	3	+	+	4.16623	0	-0.798665	0.442572	0.451647	0.349047	-0.371787	-0.334057	-0.446883
3090	O14782;F8WAR6;F8WER6	O14782;F8WAR6;F8WER6	Kinesin-like protein KIF3C;Kinesin-like protein	KIF3C	3	20	14	3368100000	3090	71662000	20	+	+	4.18589	0	-1.39678	-0.369103	-0.340405	-0.338943	-1.62359	-1.89665	-1.71855
3760	O95864;E5RGD8;E5RGZ5	O95864	Fatty acid desaturase 2	FADS2	3	11	10	5801200000	3760	324750000	15	+	+	4.24708	0	-1.43846	-0.565166	-0.434855	-0.512198	-1.81858	-2.06322	-1.94579
5307	P98170;B1AKU2	P98170	E3 ubiquitin-protein ligase XIAP	XIAP	2	9	9	2509000000	5307	76031000	9		+	4.68685	0.0552787	-0.423812	-0.309374	-0.362331	-0.35614	-0.752159	-0.777142	-0.76998
585	Q9NZ72;A0A0J9YW36;A0A0J9YXY4	Q9NZ72;A0A0J9YW36;A0A0J9YXY4	Stathmin-3	STMN3	3	12	11	31229000000	585	2081900000	28	+	+	5.03815	0	-1.99242	-0.23908	-0.204723	-0.201446	-2.12327	-2.34459	-2.15466
5515	Q12840;J3KNA1	Q12840;J3KNA1	Kinesin heavy chain isoform 5A;Kinesin-like protein	KIF5A	2	55	39	80892000000	5515	1394700000	98	+	+	5.36242	0	-1.93252	-0.425959	-0.549134	-0.593835	-2.40896	-2.45942	-2.4981
1872	E7ETZ8;Q49MG5;A2VCS9;A0A0C4DG83;C9JXH8;A8MSM7	E7ETZ8;Q49MG5;A2VCS9;A0A0C4DG83	Microtubule-associated protein 9	MAP9	6	9	9	970340000	1872	32345000	9	+	+	6.34389	0	2.48701	-1.12295	-1.10361	-1.20426	1.3844	1.35436	1.29144
