# Supplementary material for: Time‑resolved multi-omic analysis of paclitaxel exposure in human iPSC‑derived sensory neurons unveils mechanisms of chemotherapy‑induced peripheral neuropathy
Source: Cell Death Dis. 2026 Feb 10;17(1):211. doi: 10.1038/s41419-026-08445-2 (PMC12921266; doi:10.1038/s41419-026-08445-2)
Supplement: Supplementary file 13 — Suppl. Table 4. [file 41419_2026_8445_MOESM13_ESM.xlsx]

## Sheet: Suppl_Table4
symbol	disco	log2FoldChange.protein	log2FoldChange.RNA	pvalue.protein	pvalue.RNA
HMGCR	88.9605	-2.73162	-1.1869	0.000100883	3.61017e-24
MMP10	74.0967	1.71106	1.85637	0.00123226	3.81716e-21
SCD	62.5098	-2.65793	-1.15863	0.00757635	6.64212e-19
JUN	58.2644	2.72696	0.994415	0.000218122	1.4971e-18
SESN2	42.156	1.28152	1.38145	0.00550171	2.80149e-22
ATF3	34.63	1.7069	1.49635	0.00135599	2.0382e-11
TNFRSF12A	29.9362	2.19037	1.07779	9.17644e-05	2.27288e-09
MSMO1	22.7761	-1.06531	-1.13004	0.0752479	1.59997e-18
FADS2	19.2364	-1.43846	-0.80542	5.6614e-05	4.39961e-13
SQLE	18.9797	-0.893827	-0.917142	0.000489554	1.43769e-20
HMGCS1	18.3834	-0.905177	-1.01113	0.00138113	5.94663e-18
FDFT1	17.9254	-1.27167	-0.921203	0.0360319	1.38545e-14
NEDD4	17.1406	3.22783	1.0687	0.299756	3.58376e-05
CALCB	14.1543	0.689601	2.43612	0.8038	4.67143e-09
SOX11	13.0254	2.36143	0.502124	0.144617	7.15549e-11
DHCR24	12.827	-1.58963	-0.593198	0.0375935	6.63762e-13
TMEM97	11.3396	-0.456896	-1.37741	0.326767	2.93247e-18
ITGB8	11.0379	0.79519	1.8901	0.194556	2.32818e-07
PPP1R17	10.1861	1.00155	1.61224	0.0310995	1.58142e-05
IDI1	9.49119	-0.506977	-1.01289	0.0317923	1.03475e-17
LSS	9.45563	-0.447344	-0.949253	0.0713883	7.57055e-22
WEE1	9.30371	0.653484	0.964306	0.00415127	4.14709e-13
ABCB1	9.09129	0.908453	1.80557	0.0142165	0.000201688
PIRT	6.88778	0.642837	1.08433	0.0241893	5.43324e-09
GBP2	6.64173	0.378182	1.7382	0.0954811	8.24934e-10
SC5D	6.49089	-0.710164	-0.710204	0.00738139	1.82949e-11
LRP4	5.71051	1.90126	1.28888	0.216033	0.0216339
MYPN	5.44381	-0.776278	-1.32805	0.014214	0.000368847
LDLR	5.05115	-0.931338	-0.665809	0.0160715	4.4479e-07
ARHGEF28	4.94737	-0.529543	-1.12997	0.0159024	3.39202e-07
LDLR	4.55993	-0.813858	-0.665809	0.00864448	4.4479e-07
ULBP1	4.52227	0.707863	1.04316	0.0345881	2.17156e-05
STMN4	4.39838	0.548944	0.753196	0.0594554	3.87154e-10
CCDC184	4.28711	-0.902755	-0.541519	0.00214494	7.92447e-07
SMAD1	4.11202	0.55235	0.830324	0.0189421	5.71055e-08
RNF145	4.10297	-2.30288	-0.352382	0.00464668	0.00189137
WNT11	3.85612	0.796337	1.00974	0.0791227	0.000202348
NES	3.7976	0.411644	0.840343	0.102265	1.02821e-10
SLC1A3	3.66987	0.259585	5.30297	0.798265	0.00270333
HEG1	3.49958	0.494046	0.96719	0.0539304	8.79756e-07
CASP3	3.37093	0.370145	0.920792	0.0632196	2.0356e-09
FJX1	3.07644	0.713112	0.521392	8.93057e-05	5.95547e-05
DIO3	2.98123	0.780116	0.617997	0.0022947	0.000285461
SPCS3	2.85559	-0.666652	-0.482144	0.0381974	3.41772e-08
FAM53C	2.84281	0.557457	0.637779	0.0286948	3.51807e-07
IQGAP3	2.84048	0.332489	3.07621	0.1101	0.0151731
IGFBPL1	2.7962	0.771576	0.926815	0.458583	0.000268167
VGLL4	2.79033	1.22139	0.455536	0.0011333	0.00852258
KCTD8	2.76343	-0.517712	-0.788021	0.0812933	2.0716e-06
C11orf98	2.59316	-0.762181	-2.10903	0.112604	0.216394
CYP51A1	2.47125	-1.29982	-0.456367	0.00470019	0.0145174
MTHFD2	2.40932	0.324541	0.722745	0.0142458	3.75581e-09
ICAM1	2.3777	1.44158	0.857087	0.194693	0.0611313
RCC2	2.32367	0.586562	0.52725	0.000838526	3.65575e-05
SYNJ2	2.32142	0.69573	1.10942	0.154141	0.00637537
RND3	2.27952	0.699362	0.373517	0.00257978	7.27976e-07
GAS2L3	2.26966	0.312041	1.16487	0.306611	1.85896e-06
JMJD1C	2.16643	0.827111	0.614179	0.0394632	0.00137766
ST3GAL1	2.1639	0.333745	0.941526	0.111371	1.16643e-06
KNDC1	2.11251	-0.866677	-0.459268	0.0106182	0.000464105
HSD17B7	2.10988	-0.287587	-0.971808	0.227051	1.24332e-07
C1QL3	2.09193	-0.440605	-0.959073	0.121081	9.25687e-05
GPBP1	2.05029	-1.27511	-0.369259	0.0574993	0.000768884
IRX5	2.04442	-1.24864	-0.464897	0.0447829	0.00671435
GNAI1	2.0362	-0.490913	-0.409229	0.176376	4.14888e-10
TUBB	2.03573	0.431177	0.435399	0.0891212	1.60817e-10
TMEM229A	2.02714	1.41765	0.576184	0.0636447	0.0518212
ZNF423	2.02614	-0.318385	-0.621606	0.0176806	3.27209e-09
SNCAIP	2.00131	0.980338	1.30027	0.401278	0.0670712
SH2D3C	1.99249	0.413531	0.74518	0.0410888	8.32565e-06
FGF2	1.98934	0.856386	0.481277	0.00121949	0.0122231
FADS1	1.93483	-0.484456	-0.530246	0.0393114	7.47278e-07
GFAP	1.92637	0.564664	3.33001	0.866146	0.109126
NECAB3	1.88402	-0.901486	-0.454551	0.0112215	0.00225009
ATF7	1.85506	-1.26749	-0.44243	0.0413562	0.011897
FILIP1	1.8505	0.662123	0.84798	0.103901	0.00487016
DHCR7	1.84988	-0.162075	-0.920804	0.755552	5.32505e-13
CDK5R2	1.80617	-1.94083	-0.206525	0.000753338	0.041393
WDR35	1.76024	0.539158	0.714271	0.0166562	0.00161295
CMTM3	1.75894	0.544488	0.792577	0.0365097	0.00229997
EIF2AK3	1.71887	0.173371	1.06691	0.393782	1.29438e-09
FBXW9	1.66942	-0.499582	-0.803701	0.276153	0.000251796
RABGAP1L	1.64486	0.519722	0.545974	0.0268495	5.94706e-05
PHGDH	1.60371	0.201715	1.01544	0.39786	3.72215e-08
NGF	1.60068	0.0716458	5.03848	0.862501	4.26641e-05
MAGEE1	1.5504	-0.787134	-0.259309	0.000421796	6.01204e-05
TUFT1	1.52479	1.575	0.334506	0.0427933	0.0298156
FGF1	1.5117	0.471691	0.685878	0.122802	0.000173044
HELZ2	1.49551	0.618303	0.607375	0.0643046	0.00161985
NDRG1	1.48103	0.206136	0.803028	0.43241	2.61262e-09
FDPS	1.47918	-0.217168	-0.733641	0.436981	1.18959e-09
CDC42SE2	1.40284	-1.16148	-0.317324	0.0211909	0.00737269
TUBB6	1.40012	0.274388	0.74622	0.144859	1.00226e-06
LIPG	1.39916	-0.0511733	-1.8018	0.546087	1.22503e-15
BLOC1S1	1.39404	0.368419	1.56744	0.17629	0.0218648
NAP1L2	1.38782	-0.68224	-0.32368	0.00819644	6.33504e-05
HMGN3	1.35885	1.44197	0.571905	0.198707	0.113251
LYNX1	1.35232	-0.71998	-0.365416	0.13329	5.4339e-05
PHYHIP	1.27734	-0.29326	-0.662722	0.0108398	2.46953e-05
BBC3	1.24345	0.176997	0.963361	0.0218304	2.33589e-06
