# Supplementary material for: Time‑resolved multi-omic analysis of paclitaxel exposure in human iPSC‑derived sensory neurons unveils mechanisms of chemotherapy‑induced peripheral neuropathy
Source: Cell Death Dis. 2026 Feb 10;17(1):211. doi: 10.1038/s41419-026-08445-2 (PMC12921266; doi:10.1038/s41419-026-08445-2)
Supplement: Supplementary file 14 — Suppl. Table 5. [file 41419_2026_8445_MOESM14_ESM.xlsx]

## Sheet: Suppl_Table5
Media and reagents
Reagent or Resource	Source	Identifier
Stem cell culture and maintenance
E8	Homemade	Homemade by CUSCO according to PMID 21478862
Geltrex	Gibco	A1413201
UltraPure™ 0.5 M EDTA	Invitrogen	15575020
Stem Cell Differentiation
KnockOut™ DMEM	ThermoFisher	10829018
CTS™ KnockOut™ SR XenoFree Medium	Gibco	12618012
MEM Non-essential Amino Acid Solution (100×)	Sigma	M7145-100ML
GlutaMAX™ Supplement	Gibco	35050061
3-Mercapto-ethanol	Gibco	31350010
LDN-193189	Sigma	SML0559-25MG
SB-431542	Peprotech	3014193
CHIR99021	Sigma	SML1046-25MG
DAPT	Sigma	D5942-25MG
SU5402	Sigma	SML0443-25MG
Neurobasal-Medium	Gibco	21103049
N-2 Supplement (100X)	Gibco	17502048
B-27™ Supplement (50X), minus vitamin A	Gibco	12587010
Mitomycin C from Streptomyces caespitosus	Sigma	M4287
Human/Mouse/Rat BDNF, Animal-Free Recombinant Protein	Peprotech	AF-450-02-250
Human GDNF, Animal-Free Recombinant Protein	Peprotech	AF-450-10-250
Human beta-NGF, Animal-Free Recombinant Protein	Peprotech	AF-450-01-250
Human NT-3, Animal-Free Recombinant Protein	Peprotech	AF-450-03-250
TrypLe select	Gibco	12563011
ROCK inhibitor Y-27632	StemCell Technologies	72304
Pen/Strep 100x	Gibco	15140-122
Biological samples
BIHi264-A	CUSCO (CoreFacility)	https://hpscreg.eu/cell-line/BIHi264-A
BIHi005-A	CUSCO (CoreFacility)	https://hpscreg.eu/cell-line/BIHi005-A
Assays
MTT (3-[4,5-dimethylthiazol-2-yl]-2,5 diphenyl tetrazolium bromide)	Sigma	M5655
Sodium dodecyl sulfate (SDS)	Carl Roth	CN 30.3
RealTime-Glo™ MT Cell Viability Assay	Promega	G9713
Cytotox-Fluor Assay	Promega	G9260
Non-standard plasticware
8-chamber-slides	Ibidi	80826
Clear bottom 24-well imaging plates	ibidi	82426
Black bottom 96-well microplate	Greiner Bio-One	655209
White wall, clear bottom 96-well imaging plates	Greiner	655098
MultiElectrodeArrays
48-well MEA plate	AxionBiosystems	M768-tMEA-48W
Borate buffer	ThermoScientific	28341
Polyethylenimin (PEI) 0.07%	Sigma	408727-100ML
Stainings, live cell imaging
ROTI®Histofix	Carl Roth	P087.4
Bovine Serum Albumine (BSA)	Sigma	A2153
Normal Goat Serum	Abcam	ab7481
Triton X	Sigma	X100-5ML
Peripherin (rabbit, 1:1000)	ThermoFisher	PA1-10018
Neurofilament Light Chain (mouse, 1:1000)	Uman Diagnostics	UD2
TRPM8 (rabbit, 1:100)	Abcam	ab3243
TRPV4 (rabbit, 1:100)	LifeSpan	LS-C94498
Goat anti-rabbit Alexa 488 (1:600)	Invitrogen	A-11034
Goat anti-mouse Alexa 488 (1:600)	Invitrogen	A-11029
anti-mouse Alexa 568 (1:600)	Invitrogen	A-11031
DRAQ5 (1:500)	Thermo Scientific	62251
ProLong™ Gold Antifade Mountant DAPI	Molecular Probes	P36931
Fluo-4 AM	Molecular Probes	F-127
Pluronic™ F-127 (20% Solution in DMSO)	Life Technologies	P6866
Neurobasal Media Phenolred-free	Gibco	12348017
Calcein (1:1000)	Invitrogen	C1430
ATP disodium salt	Tocris	Cat. No. 3245
Icilin	Tocris	Cat. No. 1531
Capsaicin	Hello Bio	HB1179
Compounds
Paclitaxel	Adipogen	CDX-P0188
DMSO	Invitrogen	C1430
RNA sequencing
Aurum™ Total RNA Mini Kit	BioRad	#732-6820
Proteome
Dithiothreitol (DTT)	Sigma	43815
2-Chloracetamid (CAA)	Sigma	C0267
Sodium Deoxycholate (SDC)	Sigma	D6750
NaCl	Sigma	71376
Tris-HCL	Sigma	T2694
HEPES	Thermo Scientific	J63218.AE
Benzonase® Endonuclease from Serratia marcescens	Merck	101695
Endopeptidase LysC	FUJIFILM Wako	121-05063
Sequence-grade trypsin	Promega	V511X
16-plex tandem mass tag	Fisher Scientific	A44520
Lipidome
Internal Standards Kits for Lipidyzer™	Sciex	https://sciex.com/br/products/consumables/lipidyzer-platform-kits
Software and algorithms
Prism	https://www.graphpad.com/
R studio	https://www.rstudio.com/
Biorender	https://www.biorender.com/
ImageJ	https://imagej.net/ij/
Molecular Devices pClamp 10.4 software package	https://info.moleculardevices.com
Harmony® Office Software	https://www.perkinelmer.com/de/
MaxQuant software package v 1.6.10.43	https://www.maxquant.org/
Lipidomics Workflow Manager Software	https://sciex.com/
Leica LASX imaging software	https://www.leica-microsystems.com/
Tecan SparkControl	https://www.tecan.com/
MikroWin Software	https://www.berthold.com/
Axion Biosystems AxIS Navigator	https://www.axionbiosystems.com/
NovaSeq Control Software v1.7	https://support.illumina.com/
